# Supplementary material for: Synthesis and Biological Application of Isosteviol-Based 1,3-Aminoalcohols
Source: MDPI journal article supplement (doi:10.3390/ijms222011232), 2021-10-18

**Supporting informations  
for  
Synthesis and biological application of isosteviol-  
based 1,3-aminoalcohols**

**Dániel Ozsvár <sup>1</sup>, Viktória Nagy <sup>2</sup>, István Zupkó <sup>2,3</sup> and Zsolt Szakonyi <sup>1,3\*</sup>**

<sup>1</sup> Institute of Pharmaceutical Chemistry, University of Szeged, Interdisciplinary Excellent Center, H-6720 Szeged, Eötvös utca 6, Hungary; ozsmozs88@gmail.com

<sup>2</sup> Department of Pharmacodynamics and Biopharmacy, University of Szeged, H-6720 Szeged, Eötvös utca 6, Hungary; zupko.istvan@szte.hu, nagy.viktoria07@gmail.com

<sup>3</sup> Interdisciplinary Centre of Natural Products, University of Szeged, H-6720 Szeged, Eötvös utca 6, Hungary

\* Correspondence: szakonyi.zsolt@szte.hu; Tel.: +36-62-546809; Fax: +36-62-545705

## Contents

$^1\text{H}$ ,  $^{13}\text{C}$  NMR, COSY, NOESY, HSQC, HMBC spectra of new compounds 3 - 151

$^1\text{H}$ -NMR of compound (4*R*,6*aS*,8*R*,9*S*,11*bS*)-Methyl 7-formyl-8-hydroxy-4,9,11*b*-trimethyltetradecahydro-6*a*,9-methanocyclohepta[*a*]naphthalene-4-carboxylate (**4**)

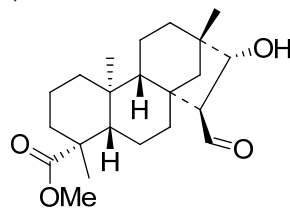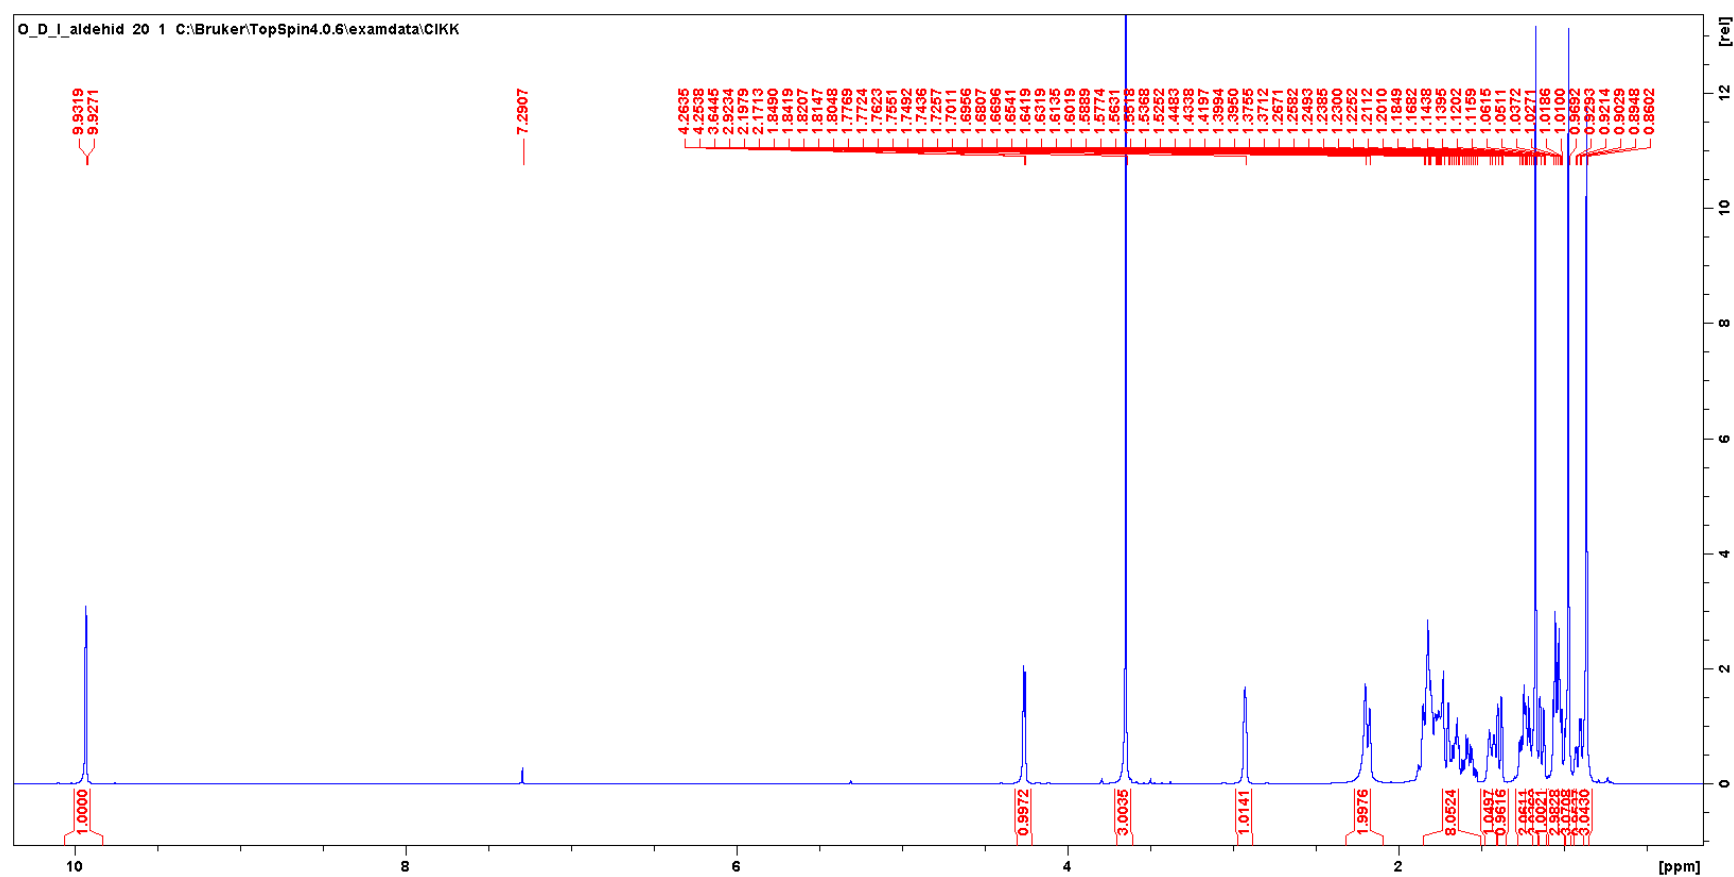

$^{13}\text{C}$ -NMR of compound (4*R*,6*aS*,8*R*,9*S*,11*bS*)-Methyl 7-formyl-8-hydroxy-4,9,11*b*-trimethyltetradecahydro-6*a*,9-methanocyclohepta[*a*]naphthalene-4-carboxylate (**4**)

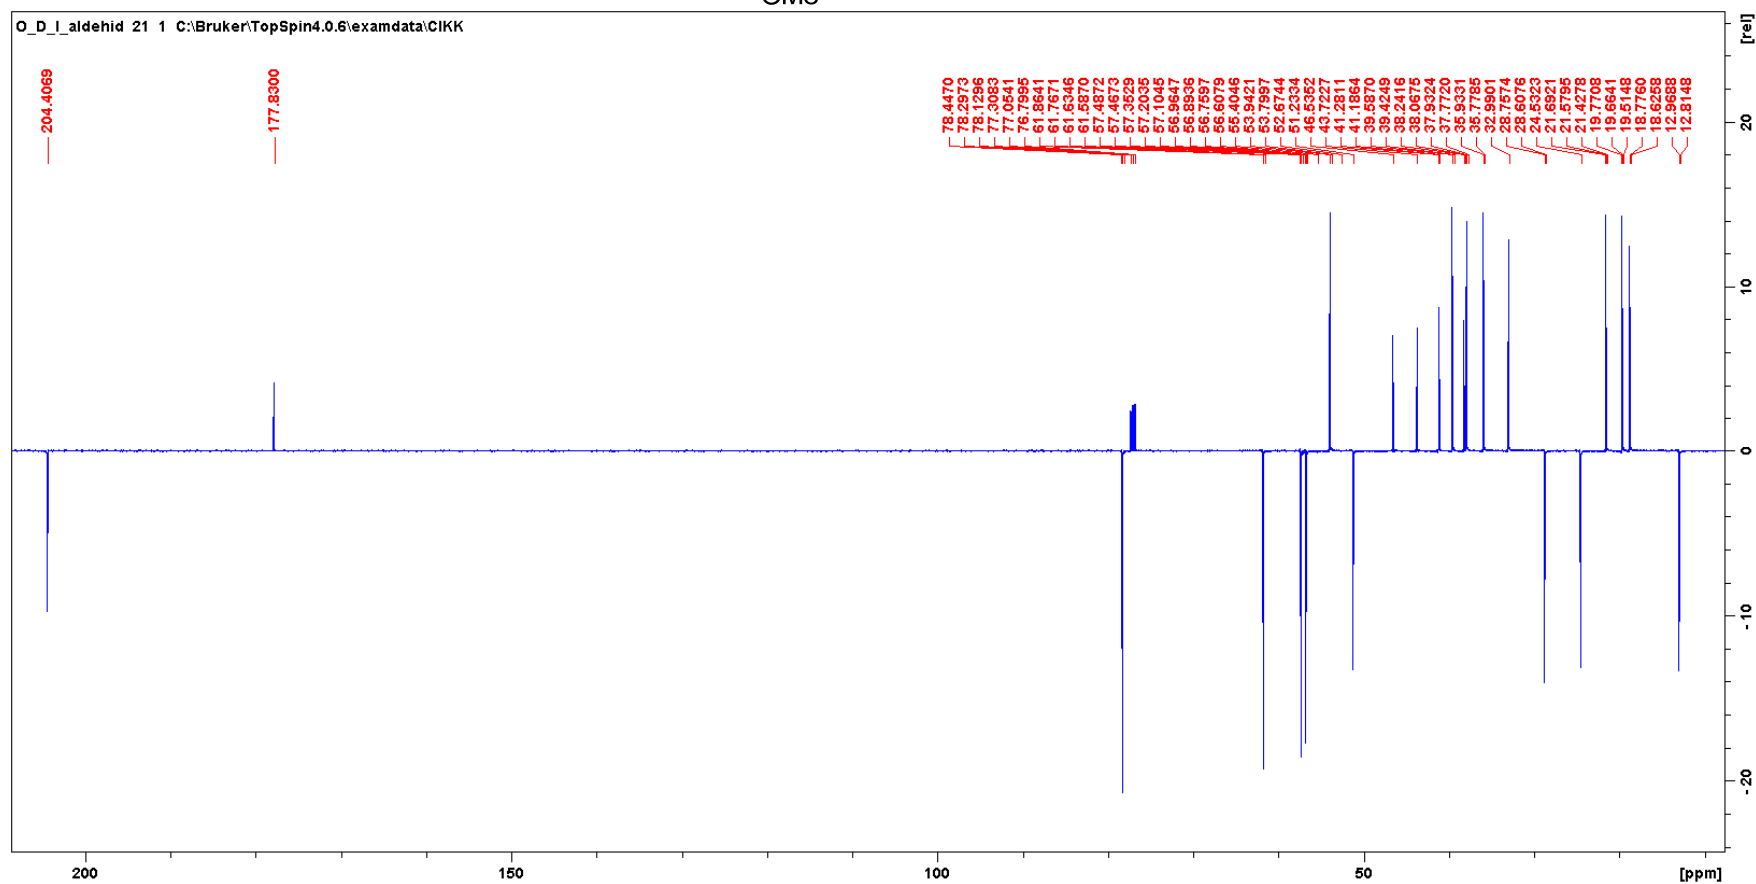

COSY of compound (4*R*,6*aS*,8*R*,9*S*,11*bS*)-Methyl 7-formyl-8-hydroxy-4,9,11*b*-trimethyltetradecahydro-6*a*,9-methanocyclohepta[*a*]naphthalene-4-carboxylate (**4**)

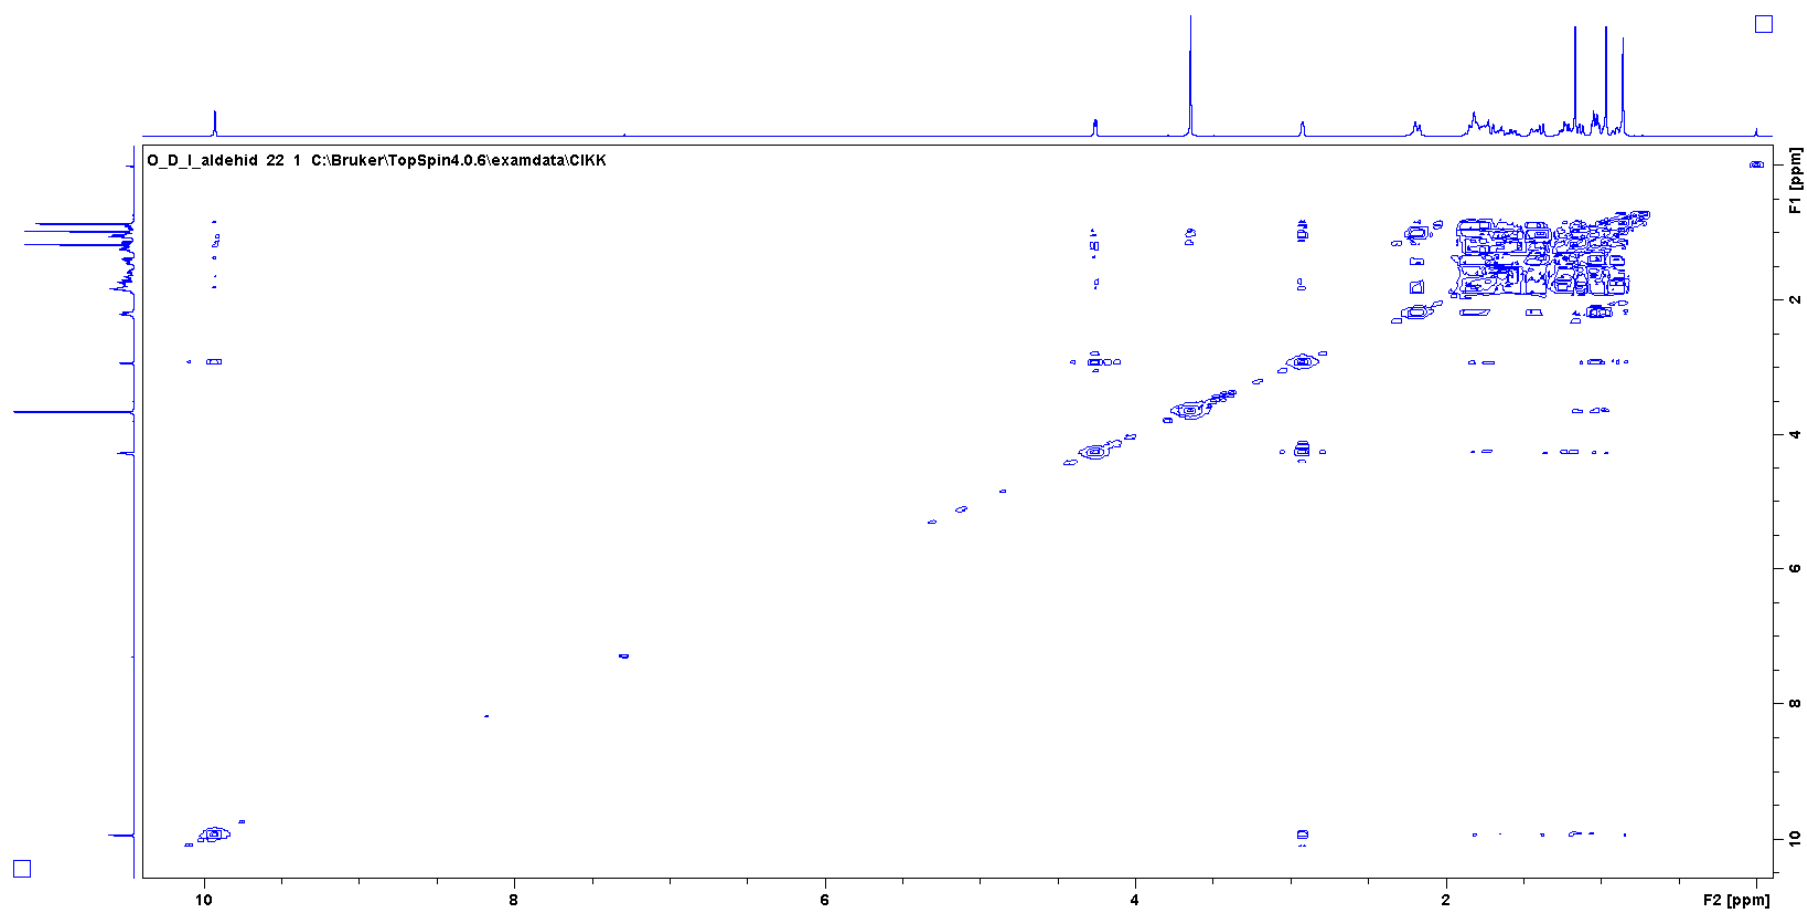

NOESY of compound (4*R*,6*aS*,8*R*,9*S*,11*bS*)-Methyl 7-formyl-8-hydroxy-4,9,11*b*-trimethyltetradecahydro-6*a*,9-methanocyclohepta[*a*]naphthalene-4-carboxylate (**4**)

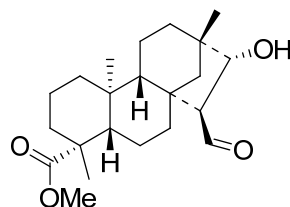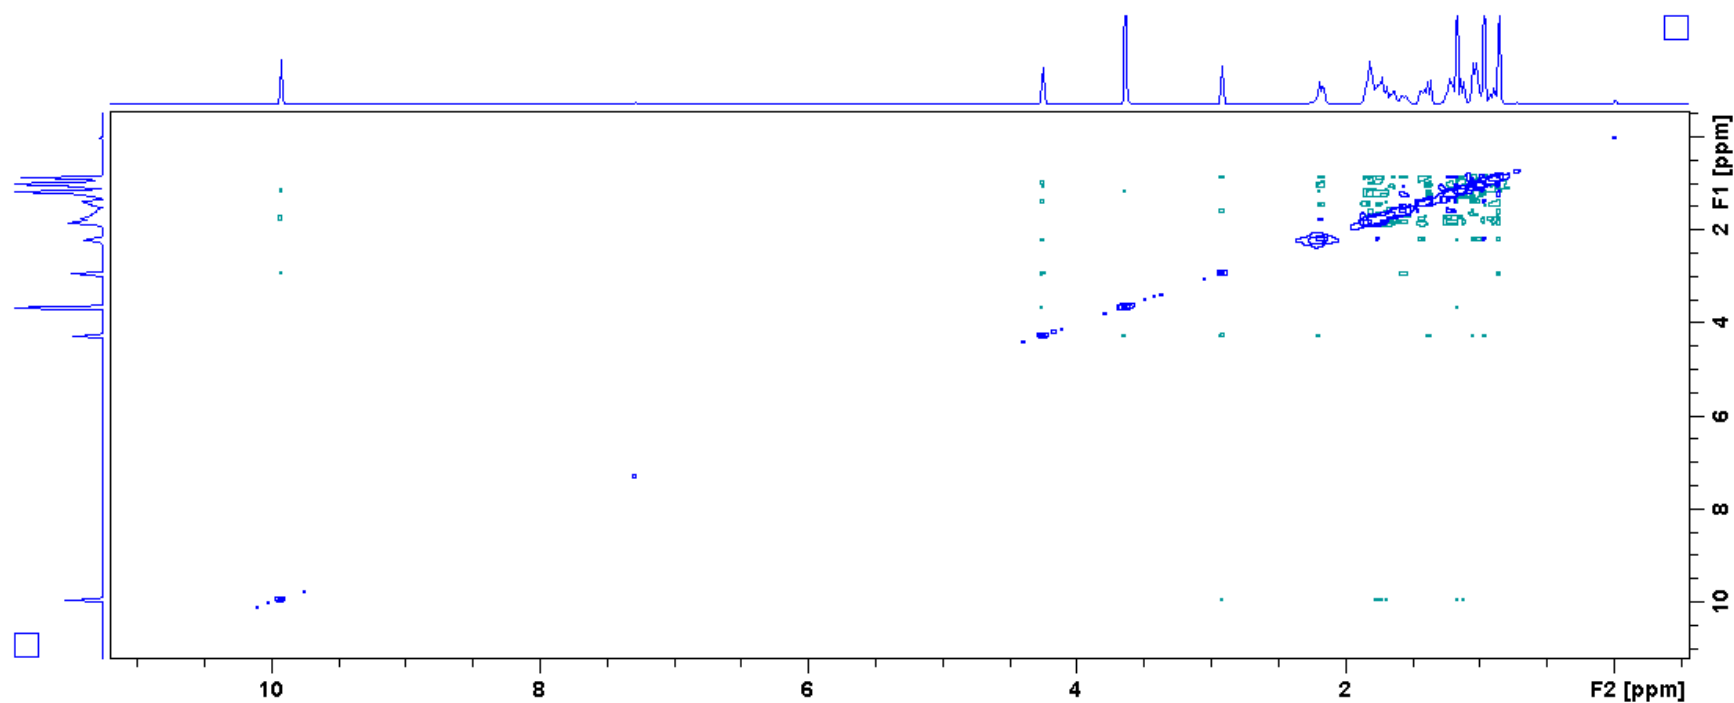

HSQC of compound (4*R*,6*aS*,8*R*,9*S*,11*bS*)-Methyl 7-formyl-8-hydroxy-4,9,11*b*-trimethyltetradecahydro-6*a*,9-methanocyclohepta[*a*]naphthalene-4-carboxylate (**4**)

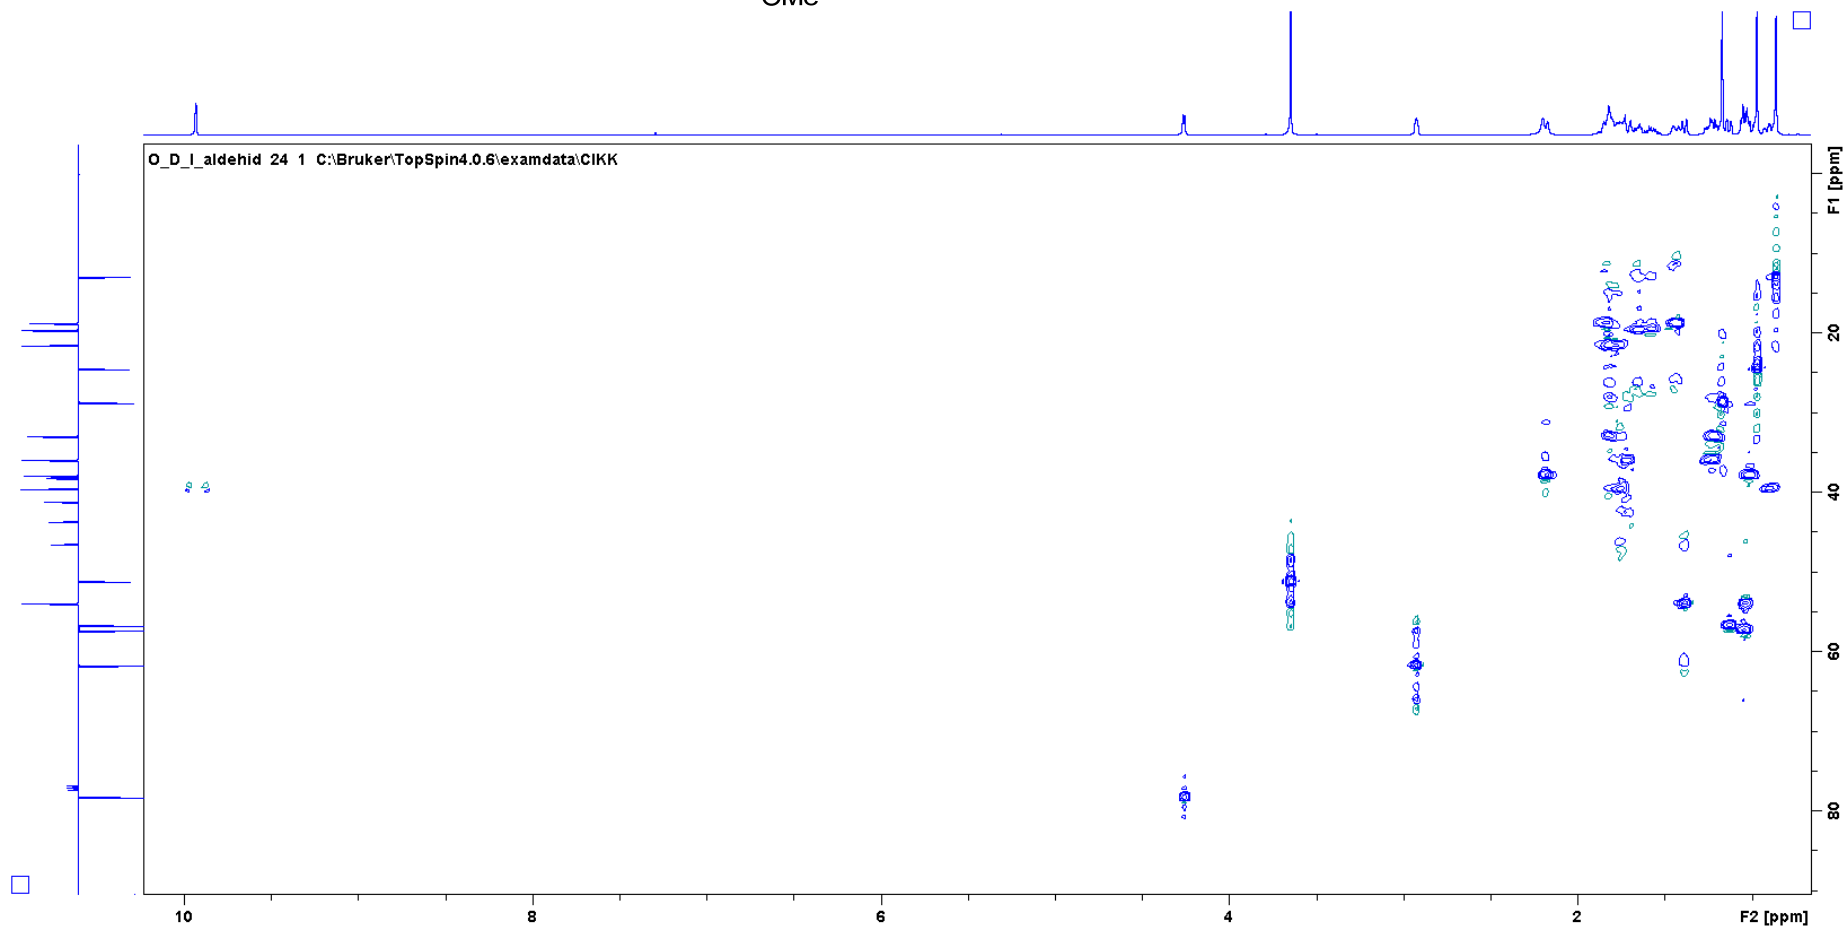

HMBC of compound (4*R*,6*aS*,8*R*,9*S*,11*bS*)-Methyl 7-formyl-8-hydroxy-4,9,11*b*-trimethyltetradecahydro-6*a*,9-methanocyclohepta[*a*]naphthalene-4-carboxylate (**4**)

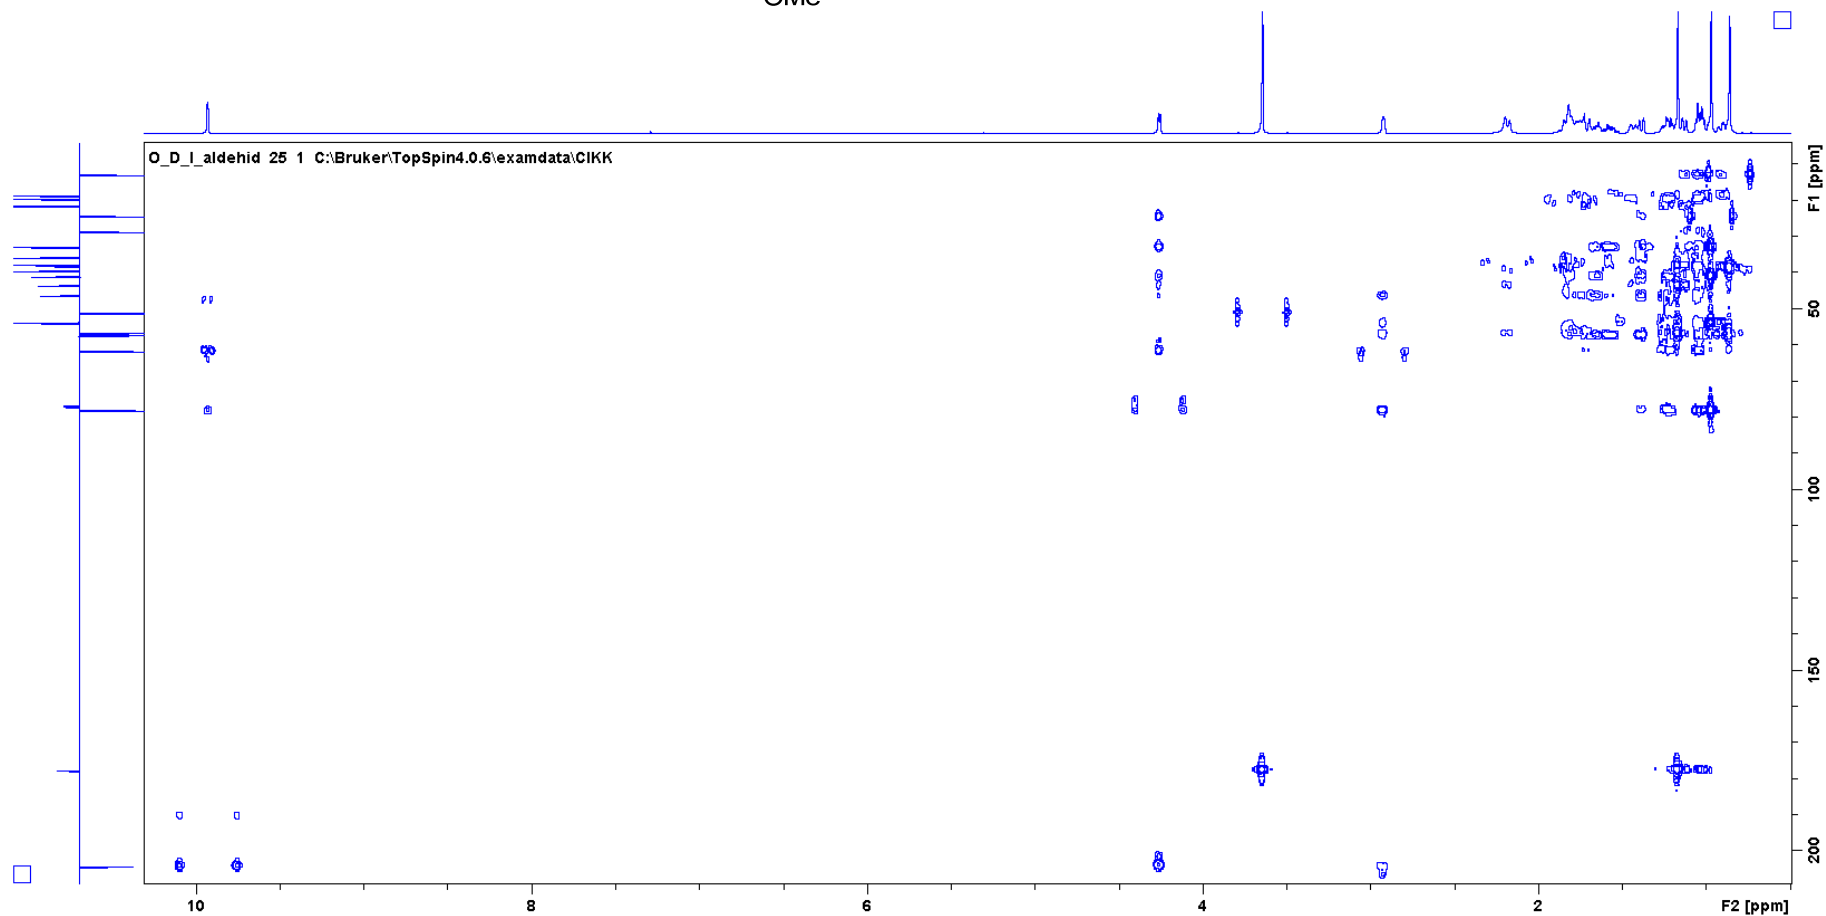



$^1\text{H}$ -NMR of compound (4*R*,6*aS*,8*R*,9*S*,11*bS*)-Methyl 8-hydroxy-7-((hydroxyimino)methyl)-4,9,11*b*-trimethyltetradecahydro-6*a*,9-methanocyclohepta[*a*]naphthalene-4-carboxylate (**5**)

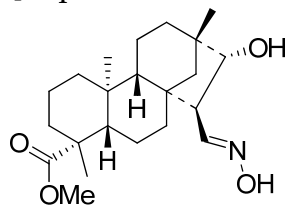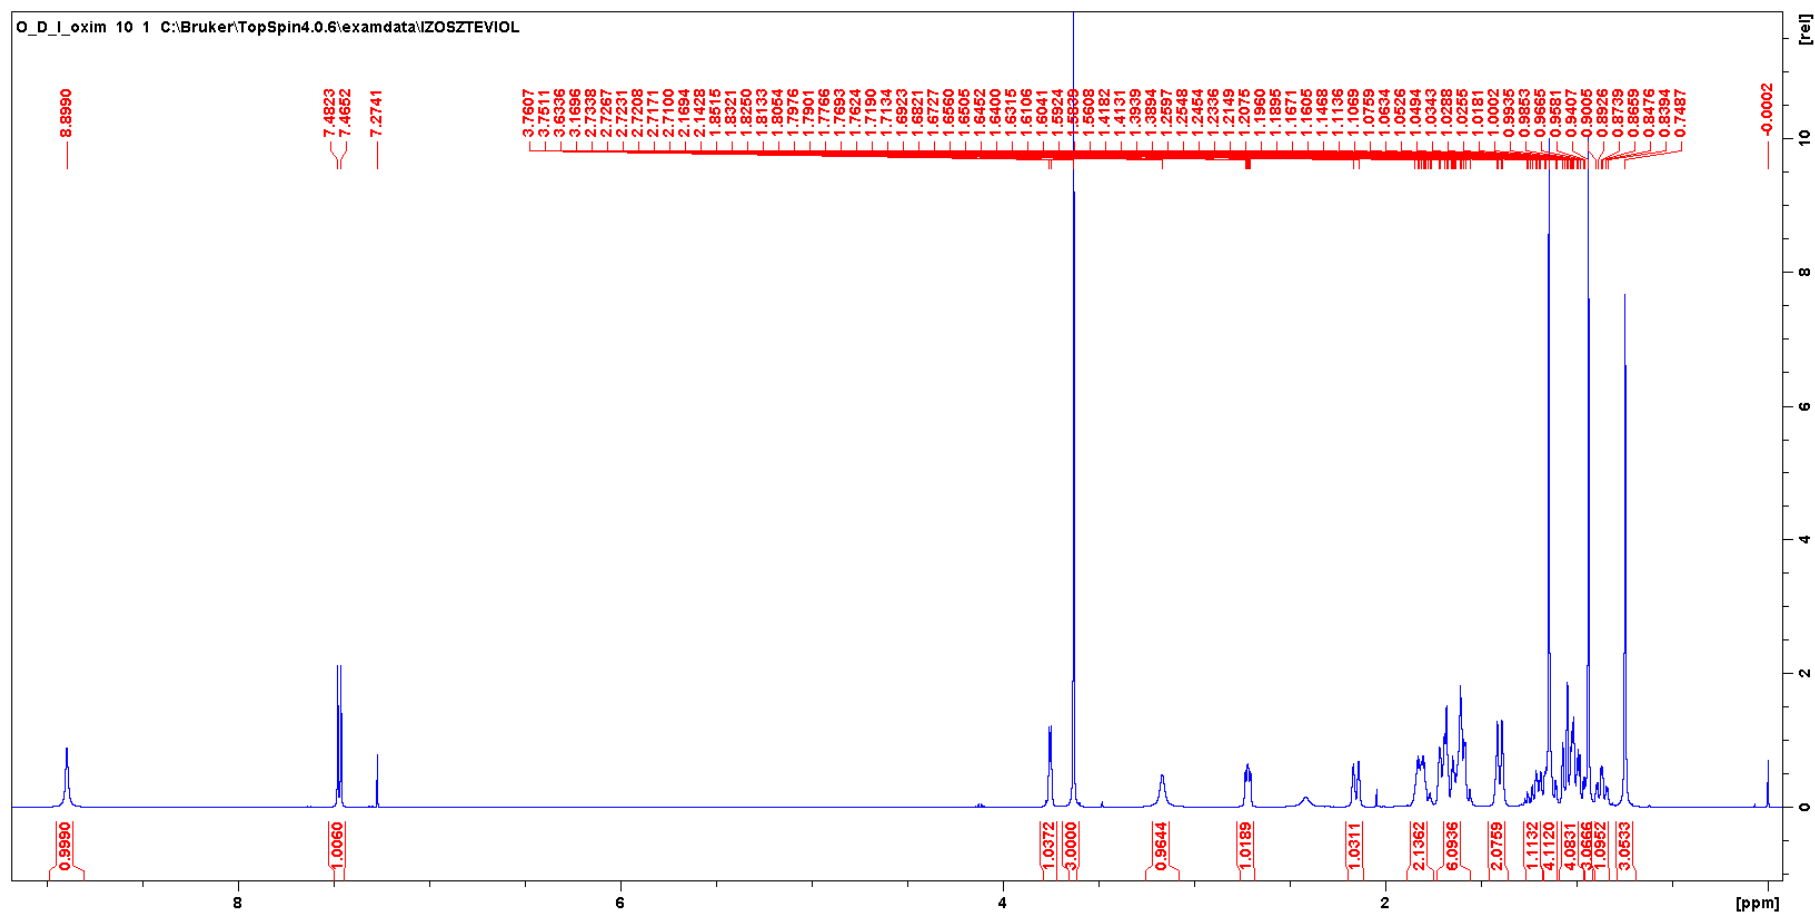

$^{13}\text{C}$ -NMR of compound (4*R*,6*aS*,8*R*,9*S*,11*bS*)-Methyl 8-hydroxy-7-((hydroxyimino)methyl)-4,9,11b-trimethyltetradecahydro-6*a*,9-methanocyclohepta[*a*]naphthalene-4-carboxylate (5)

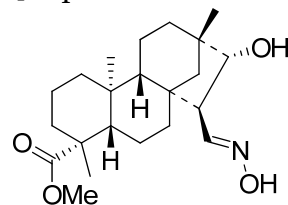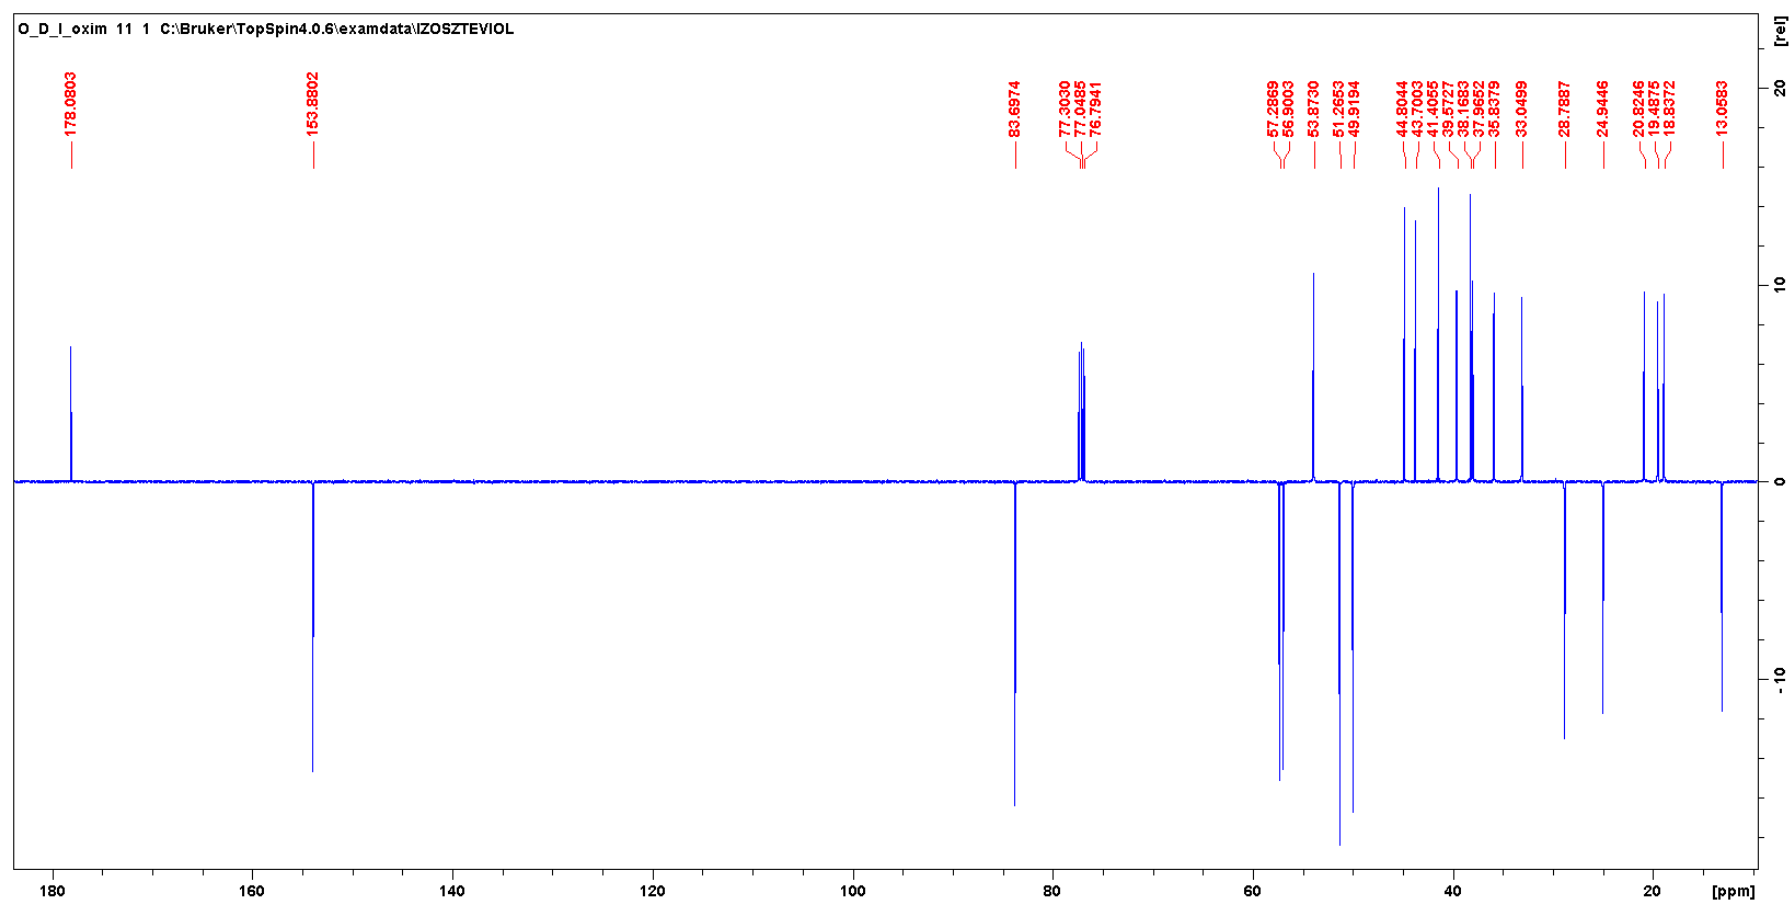

COSY of compound (4*R*,6*aS*,8*R*,9*S*,11*bS*)-Methyl 8-hydroxy-7-((hydroxyimino)methyl)-4,9,11*b*-trimethyltetradecahydro-6*a*,9-methanocyclohepta[*a*]naphthalene-4-carboxylate (**5**)

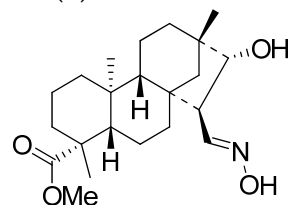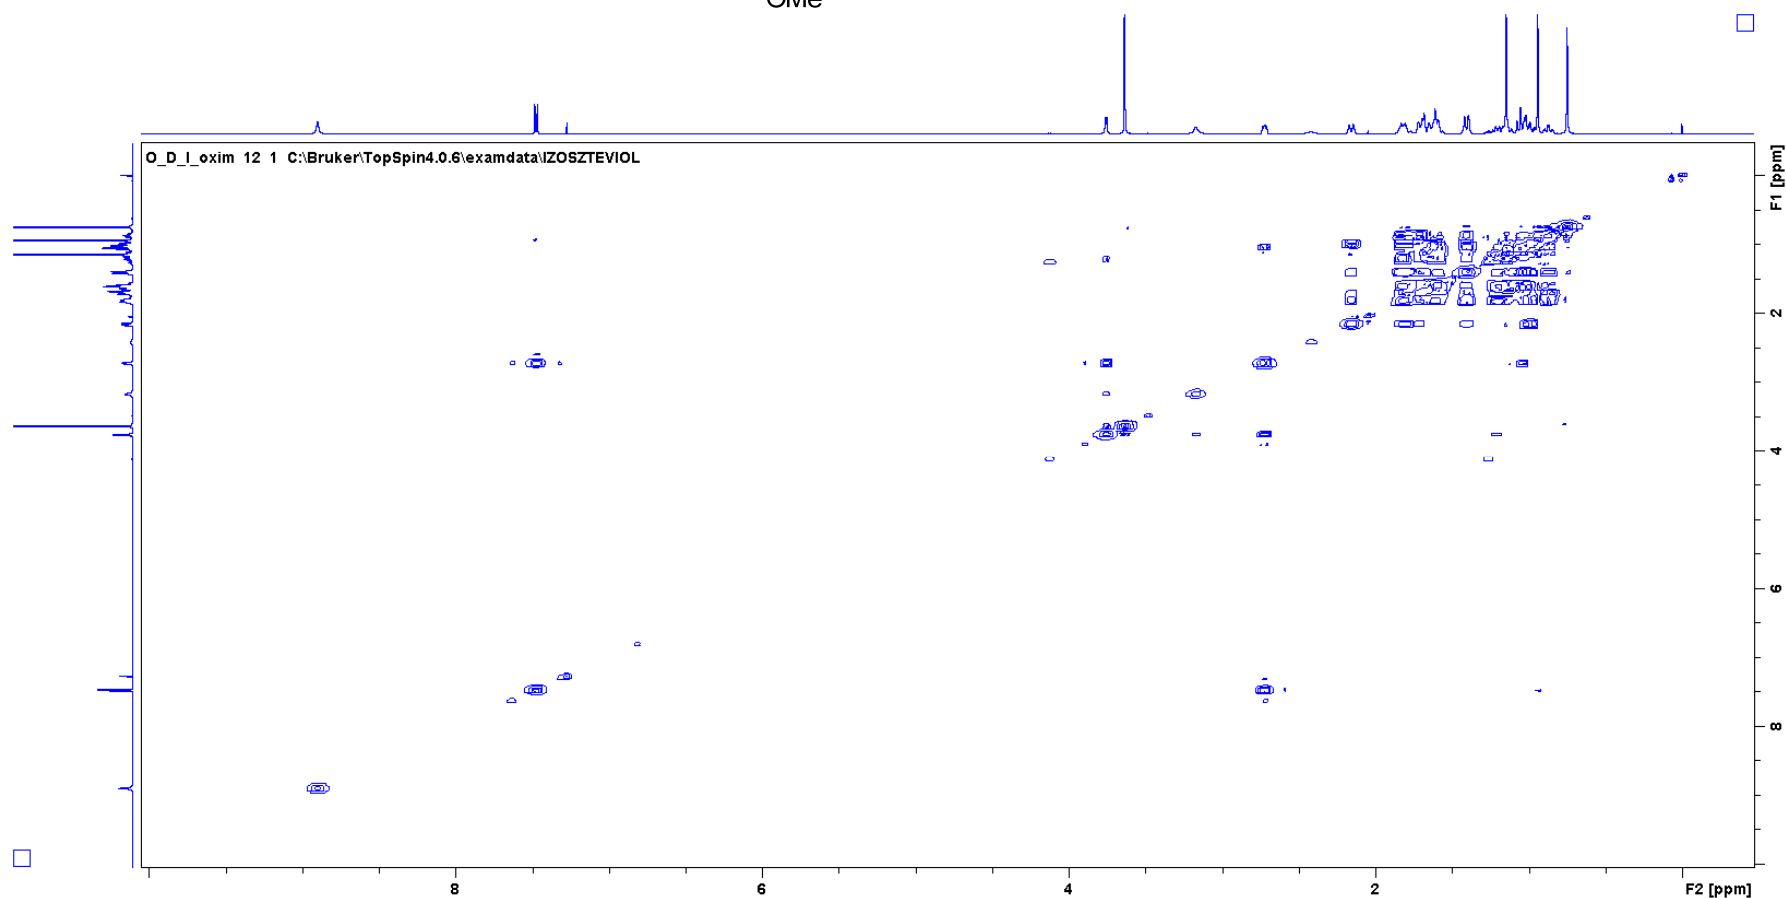

NOESY of compound (4*R*,6*aS*,8*R*,9*S*,11*bS*)-Methyl 8-hydroxy-7-((hydroxyimino)methyl)-4,9,11*b*-trimethyltetradecahydro-6*a*,9-methanocyclohepta[*a*]naphthalene-4-carboxylate (**5**)

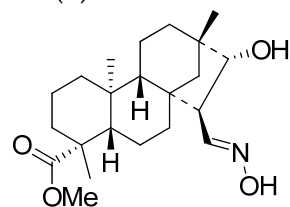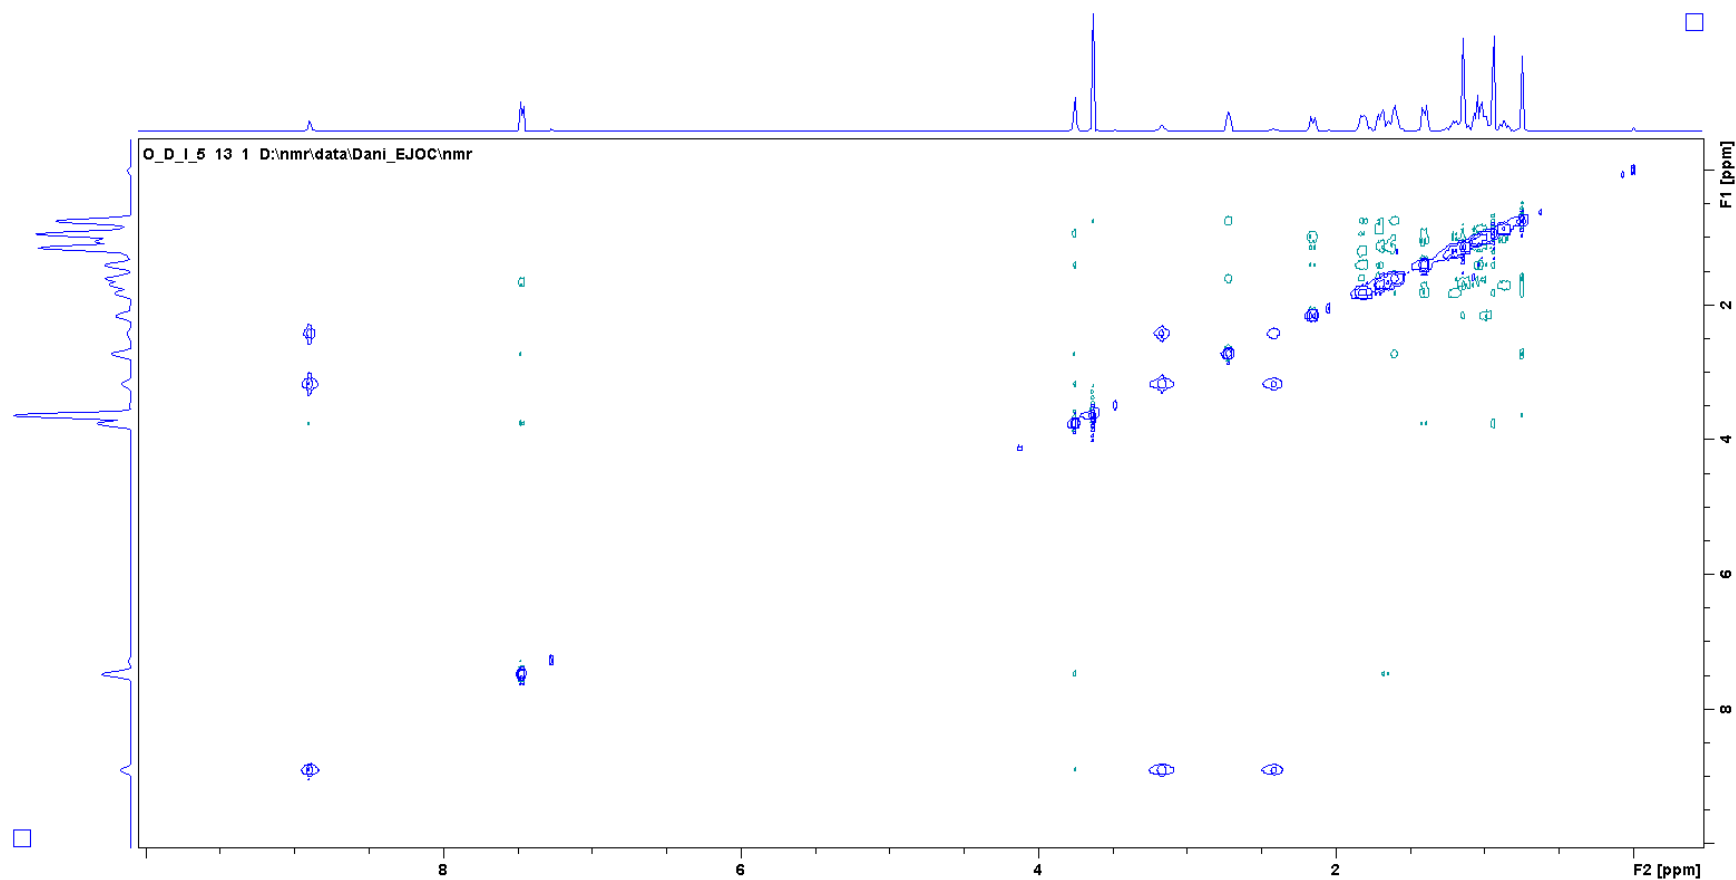

HSQC of compound (4*R*,6*aS*,8*R*,9*S*,11*bS*)-Methyl 8-hydroxy-7-((hydroxyimino)methyl)-4,9,11*b*-trimethyltetradecahydro-6*a*,9-methanocyclohepta[*a*]naphthalene-4-carboxylate (**5**)

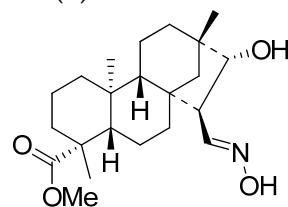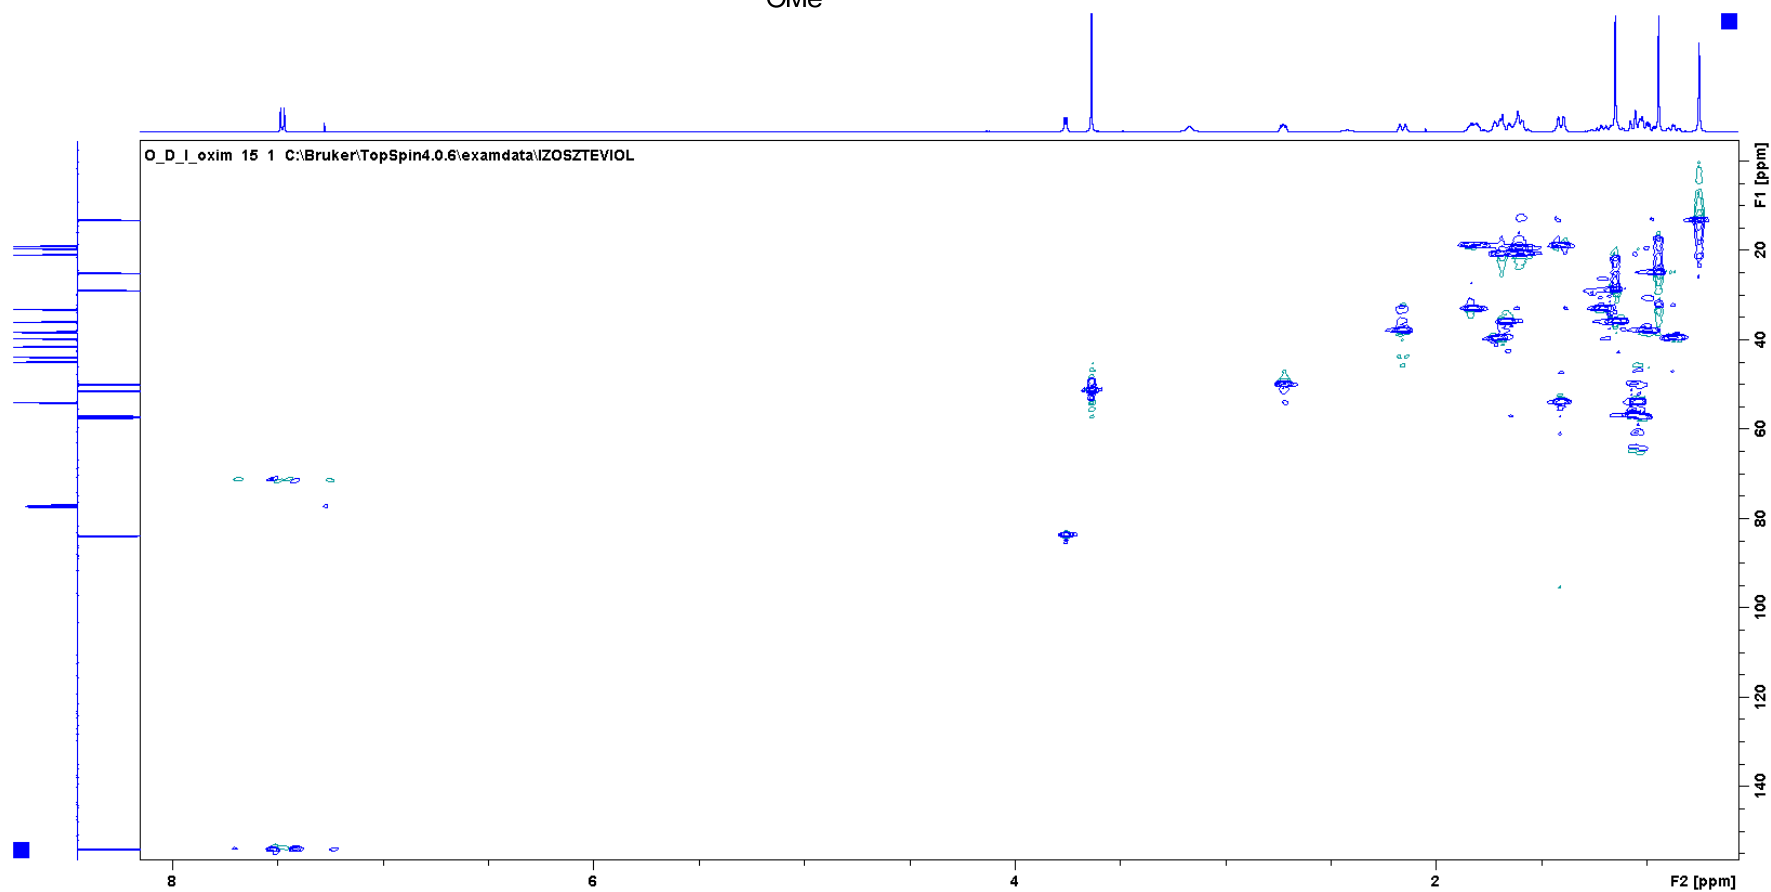

HMBC of compound (4*R*,6*aS*,8*R*,9*S*,11*bS*)-Methyl 8-hydroxy-7-((hydroxyimino)methyl)-4,9,11*b*-trimethyltetradecahydro-6*a*,9-methanocyclohepta[*a*]naphthalene-4-carboxylate (**5**)

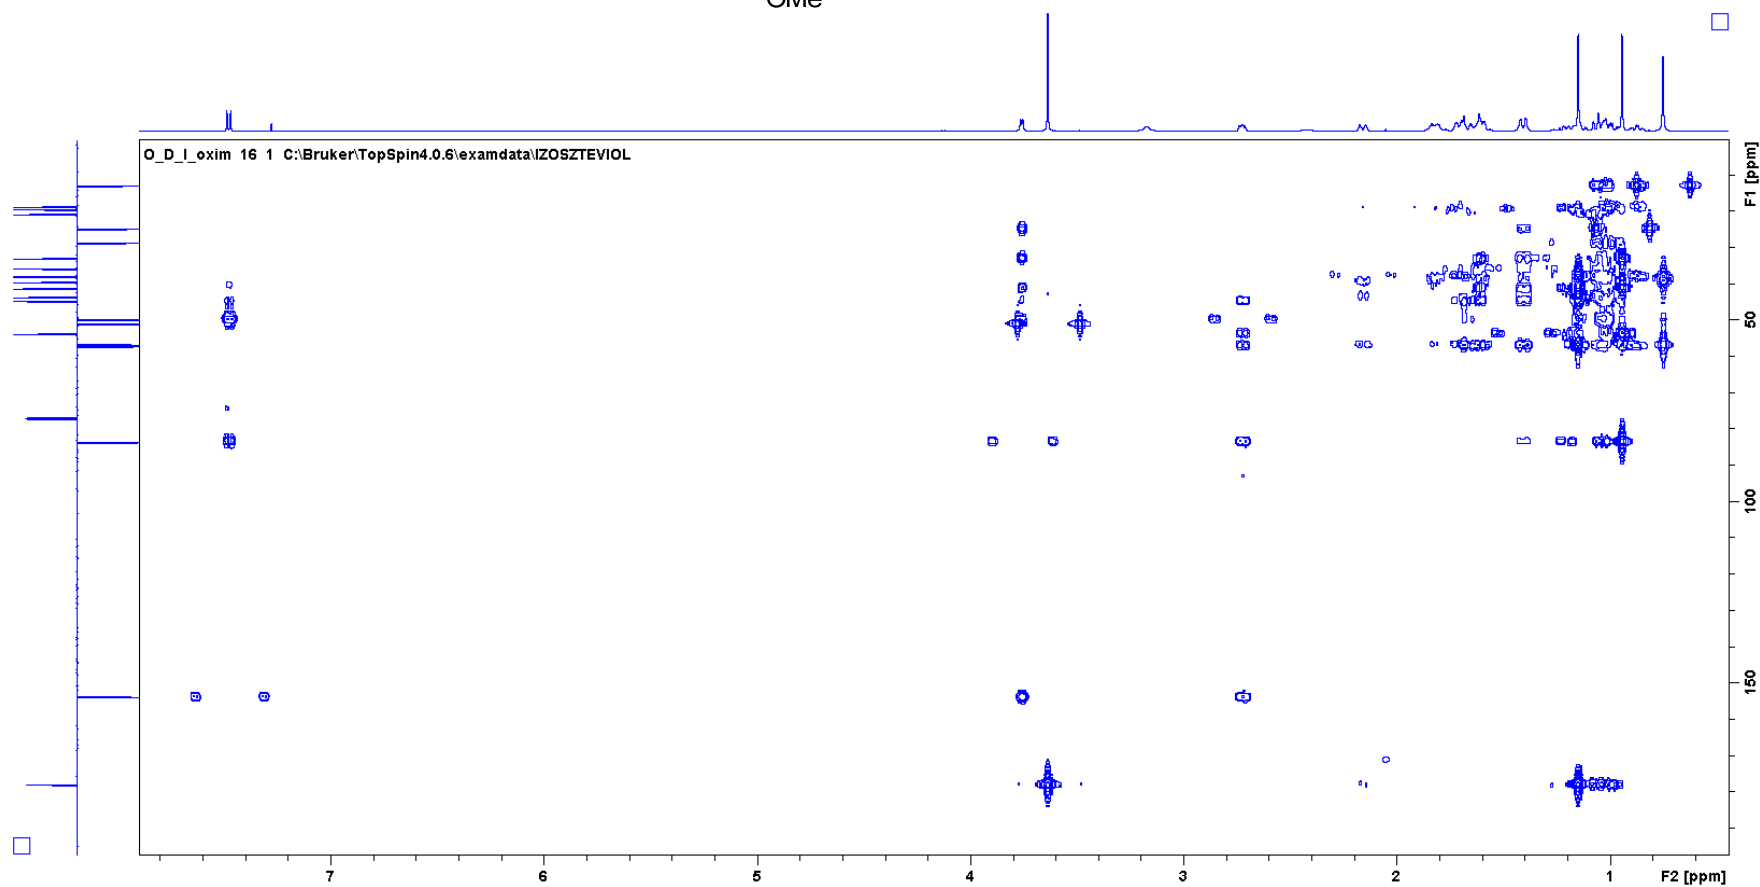

$^1\text{H}$ -NMR of compound (4*R*,6*aS*,8*R*,9*S*,11*bS*)-Methyl 7-aminomethyl-8-hydroxy-4,9,11*b*-trimethyltetradecahydro-6*a*,9-methanocyclohepta[*a*]naphthalene-4-carboxylate (**6**)

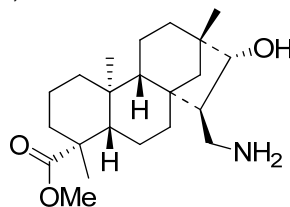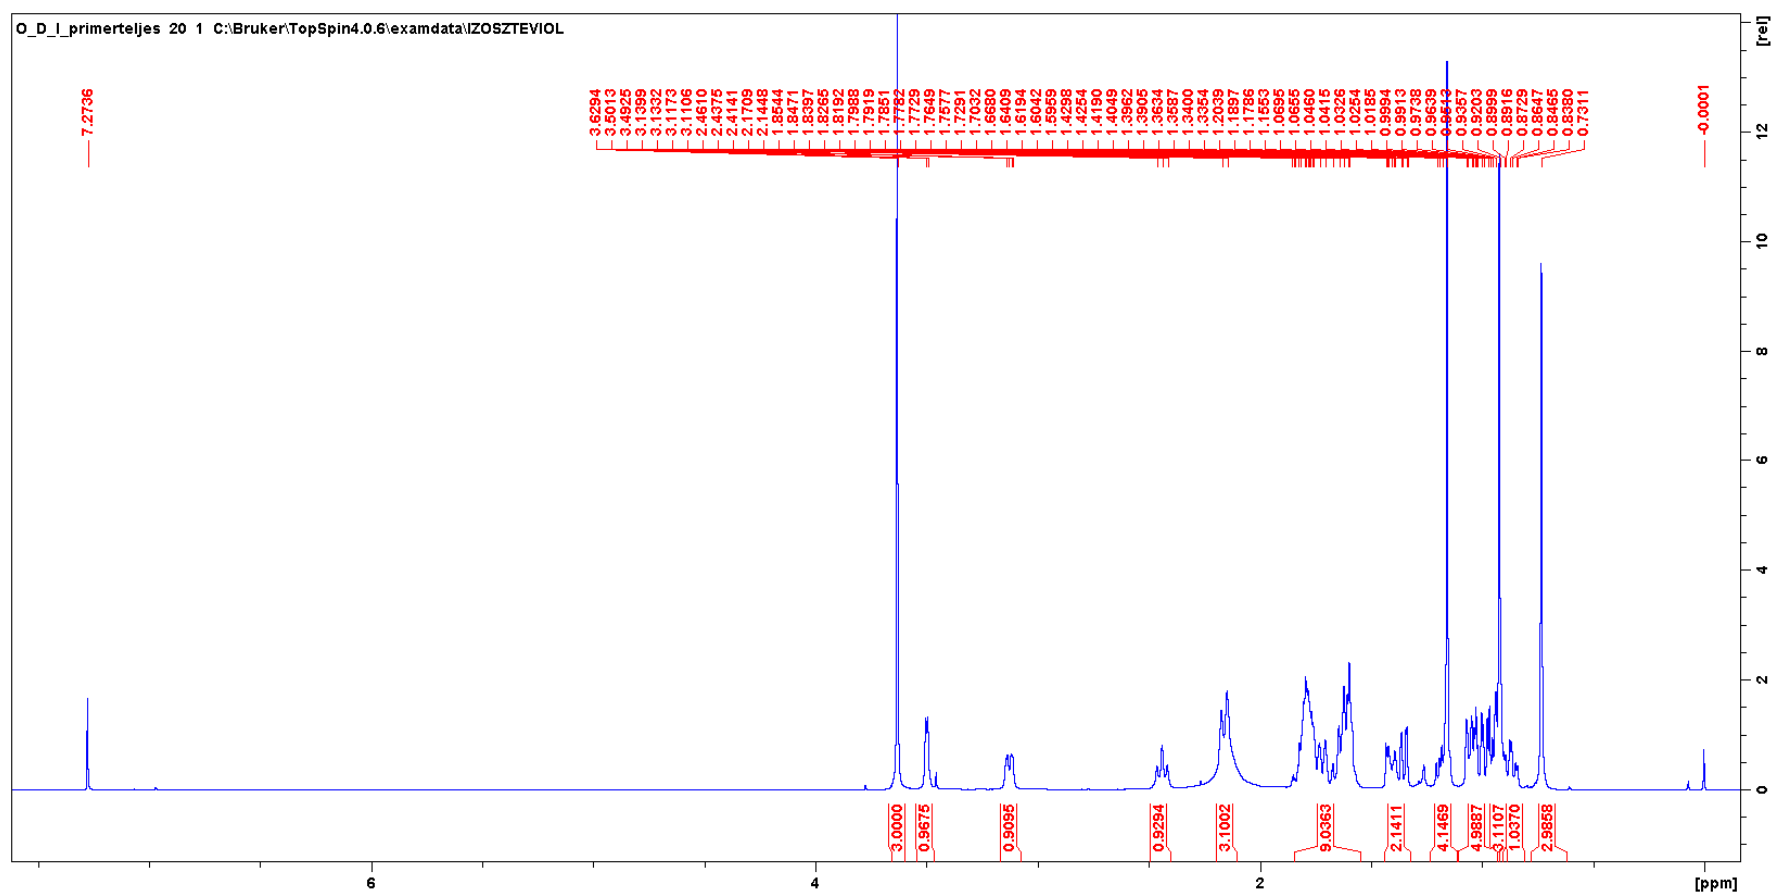

$^{13}\text{C}$ -NMR of compound (4*R*,6*aS*,8*R*,9*S*,11*bS*)-Methyl 7-aminomethyl-8-hydroxy-4,9,11*b*-trimethyltetradecahydro-6*a*,9-methanocyclohepta[*a*]naphthalene-4-carboxylate (**6**)

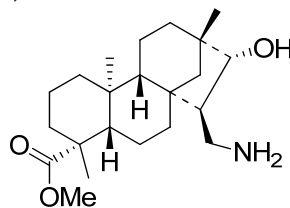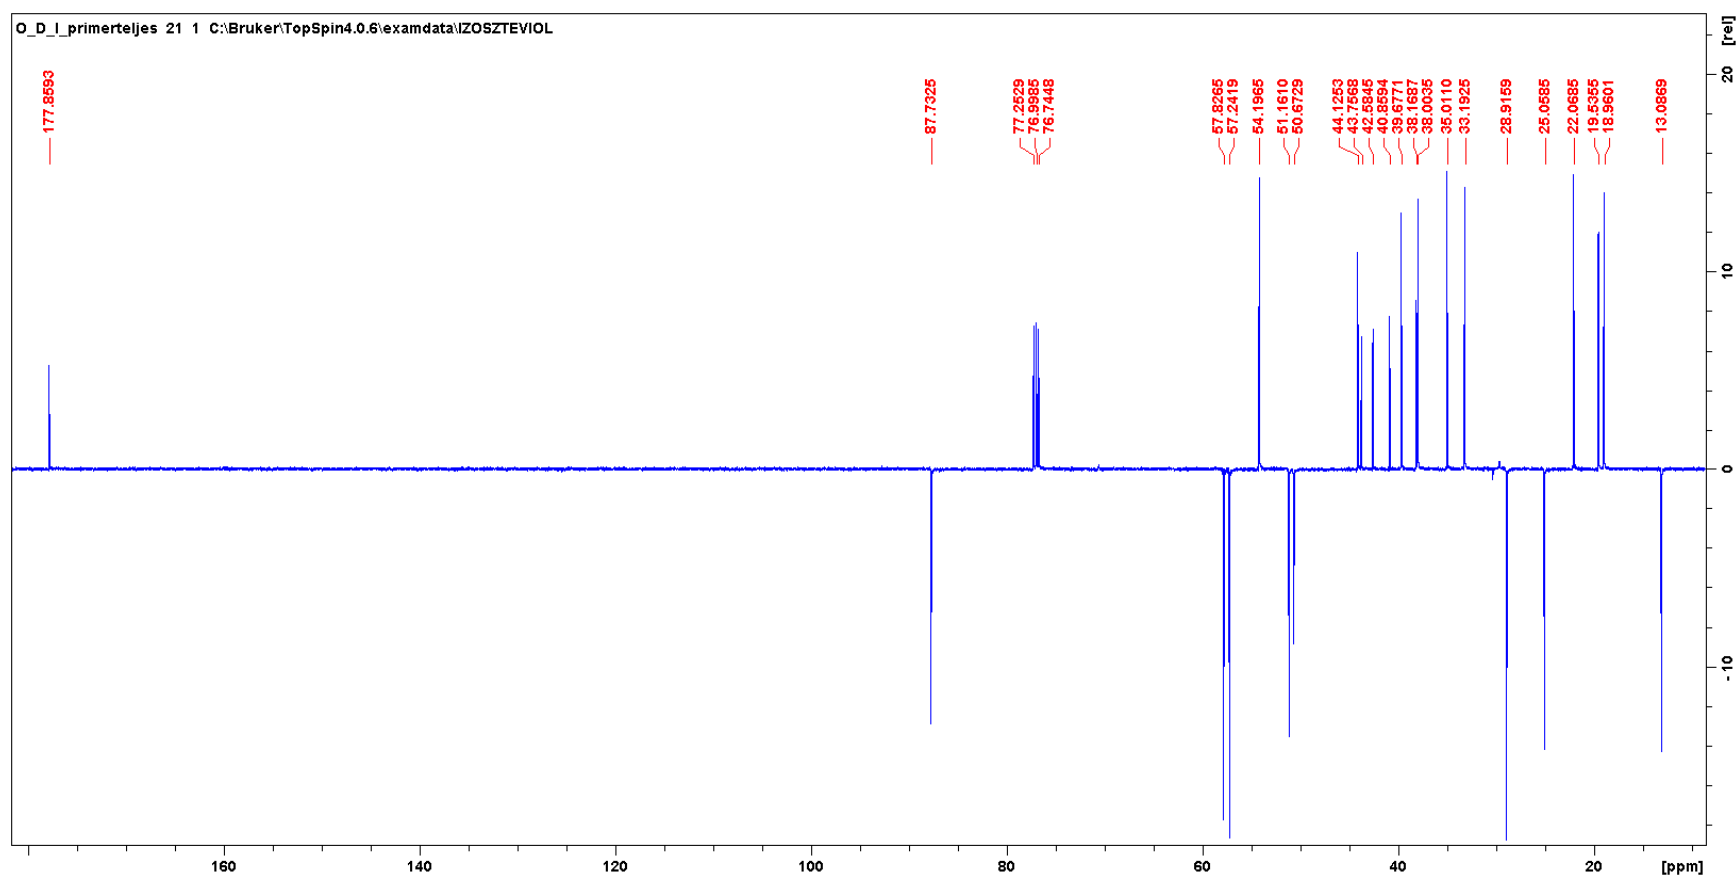



COSY of compound (4*R*,6*aS*,8*R*,9*S*,11*bS*)-Methyl 7-aminomethyl-8-hydroxy-4,9,11*b*-trimethyltetradecahydro-6*a*,9-methanocyclohepta[*a*]naphthalene-4-carboxylate (**6**)

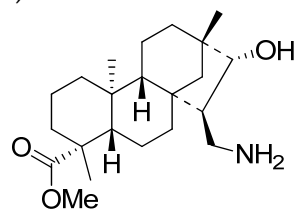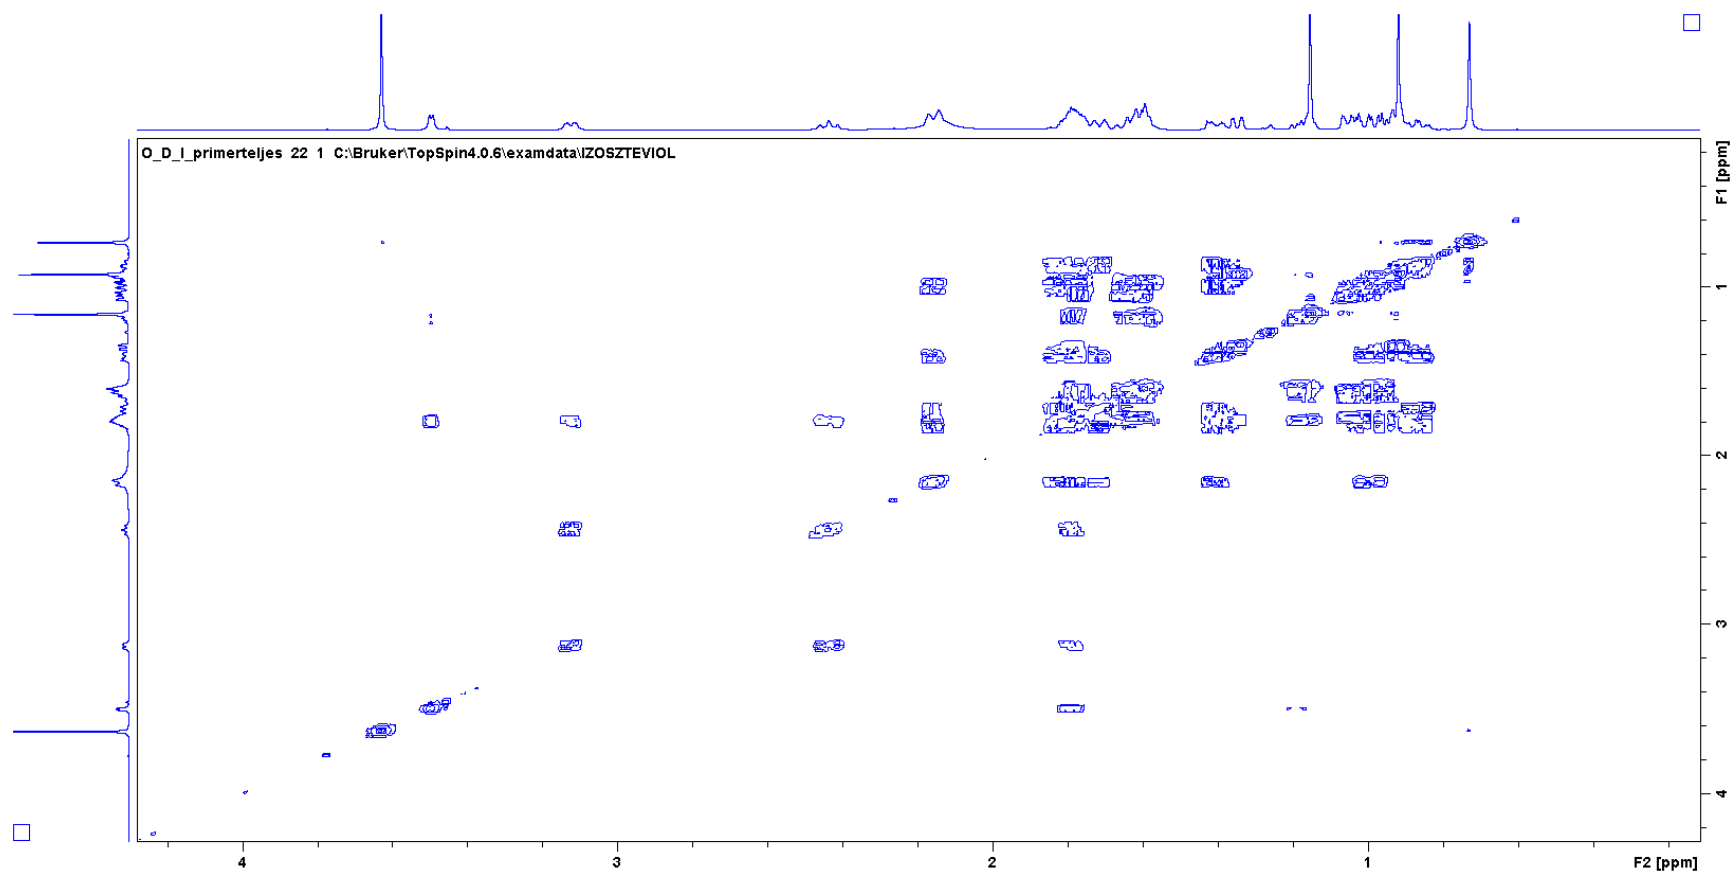

HSQC of compound (4*R*,6*aS*,8*R*,9*S*,11*bS*)-Methyl 7-aminomethyl-8-hydroxy-4,9,11*b*-trimethyltetradecahydro-6*a*,9-methanocyclohepta[*a*]naphthalene-4-carboxylate (**6**)

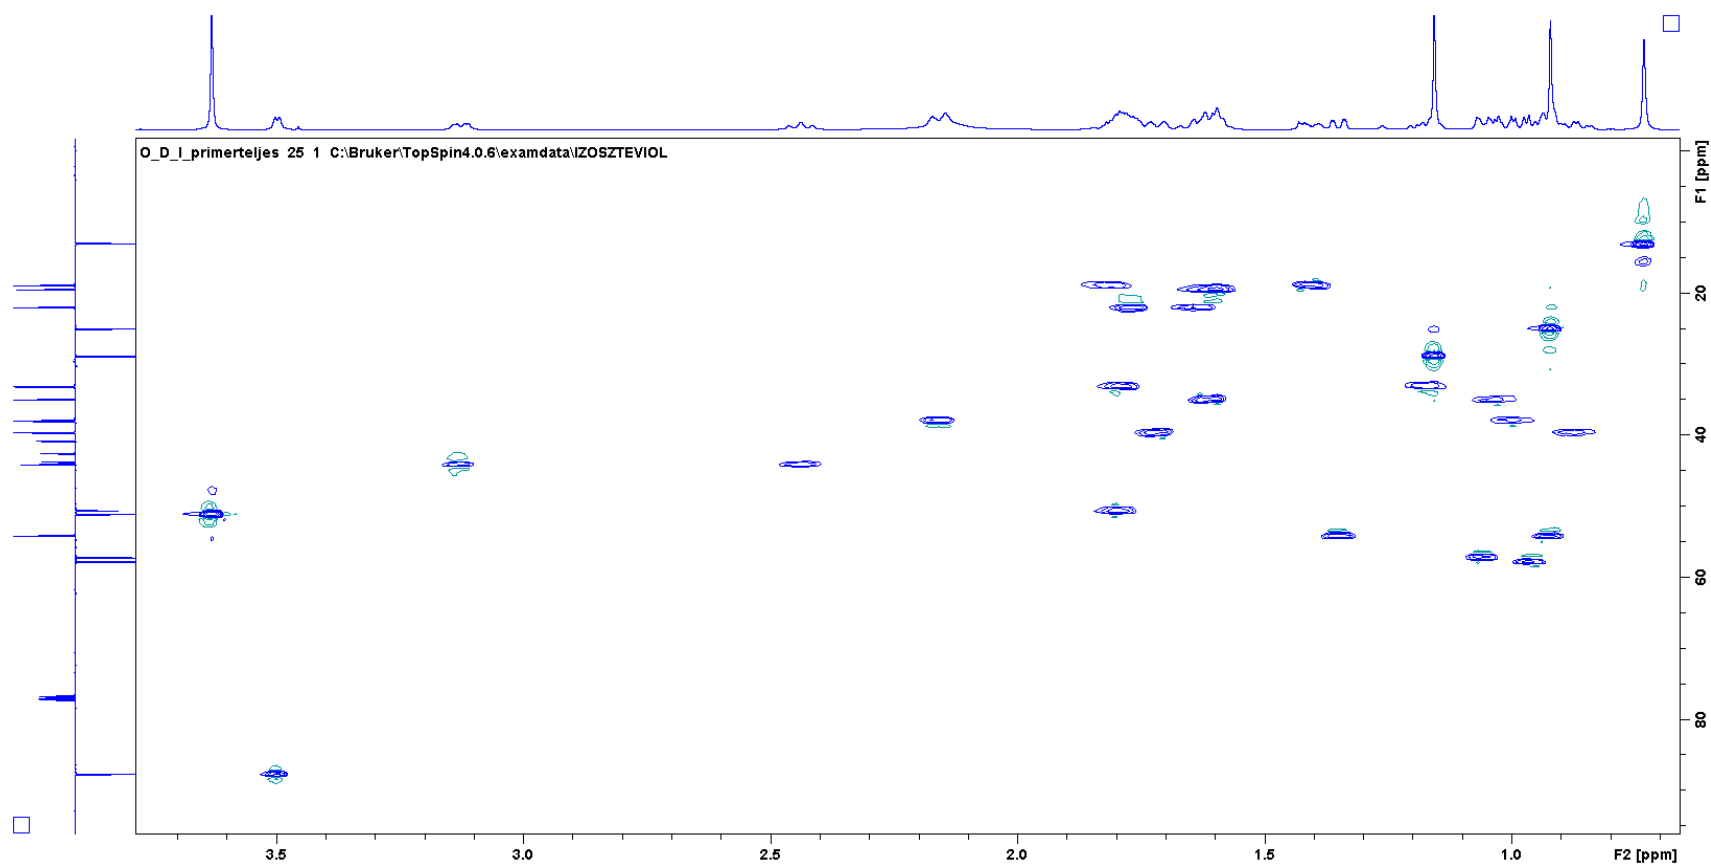

HMBC of compound (4*R*,6*aS*,8*R*,9*S*,11*bS*)-Methyl 7-aminomethyl-8-hydroxy-4,9,11*b*-trimethyltetradecahydro-6*a*,9-methanocyclohepta[*a*]naphthalene-4-carboxylate (**6**)

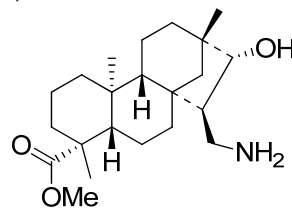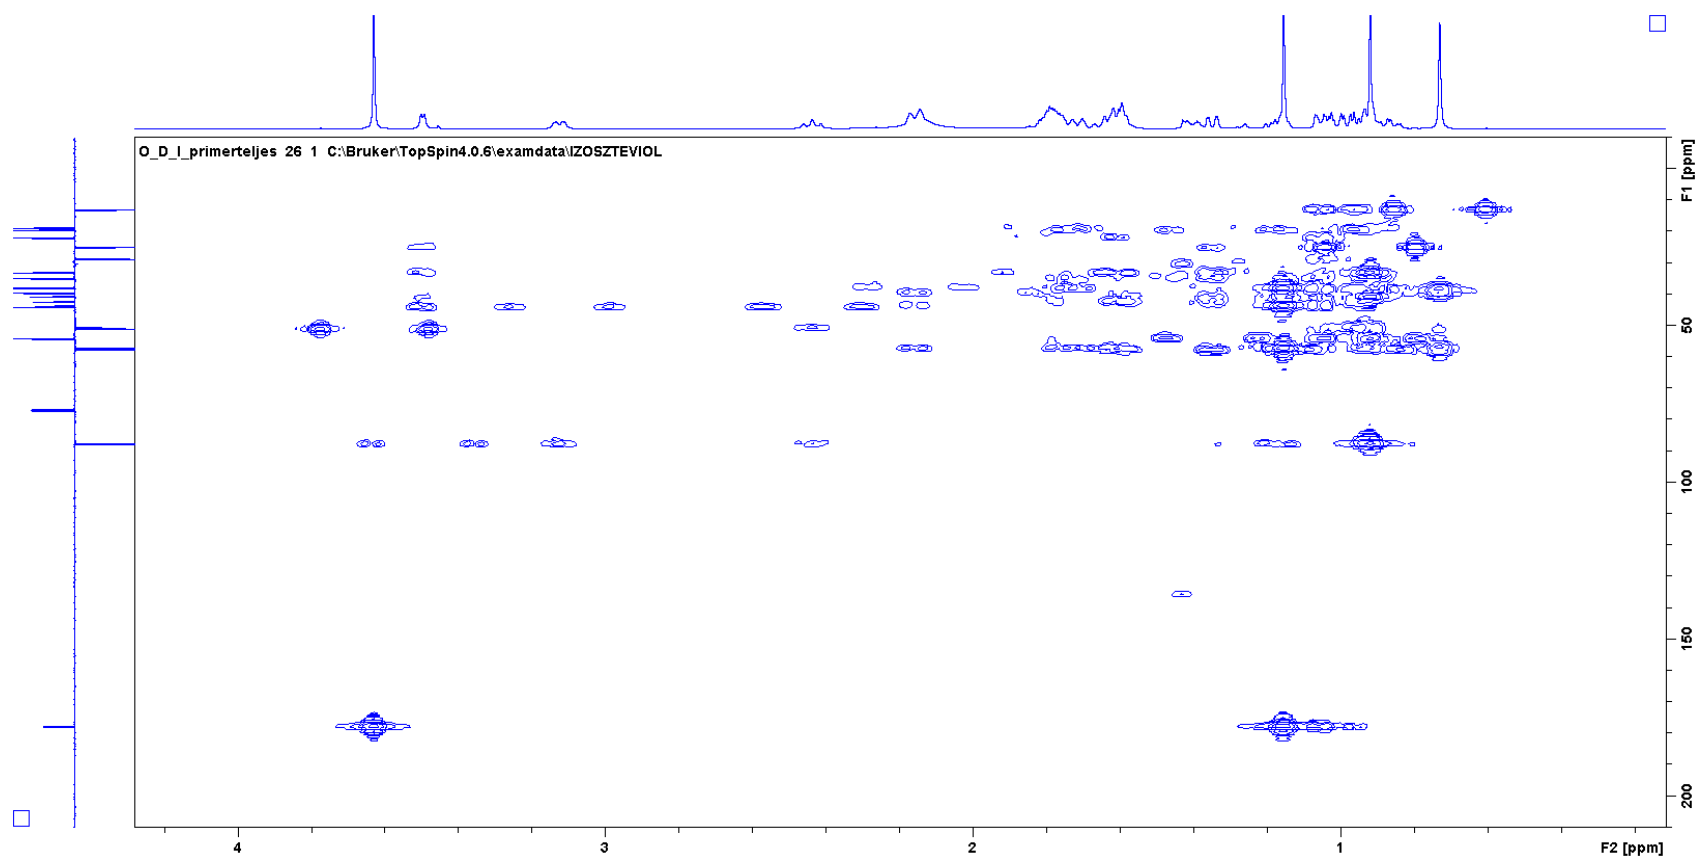

$^1\text{H}$ -NMR of compound (4*R*,6*aS*,8*R*,9*S*,11*bS*)-Methyl 8-hydroxy-4,9,11*b*-trimethyl-7-((methylamino)methyl)tetradecahydro-6*a*,9-methanocyclohepta[*a*]naphthalene-4-carboxylate (**7**)

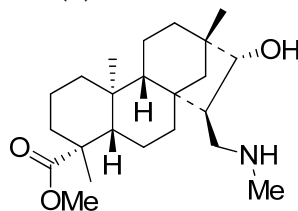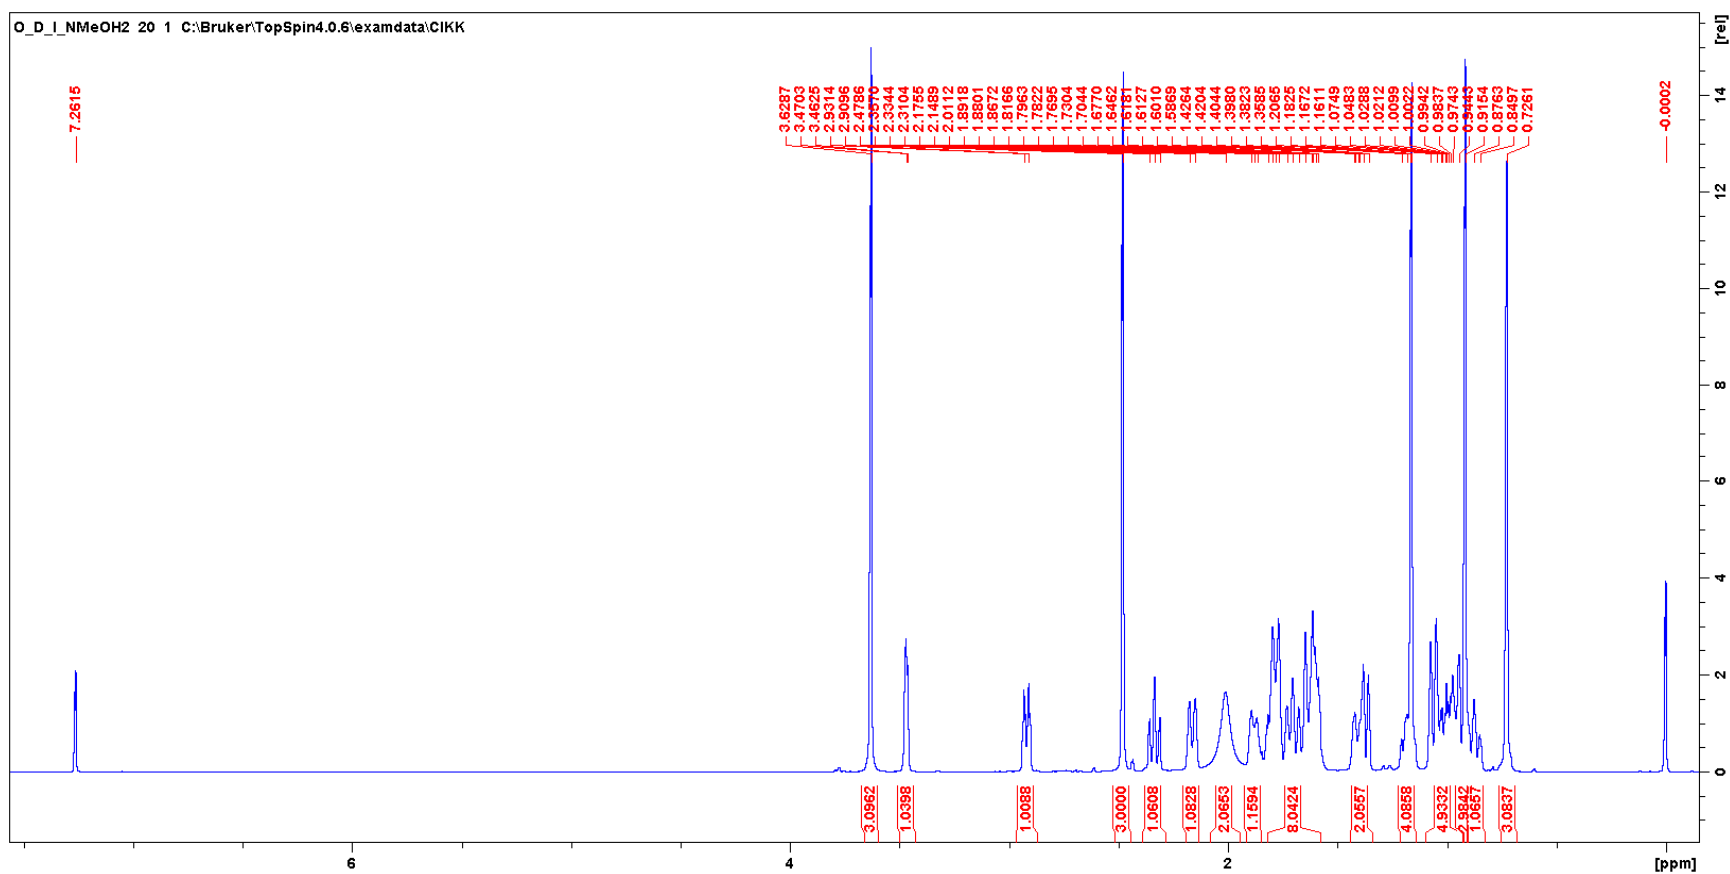

$^{13}\text{C}$ -NMR of compound (4*R*,6*aS*,8*R*,9*S*,11*bS*)-Methyl 8-hydroxy-4,9,11*b*-trimethyl-7-((methylamino)methyl)tetradecahydro-6*a*,9-methanocyclohepta[*a*]naphthalene-4-carboxylate (7)

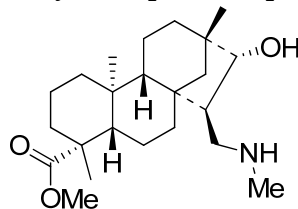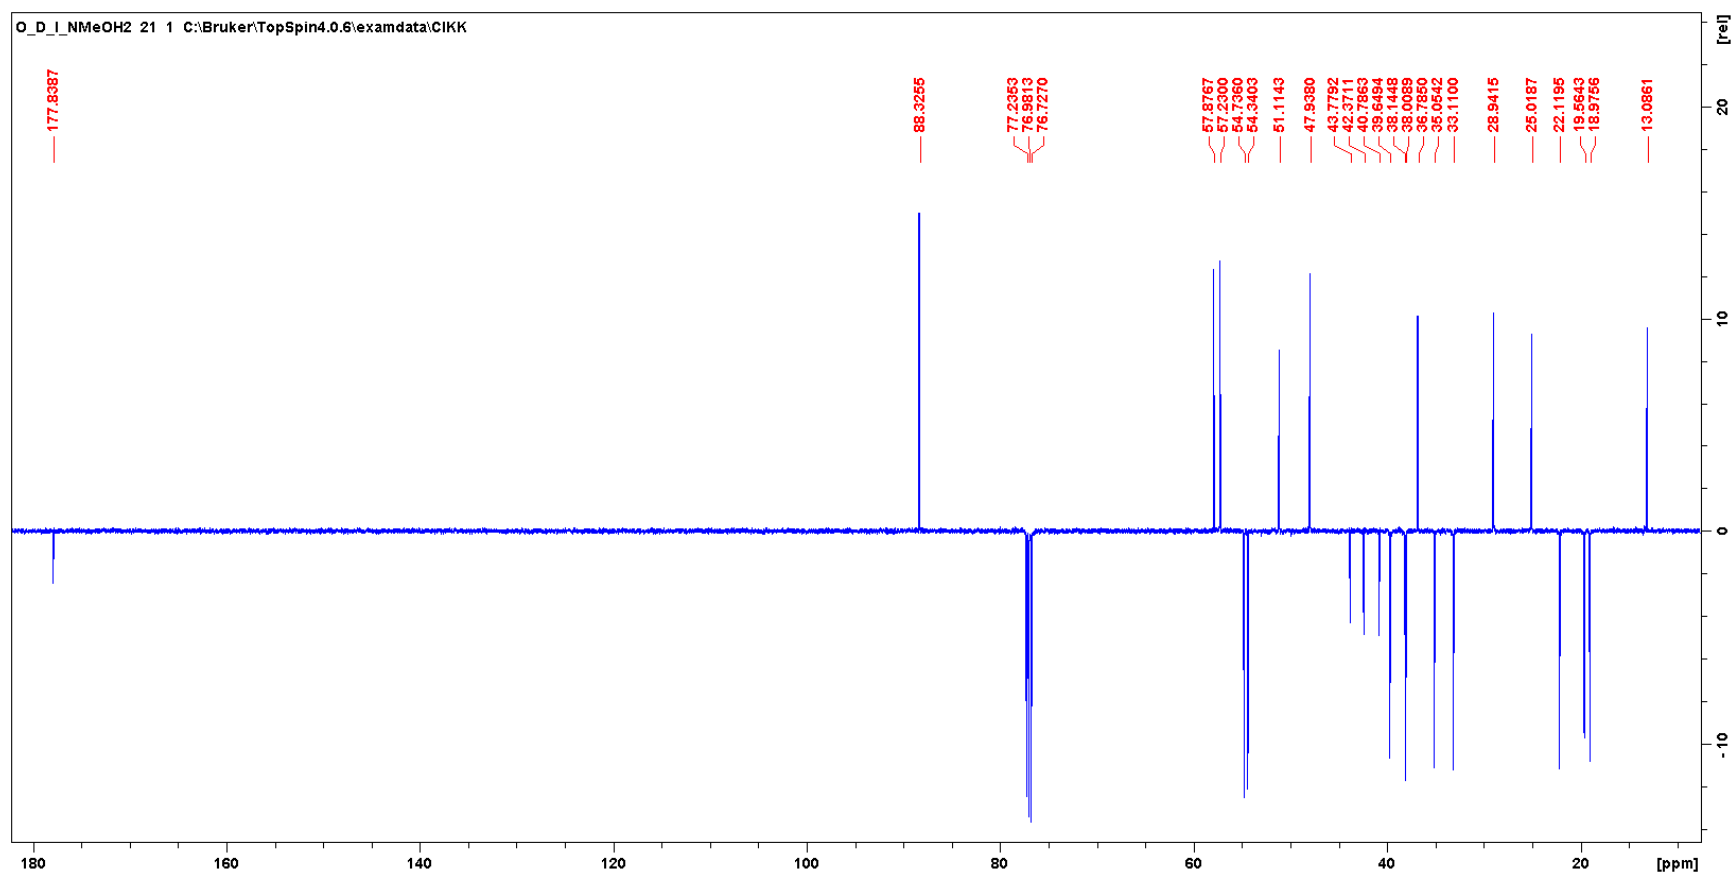

COSY of compound (4*R*,6*aS*,8*R*,9*S*,11*bS*)-Methyl 8-hydroxy-4,9,11*b*-trimethyl-7-((methylamino)methyl)tetradecahydro-6*a*,9-methanocyclohepta[*a*]naphthalene-4-carboxylate (**7**)

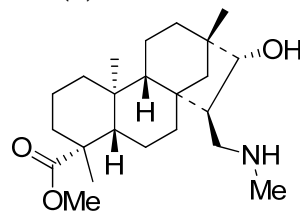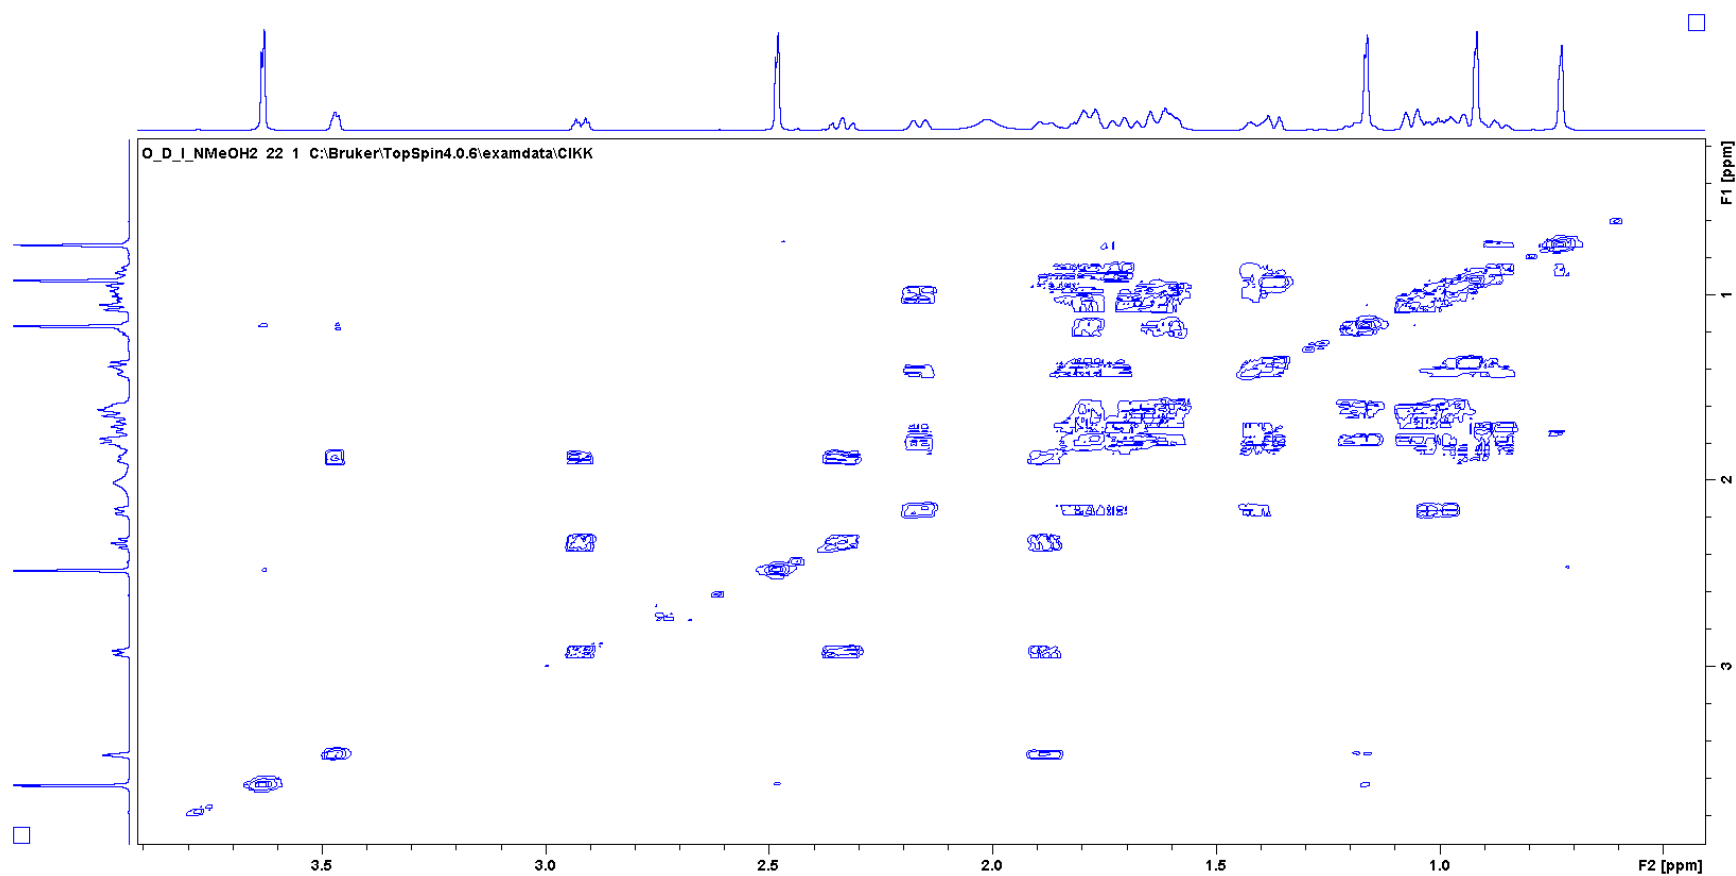

NOESY of compound (4*R*,6*aS*,8*R*,9*S*,11*bS*)-Methyl 8-hydroxy-4,9,11*b*-trimethyl-7-((methylamino)methyl)tetradecahydro-6*a*,9-methanocyclohepta[*a*]naphthalene-4-carboxylate (**7**)

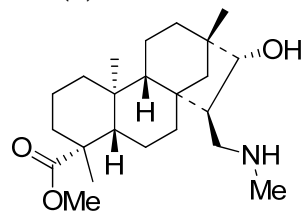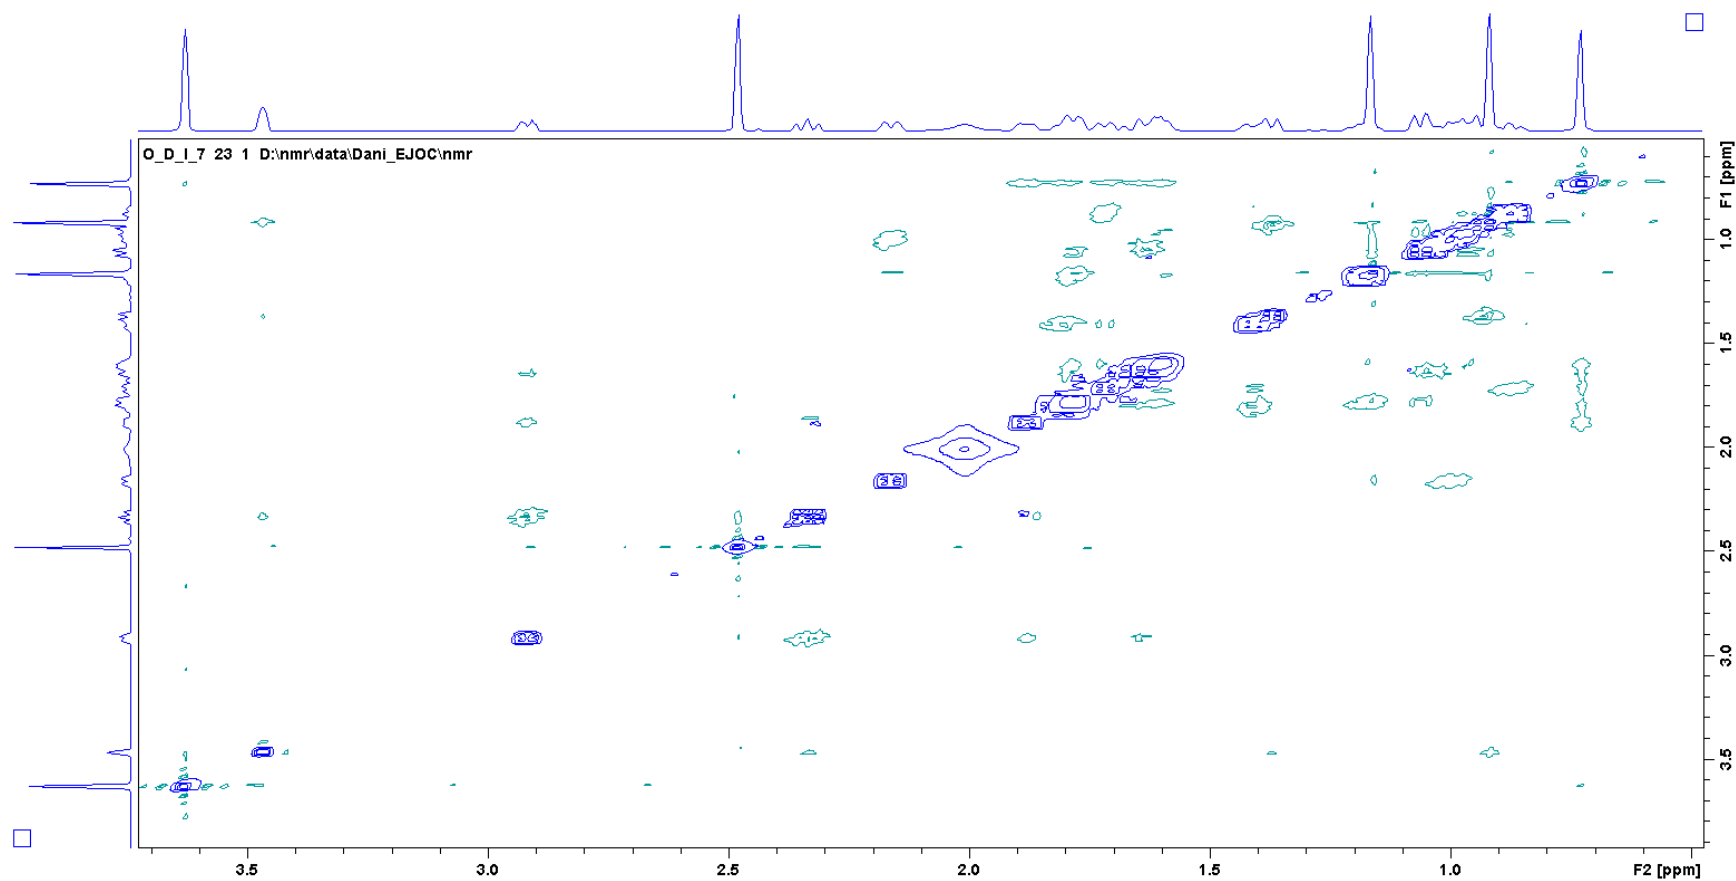

HSQC of compound (4*R*,6*aS*,8*R*,9*S*,11*bS*)-Methyl 8-hydroxy-4,9,11*b*-trimethyl-7-((methylamino)methyl)tetradecahydro-6*a*,9-methanocyclohepta[*a*]naphthalene-4-carboxylate (**7**)

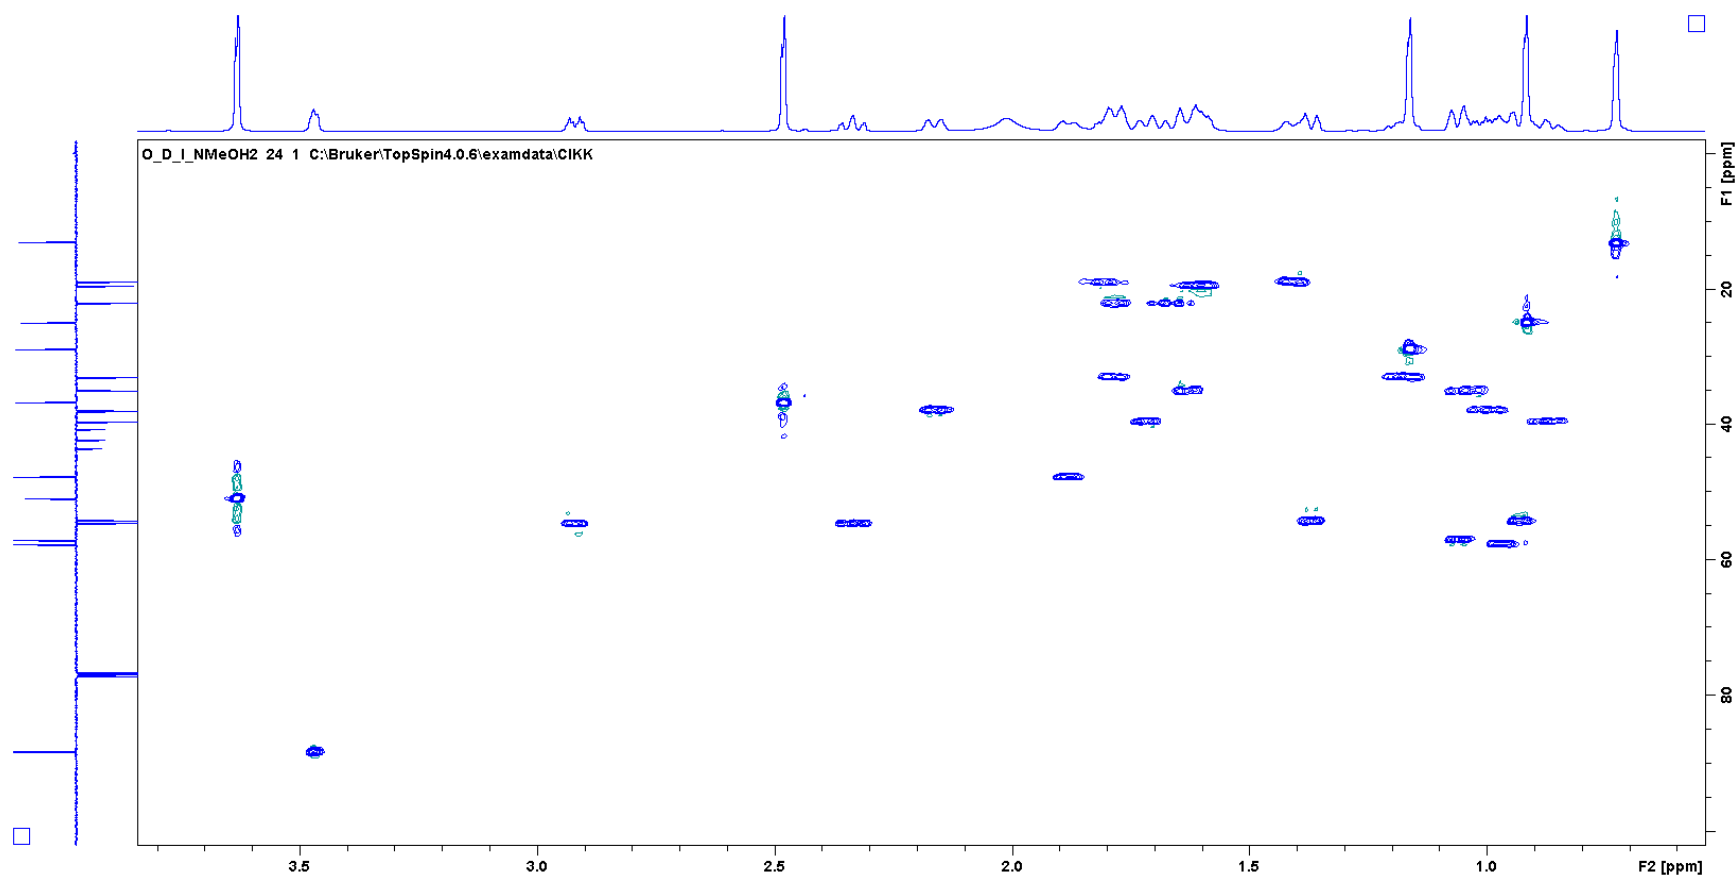



HMBC of compound (4*R*,6*aS*,8*R*,9*S*,11*bS*)-Methyl 8-hydroxy-4,9,11*b*-trimethyl-7-((methylamino)methyl)tetradecahydro-6*a*,9-methanocyclohepta[*a*]naphthalene-4-carboxylate (7)

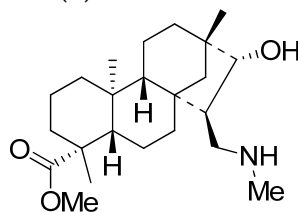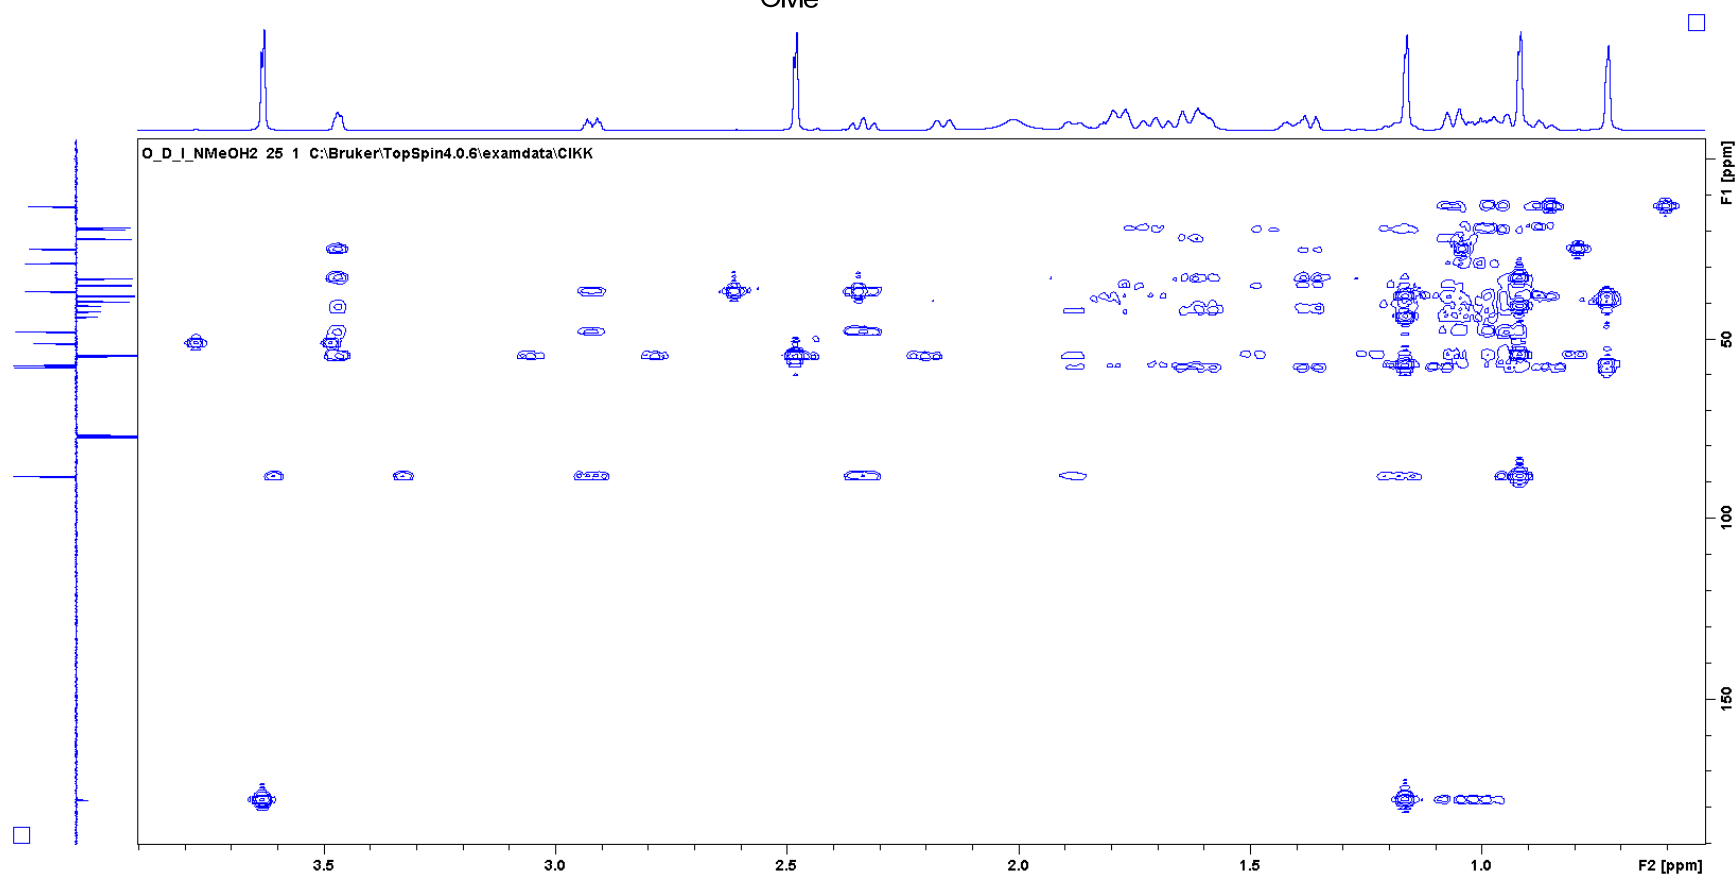

$^1\text{H}$ -NMR of compound (4*R*,6*aS*,8*R*,9*S*,11*bS*)-Methyl 7-((benzylamino)methyl)-8-hydroxy-4,9,11*b*-trimethyltetradecahydro-6*a*,9-methanocyclohepta[*a*]naphthalene-4-carboxylate (**8**)

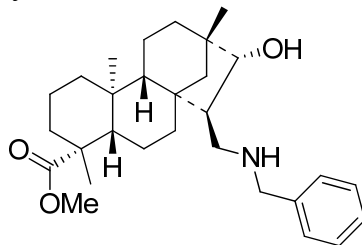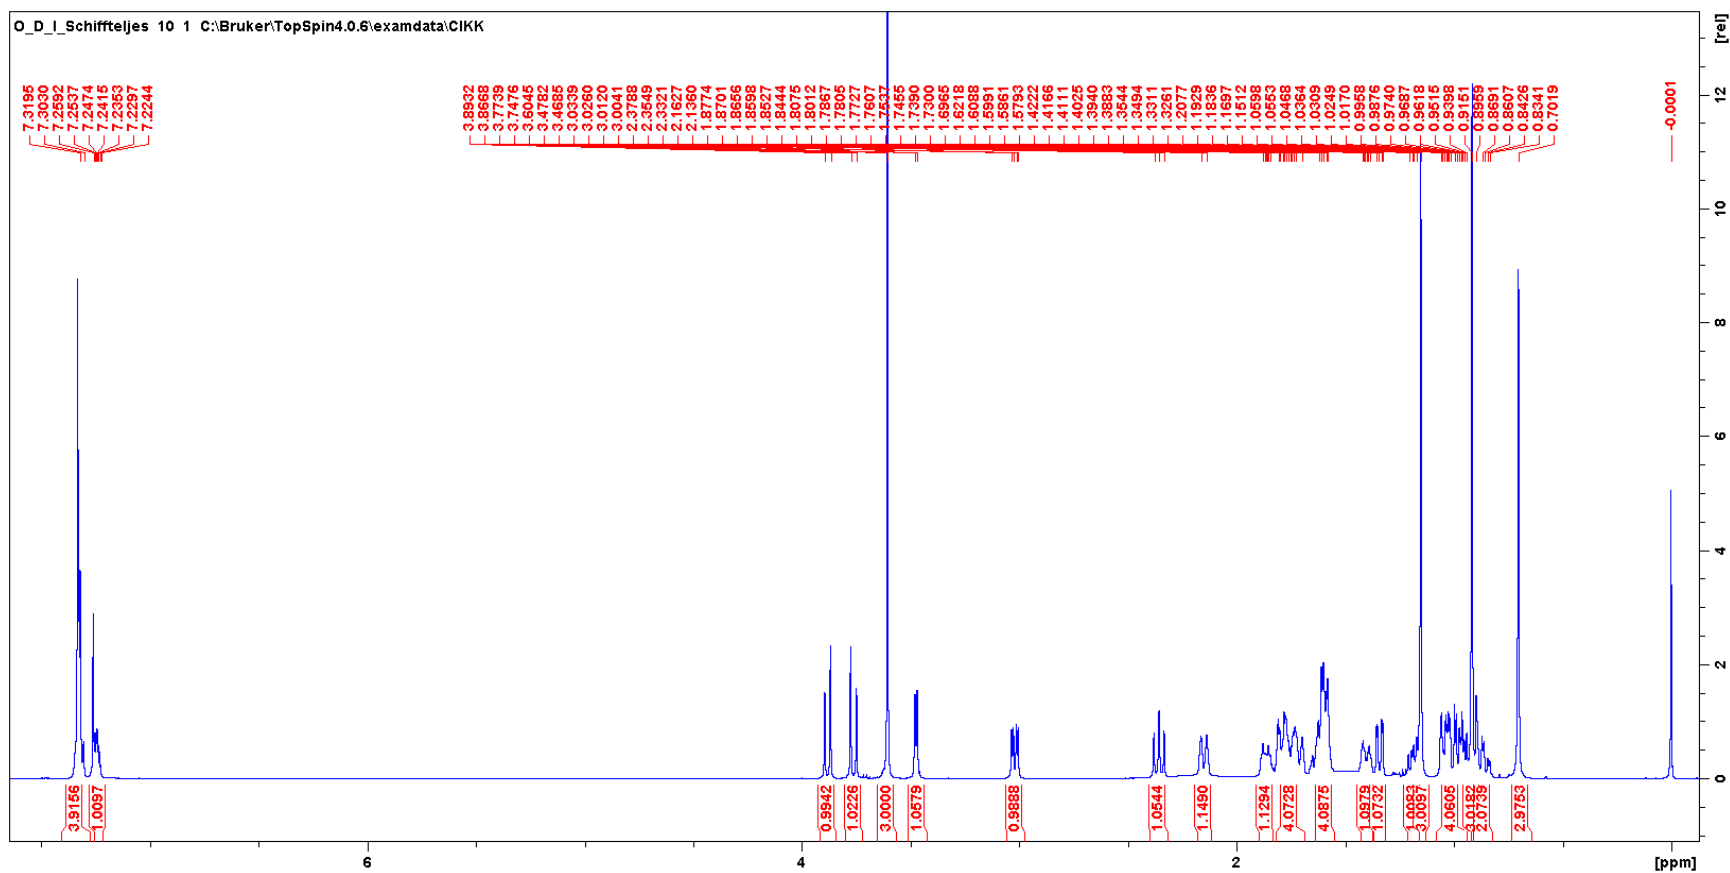

$^{13}\text{C}$ -NMR of compound (4*R*,6*aS*,8*R*,9*S*,11*bS*)-Methyl 7-((benzylamino)methyl)-8-hydroxy-4,9,11*b*-trimethyltetradecahydro-6*a*,9-methanocyclohepta[*a*]naphthalene-4-carboxylate (**8**)

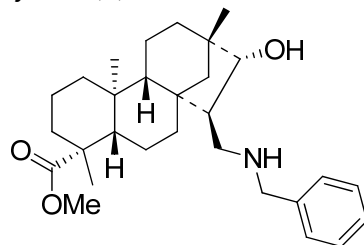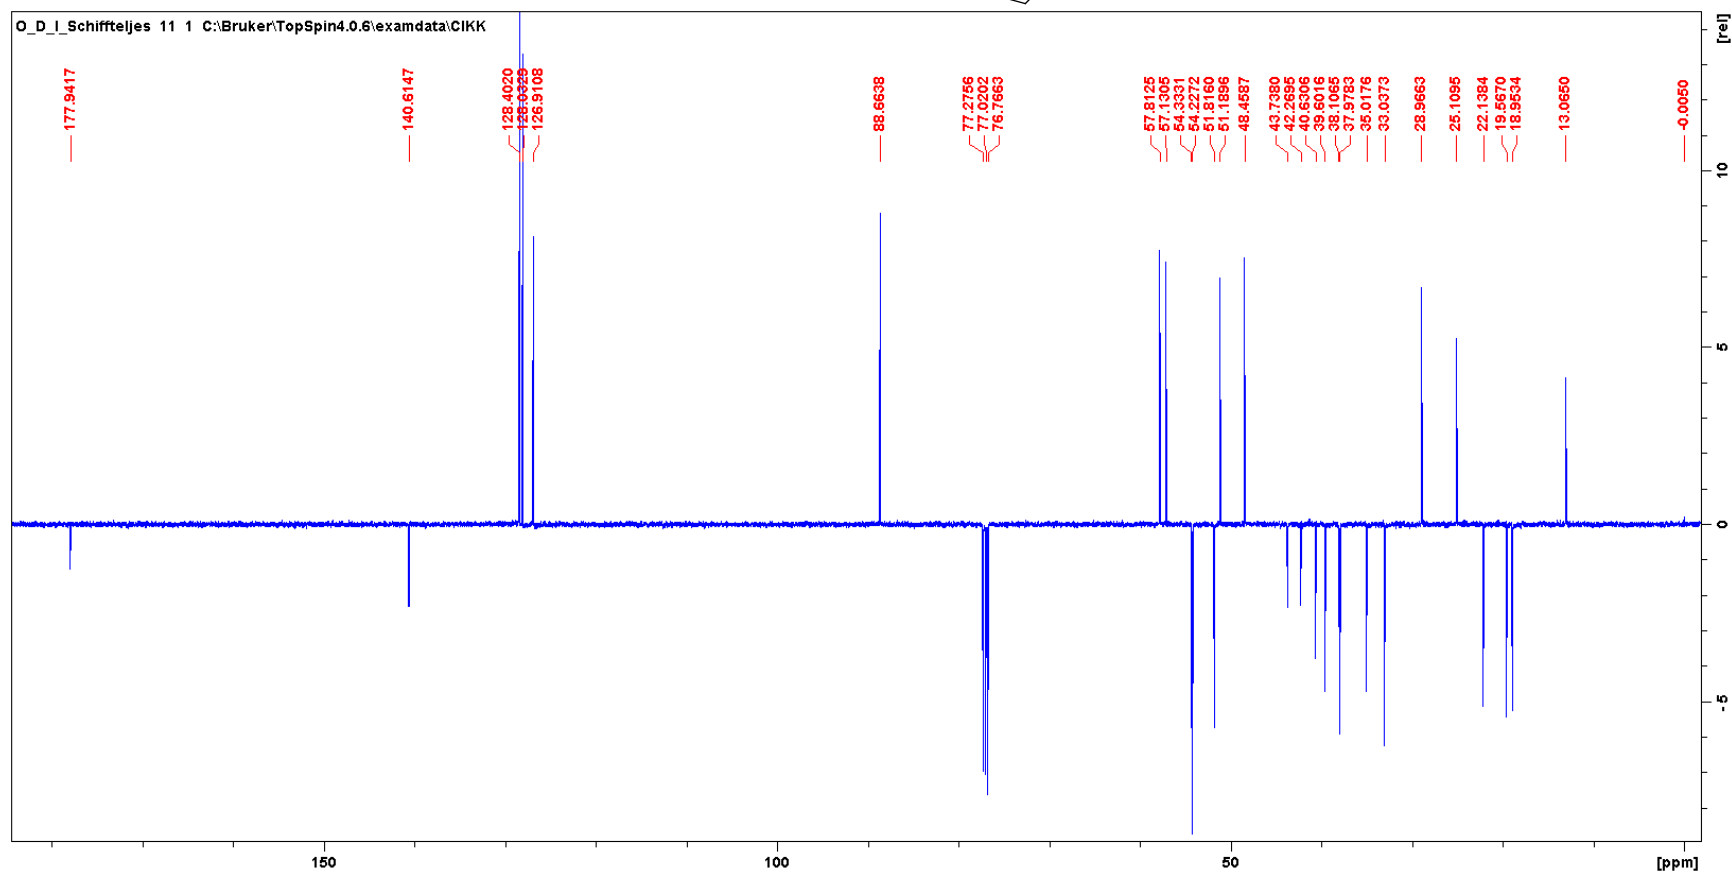

COSY of compound (4*R*,6*aS*,8*R*,9*S*,11*bS*)-Methyl 7-((benzylamino)methyl)-8-hydroxy-4,9,11*b*-trimethyltetradecahydro-6*a*,9-methanocyclohepta[*a*]naphthalene-4-carboxylate (**8**)

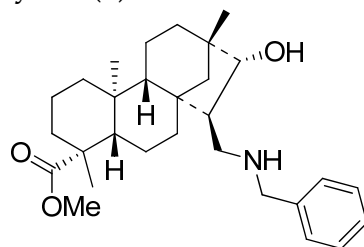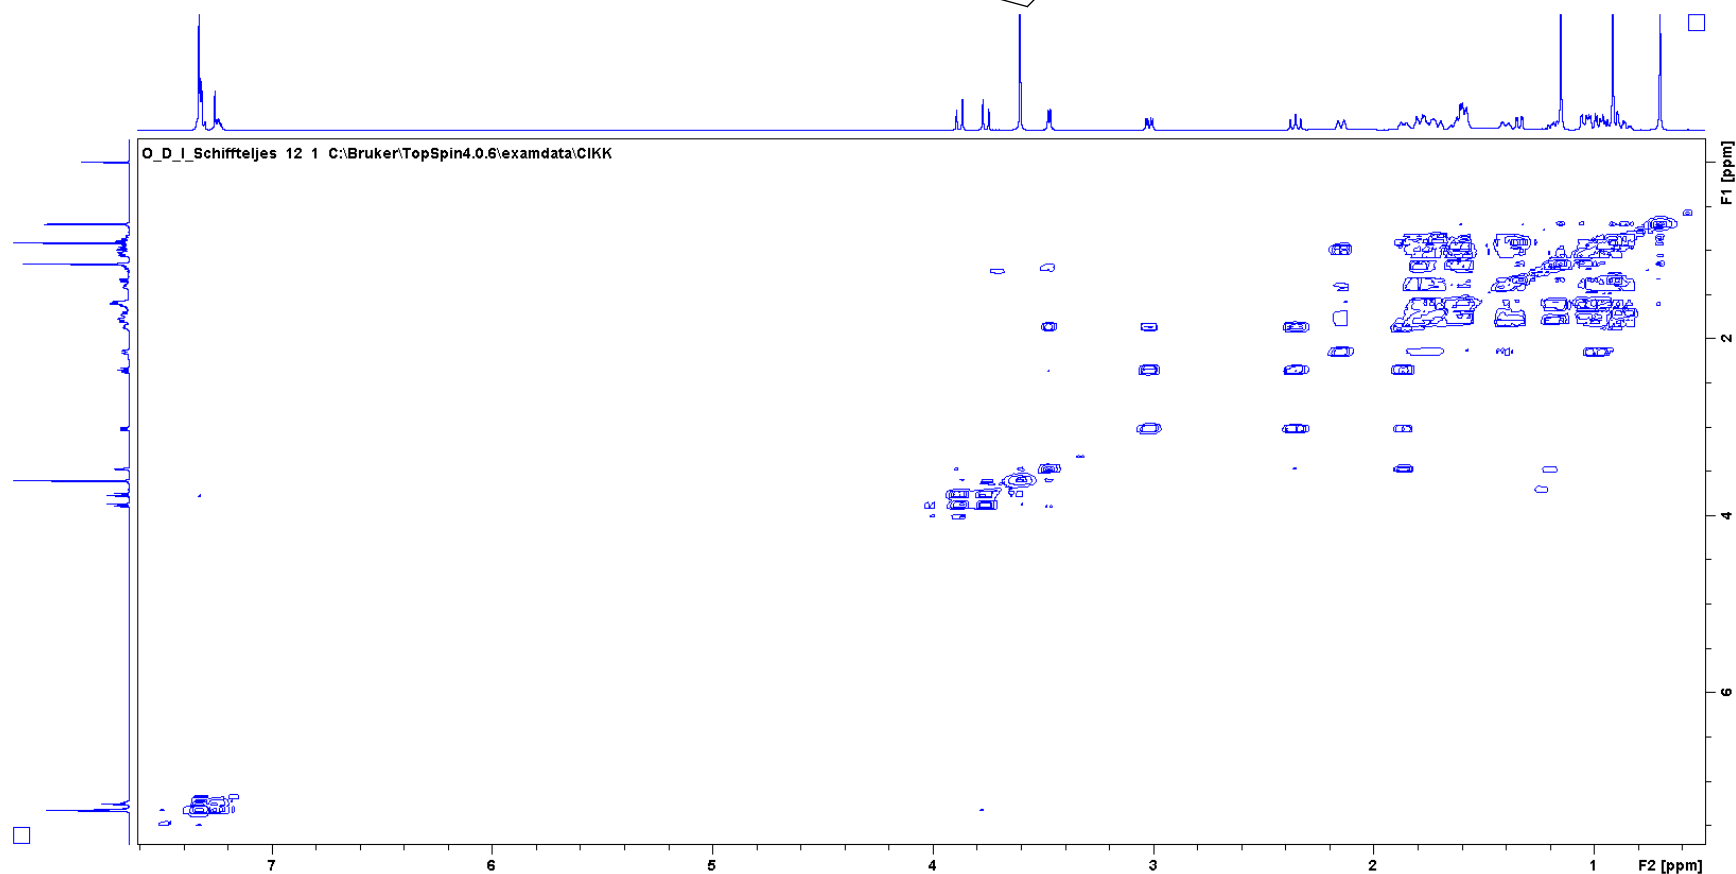

NOESY of compound (4*R*,6*aS*,8*R*,9*S*,11*bS*)-Methyl 7-((benzylamino)methyl)-8-hydroxy-4,9,11*b*-trimethyltetradecahydro-6*a*,9-methanocyclohepta[*a*]naphthalene-4-carboxylate (**8**)

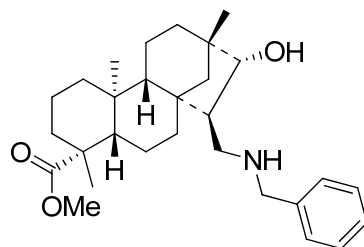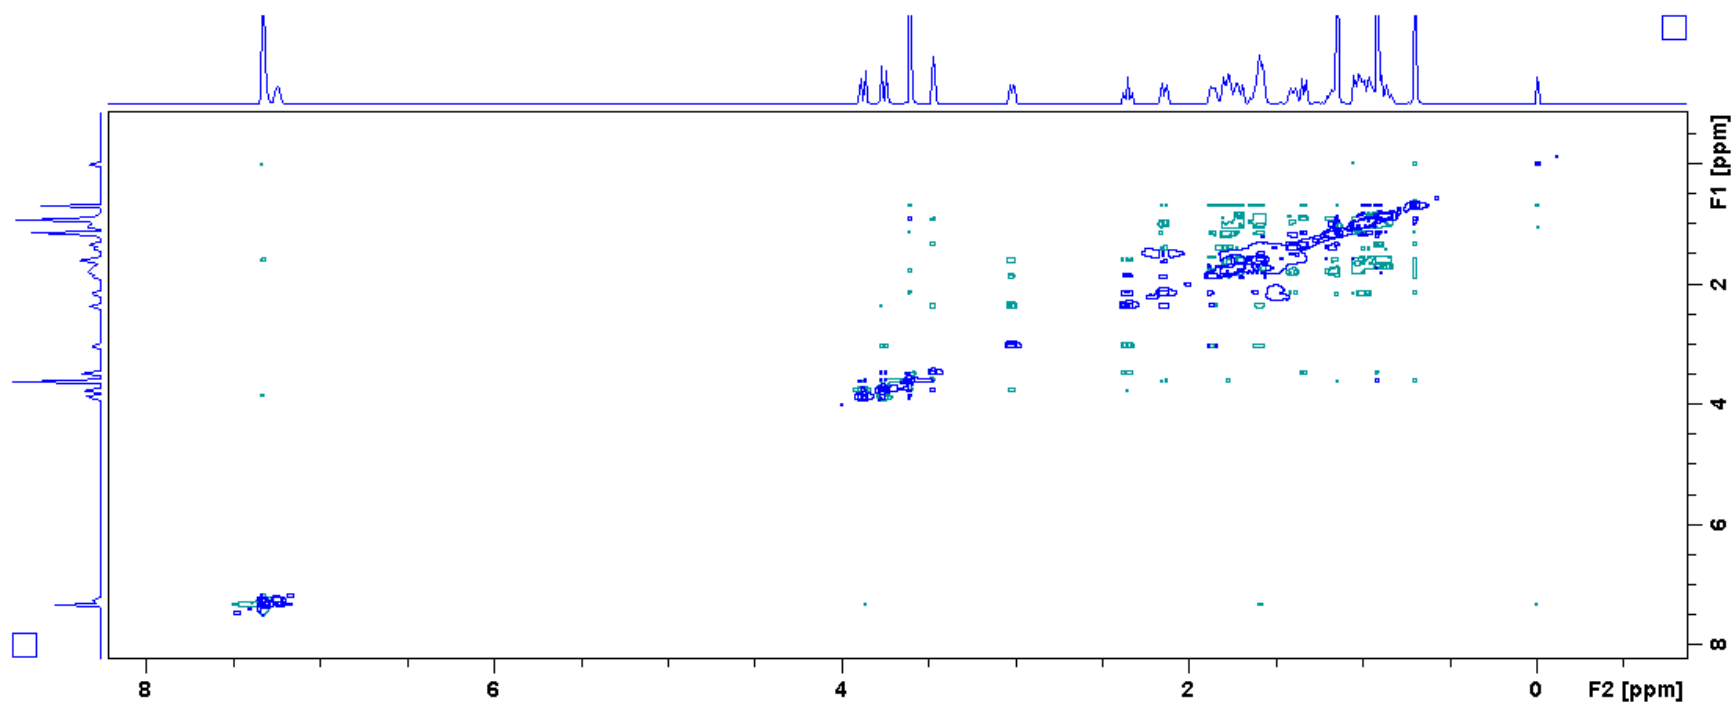

HSQC of compound (4*R*,6*aS*,8*R*,9*S*,11*bS*)-Methyl 7-((benzylamino)methyl)-8-hydroxy-4,9,11*b*-trimethyltetradecahydro-6*a*,9-methanocyclohepta[*a*]naphthalene-4-carboxylate (**8**)

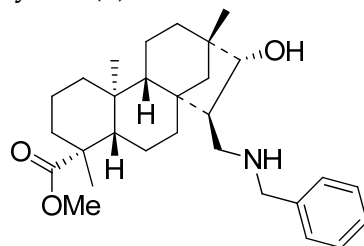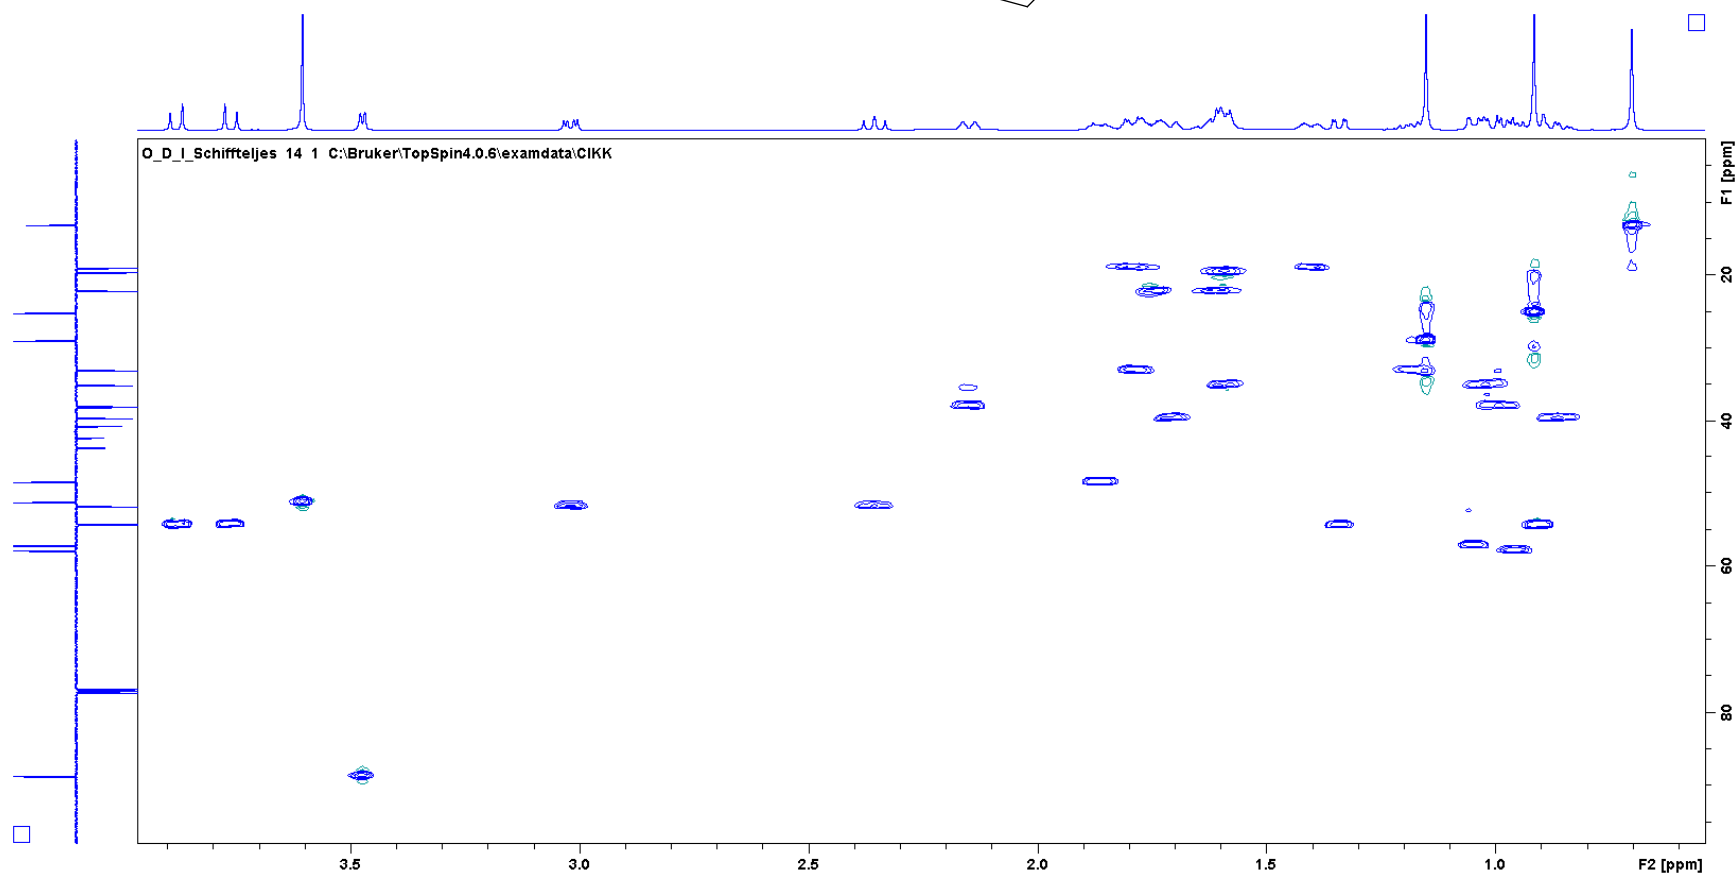

HMBC of compound (4*R*,6*aS*,8*R*,9*S*,11*bS*)-Methyl 7-((benzylamino)methyl)-8-hydroxy-4,9,11*b*-trimethyltetradecahydro-6*a*,9-methanocyclohepta[*a*]naphthalene-4-carboxylate (**8**)

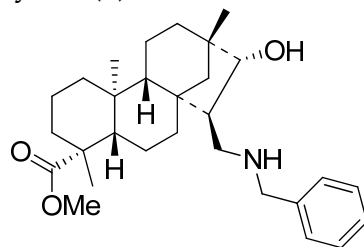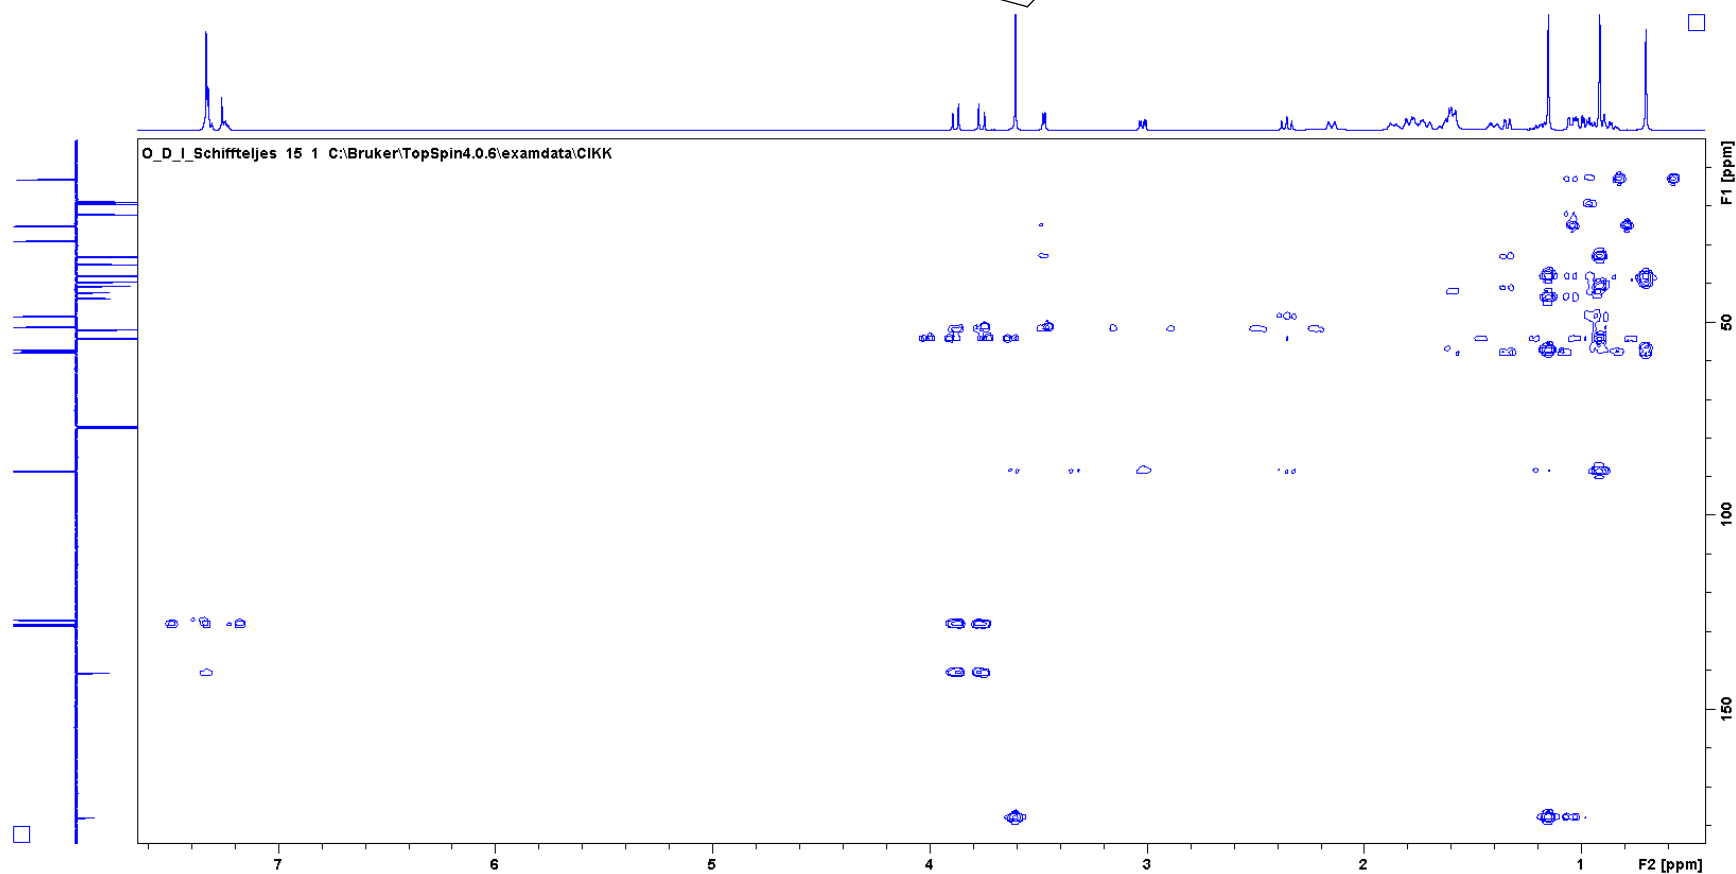

$^1\text{H}$ -NMR of compound (4*R*,6*aS*,8*R*,9*S*,11*bS*)-Methyl 8-hydroxy-4,9,11*b*-trimethyl-7-((((*S*)-1-phenylethyl)amino)methyl)tetradecahydro-6*a*,9-methanocyclohepta[*a*]naphthalene-4-carboxylate (**9**)

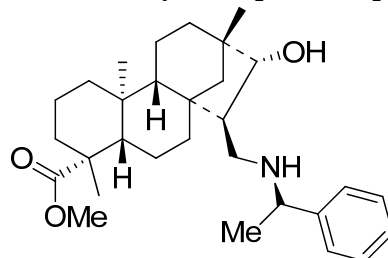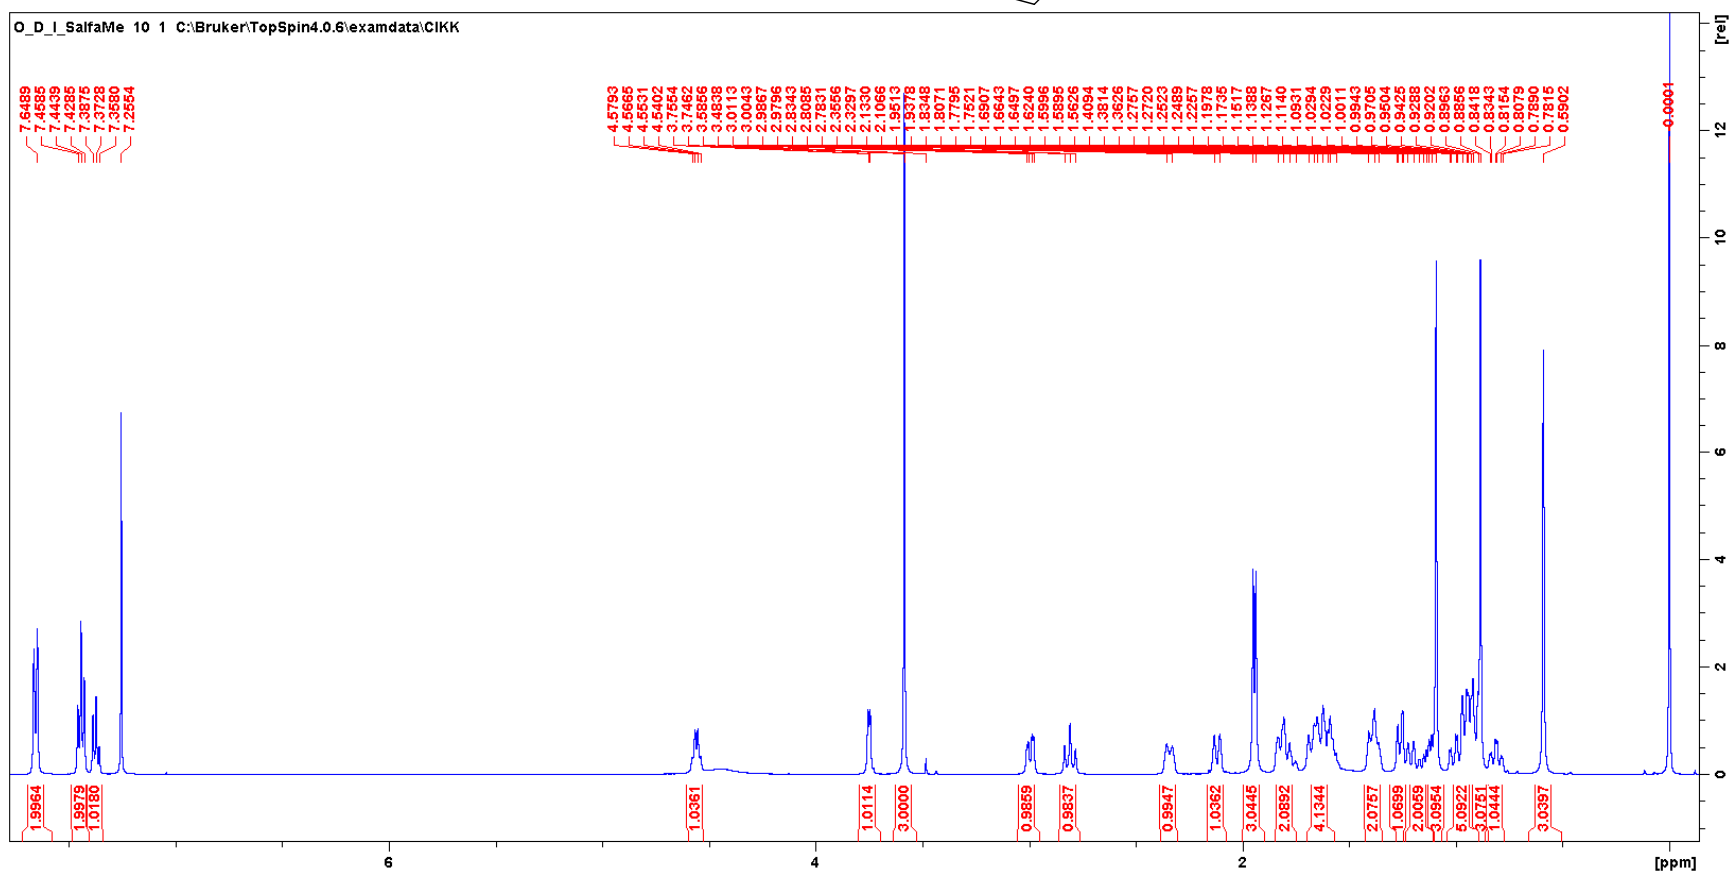



$^{13}\text{C}$ -NMR of compound (4*R*,6*aS*,8*R*,9*S*,11*bS*)-Methyl 8-hydroxy-4,9,11*b*-trimethyl-7-((((*S*)-1-phenylethyl)amino)methyl)tetradecahydro-6*a*,9-methanocyclohepta[*a*]naphthalene-4-carboxylate (**9**)

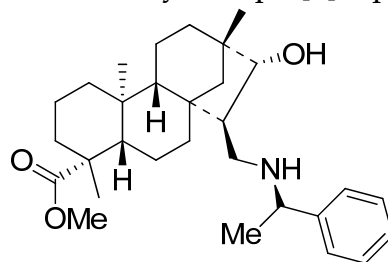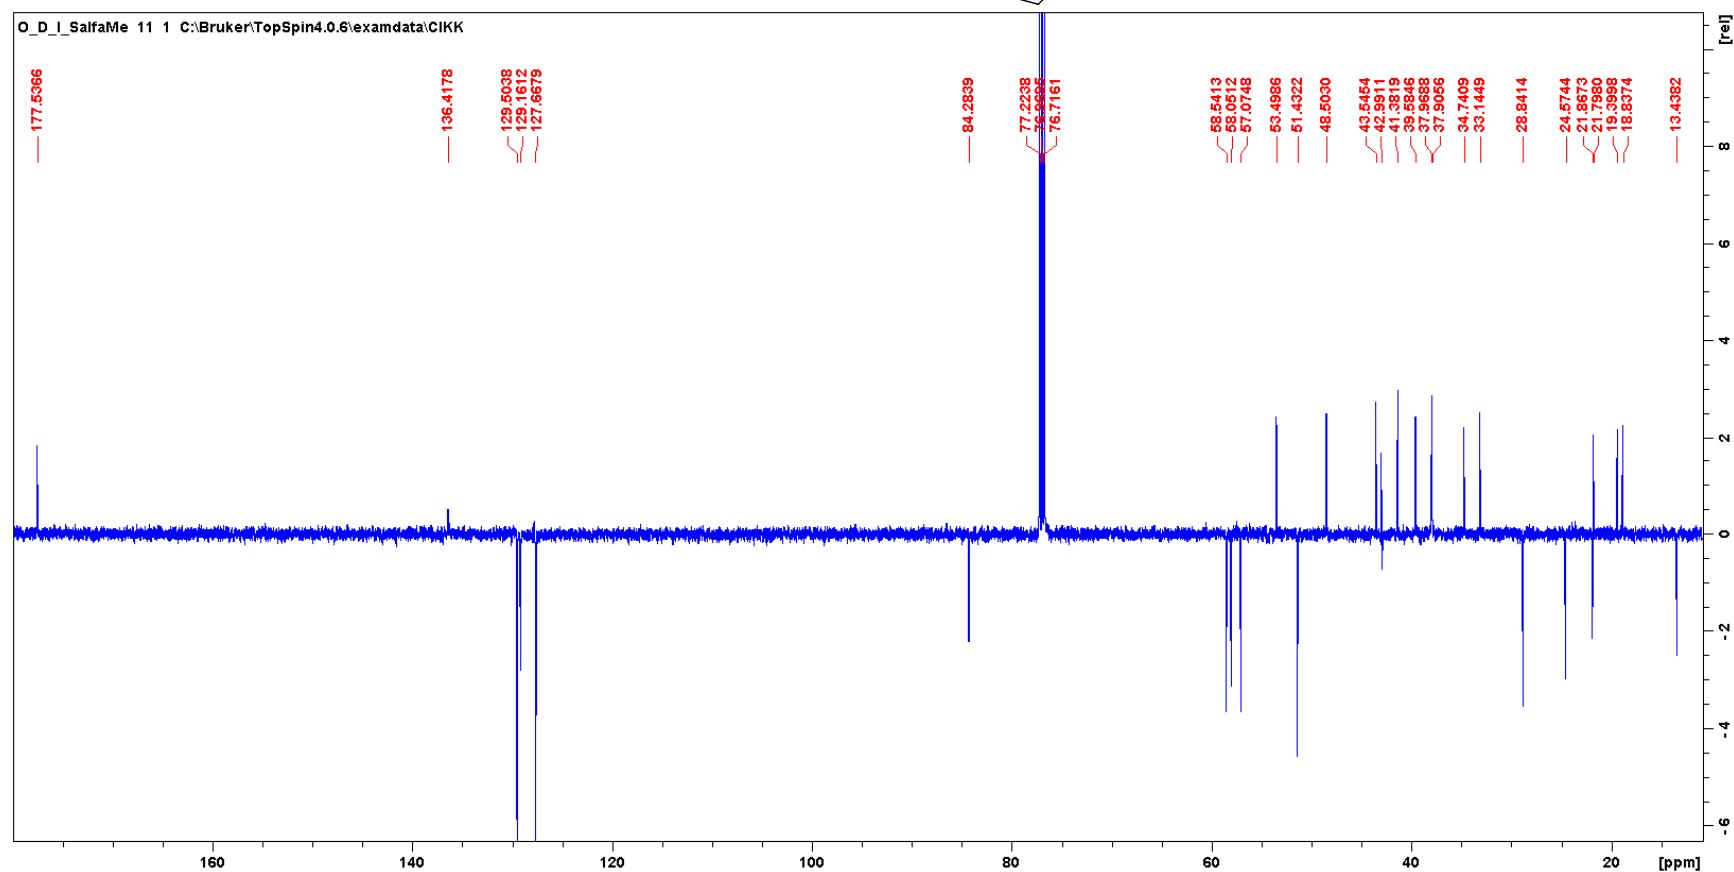

COSY of compound (4*R*,6*aS*,8*R*,9*S*,11*bS*)-Methyl 8-hydroxy-4,9,11*b*-trimethyl-7-((((*S*)-1-phenylethyl)amino)methyl)tetradecahydro-6*a*,9-methanocyclohepta[*a*]naphthalene-4-carboxylate (**9**)

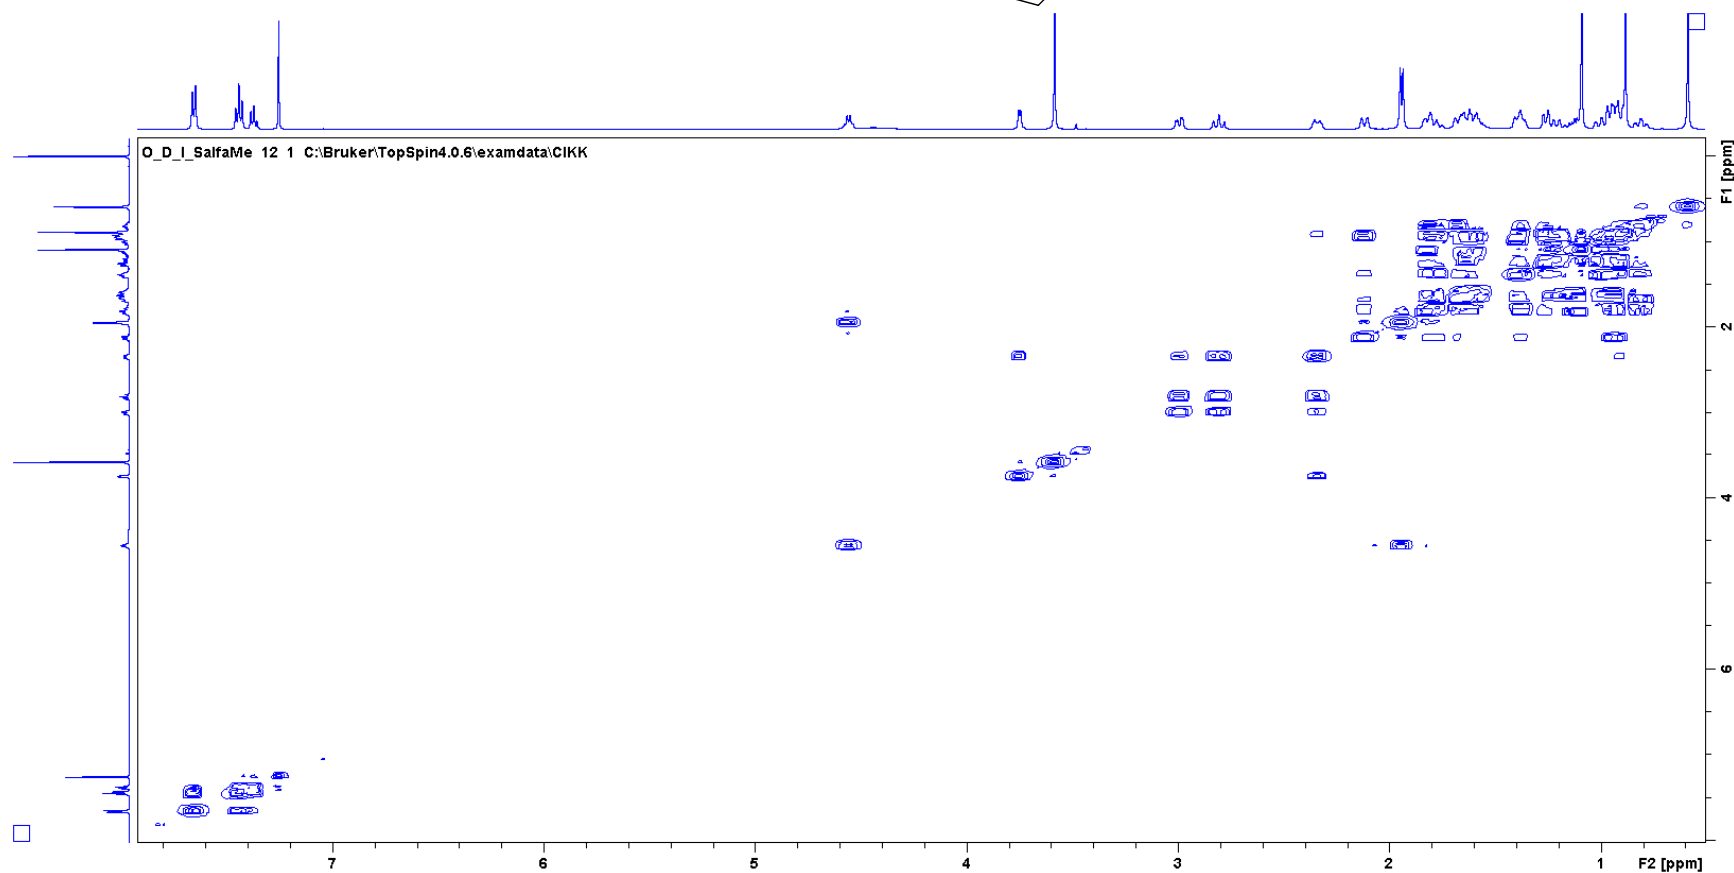

NOESY of compound (4*R*,6*aS*,8*R*,9*S*,11*bS*)-Methyl 8-hydroxy-4,9,11*b*-trimethyl-7-(((*S*)-1-phenylethyl)amino)methyl)tetradecahydro-6*a*,9-methanocyclohepta[*a*]naphthalene-4-carboxylate (**9**)

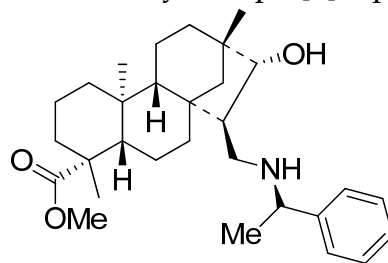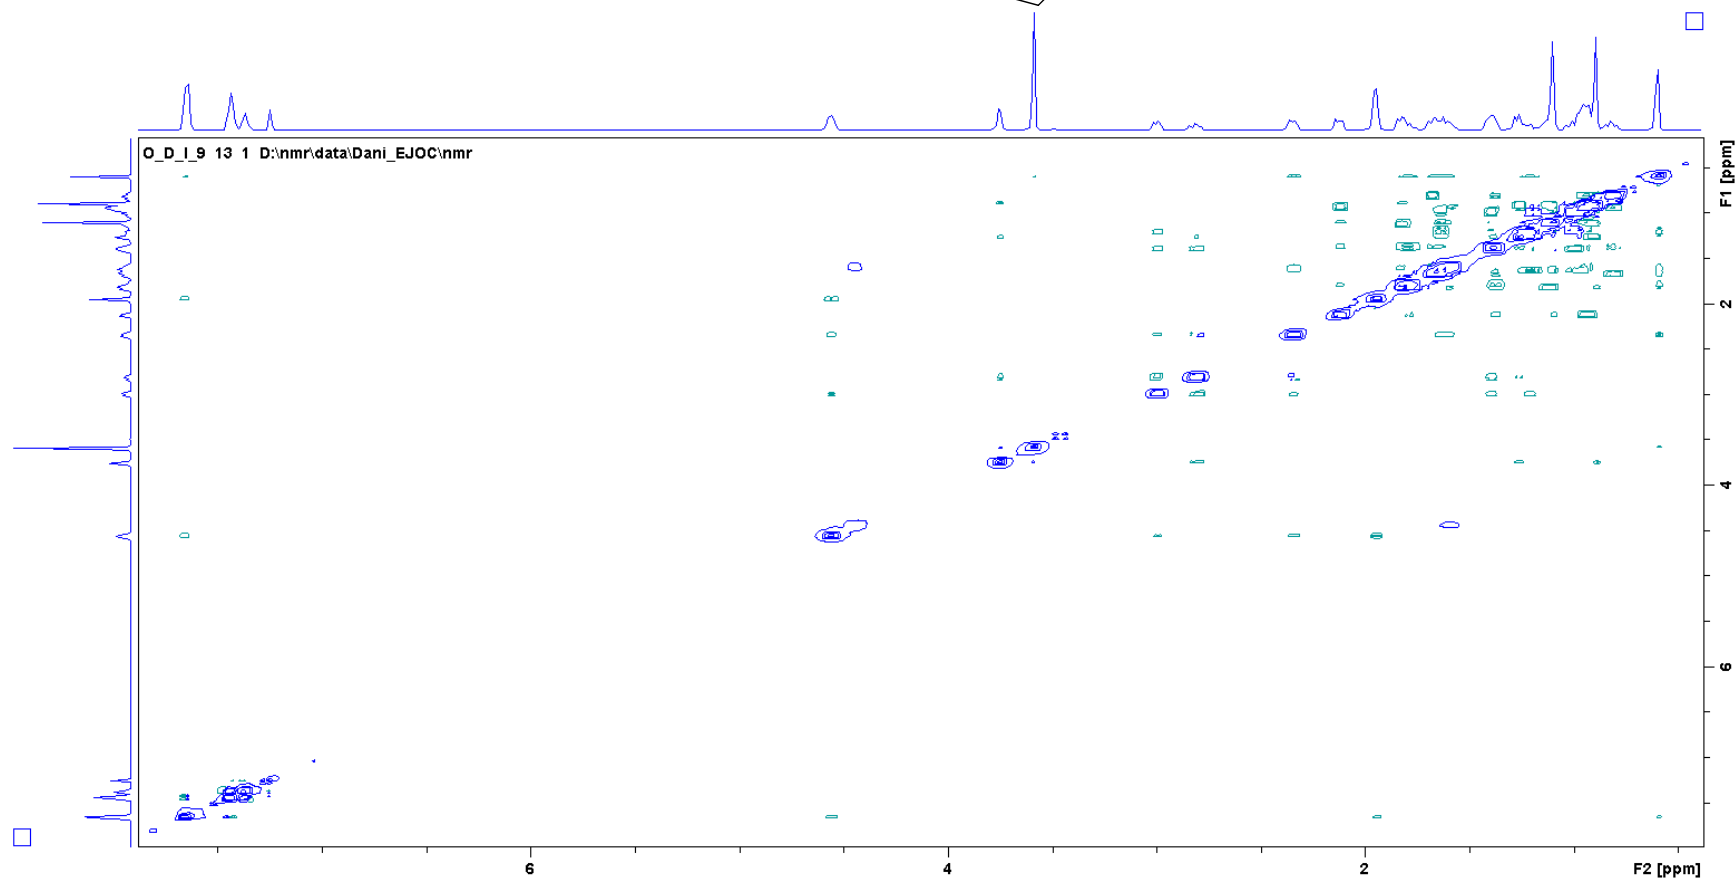

HSQC of compound (4*R*,6*aS*,8*R*,9*S*,11*bS*)-Methyl 8-hydroxy-4,9,11*b*-trimethyl-7-((((*S*)-1-phenylethyl)amino)methyl)tetradecahydro-6*a*,9-methanocyclohepta[*a*]naphthalene-4-carboxylate (**9**)

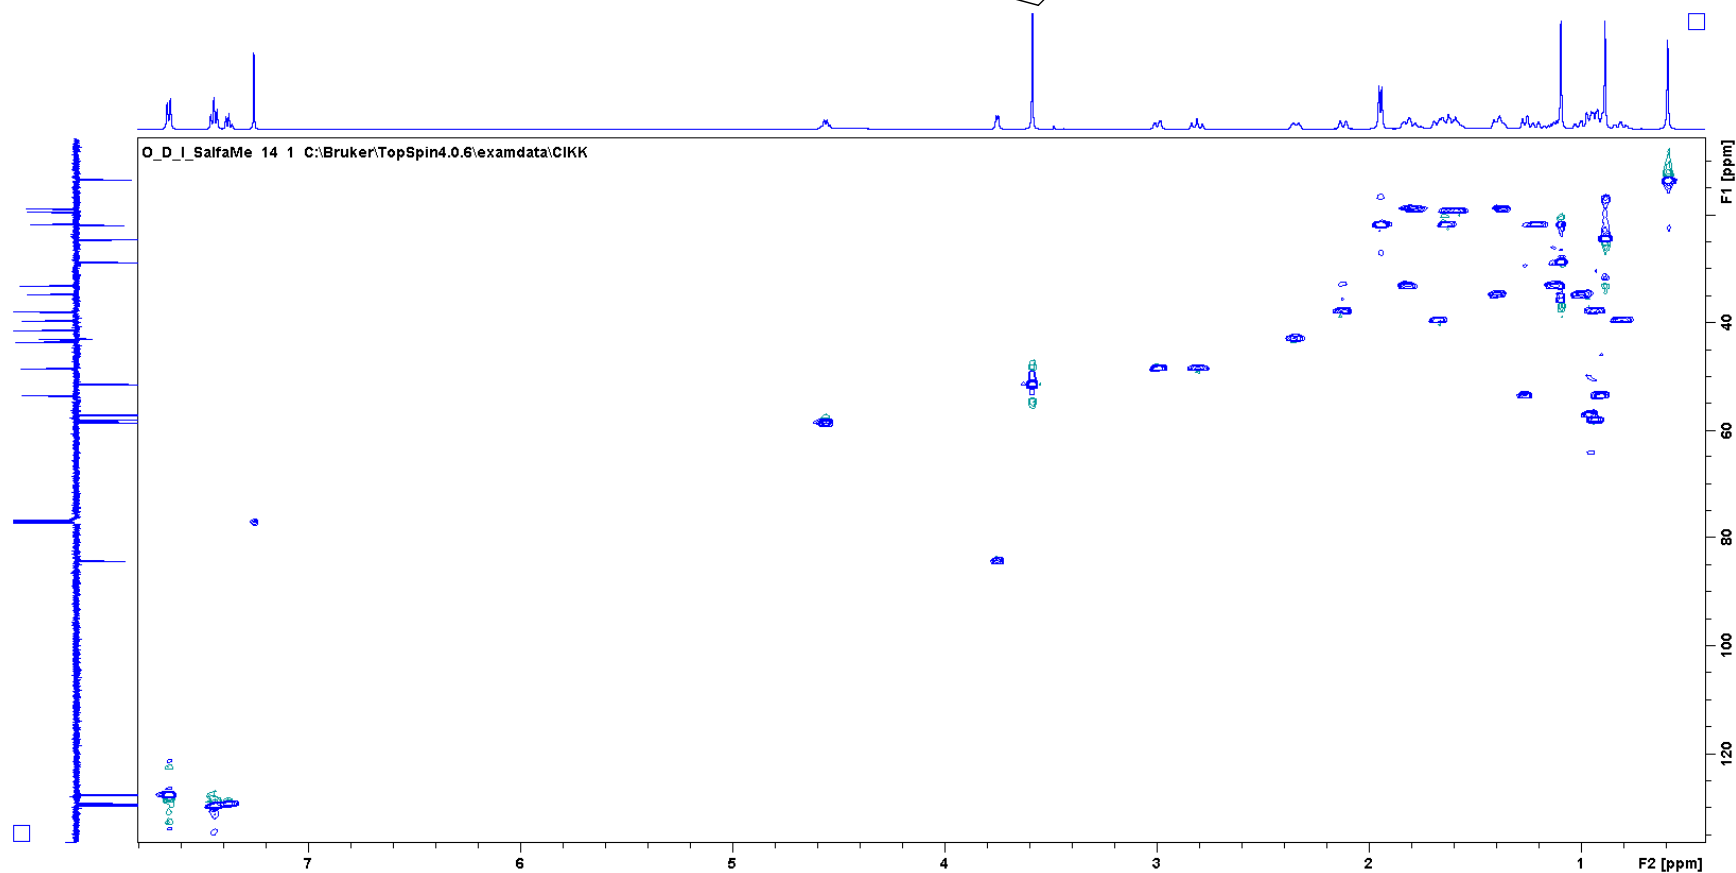

HMBC of compound (4*R*,6*aS*,8*R*,9*S*,11*bS*)-Methyl 8-hydroxy-4,9,11*b*-trimethyl-7-((((*S*)-1-phenylethyl)amino)methyl)tetradecahydro-6*a*,9-methanocyclohepta[*a*]naphthalene-4-carboxylate (9)

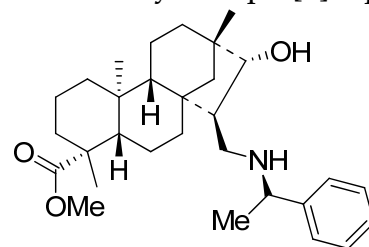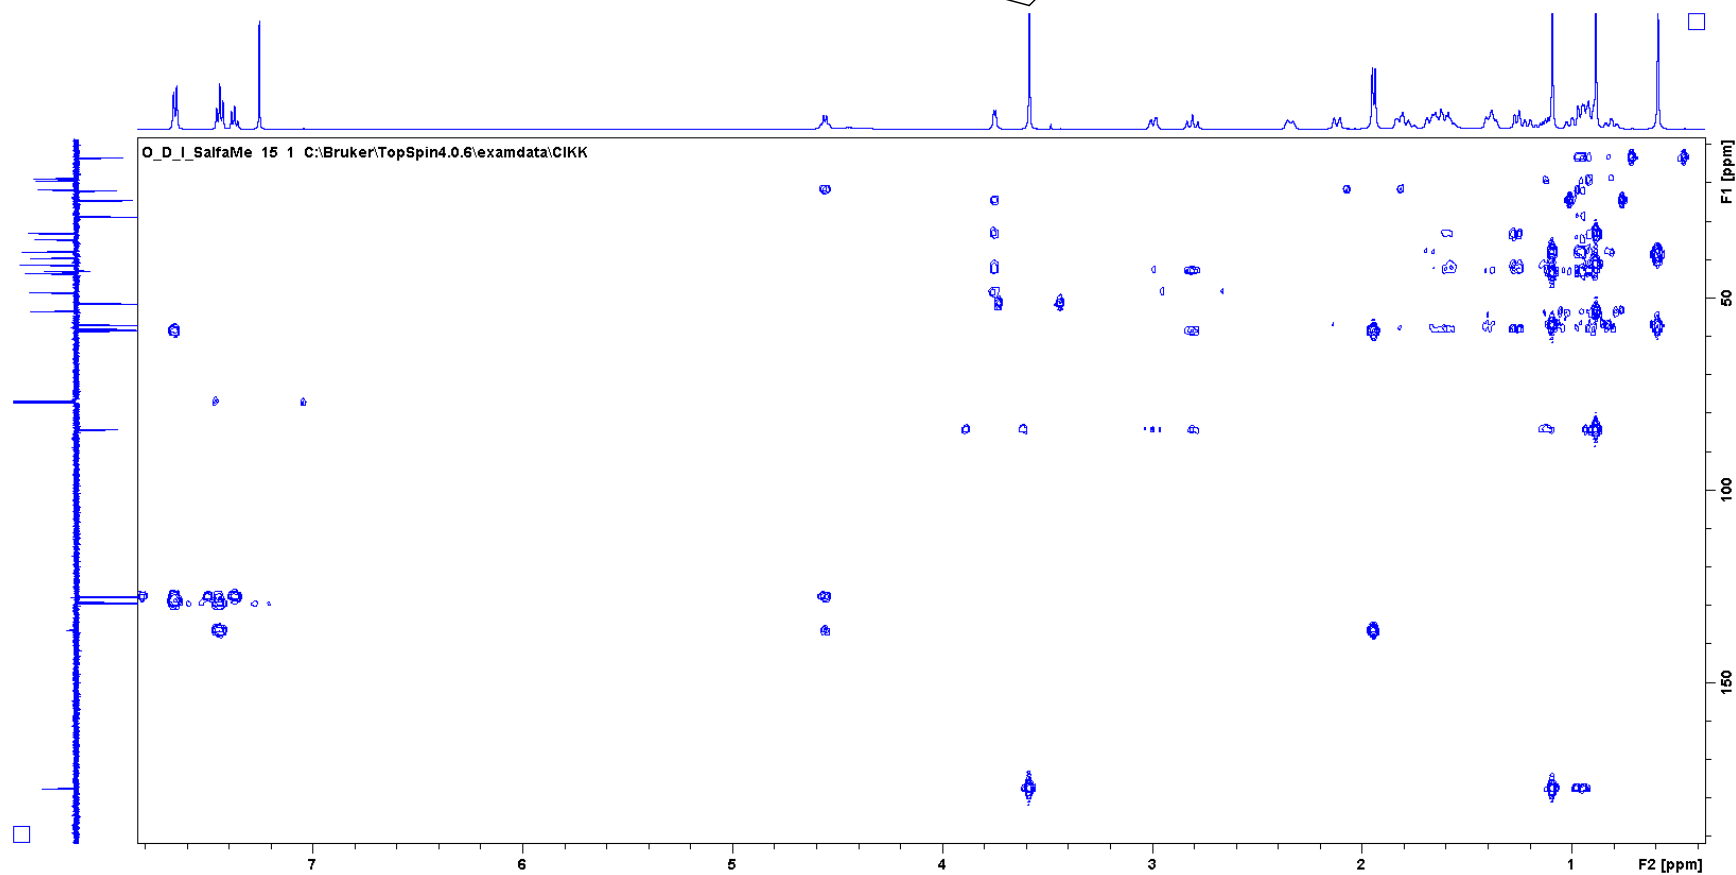

$^1\text{H}$ -NMR of compound (4*R*,6*aS*,8*R*,9*S*,11*bS*)-Methyl 8-hydroxy-4,9,11*b*-trimethyl-7-((((*R*)-1-phenylethyl)amino)methyl)tetradecahydro-6*a*,9-methanocyclohepta[*a*]naphthalene-4-carboxylate (**10**)

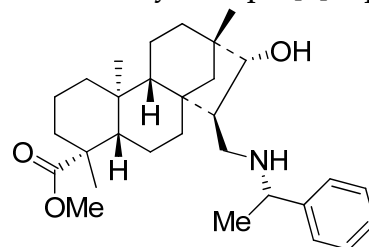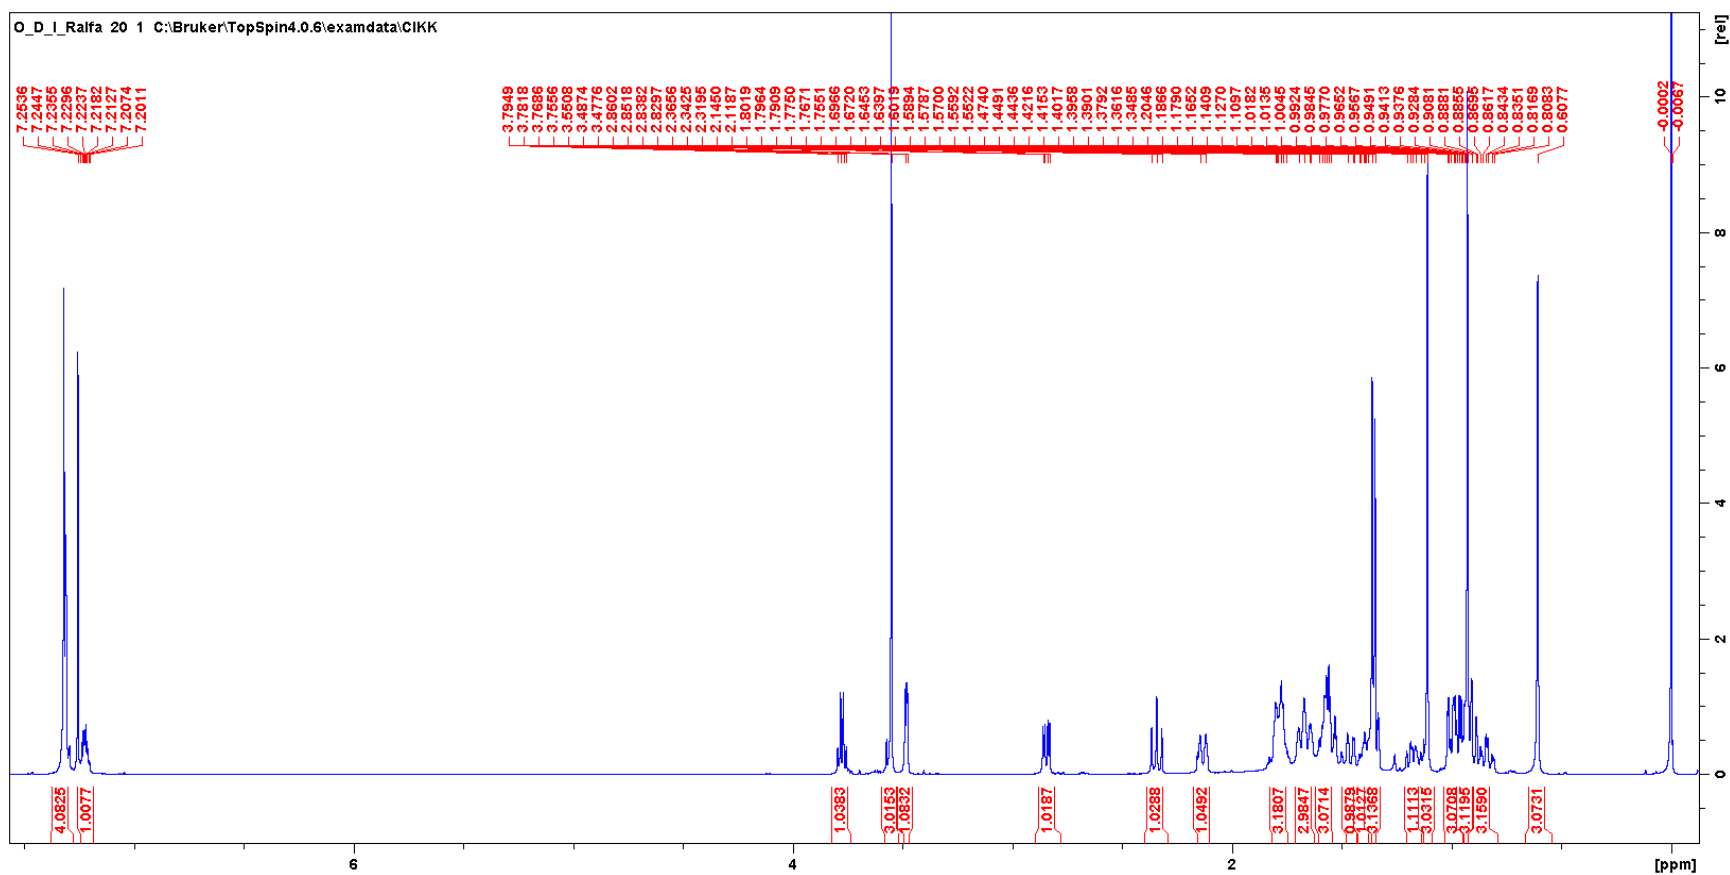

$^{13}\text{C}$ -NMR of compound (4*R*,6*aS*,8*R*,9*S*,11*bS*)-Methyl 8-hydroxy-4,9,11*b*-trimethyl-7-((((*R*)-1-phenylethyl)amino)methyl)tetradecahydro-6*a*,9-methanocyclohepta[*a*]naphthalene-4-carboxylate (**10**)

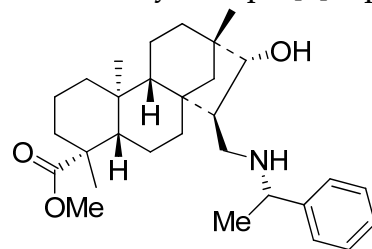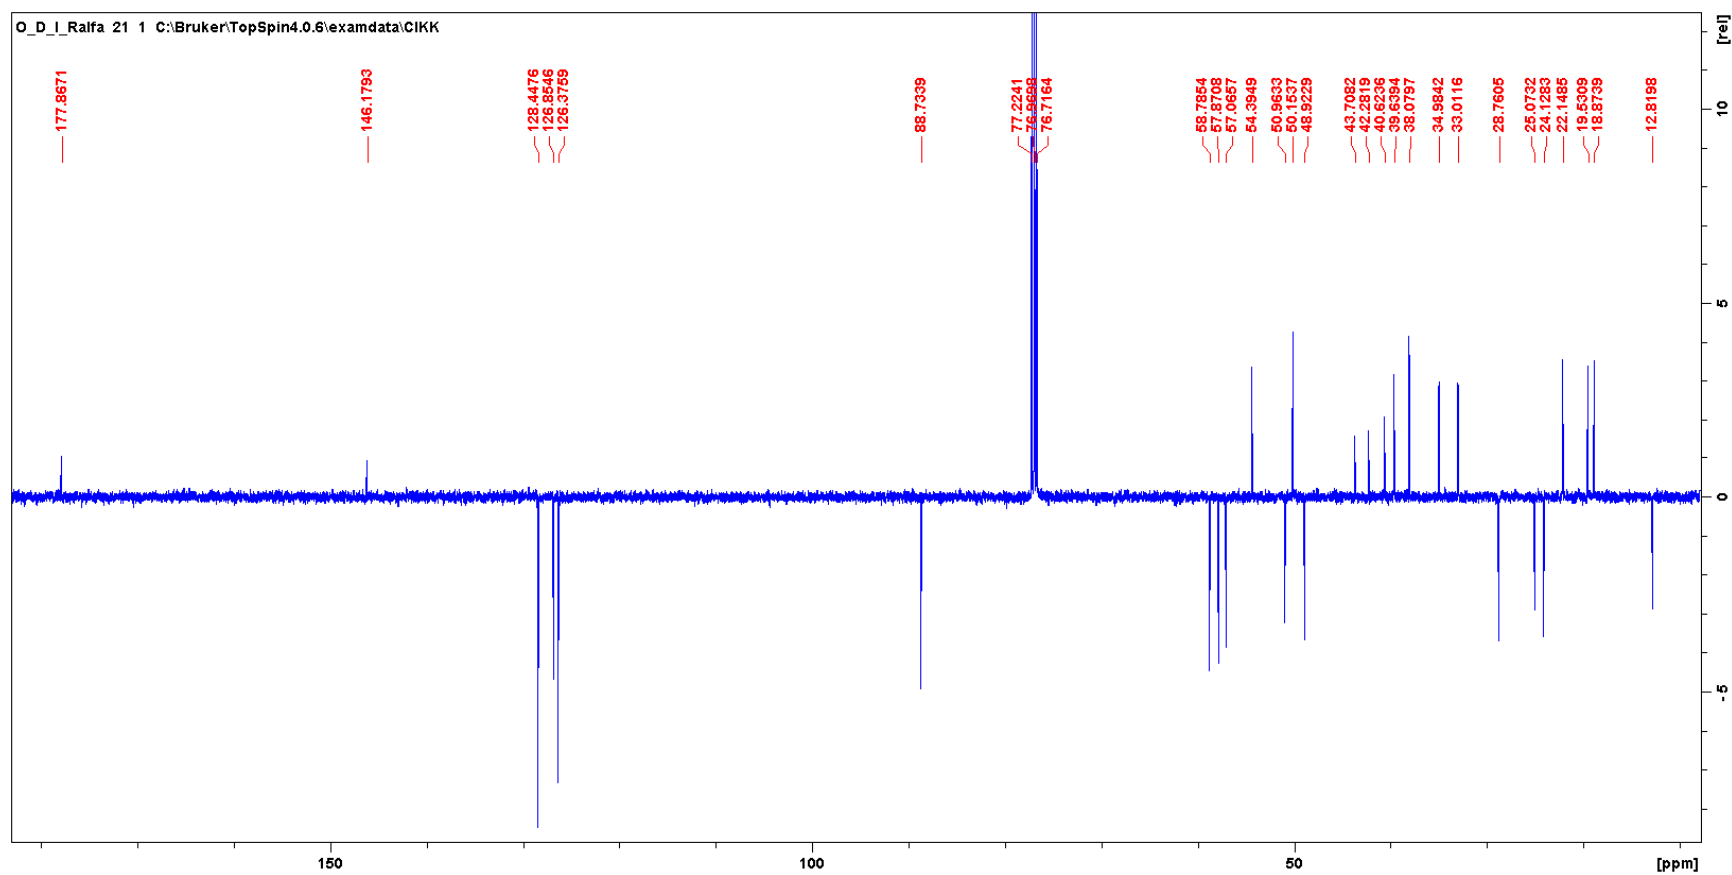

COSY of compound (4*R*,6*aS*,8*R*,9*S*,11*bS*)-Methyl 8-hydroxy-4,9,11*b*-trimethyl-7-((((*R*)-1-phenylethyl)amino)methyl)tetradecahydro-6*a*,9-methanocyclohepta[*a*]naphthalene-4-carboxylate (**10**)

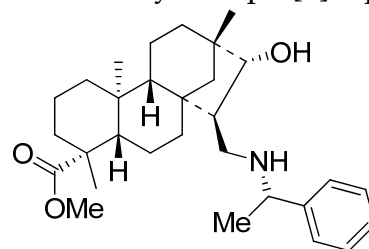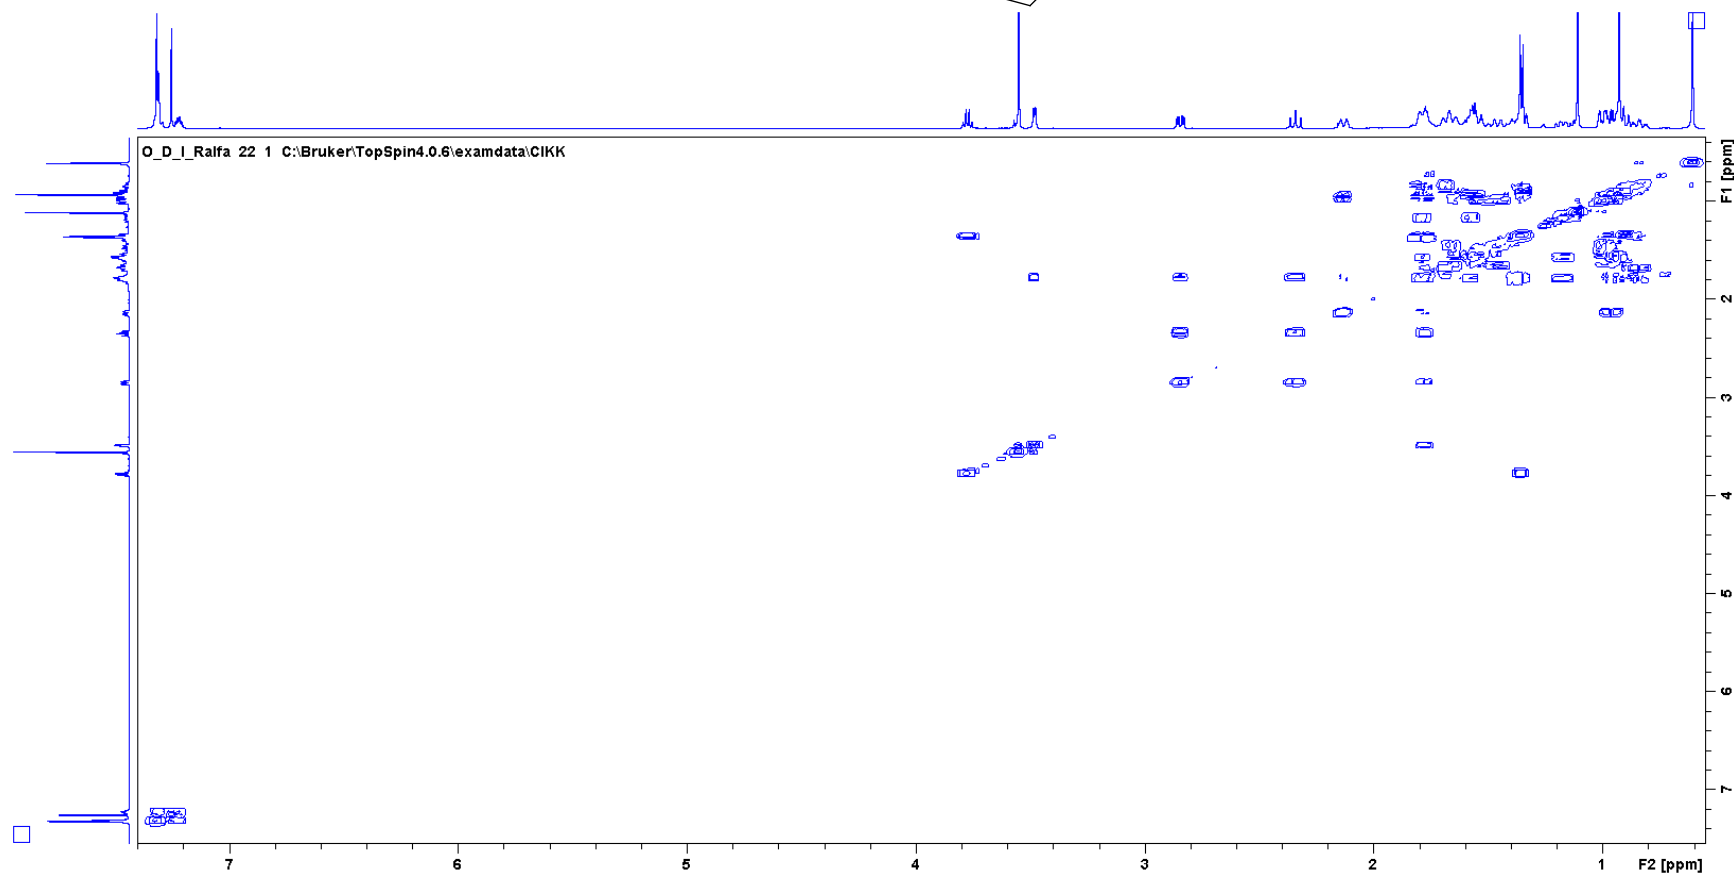



NOESY of compound (4*R*,6*aS*,8*R*,9*S*,11*bS*)-Methyl 8-hydroxy-4,9,11*b*-trimethyl-7-(((*R*)-1-phenylethyl)amino)methyl)tetradecahydro-6*a*,9-methanocyclohepta[*a*]naphthalene-4-carboxylate (**10**)

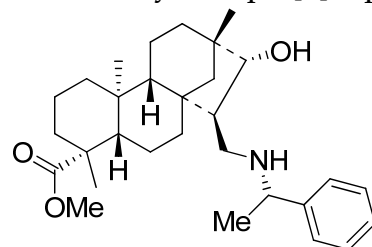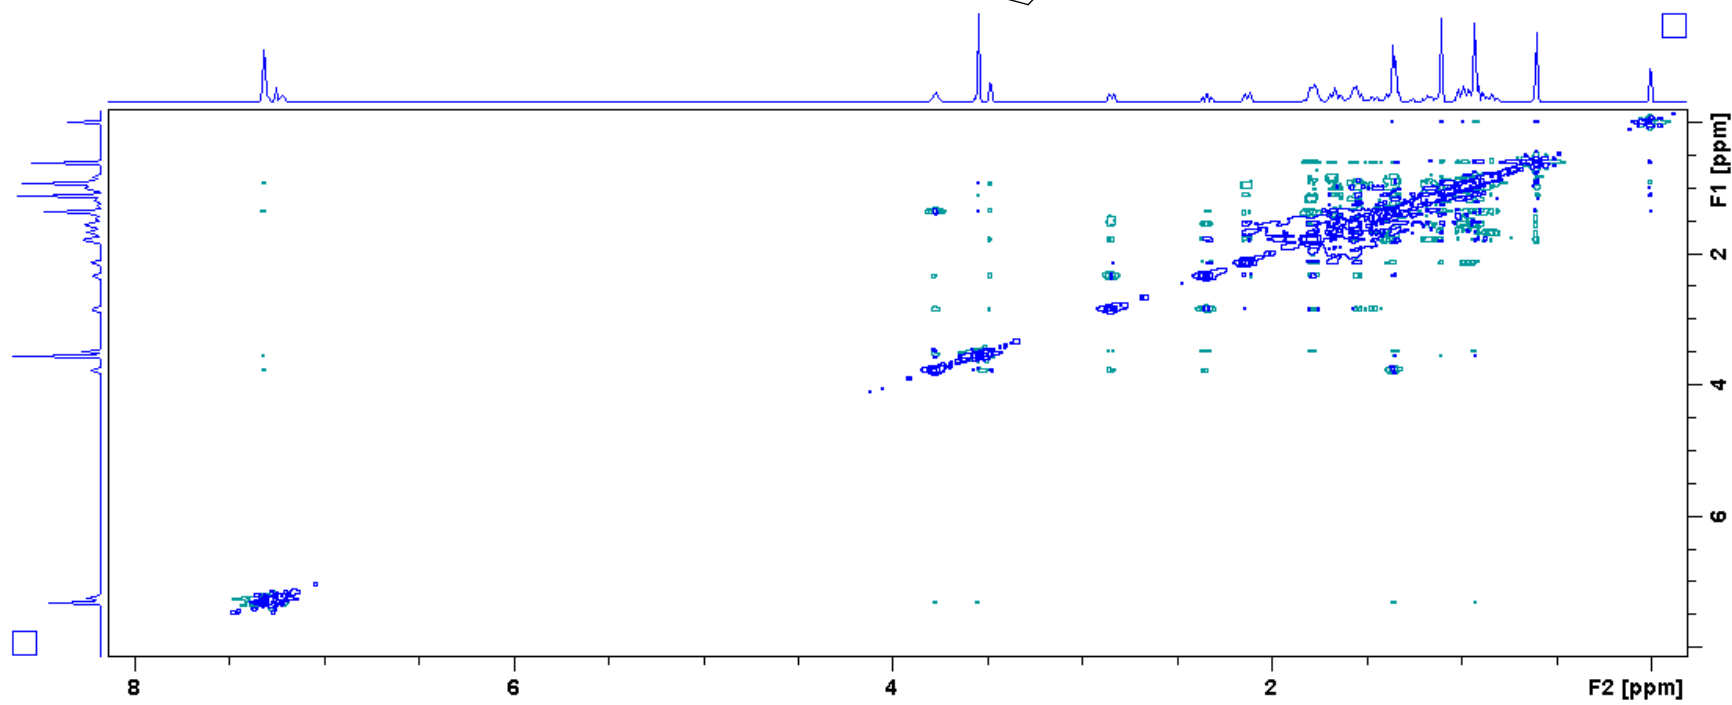

HSQC of compound (4*R*,6*aS*,8*R*,9*S*,11*bS*)-Methyl 8-hydroxy-4,9,11*b*-trimethyl-7-(((*R*)-1-phenylethyl)amino)methyl)tetradecahydro-6*a*,9-methanocyclohepta[*a*]naphthalene-4-carboxylate (**10**)

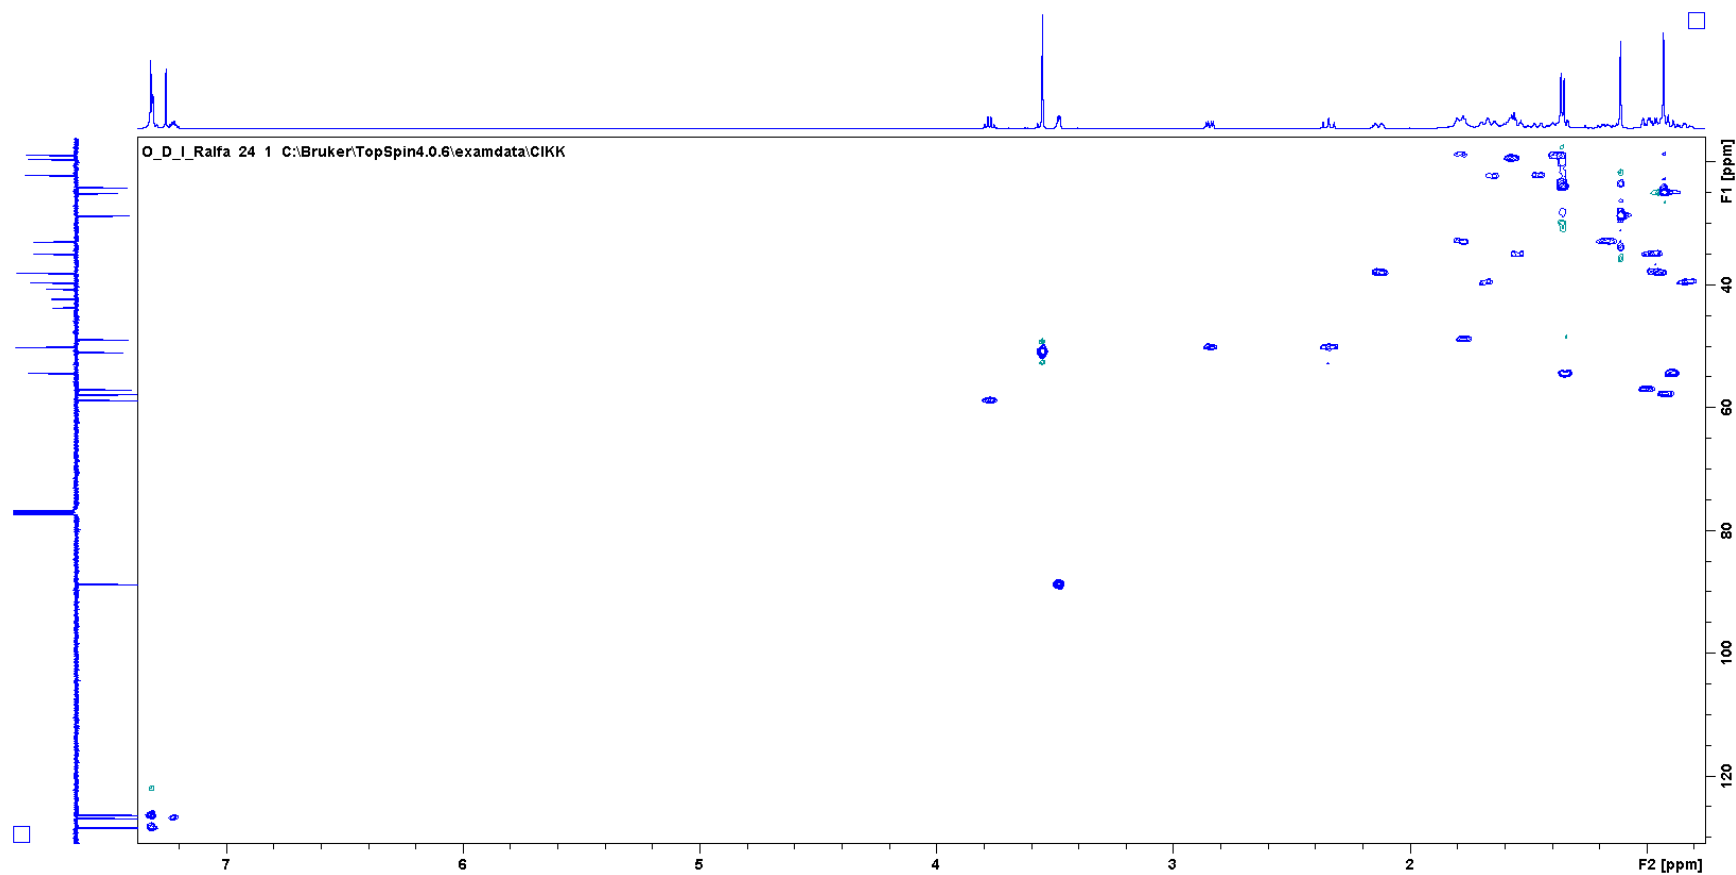

HMBC of compound (4*R*,6*aS*,8*R*,9*S*,11*bS*)-Methyl 8-hydroxy-4,9,11*b*-trimethyl-7-((((*R*)-1-phenylethyl)amino)methyl)tetradecahydro-6*a*,9-methanocyclohepta[*a*]naphthalene-4-carboxylate (**10**)

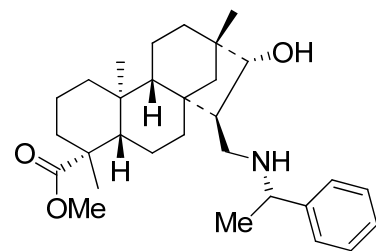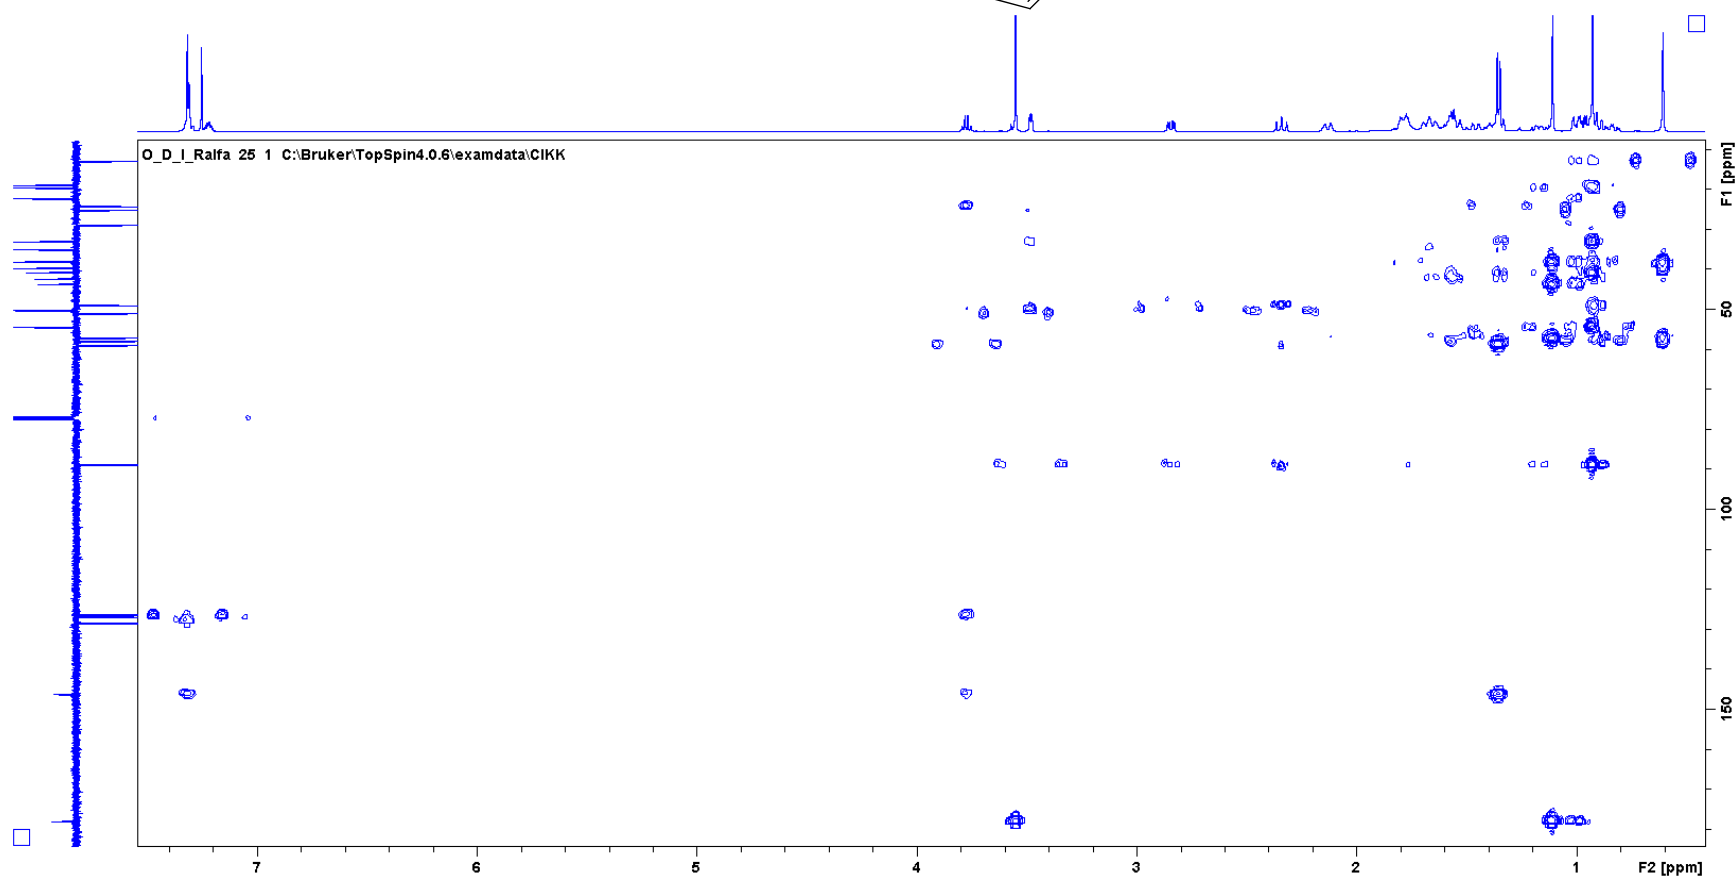

$^1\text{H}$ -NMR of compound (4*R*,6*aS*,8*R*,9*S*,11*bS*)-Methyl 8-hydroxy-7-(((4-methoxybenzyl)amino)methyl)-4,9,11*b*-trimethyltetradecahydro-6*a*,9-methanocyclohepta[*a*]naphthalene-4-carboxylate (**11**)

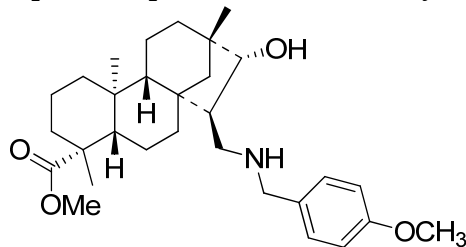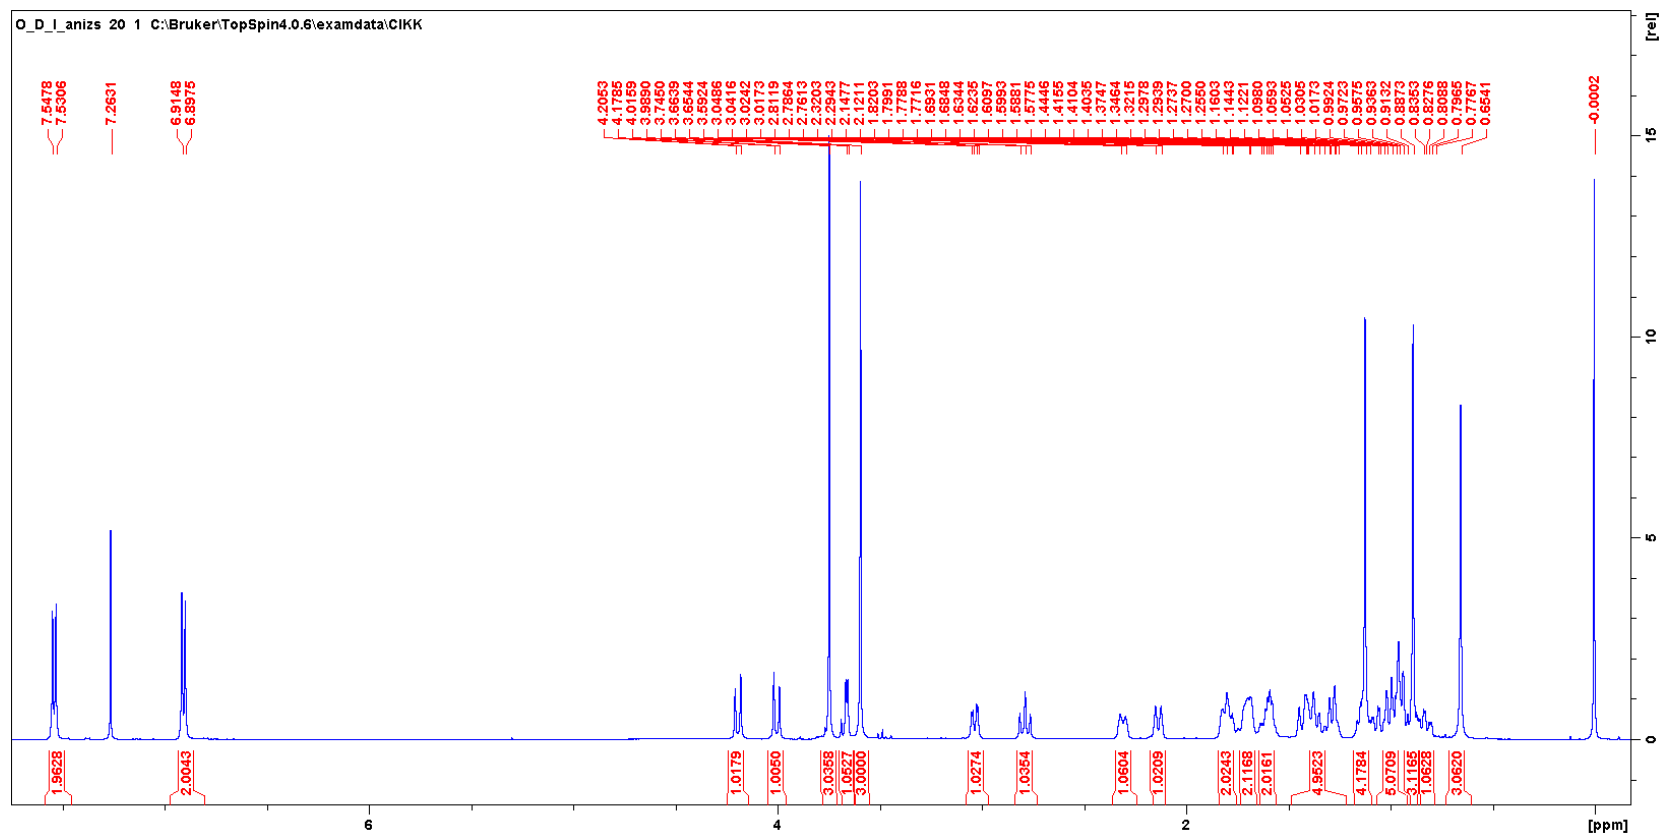

$^{13}\text{C}$ -NMR of compound (4*R*,6*aS*,8*R*,9*S*,11*bS*)-Methyl 8-hydroxy-7-(((4-methoxybenzyl)amino)methyl)-4,9,11*b*-trimethyltetradecahydro-6*a*,9-methanocyclohepta[*a*]naphthalene-4-carboxylate (**11**)

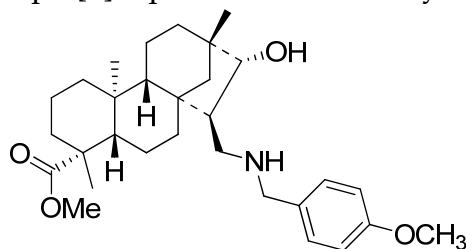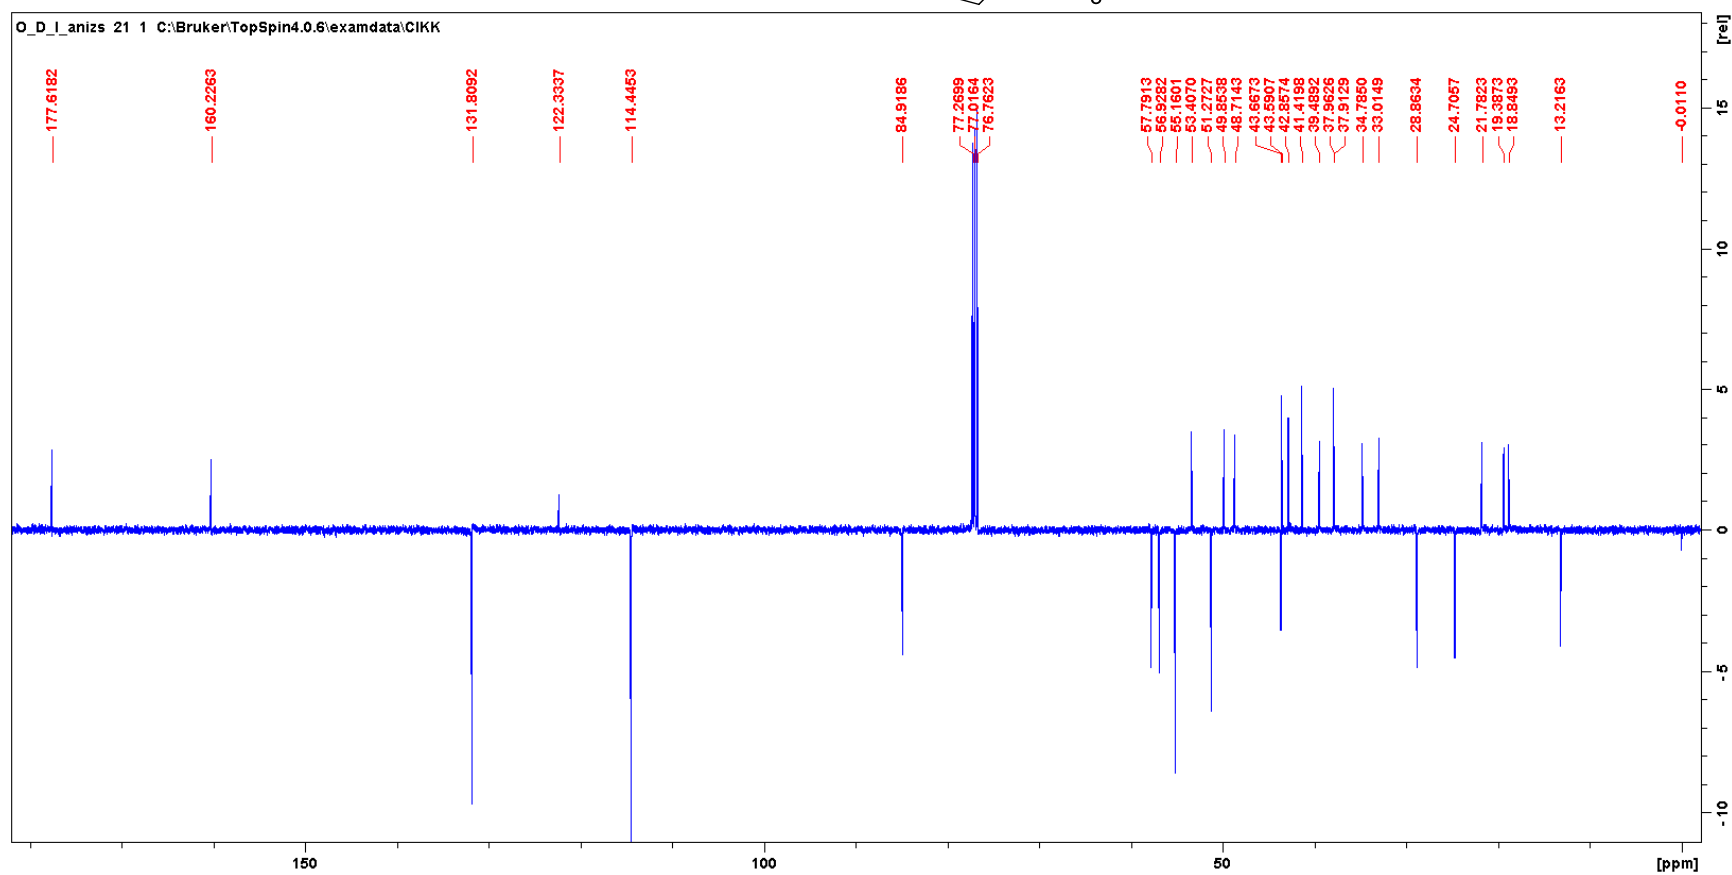

COSY of compound (4*R*,6*aS*,8*R*,9*S*,11*bS*)-Methyl 8-hydroxy-7-(((4-methoxybenzyl)amino)methyl)-4,9,11*b*-trimethyltetradecahydro-6*a*,9-methanocyclohepta[*a*]naphthalene-4-carboxylate (**11**)

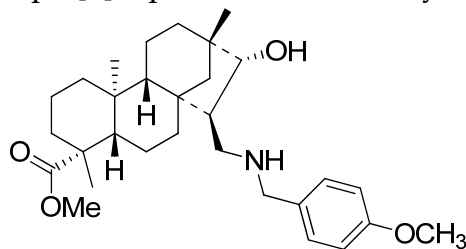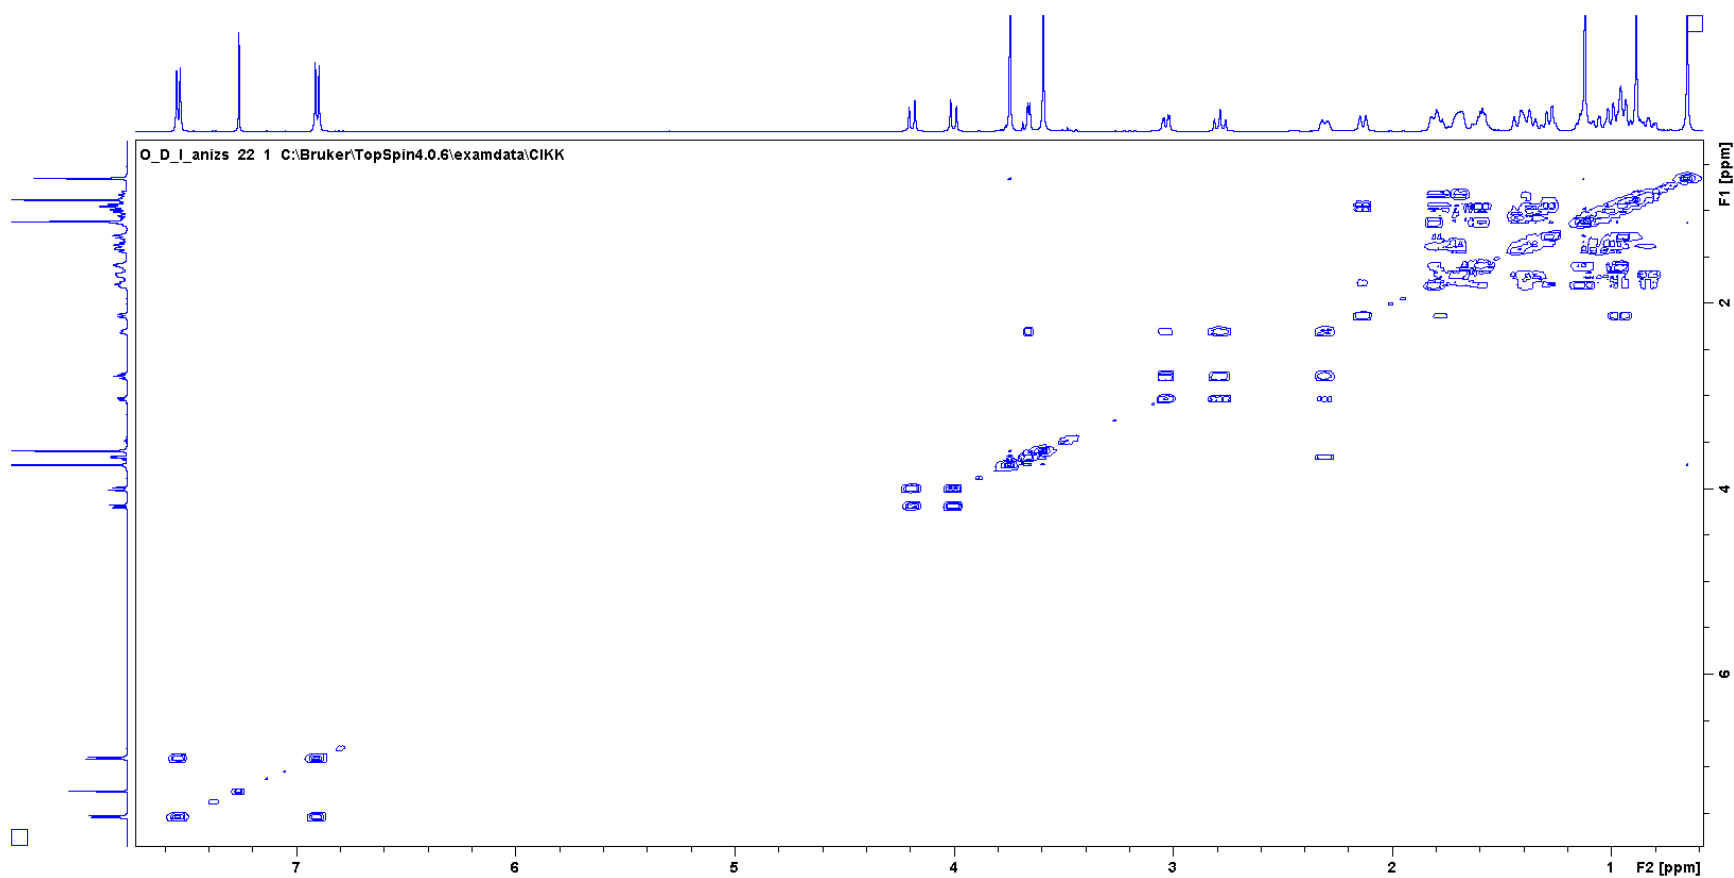

HSQC of compound (4*R*,6*aS*,8*R*,9*S*,11*bS*)-Methyl 8-hydroxy-7-(((4-methoxybenzyl)amino)methyl)-4,9,11*b*-trimethyltetradecahydro-6*a*,9-methanocyclohepta[*a*]naphthalene-4-carboxylate (**11**)

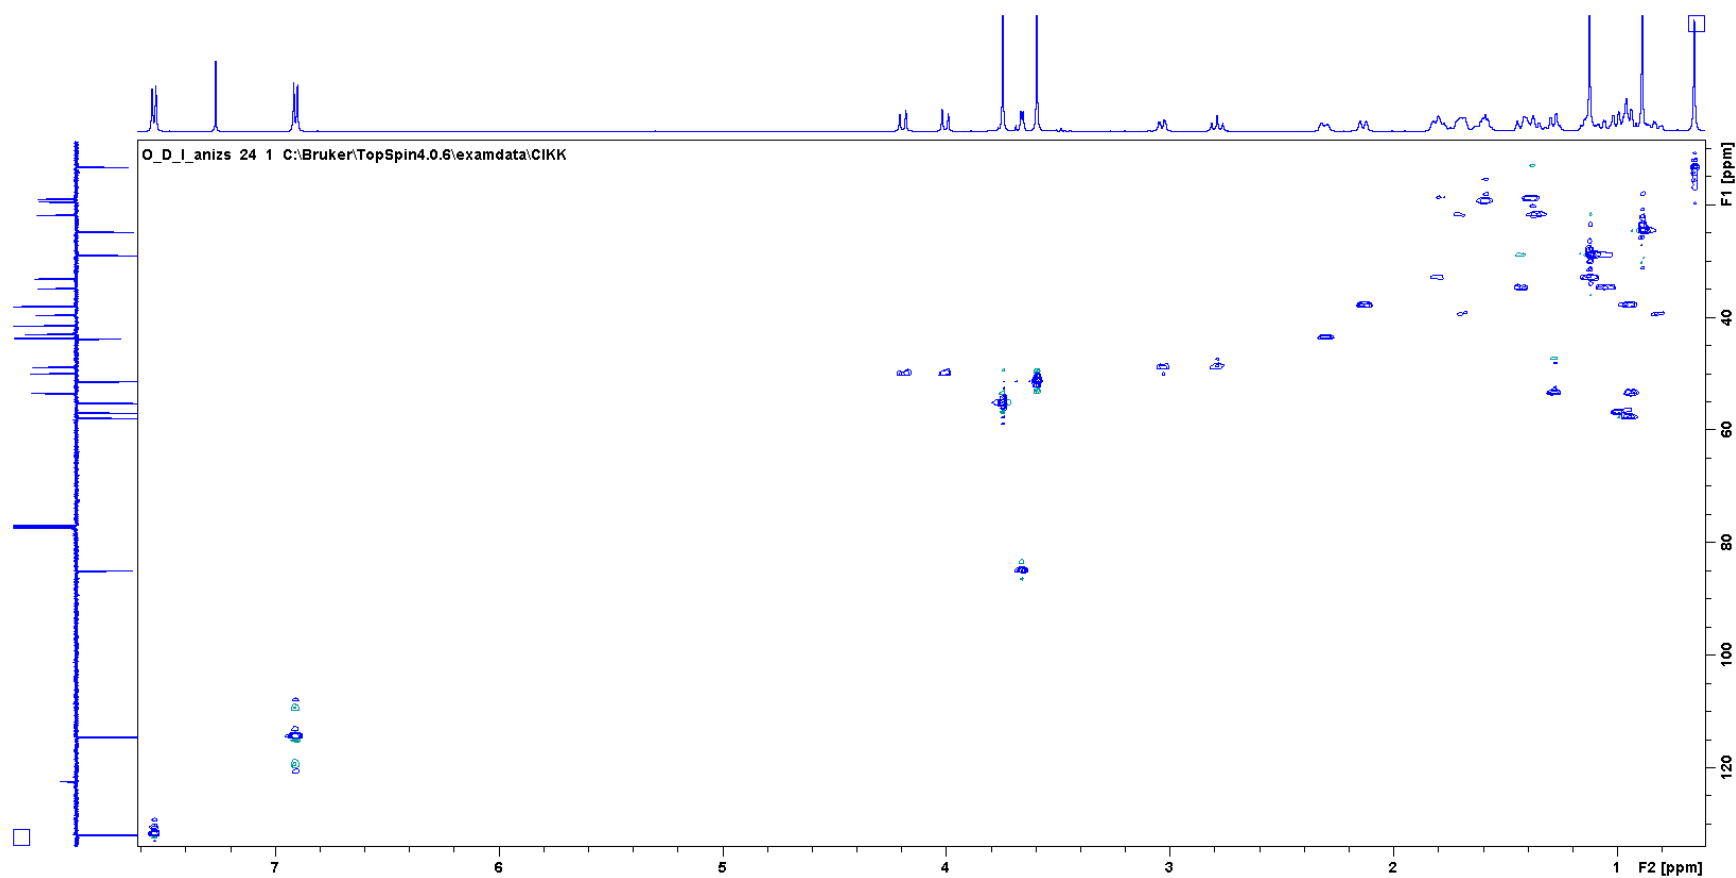

HMBC of compound (4*R*,6*aS*,8*R*,9*S*,11*bS*)-Methyl 8-hydroxy-7-(((4-methoxybenzyl)amino)methyl)-4,9,11*b*-trimethyltetradecahydro-6*a*,9-methanocyclohepta[*a*]naphthalene-4-carboxylate (**11**)

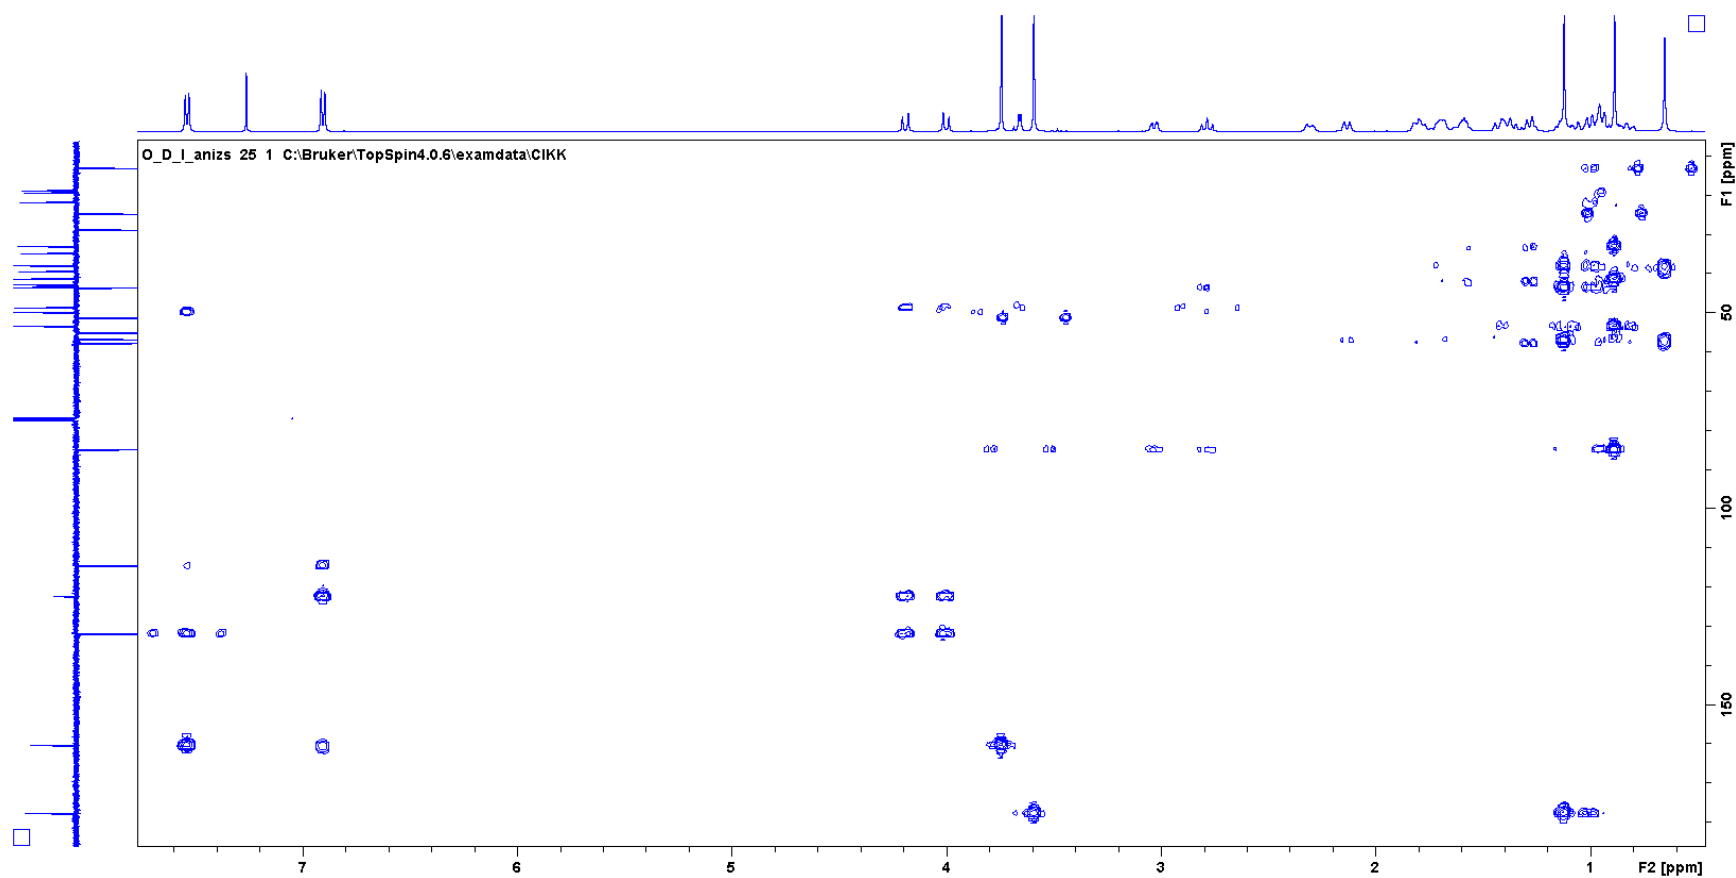



<sup>1</sup>H-NMR of compound (4*R*,6*aS*,8*R*,9*S*,11*bS*)-Methyl 7-(((4-fluorobenzyl)amino)methyl)-8-hydroxy-4,9,11*b*-trimethyltetradecahydro-6*a*,9-methanocyclohepta[*a*]naphthalene-4-carboxylate (**12**)

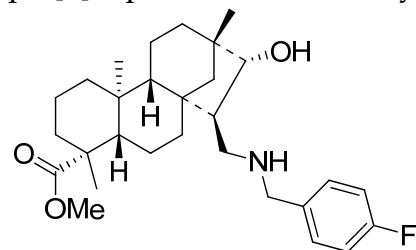

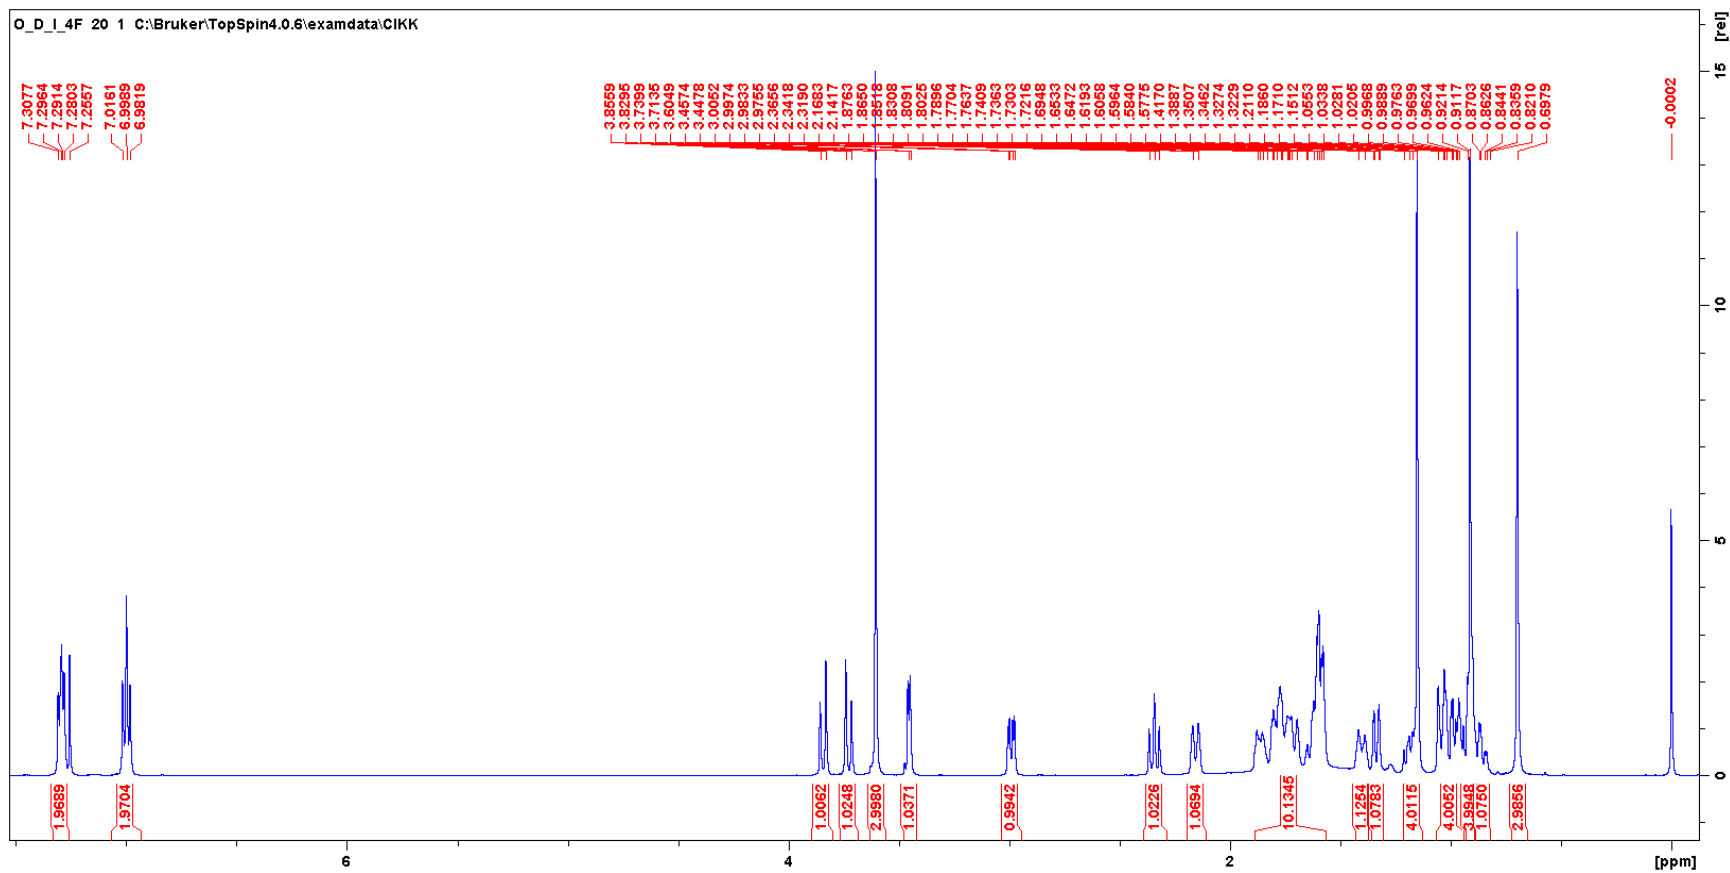

$^{13}\text{C}$ -NMR of compound (4*R*,6*aS*,8*R*,9*S*,11*bS*)-Methyl 7-(((4-fluorobenzyl)amino)methyl)-8-hydroxy-4,9,11*b*-trimethyltetradecahydro-6*a*,9-methanocyclohepta[*a*]naphthalene-4-carboxylate (**12**)

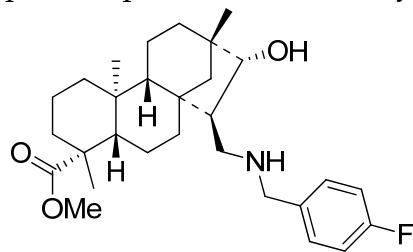

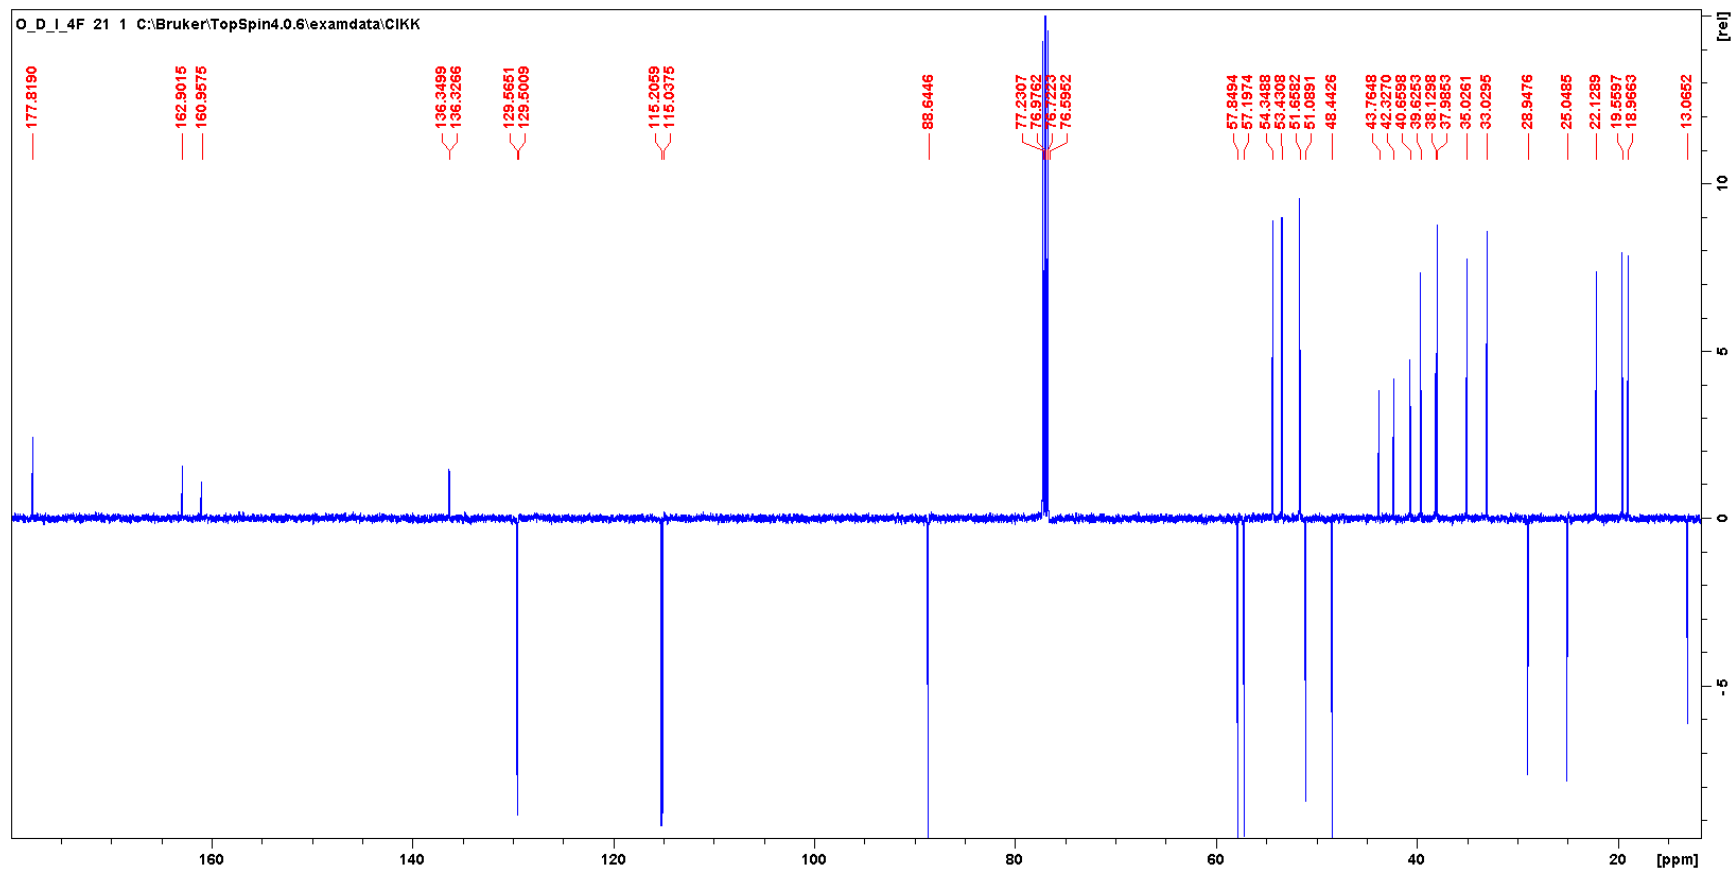

COSY of compound (4*R*,6*aS*,8*R*,9*S*,11*bS*)-Methyl 7-(((4-fluorobenzyl)amino)methyl)-8-hydroxy-4,9,11*b*-trimethyltetradecahydro-6*a*,9-methanocyclohepta[*a*]naphthalene-4-carboxylate (**12**)

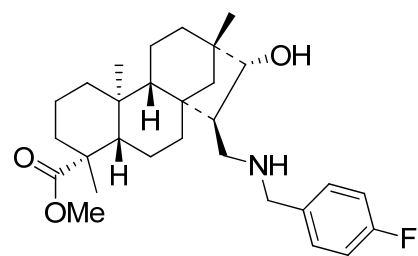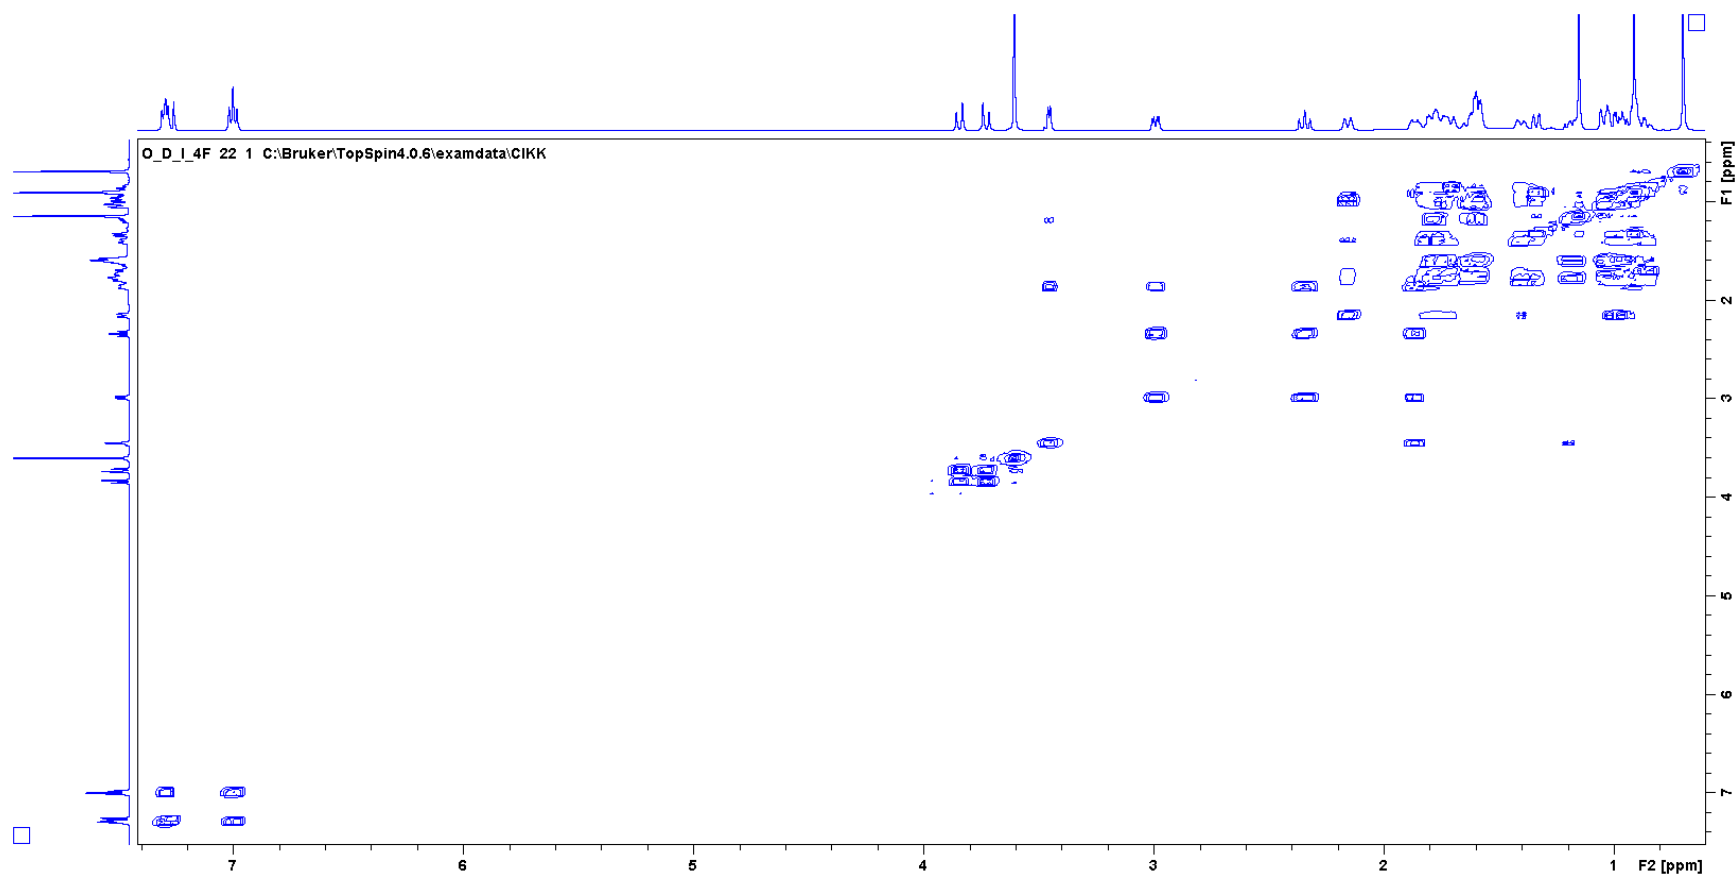

NOESY of compound (4*R*,6*aS*,8*R*,9*S*,11*bS*)-Methyl 7-(((4-fluorobenzyl)amino)methyl)-8-hydroxy-4,9,11*b*-trimethyltetradecahydro-6*a*,9-methanocyclohepta[*a*]naphthalene-4-carboxylate (**12**)

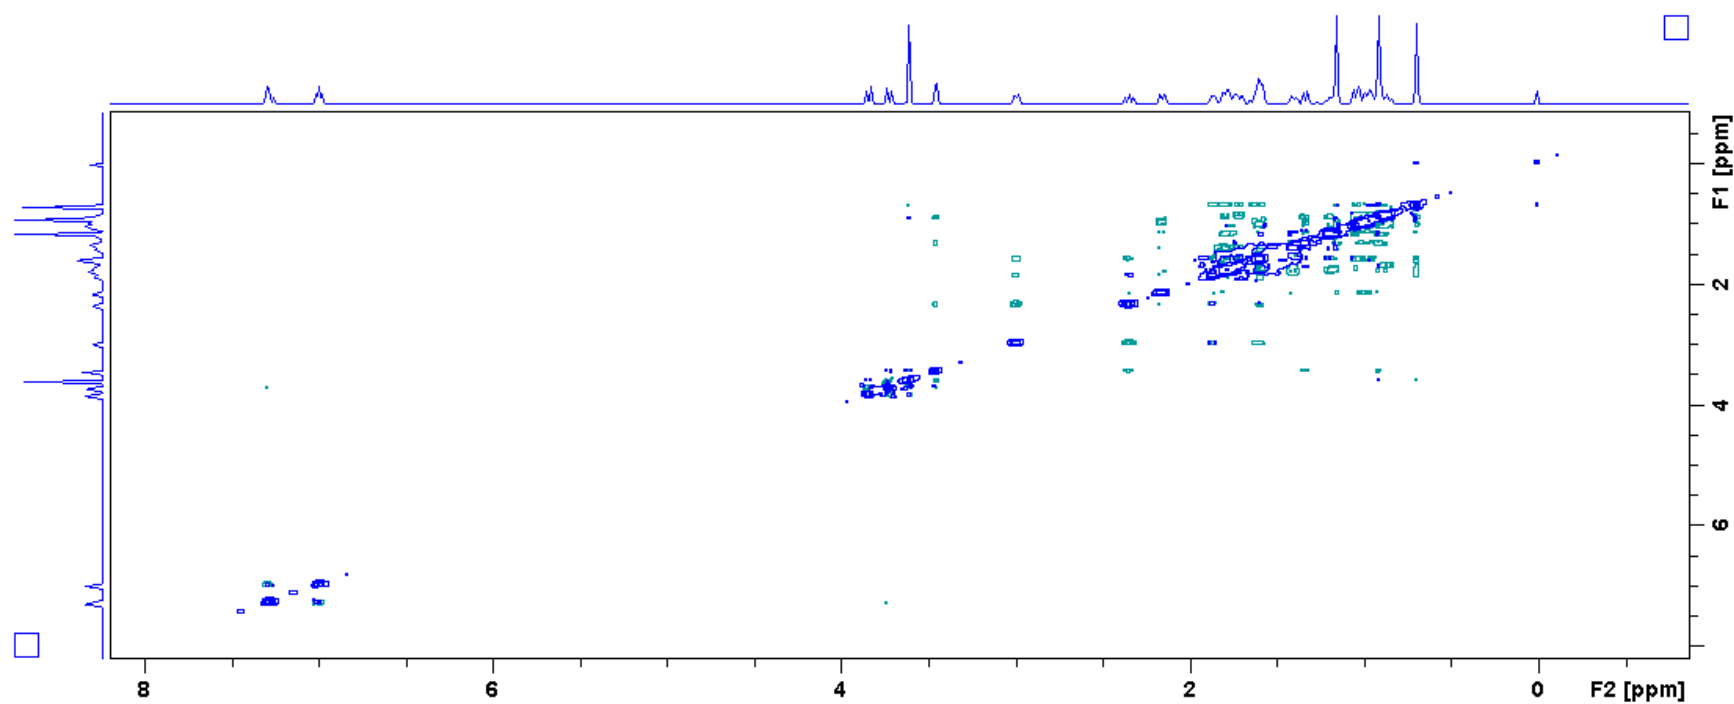

HSQC of compound (4*R*,6*aS*,8*R*,9*S*,11*bS*)-Methyl 7-(((4-fluorobenzyl)amino)methyl)-8-hydroxy-4,9,11b-trimethyltetradecahydro-6*a*,9-methanocyclohepta[*a*]naphthalene-4-carboxylate (**12**)



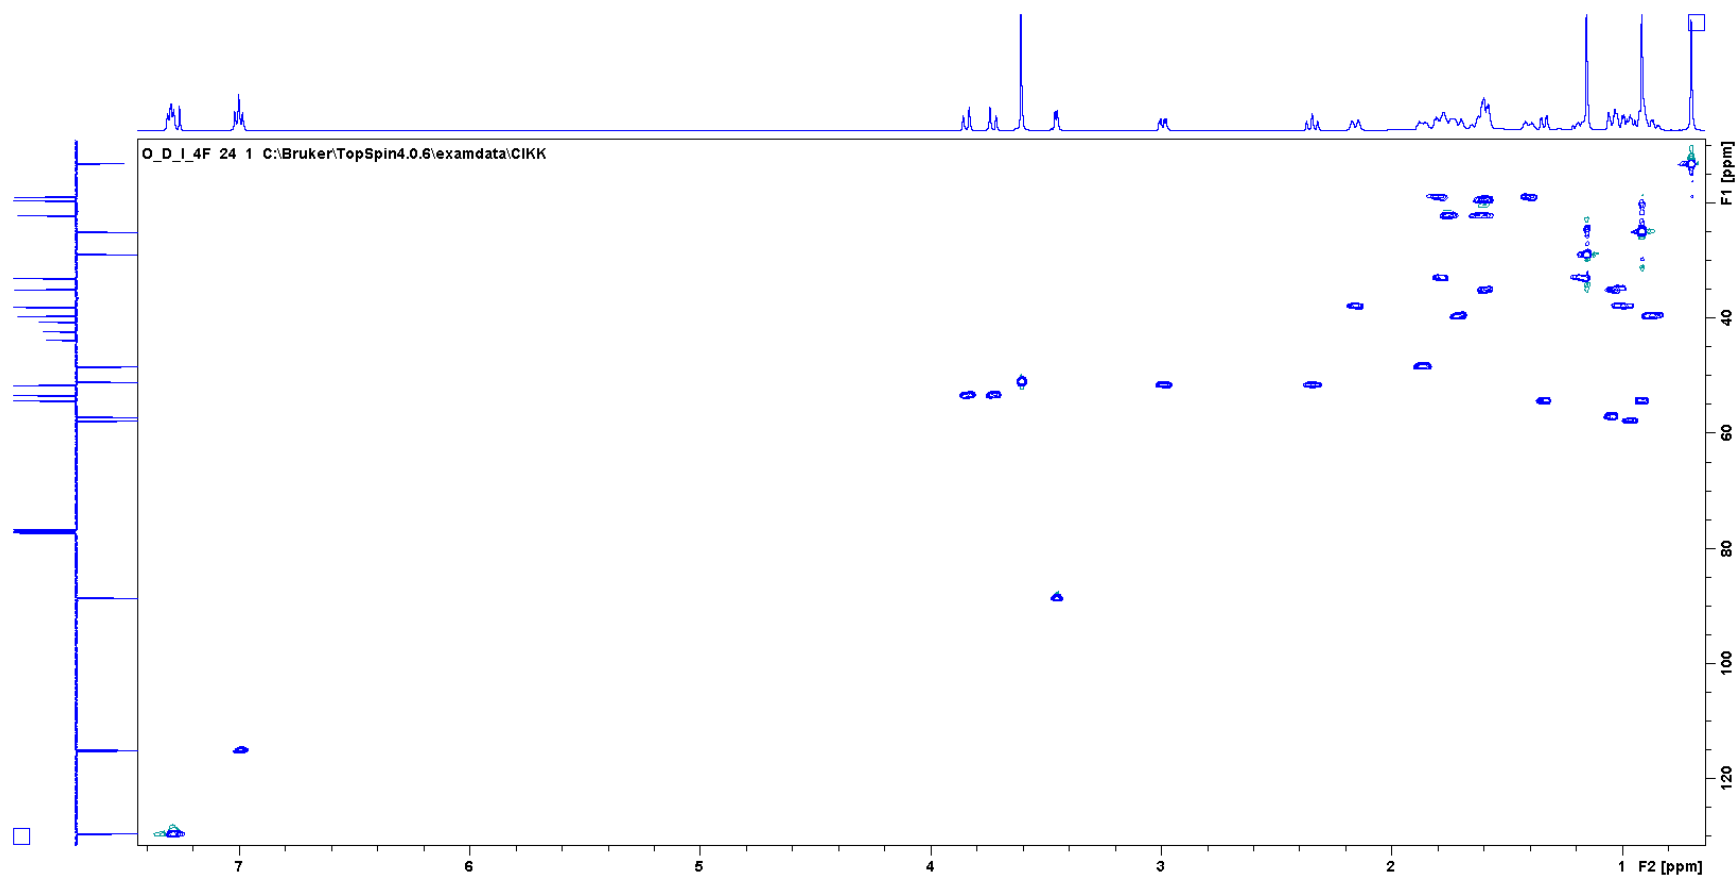

HMBC of compound (4*R*,6*aS*,8*R*,9*S*,11*bS*)-Methyl 7-(((4-fluorobenzyl)amino)methyl)-8-hydroxy-4,9,11*b*-trimethyltetradecahydro-6*a*,9-methanocyclohepta[*a*]naphthalene-4-carboxylate (**12**)

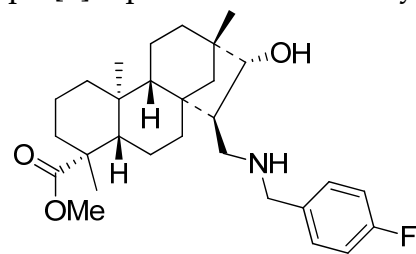

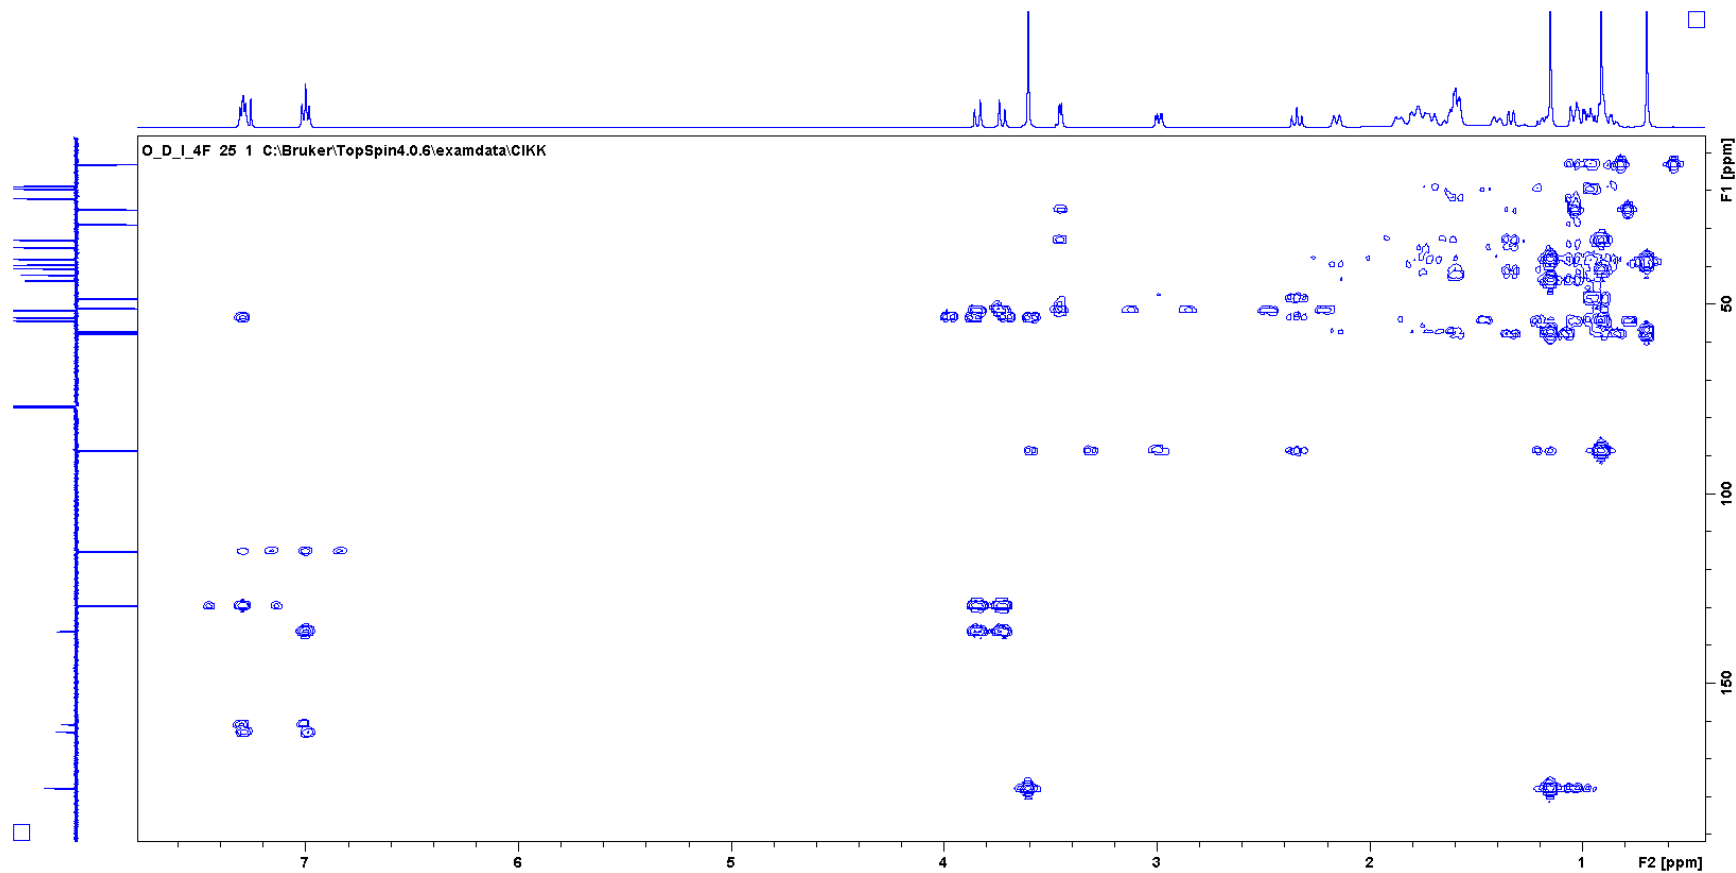

$^{19}\text{F}$ -NMR of compound (4*R*,6*aS*,8*R*,9*S*,11*bS*)-Methyl 7-(((4-fluorobenzyl)amino)methyl)-8-hydroxy-4,9,11*b*-trimethyltetradecahydro-6*a*,9-methanocyclohepta[*a*]naphthalene-4-carboxylate (**12**)



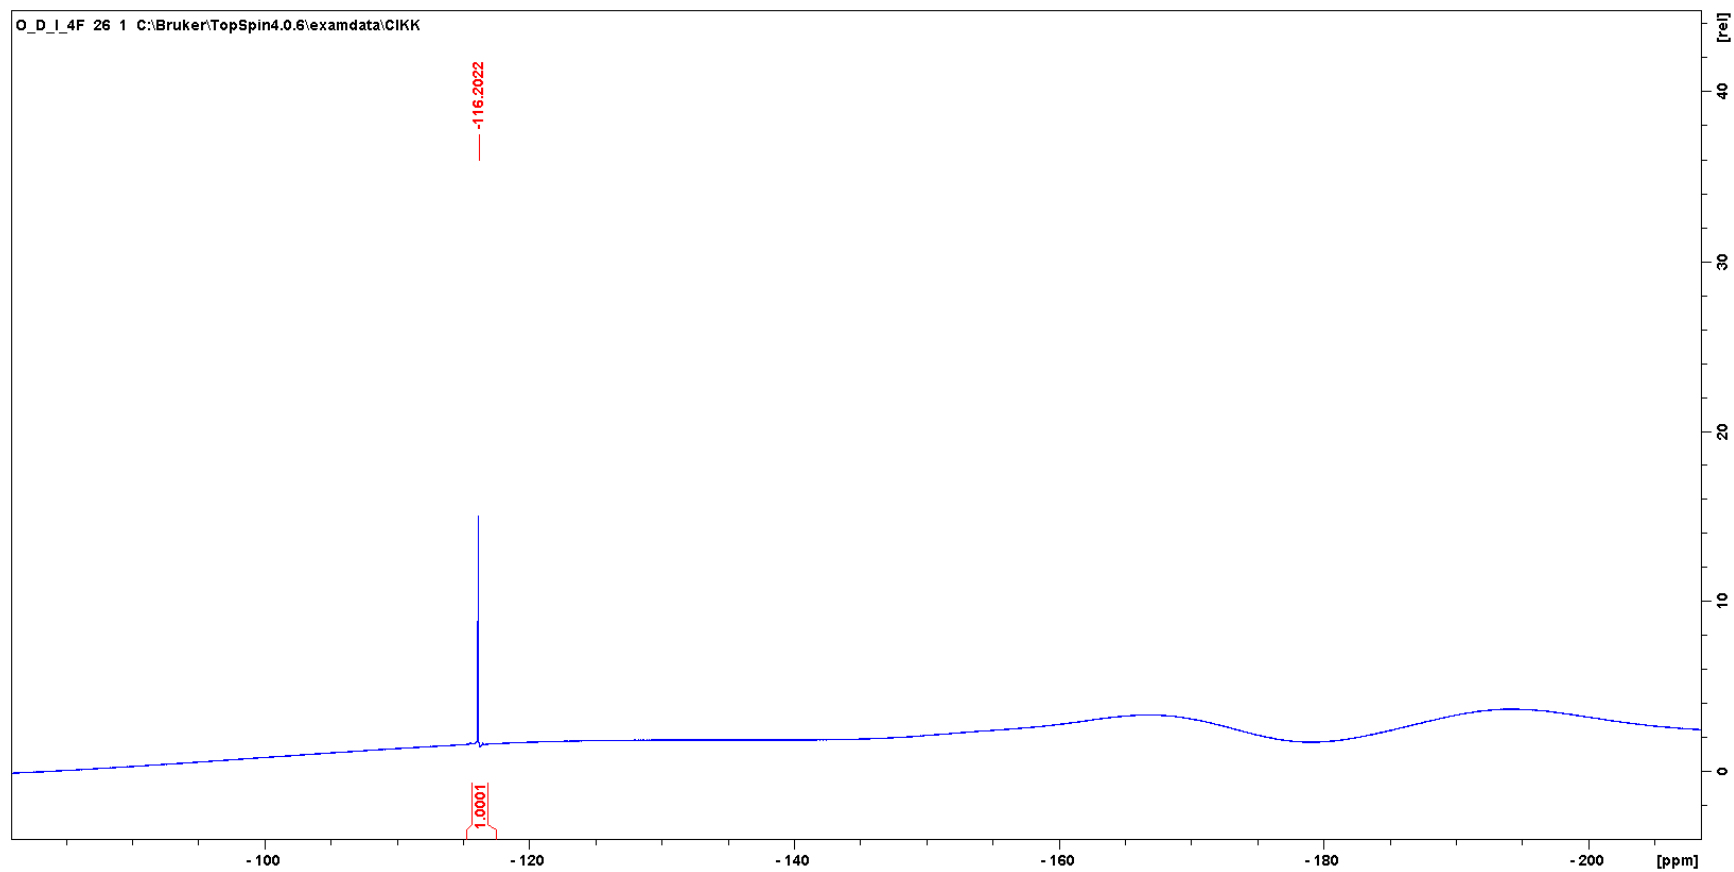

<sup>1</sup>H-NMR of compound (4*R*,6*aS*,9*S*,11*bS*)-Methyl 4,9,11*b*-trimethyl-7-(morpholinomethyl)-8-oxotetradecahydro-6*a*,9-methanocyclohepta[*a*]naphthalene-4-carboxylate (**14**)

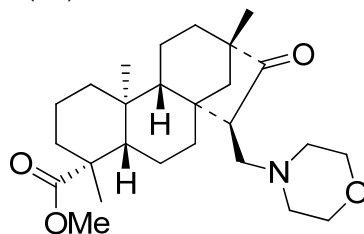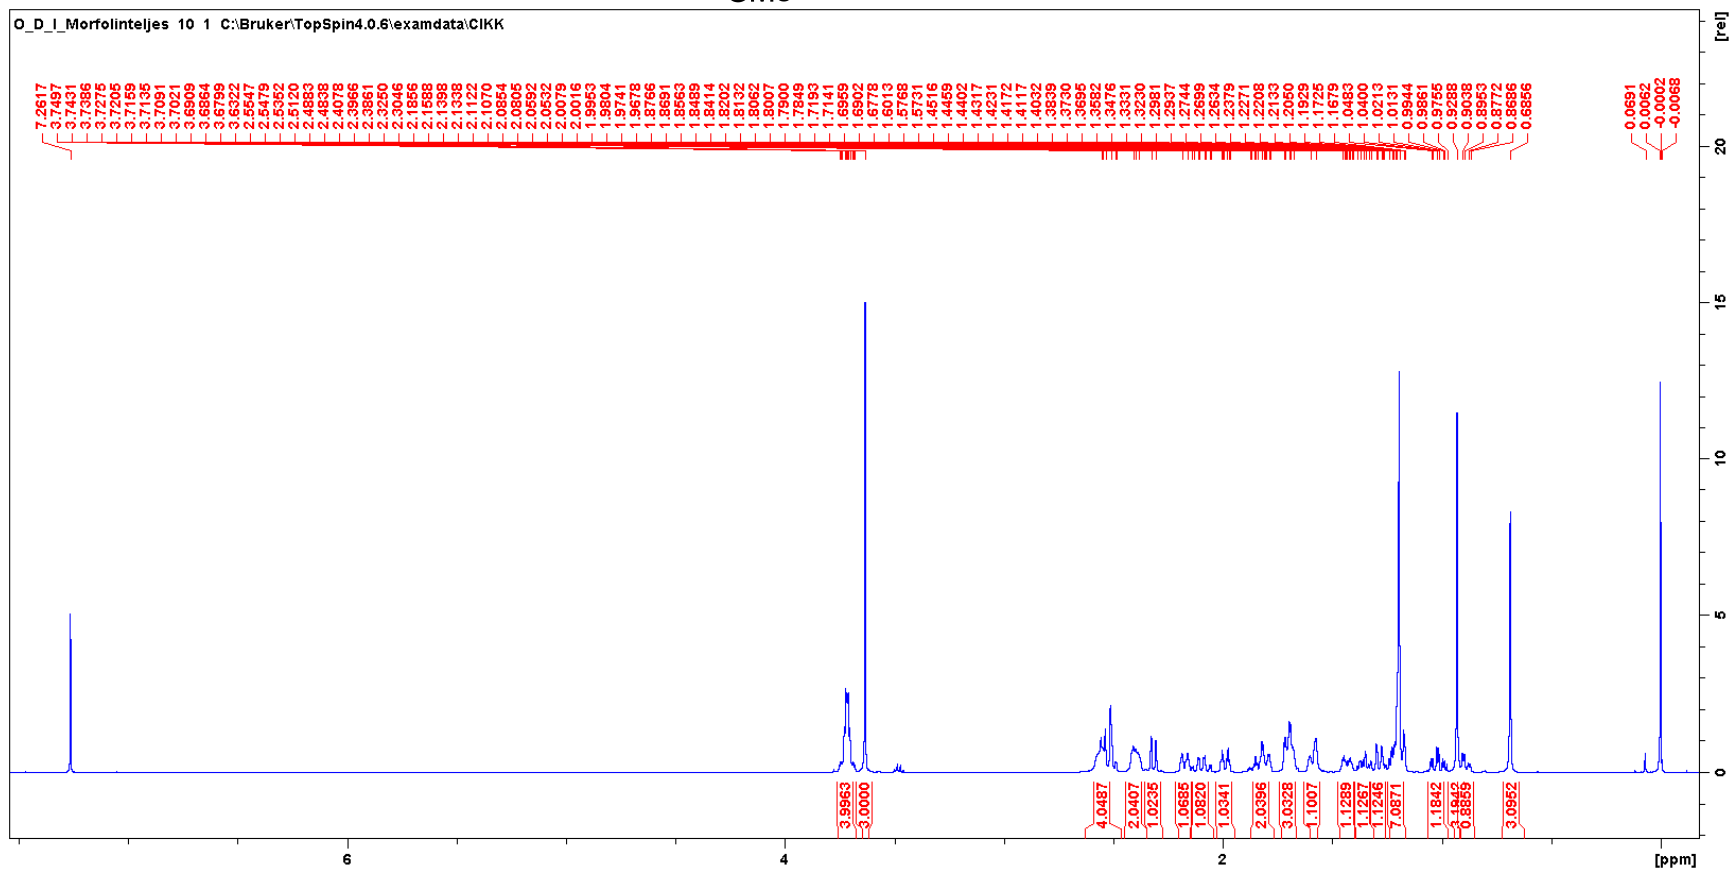

$^{13}\text{C}$ -NMR of compound (4*R*,6*aS*,9*S*,11*bS*)-Methyl 4,9,11*b*-trimethyl-7-(morpholinomethyl)-8-oxotetradecahydro-6*a*,9-methanocyclohepta[*a*]naphthalene-4-carboxylate (**14**)

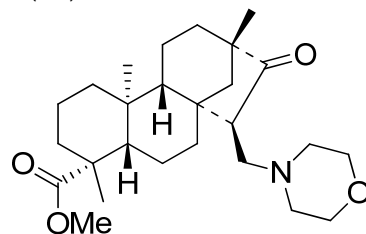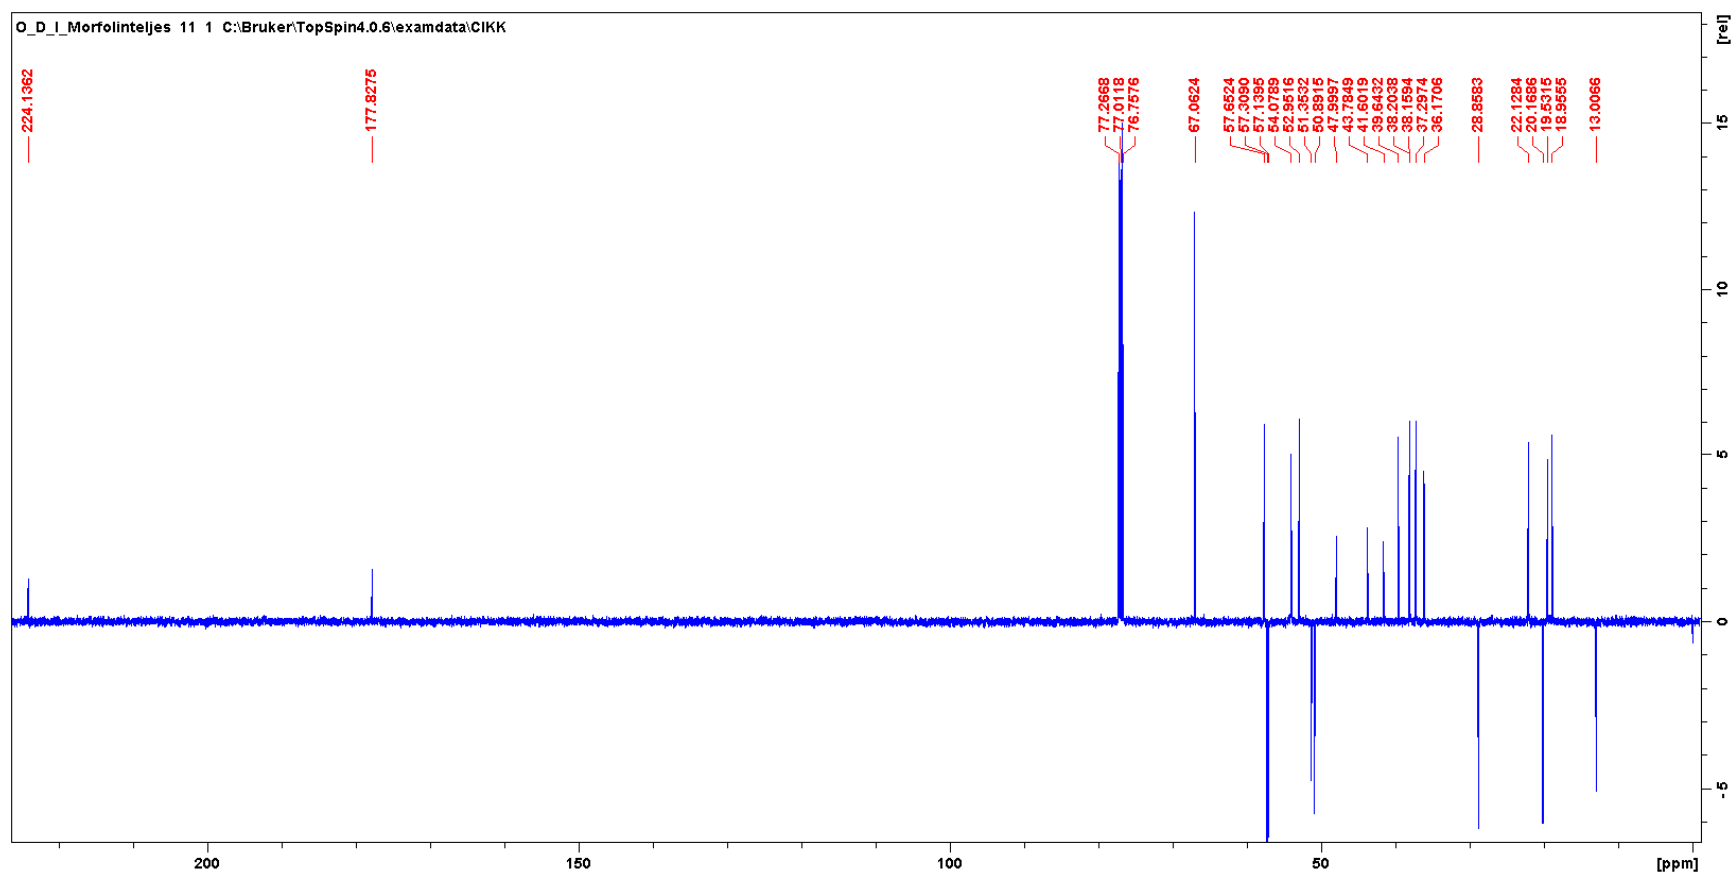

COSY of compound (4*R*,6*aS*,9*S*,11*bS*)-Methyl 4,9,11*b*-trimethyl-7-(morpholinomethyl)-8-oxotetradecahydro-6*a*,9-methanocyclohepta[*a*]naphthalene-4-carboxylate (**14**)

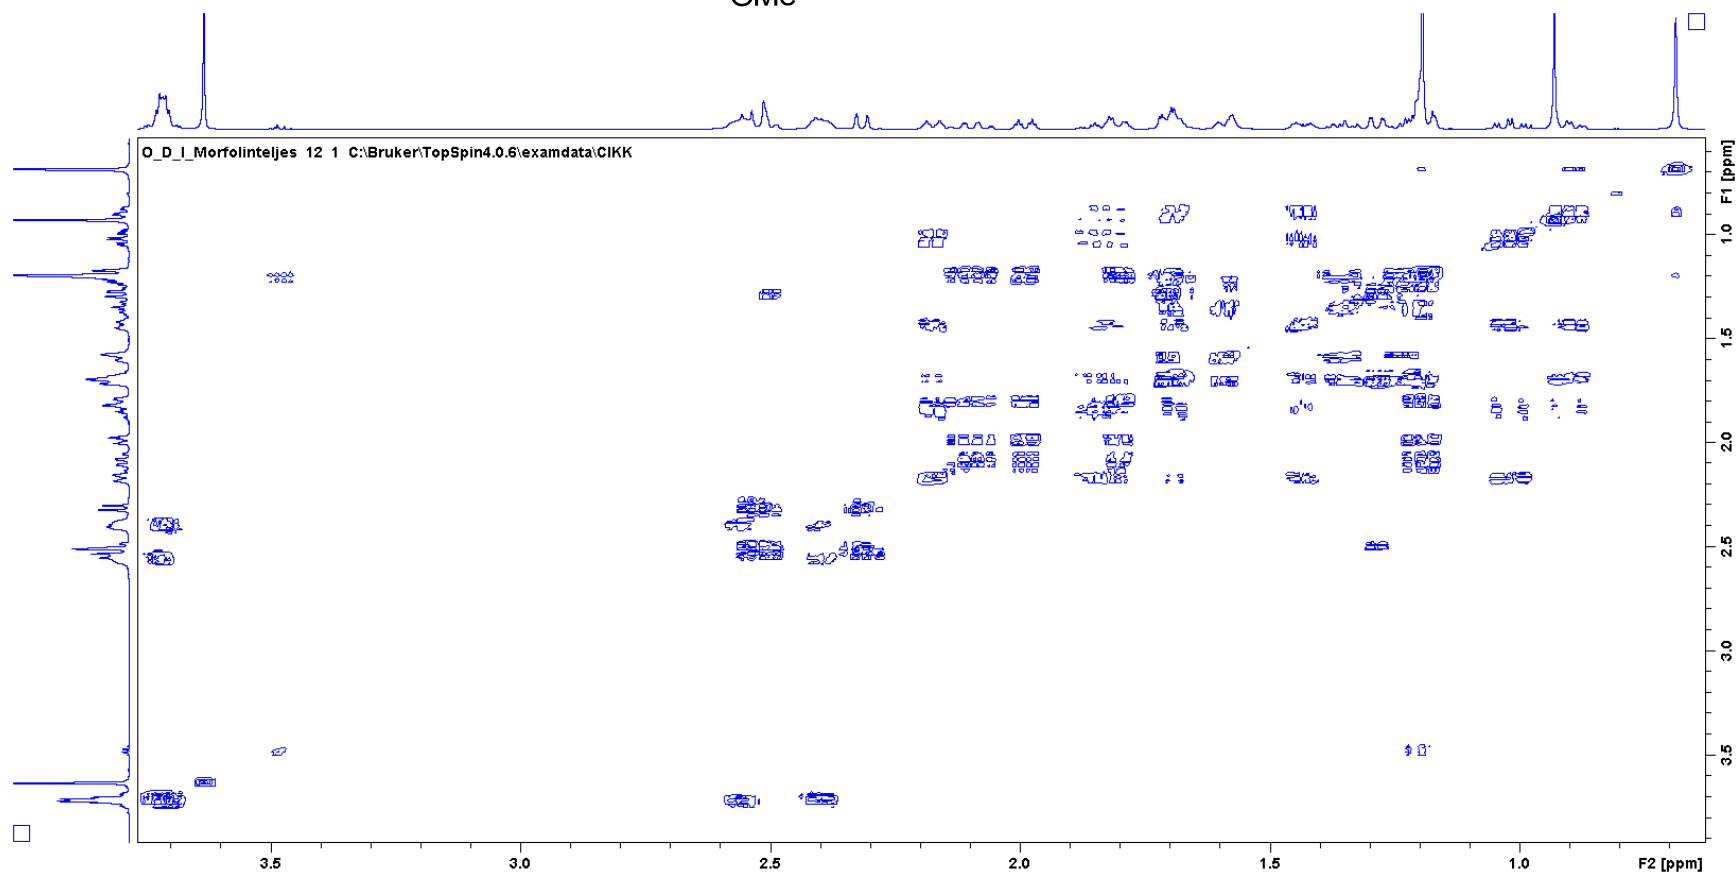

NOESY of compound (4*R*,6*aS*,9*S*,11*bS*)-Methyl 4,9,11*b*-trimethyl-7-(morpholinomethyl)-8-oxotetradecahydro-6*a*,9-methanocyclohepta[*a*]naphthalene-4-carboxylate (**14**)

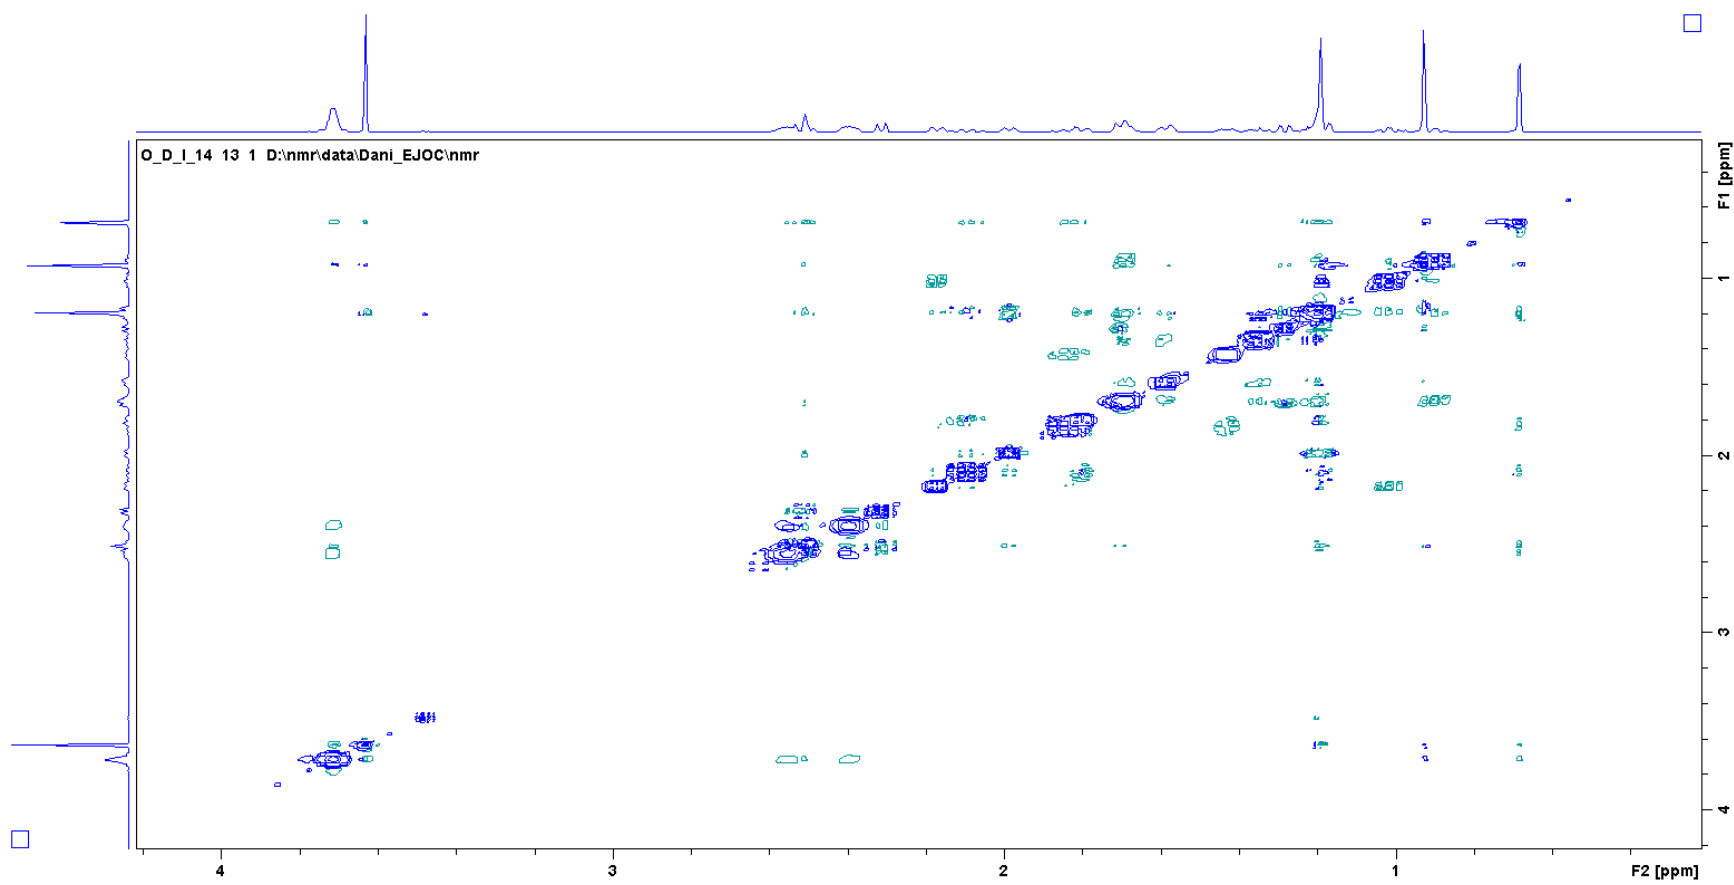

HSQC of compound (4*R*,6*aS*,9*S*,11*bS*)-Methyl 4,9,11*b*-trimethyl-7-(morpholinomethyl)-8-oxotetradecahydro-6*a*,9-methanocyclohepta[*a*]naphthalene-4-carboxylate (**14**)

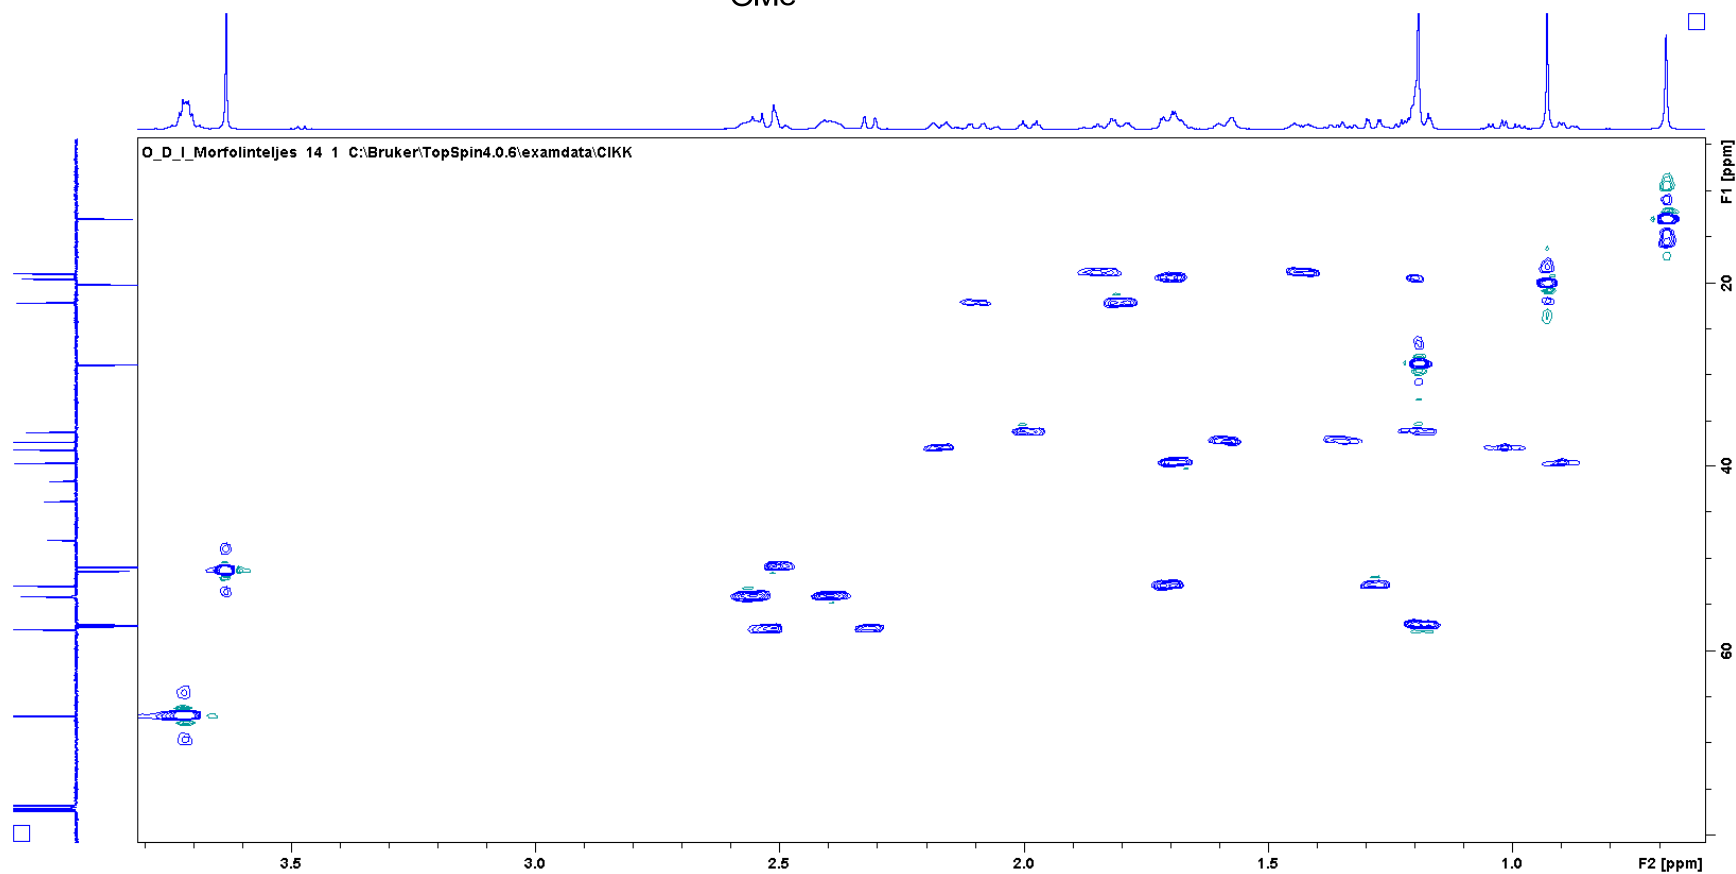

HMBC of compound (4*R*,6*aS*,9*S*,11*bS*)-Methyl 4,9,11*b*-trimethyl-7-(morpholinomethyl)-8-oxotetradecahydro-6*a*,9-methanocyclohepta[*a*]naphthalene-4-carboxylate (**14**)

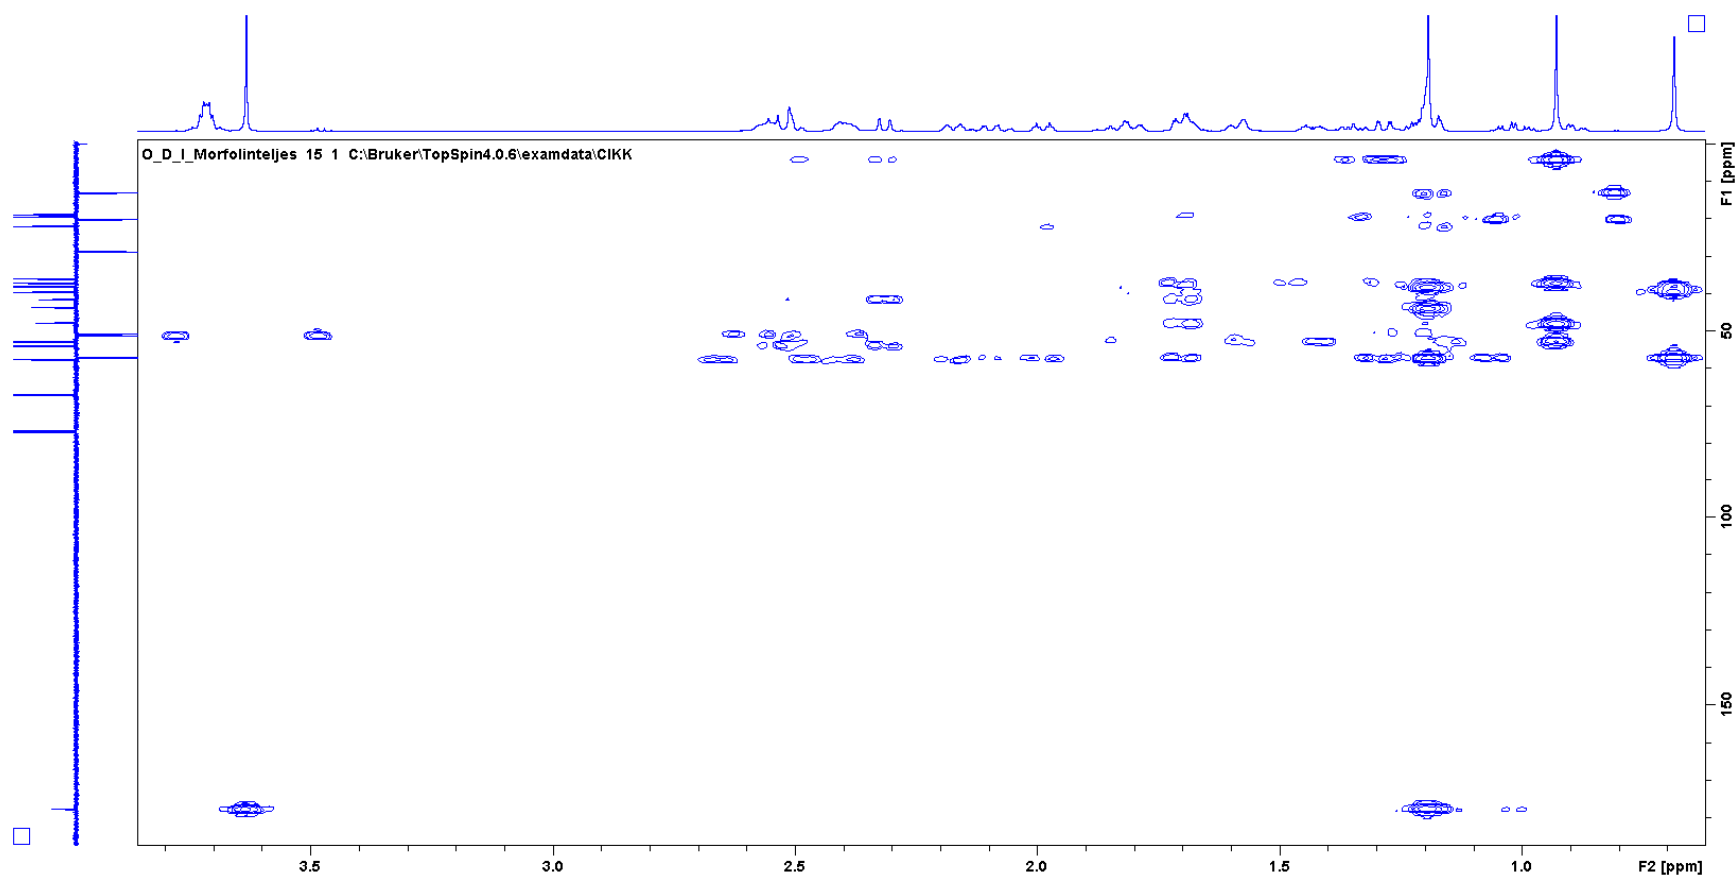

<sup>1</sup>H-NMR of compound (4*R*,6*aS*,9*S*,11*bS*)-Methyl 7-((benzyl(methyl)amino)methyl)-4,9,11*b*-trimethyl-8-oxotetradecahydro-6*a*,9-methanocyclohepta[*a*]naphthalene-4-carboxylate (**15**)

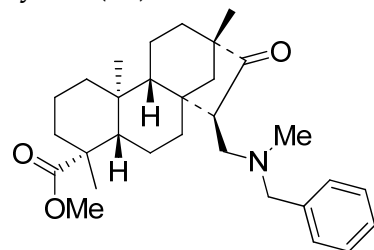



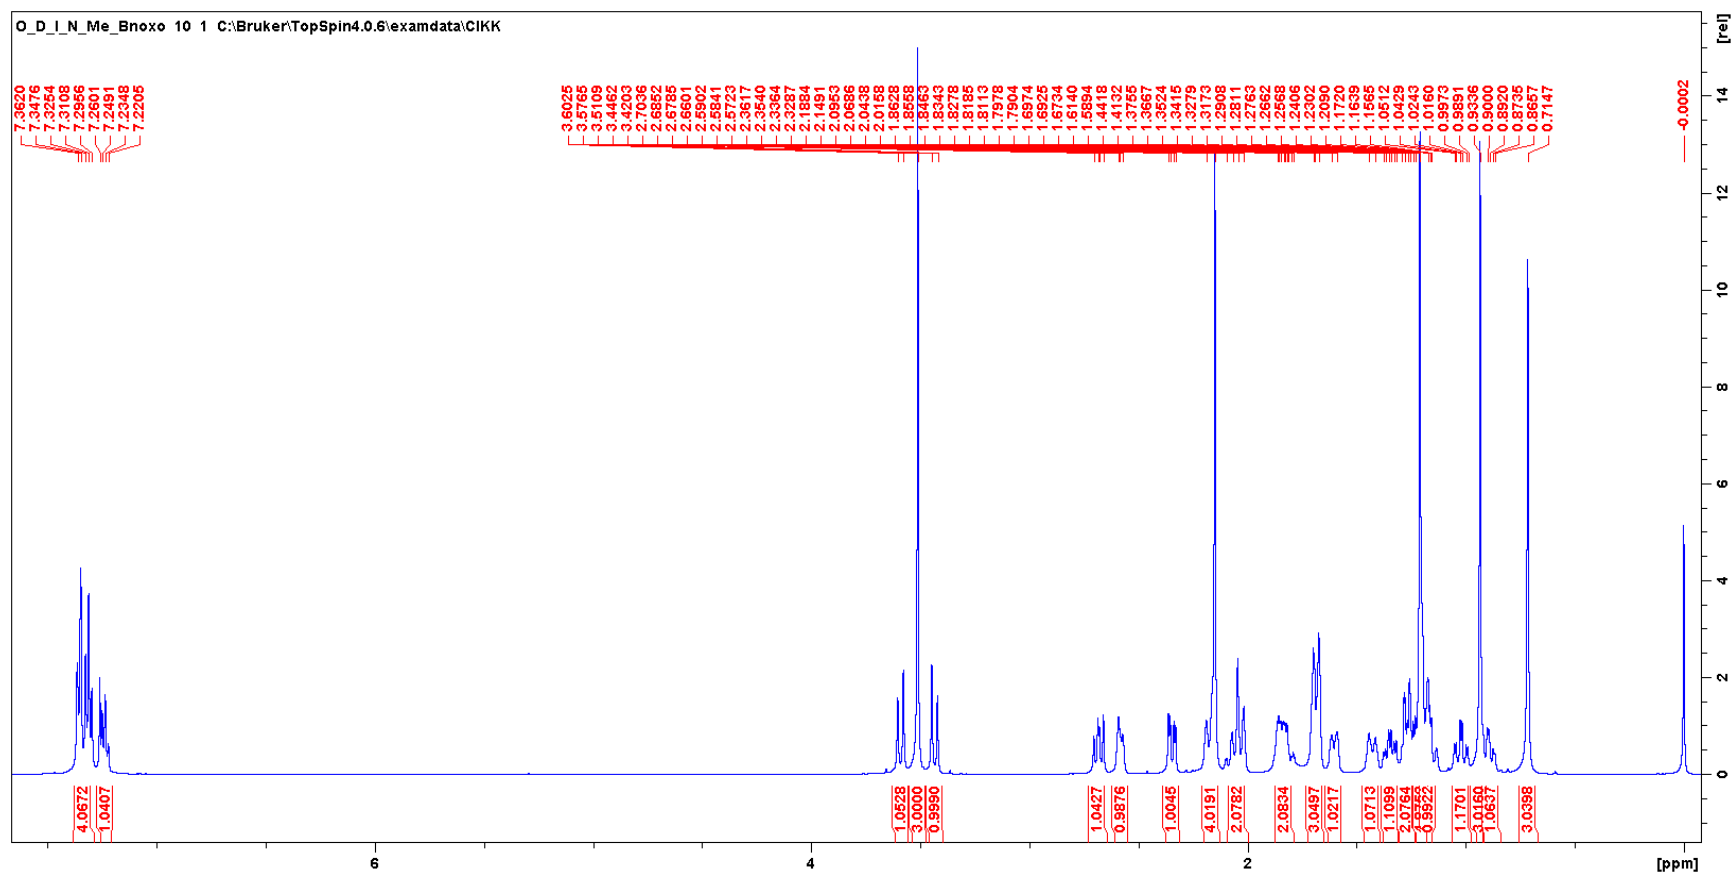

$^{13}\text{C}$ -NMR of compound (4*R*,6*aS*,9*S*,11*bS*)-Methyl 7-((benzyl(methyl)amino)methyl)-4,9,11*b*-trimethyl-8-oxotetradecahydro-6*a*,9-methanocyclohepta[*a*]naphthalene-4-carboxylate (**15**)

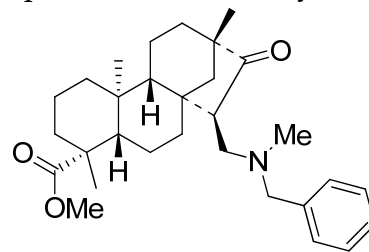

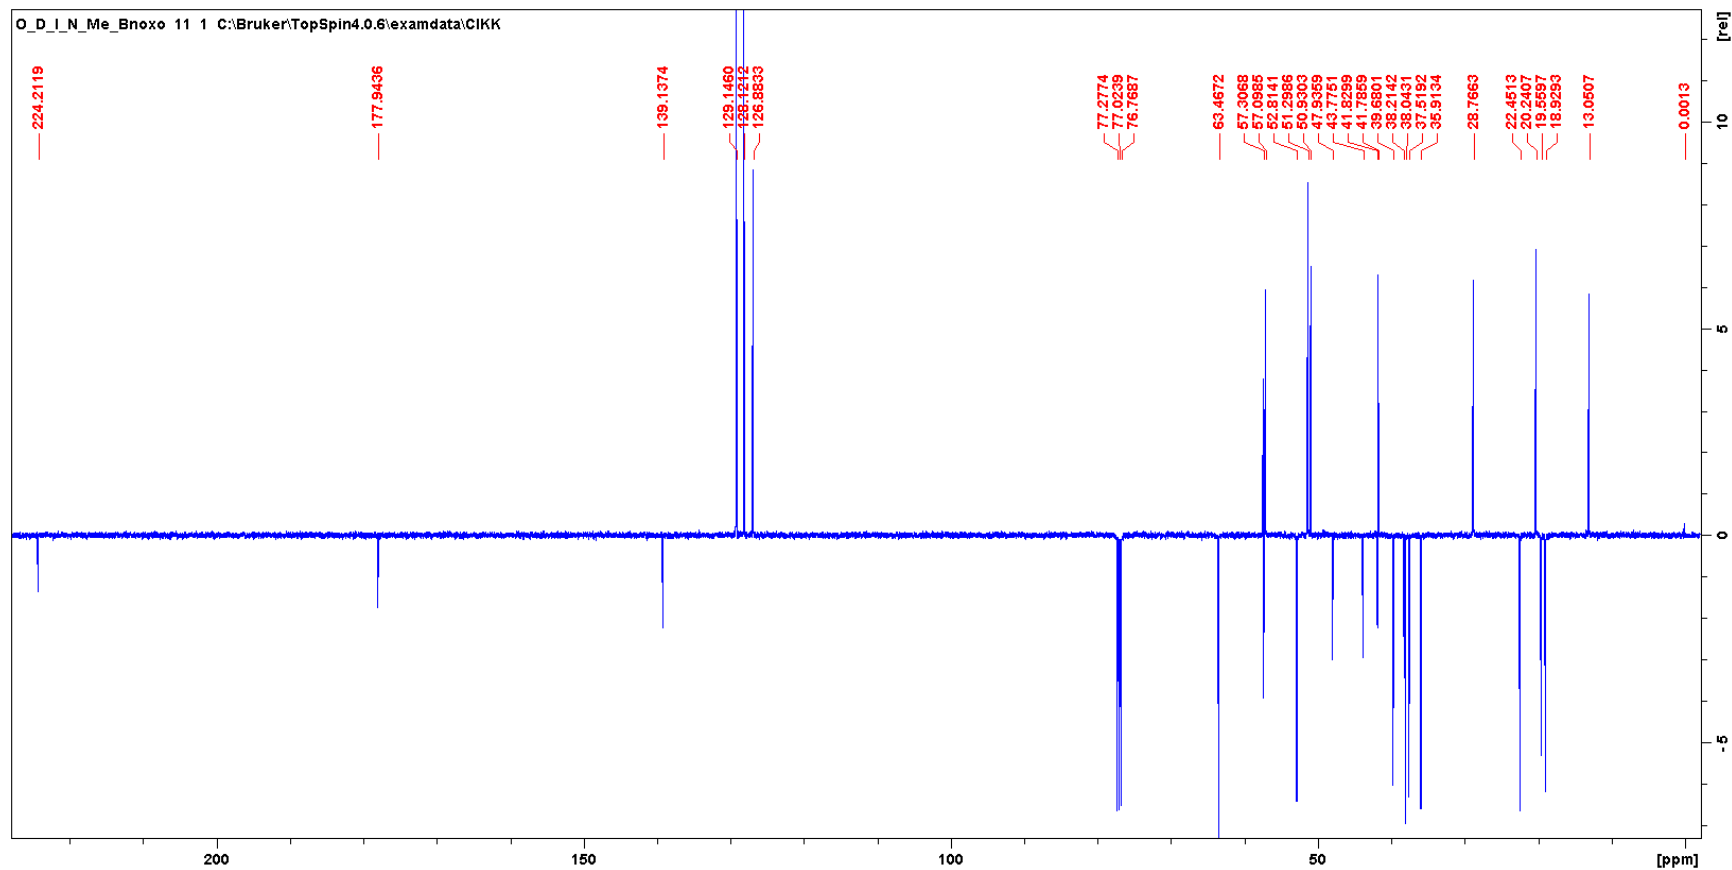

COSY of compound (4*R*,6*aS*,9*S*,11*bS*)-Methyl 7-((benzyl(methyl)amino)methyl)-4,9,11*b*-trimethyl-8-oxotetradecahydro-6*a*,9-methanocyclohepta[*a*]naphthalene-4-carboxylate (**15**)

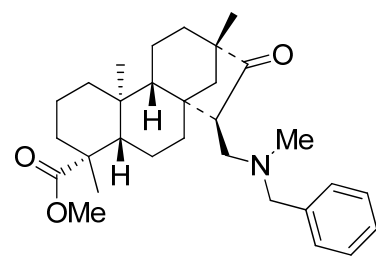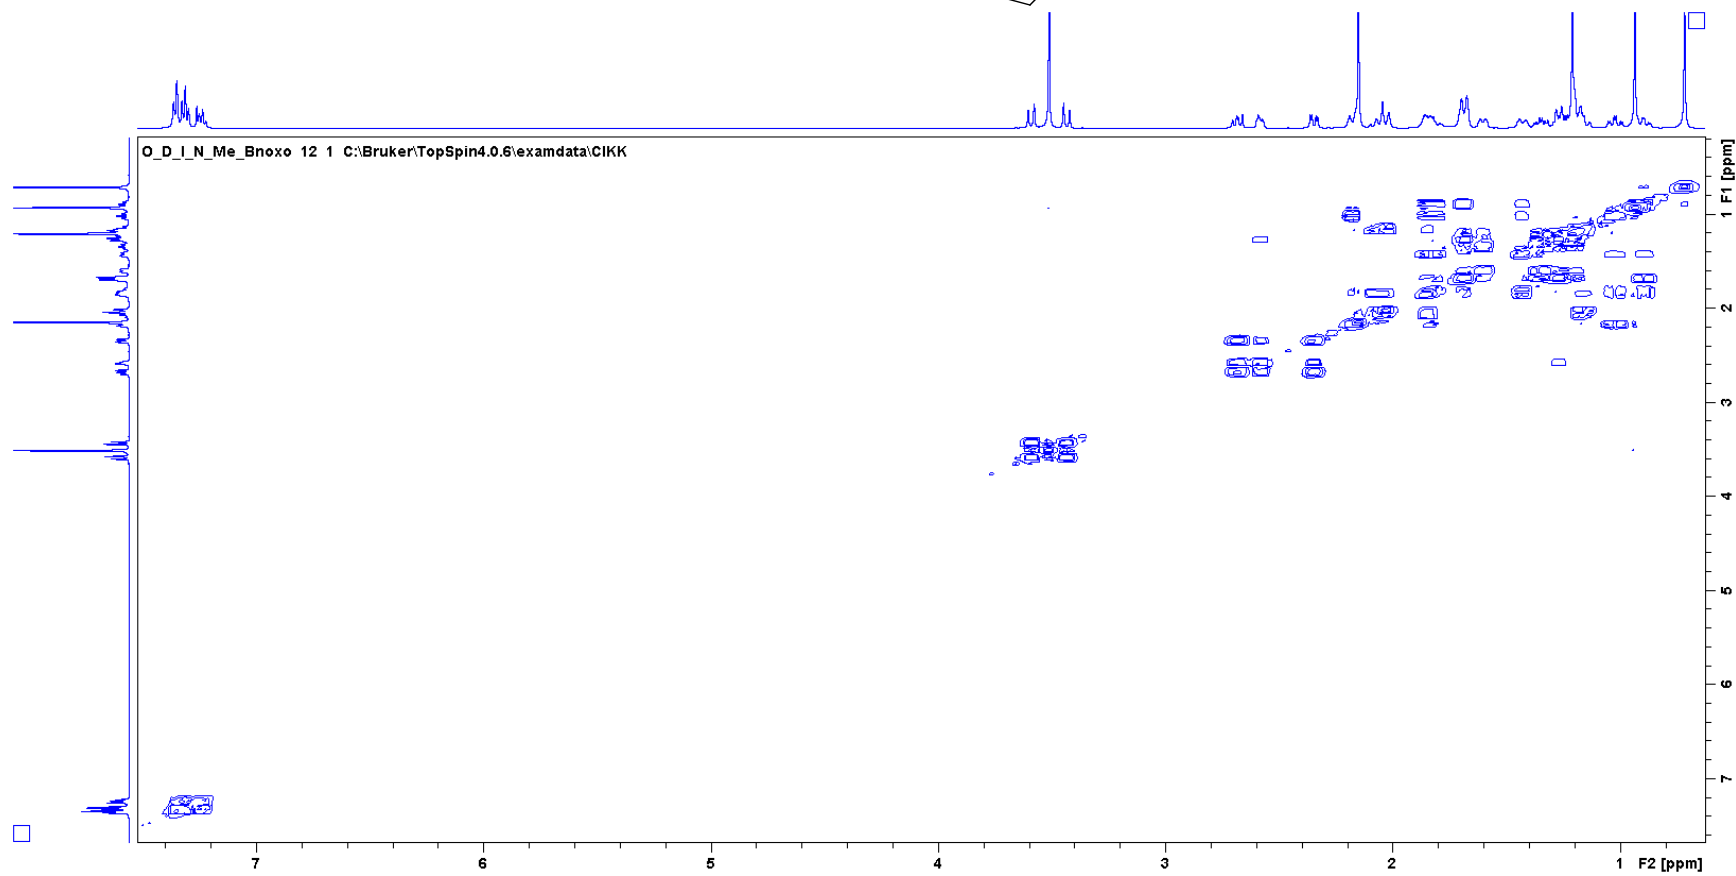

NOESY of compound (4*R*,6*aS*,9*S*,11*bS*)-Methyl 7-((benzyl(methyl)amino)methyl)-4,9,11*b*-trimethyl-8-oxotetradecahydro-6*a*,9-methanocyclohepta[*a*]naphthalene-4-carboxylate (**15**)

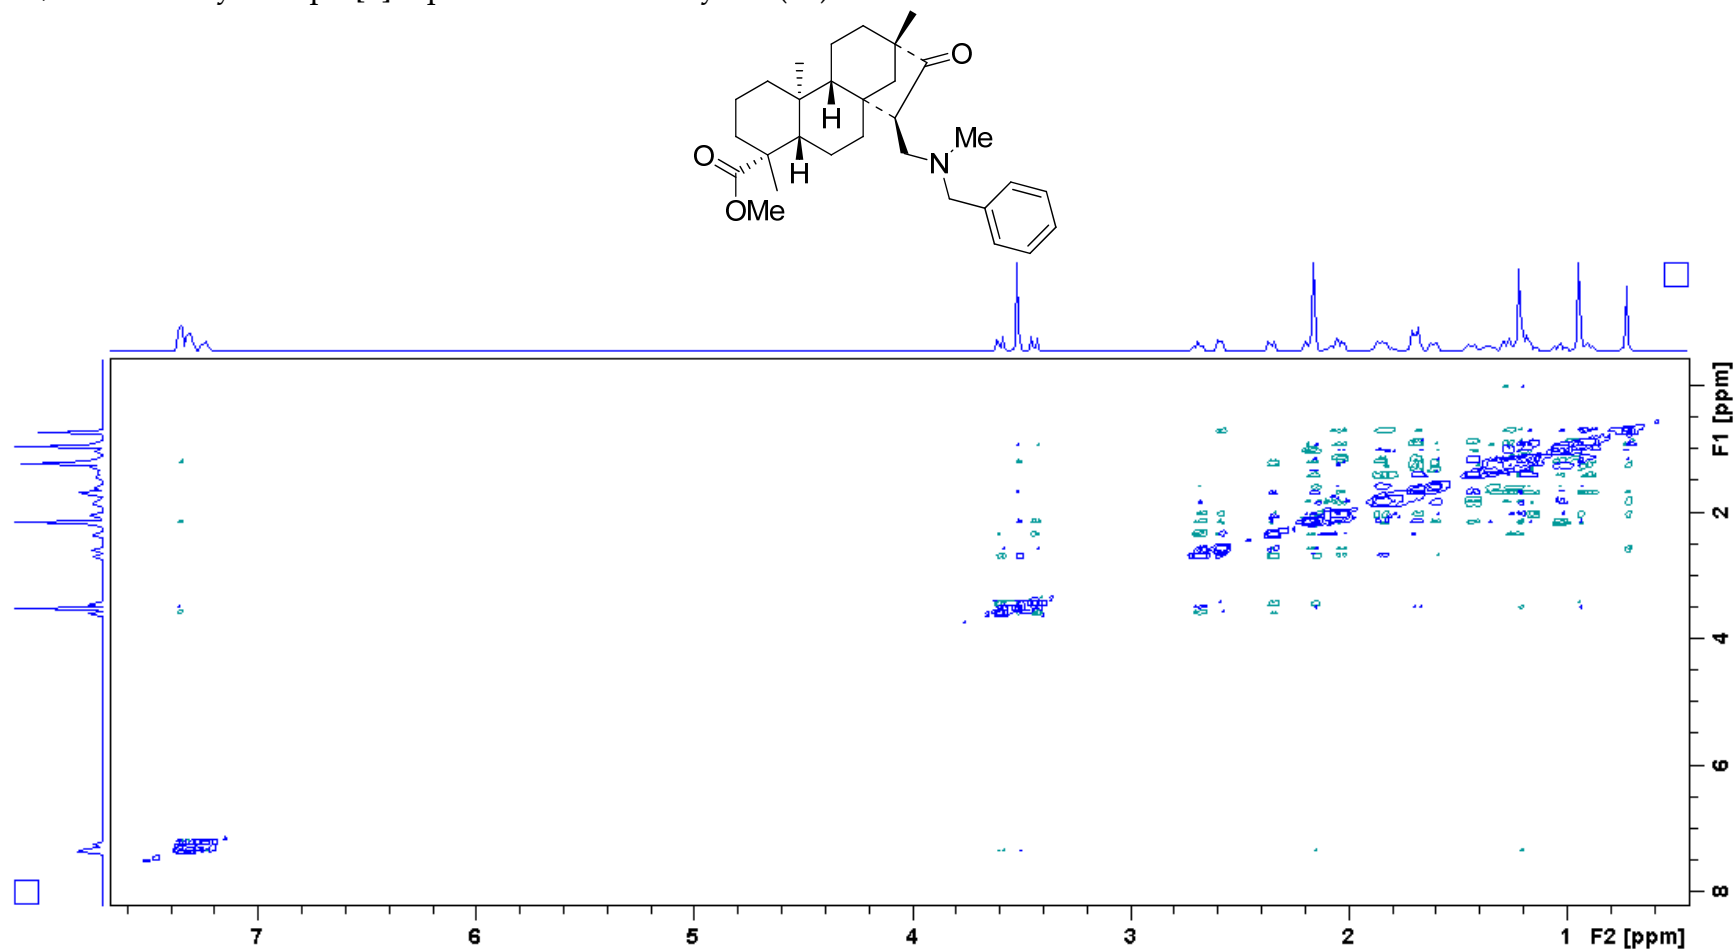

HSQC of compound (4*R*,6*aS*,9*S*,11*bS*)-Methyl 7-((benzyl(methyl)amino)methyl)-4,9,11*b*-trimethyl-8-oxotetradecahydro-6*a*,9-methanocyclohepta[*a*]naphthalene-4-carboxylate (**15**)

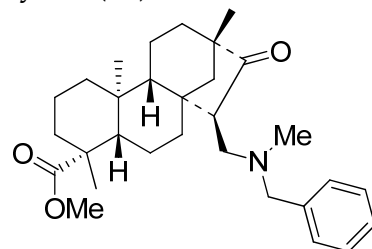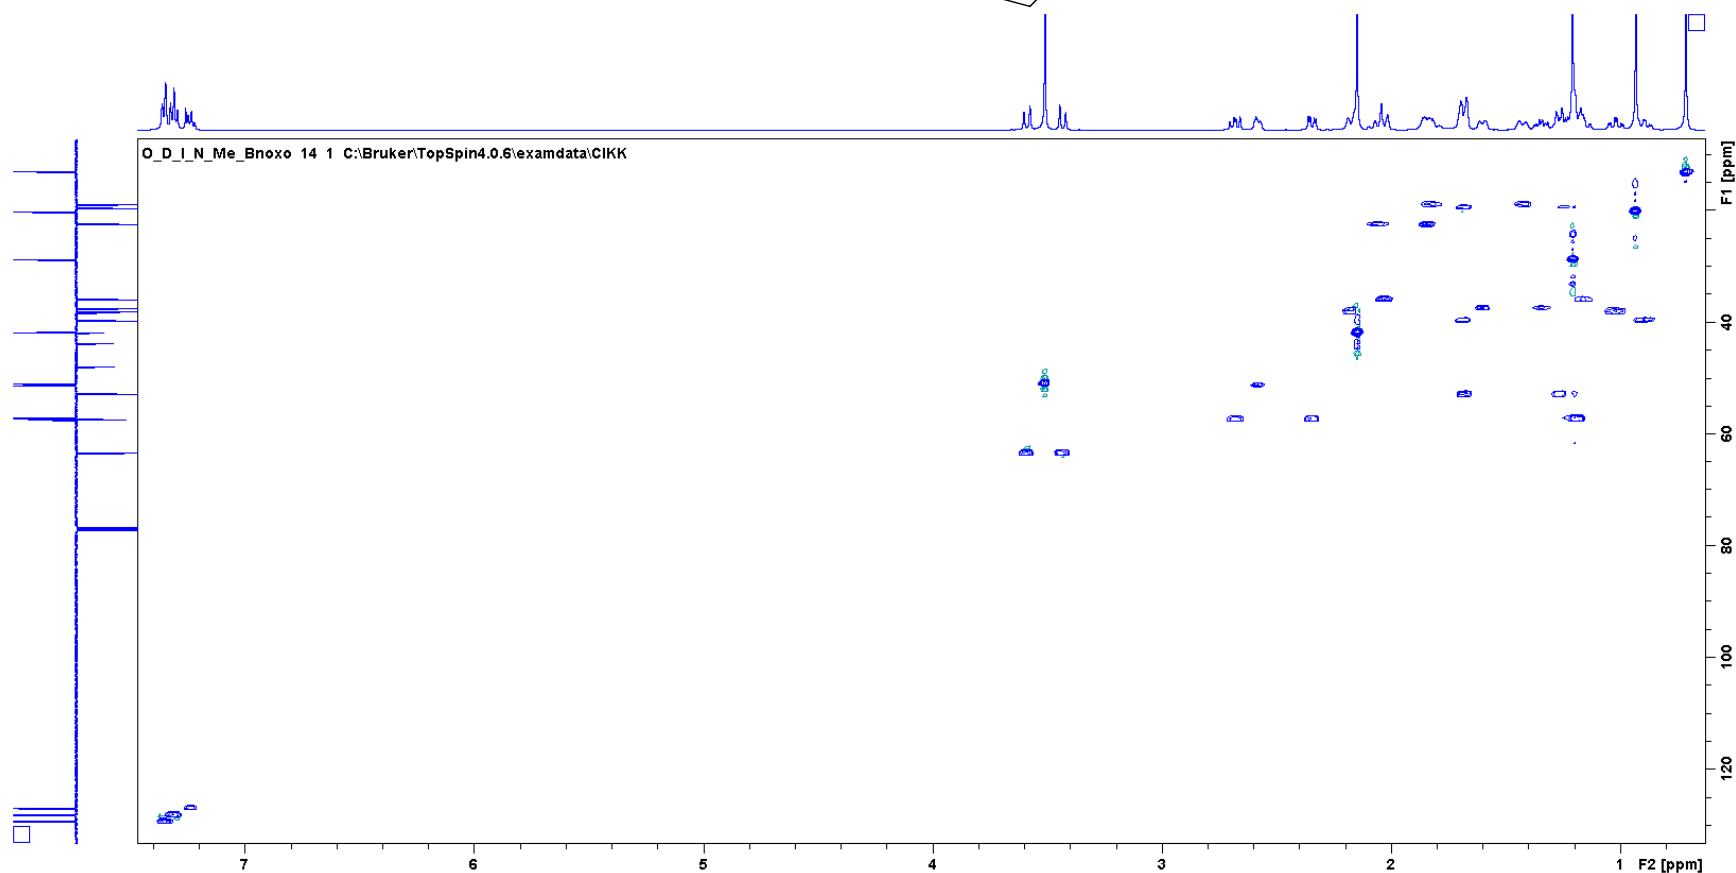

HMBC of compound (4*R*,6*aS*,9*S*,11*bS*)-Methyl 7-((benzyl(methyl)amino)methyl)-4,9,11*b*-trimethyl-8-oxotetradecahydro-6*a*,9-methanocyclohepta[*a*]naphthalene-4-carboxylate (**15**)



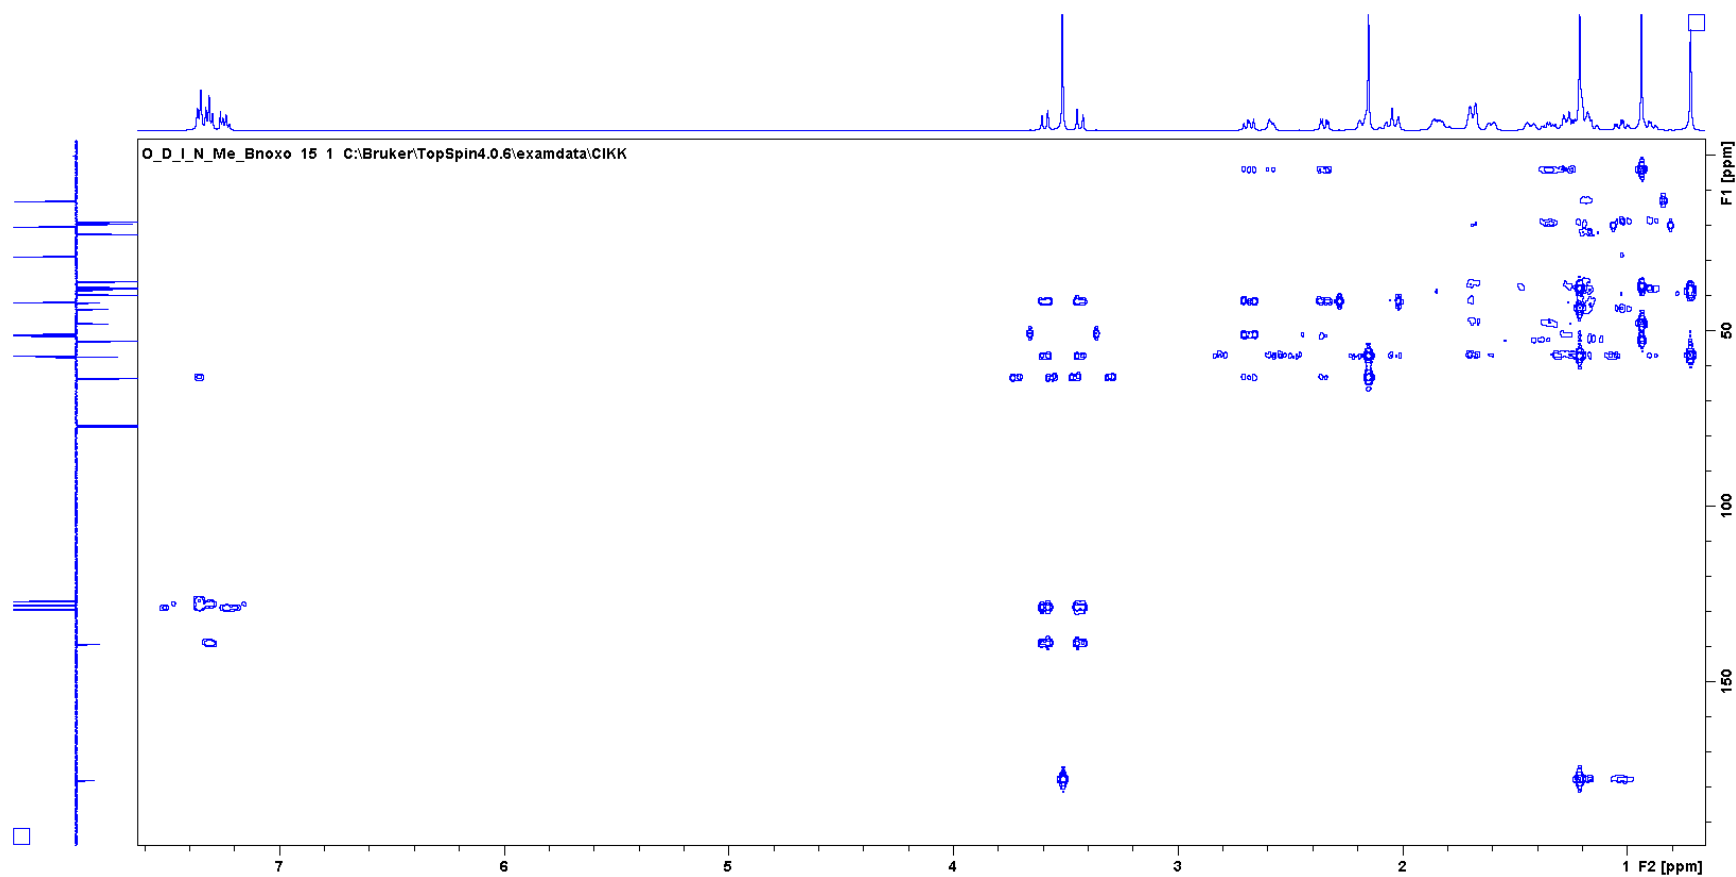

$^1\text{H}$ -NMR of compound (4*R*,6*aS*,9*S*,11*bS*)-Methyl 4,9,11*b*-trimethyl-8-oxo-7-(pyrrolidin-1-ylmethyl)tetradecahydro-6*a*,9-methanocyclohepta[*a*]naphthalene-4-carboxylate (**16**)

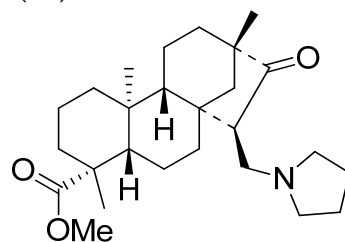

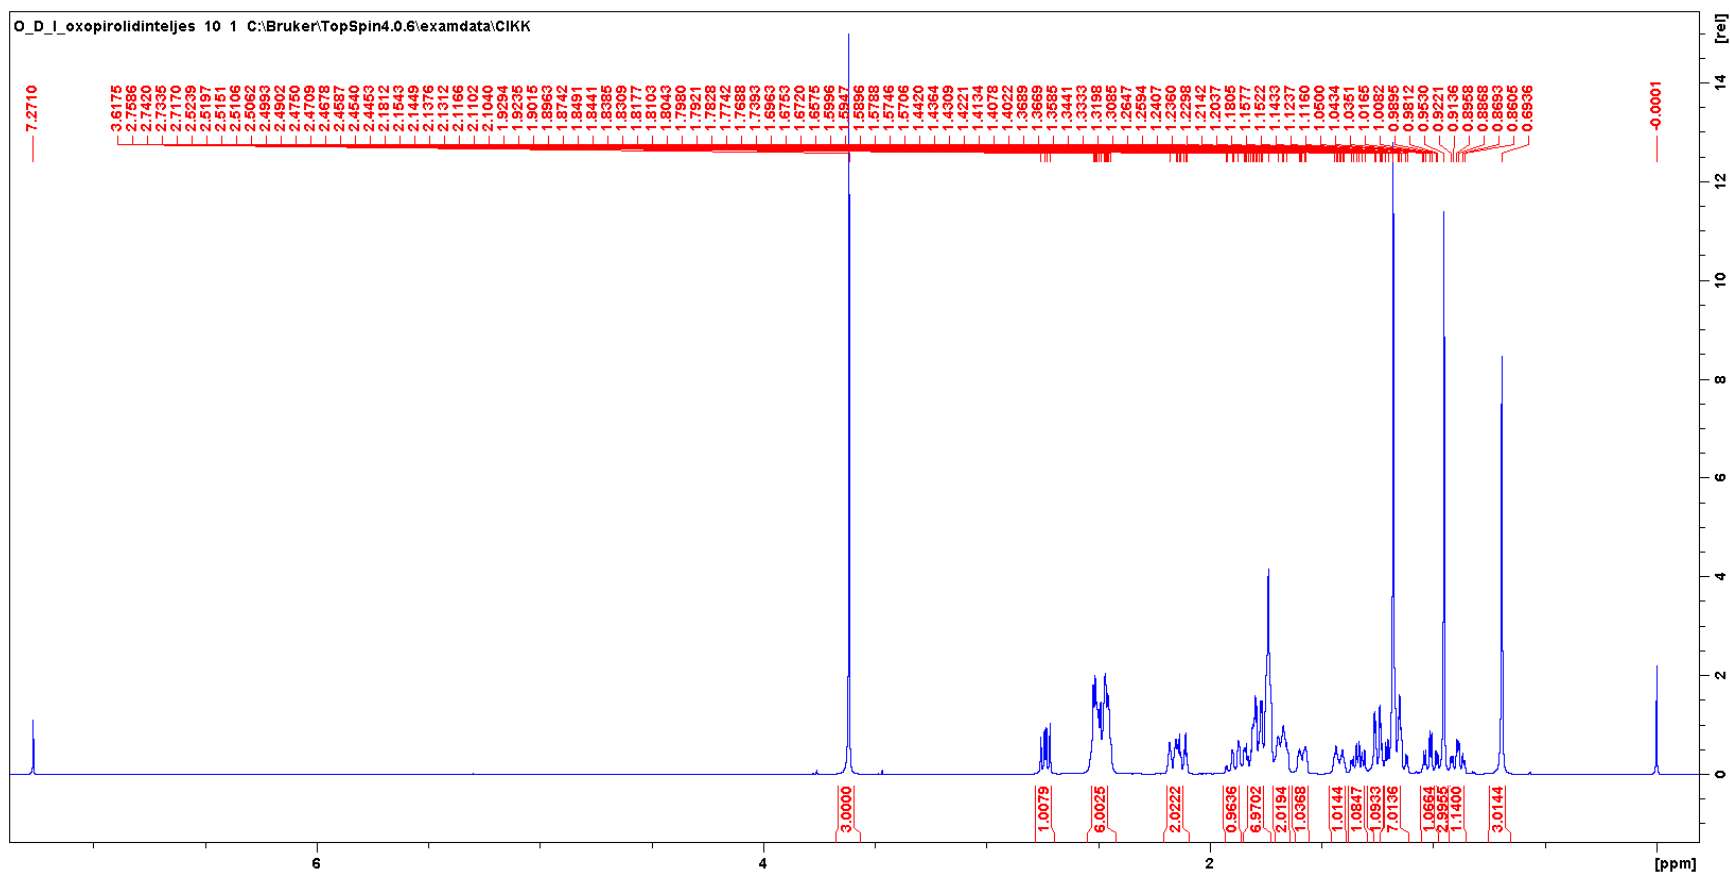

$^{13}\text{C}$ -NMR of compound (4*R*,6*aS*,9*S*,11*bS*)-Methyl 4,9,11*b*-trimethyl-8-oxo-7-(pyrrolidin-1-ylmethyl)tetradecahydro-6*a*,9-methanocyclohepta[*a*]naphthalene-4-carboxylate (**16**)

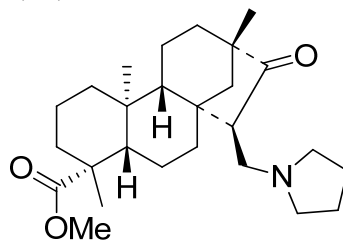



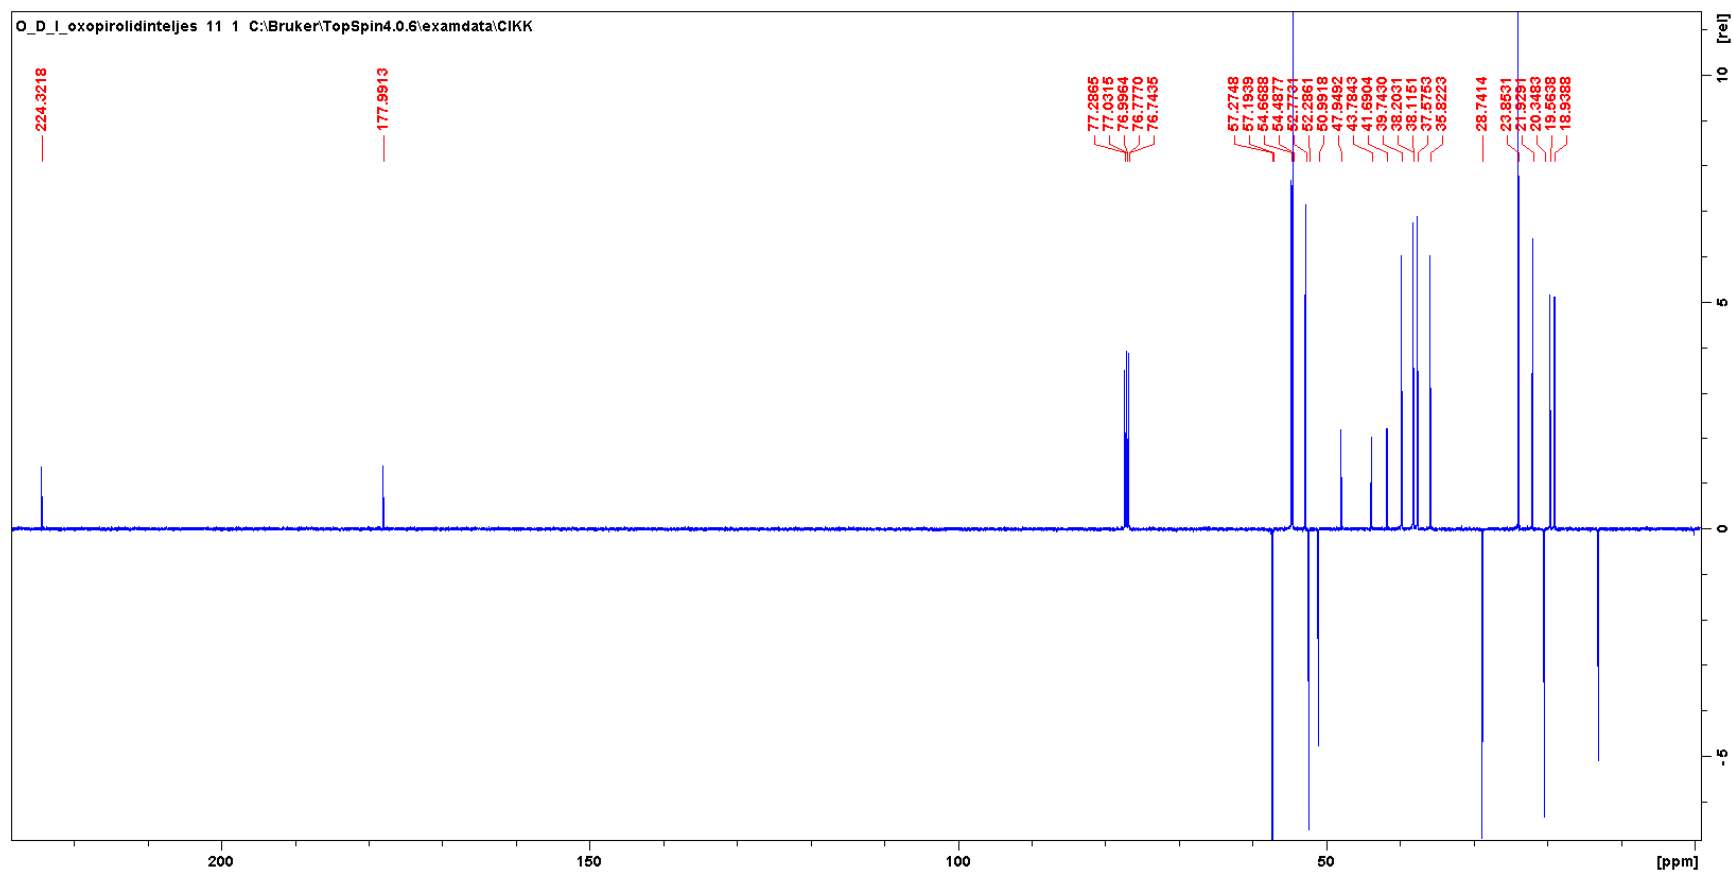

COSY of compound (4*R*,6*aS*,9*S*,11*bS*)-Methyl 4,9,11*b*-trimethyl-8-oxo-7-(pyrrolidin-1-ylmethyl)tetradecahydro-6*a*,9-methanocyclohepta[*a*]naphthalene-4-carboxylate (**16**)



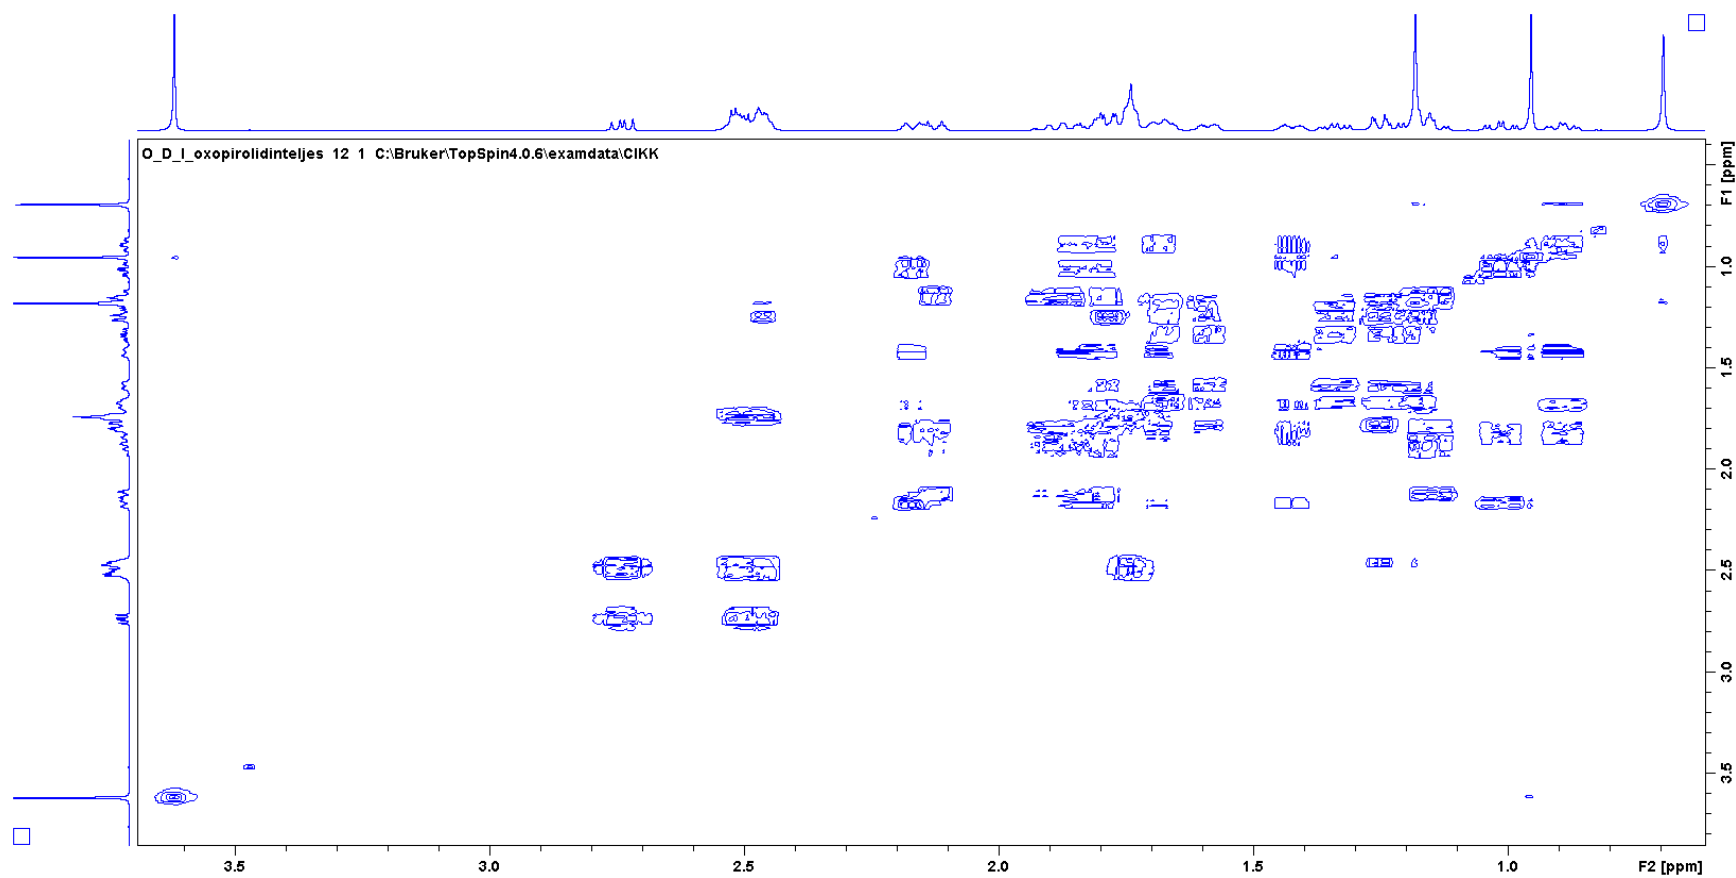

HSQC of compound (4*R*,6*aS*,9*S*,11*bS*)-Methyl 4,9,11*b*-trimethyl-8-oxo-7-(pyrrolidin-1-ylmethyl)tetradecahydro-6*a*,9-methanocyclohepta[*a*]naphthalene-4-carboxylate (**16**)

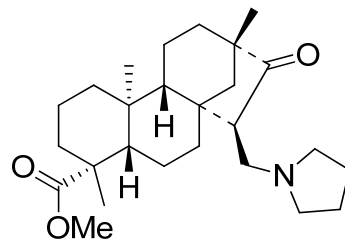

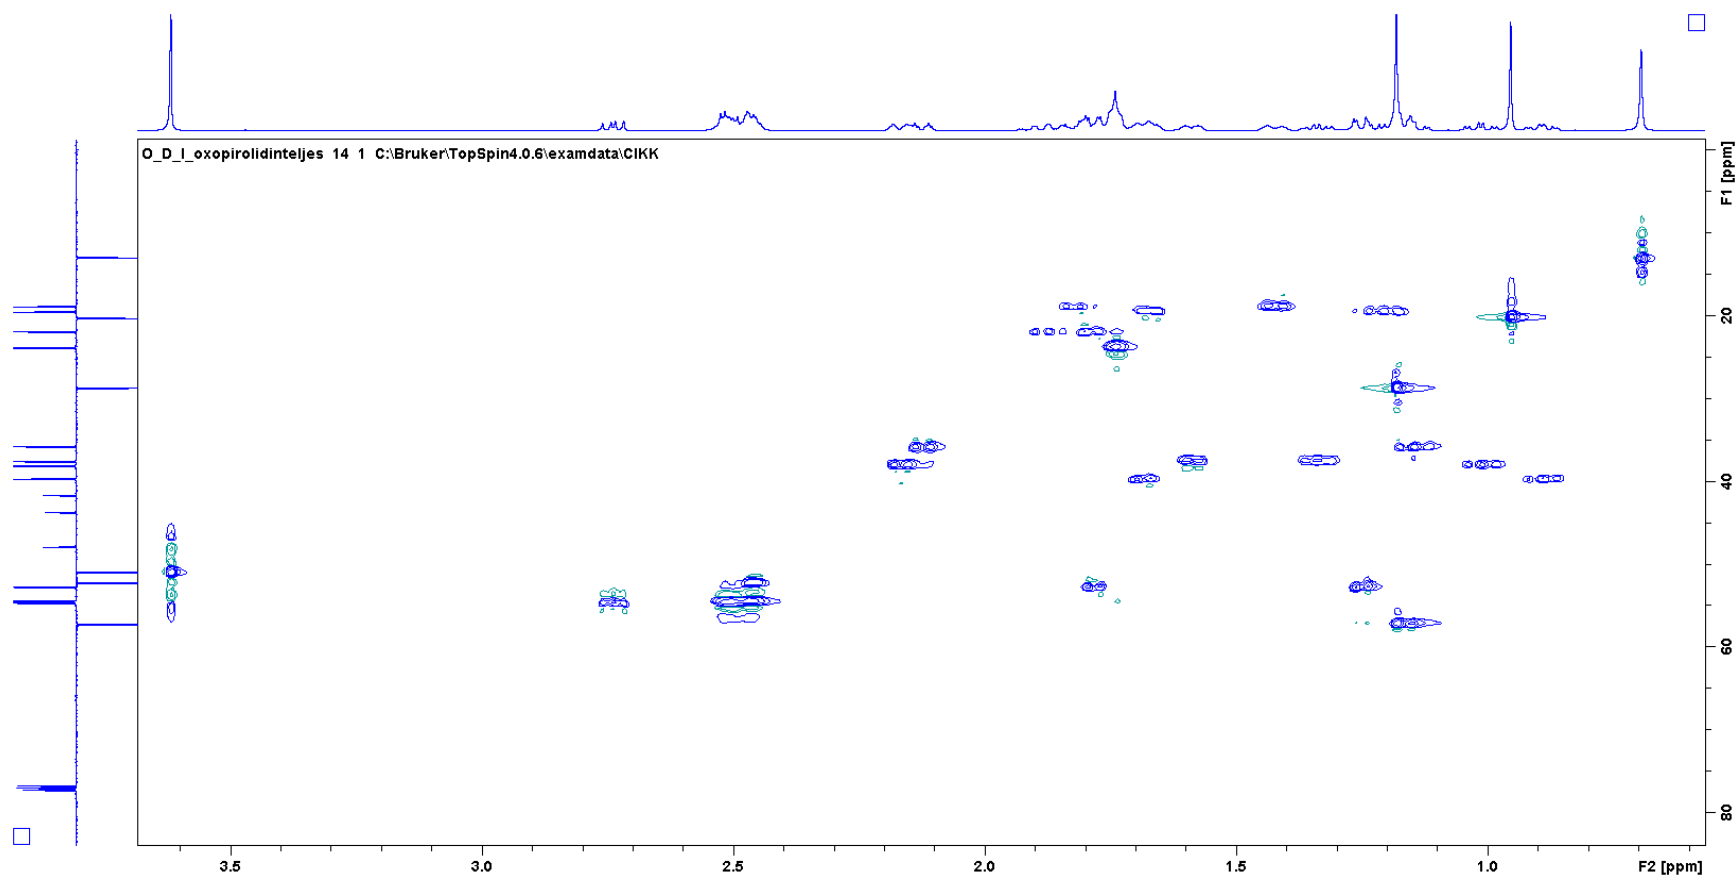

HMBC of compound (4*R*,6*aS*,9*S*,11*bS*)-Methyl 4,9,11*b*-trimethyl-8-oxo-7-(pyrrolidin-1-ylmethyl)tetradecahydro-6*a*,9-methanocyclohepta[*a*]naphthalene-4-carboxylate (**16**)

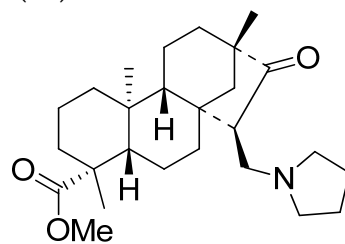

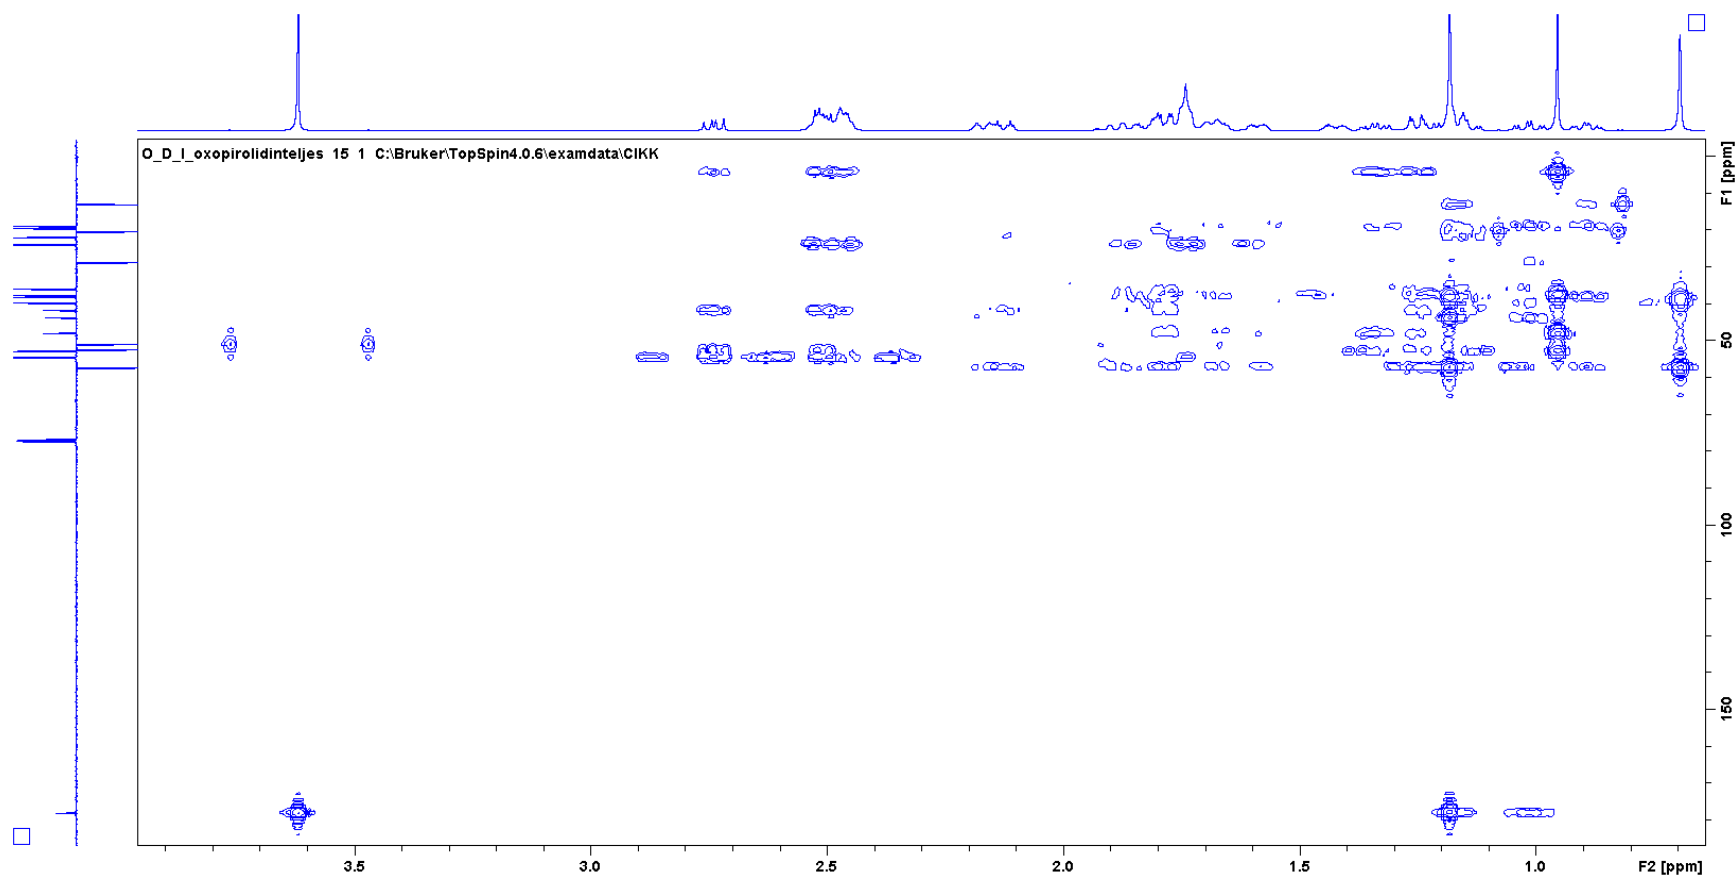

$^1\text{H}$ -NMR of compound (4*R*,6*aS*,9*S*,11*bS*)-Methyl 7-((dimethylamino)methyl)-4,9,11*b*-trimethyl-8-oxotetradecahydro-6*a*,9-methanocyclohepta[*a*]naphthalene-4-carboxylate (**17**)

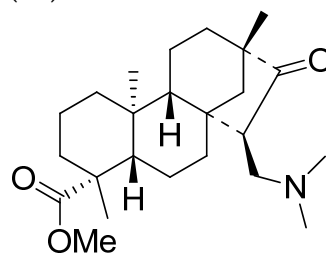

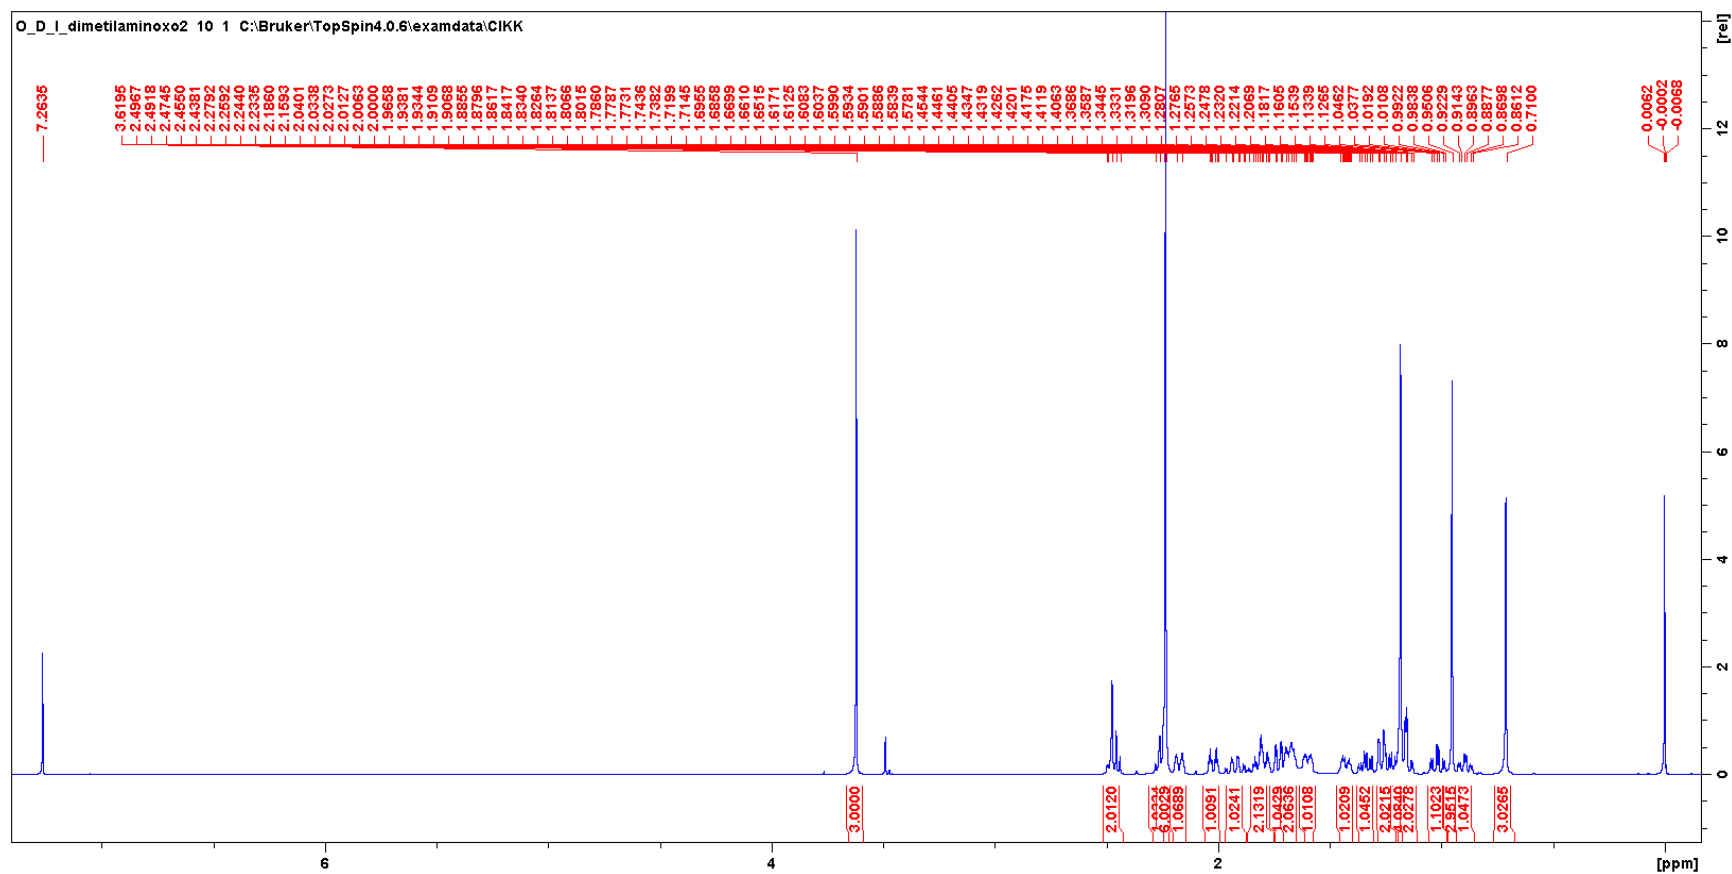

$^{13}\text{C}$ -NMR of compound (4*R*,6*S*,9*S*,11*bS*)-Methyl 7-((dimethylamino)methyl)-4,9,11*b*-trimethyl-8-oxotetradecahydro-6*a*,9-methanocyclohepta[*a*]naphthalene-4-carboxylate (**17**)



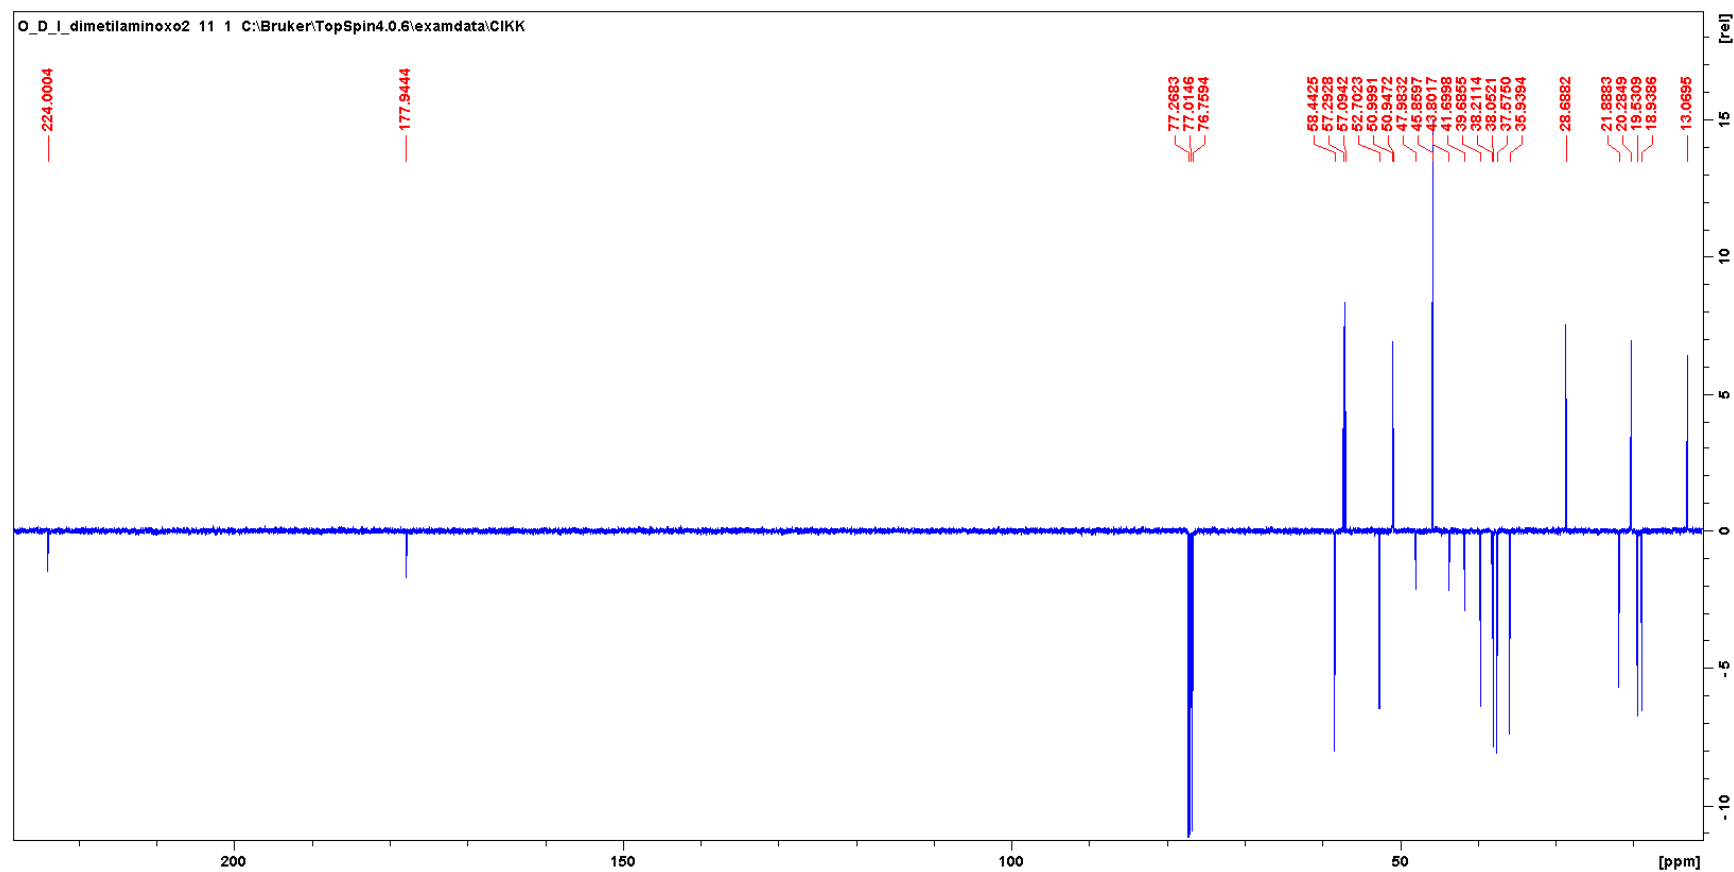

COSY of compound (4*R*,6*aS*,9*S*,11*bS*)-Methyl 7-((dimethylamino)methyl)-4,9,11*b*-trimethyl-8-oxotetradecahydro-6*a*,9-methanocyclohepta[*a*]naphthalene-4-carboxylate (**17**)



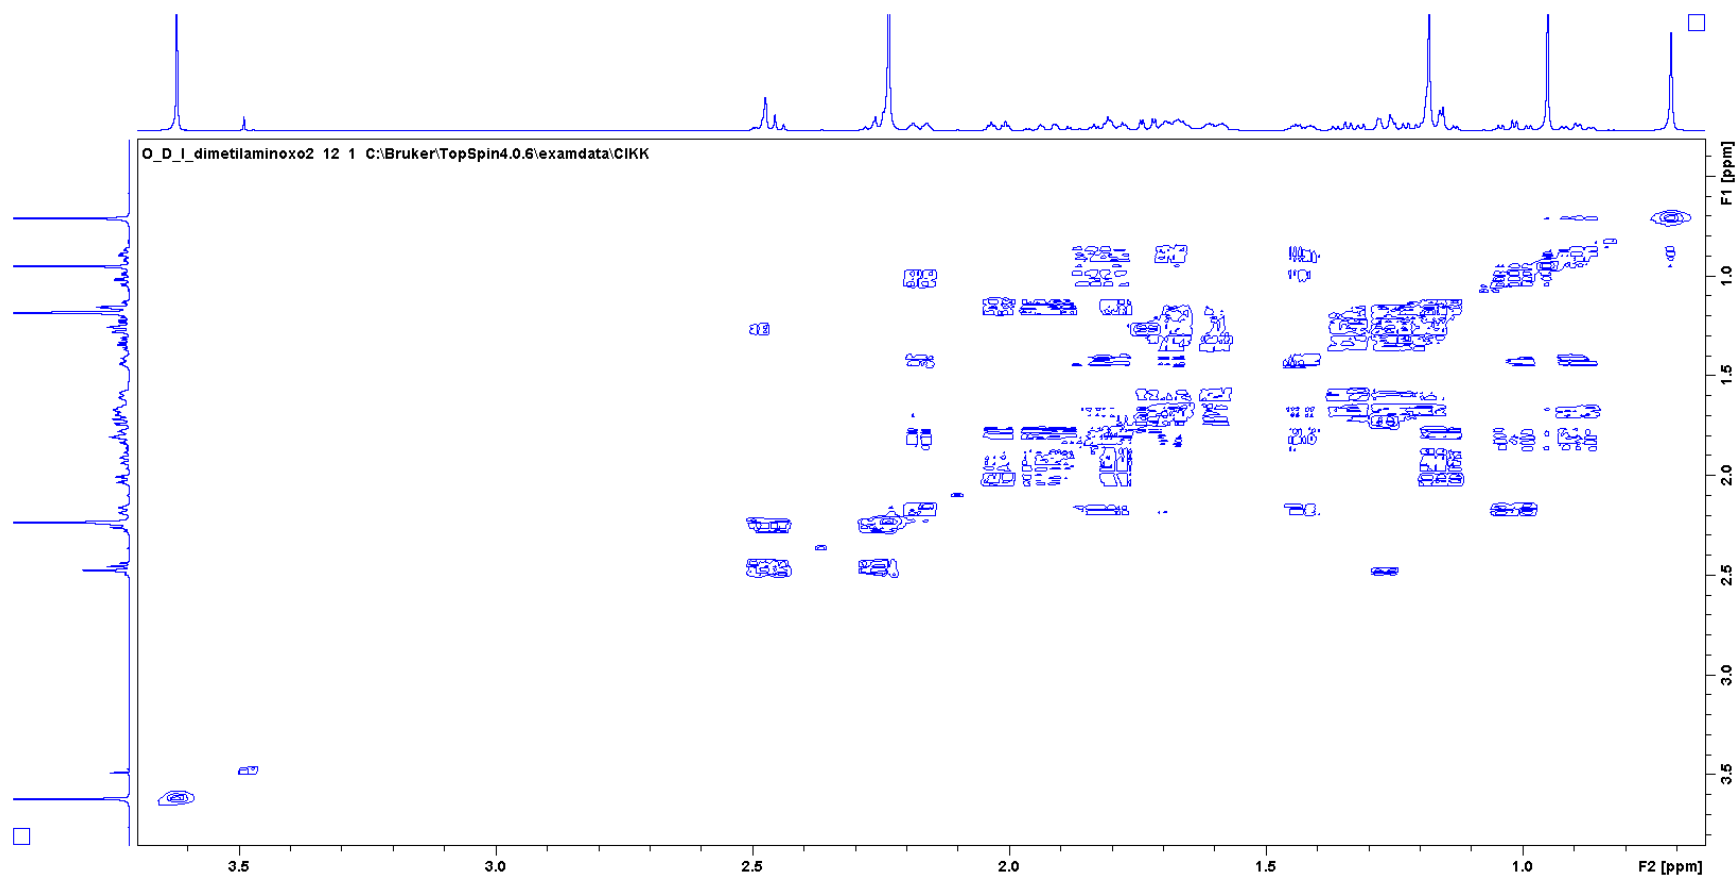

NOESY of compound (4*R*,6*aS*,9*S*,11*bS*)-Methyl 7-((dimethylamino)methyl)-4,9,11*b*-trimethyl-8-oxotetradecahydro-6*a*,9-methanocyclohepta[*a*]naphthalene-4-carboxylate (**17**)



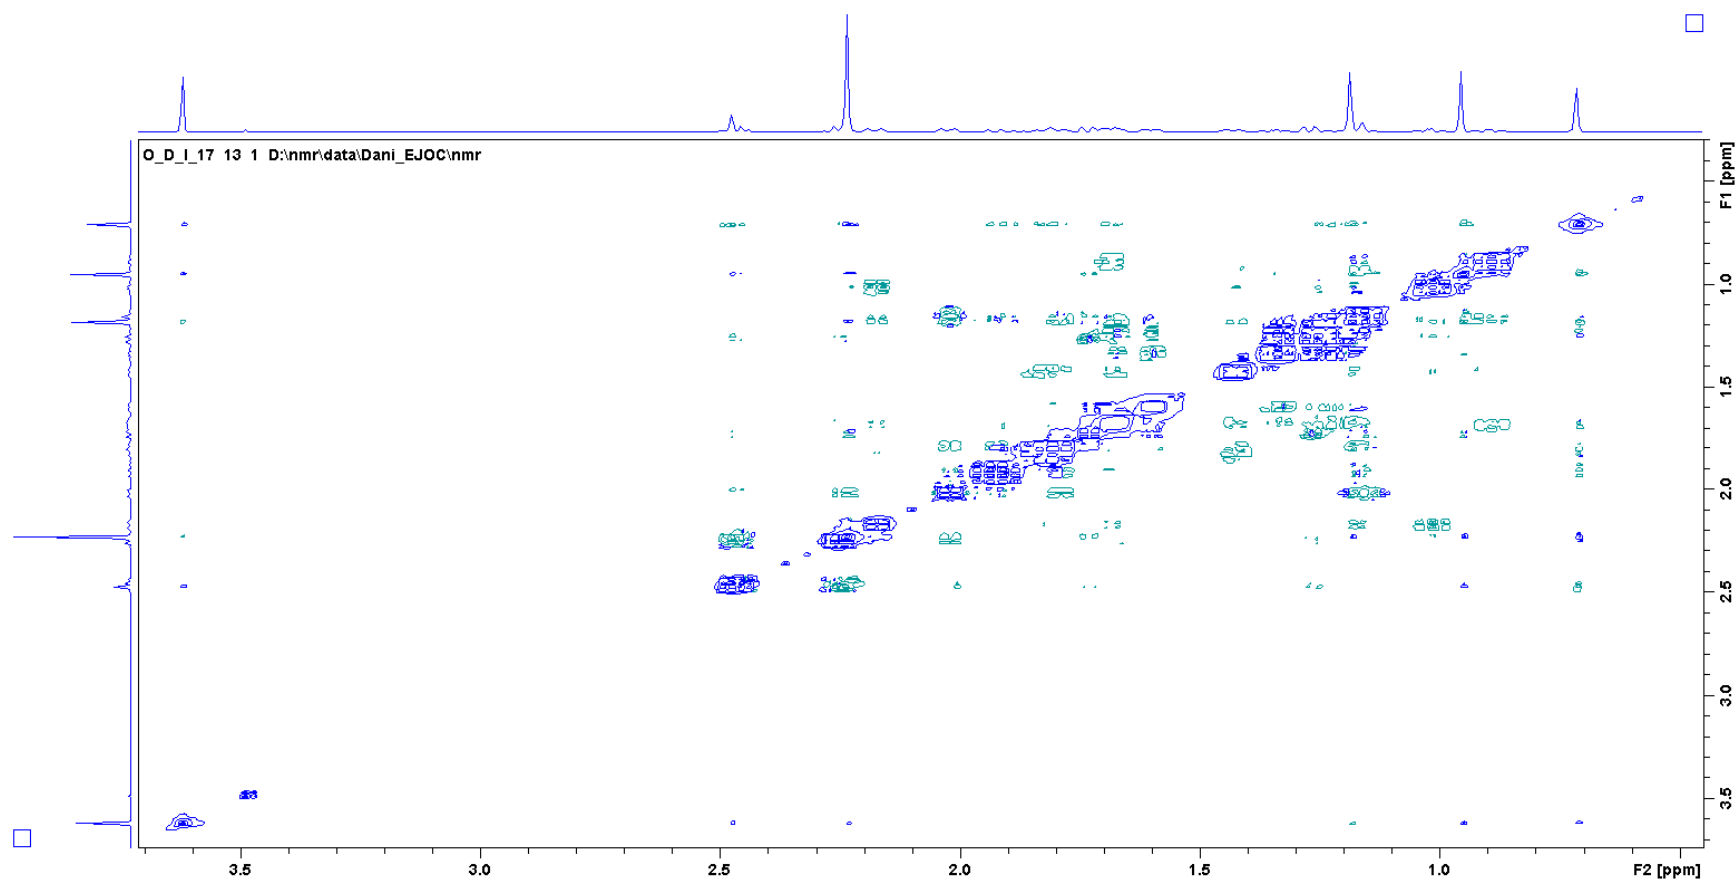

HSQC of compound (4*R*,6*aS*,9*S*,11*bS*)-Methyl 7-((dimethylamino)methyl)-4,9,11*b*-trimethyl-8-oxotetradecahydro-6*a*,9-methanocyclohepta[*a*]naphthalene-4-carboxylate (**17**)

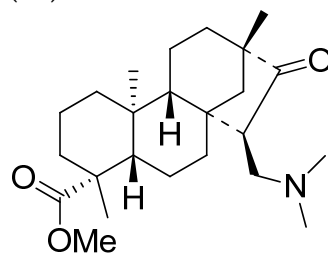



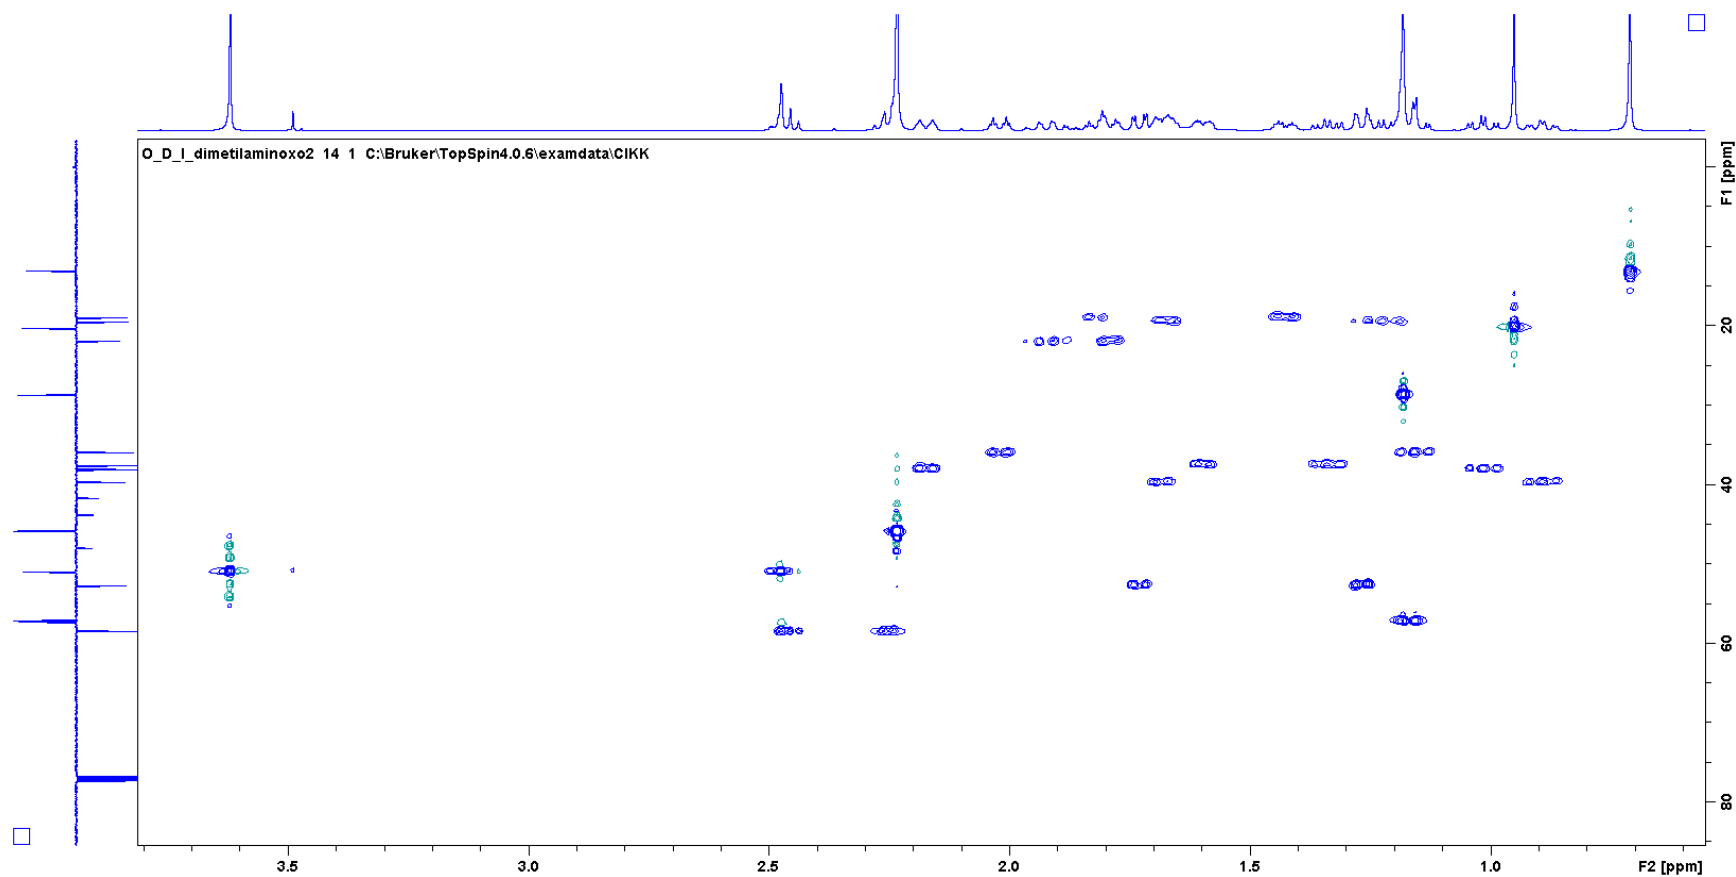

HMBC of compound (4*R*,6*aS*,9*S*,11*bS*)-Methyl 7-((dimethylamino)methyl)-4,9,11*b*-trimethyl-8-oxotetradecahydro-6*a*,9-methanocyclohepta[*a*]naphthalene-4-carboxylate (**17**)



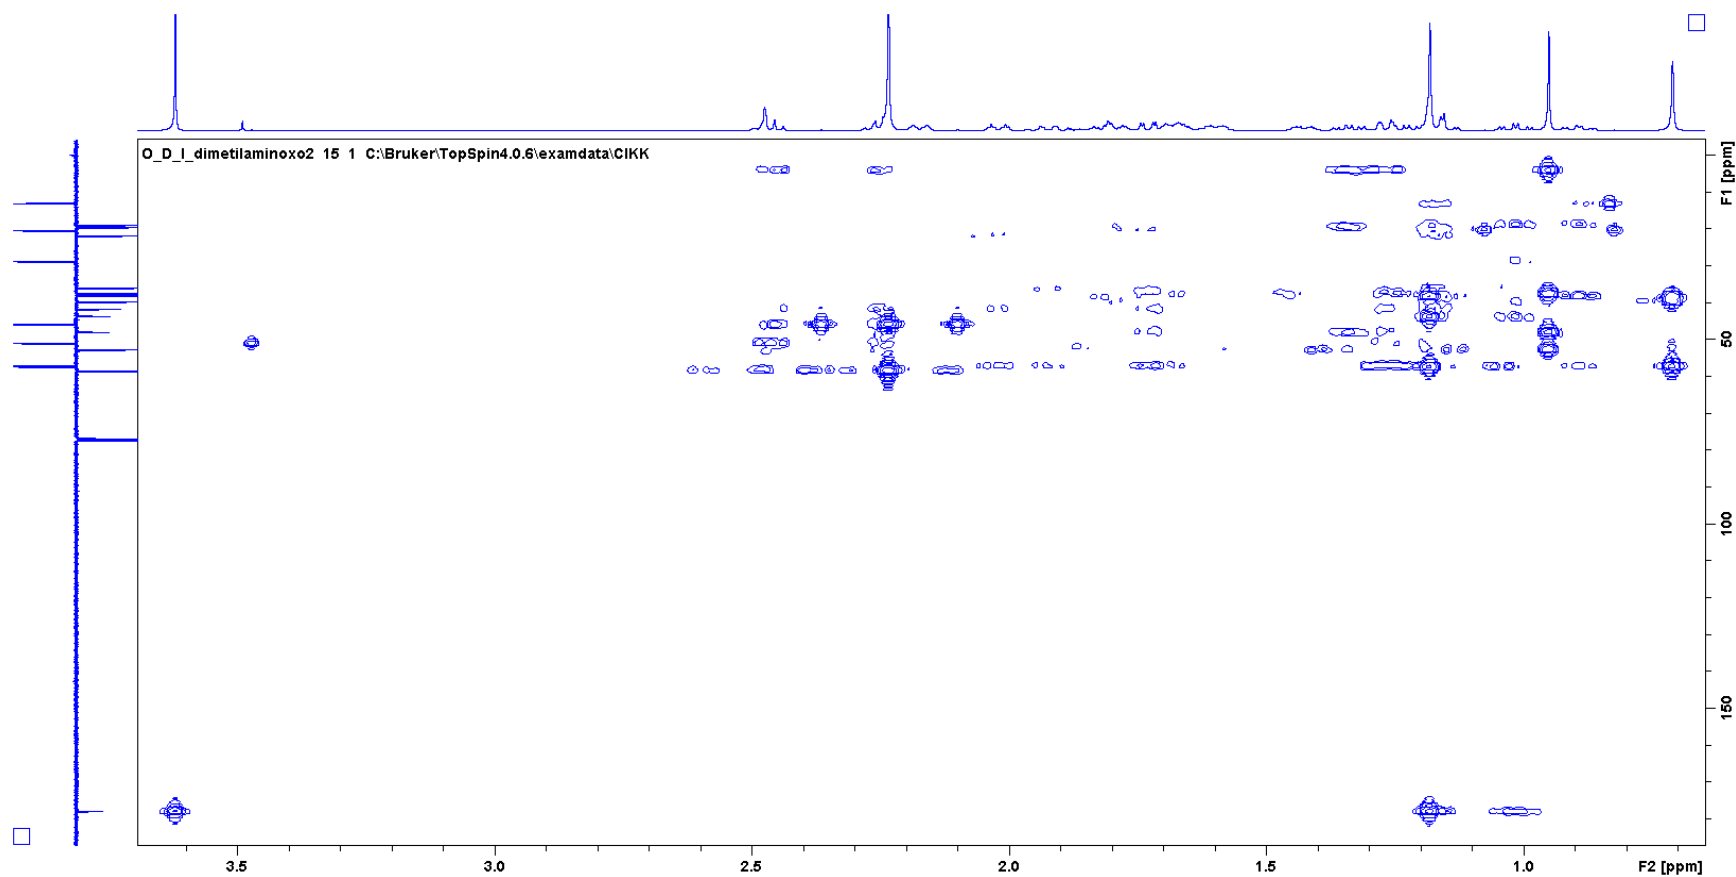

$^1\text{H}$ -NMR of compound (4*R*,6*aS*,9*S*,11*bS*)-Methyl 7-((diethylamino)methyl)-4,9,11*b*-trimethyl-8-oxotetradecahydro-6*a*,9-methanocyclohepta[*a*]naphthalene-4-carboxylate (**18**)

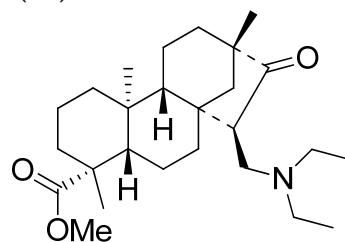

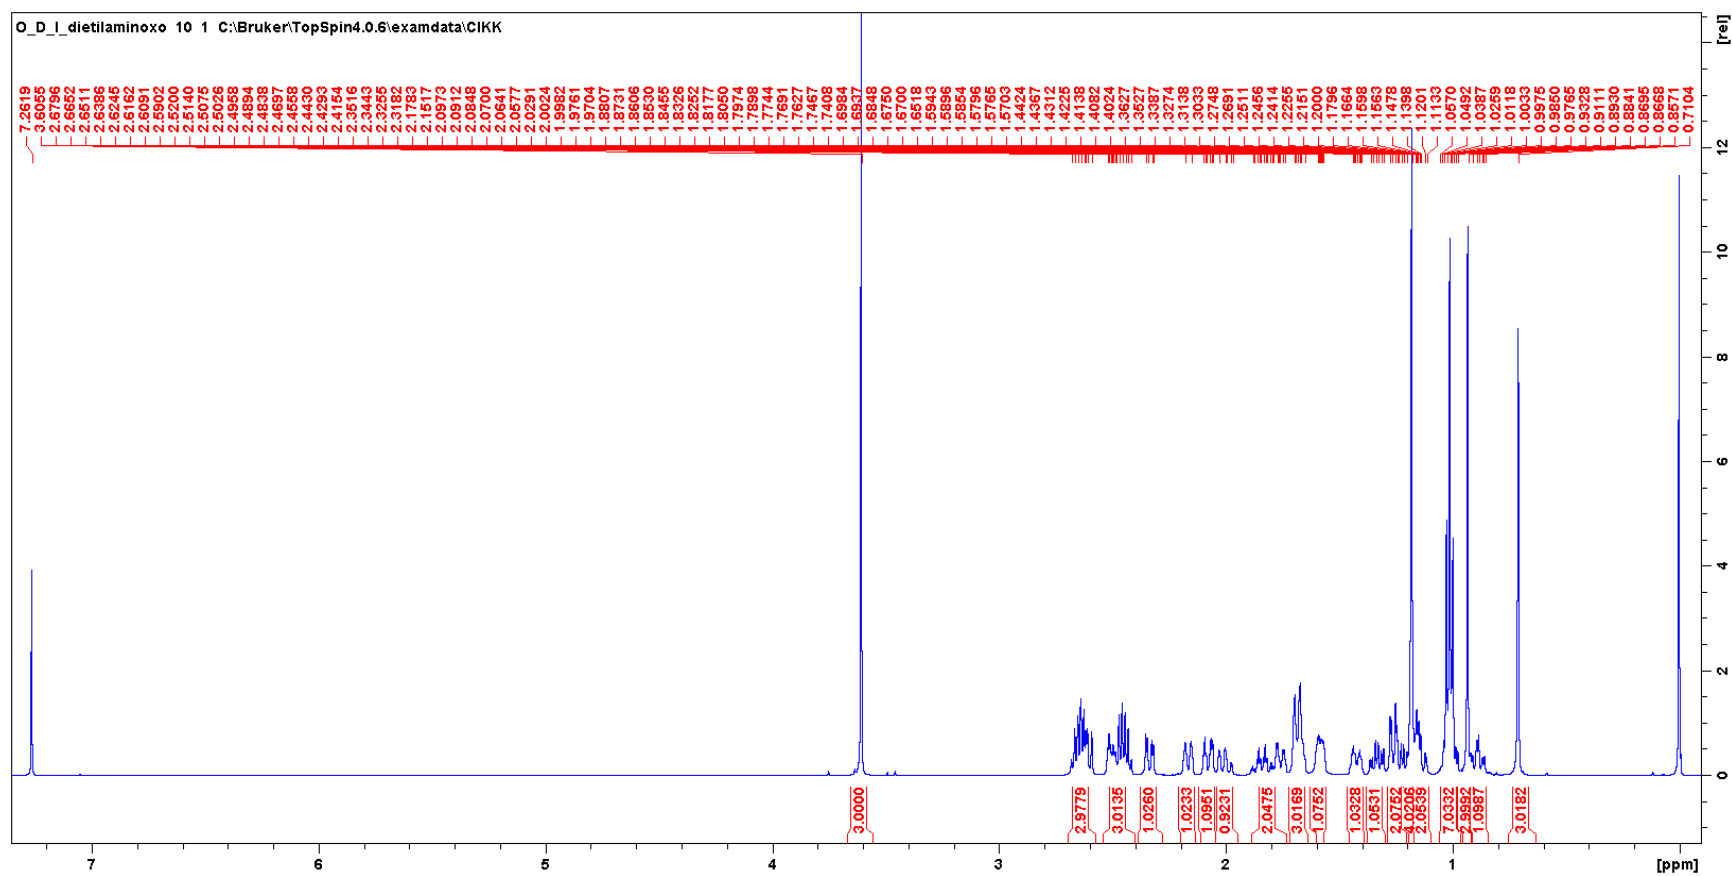

$^{13}\text{C}$ -NMR of compound (4*R*,6*aS*,9*S*,11*bS*)-Methyl 7-((diethylamino)methyl)-4,9,11*b*-trimethyl-8-oxotetradecahydro-6*a*,9-methanocyclohepta[*a*]naphthalene-4-carboxylate (**18**)

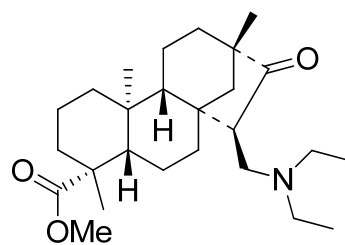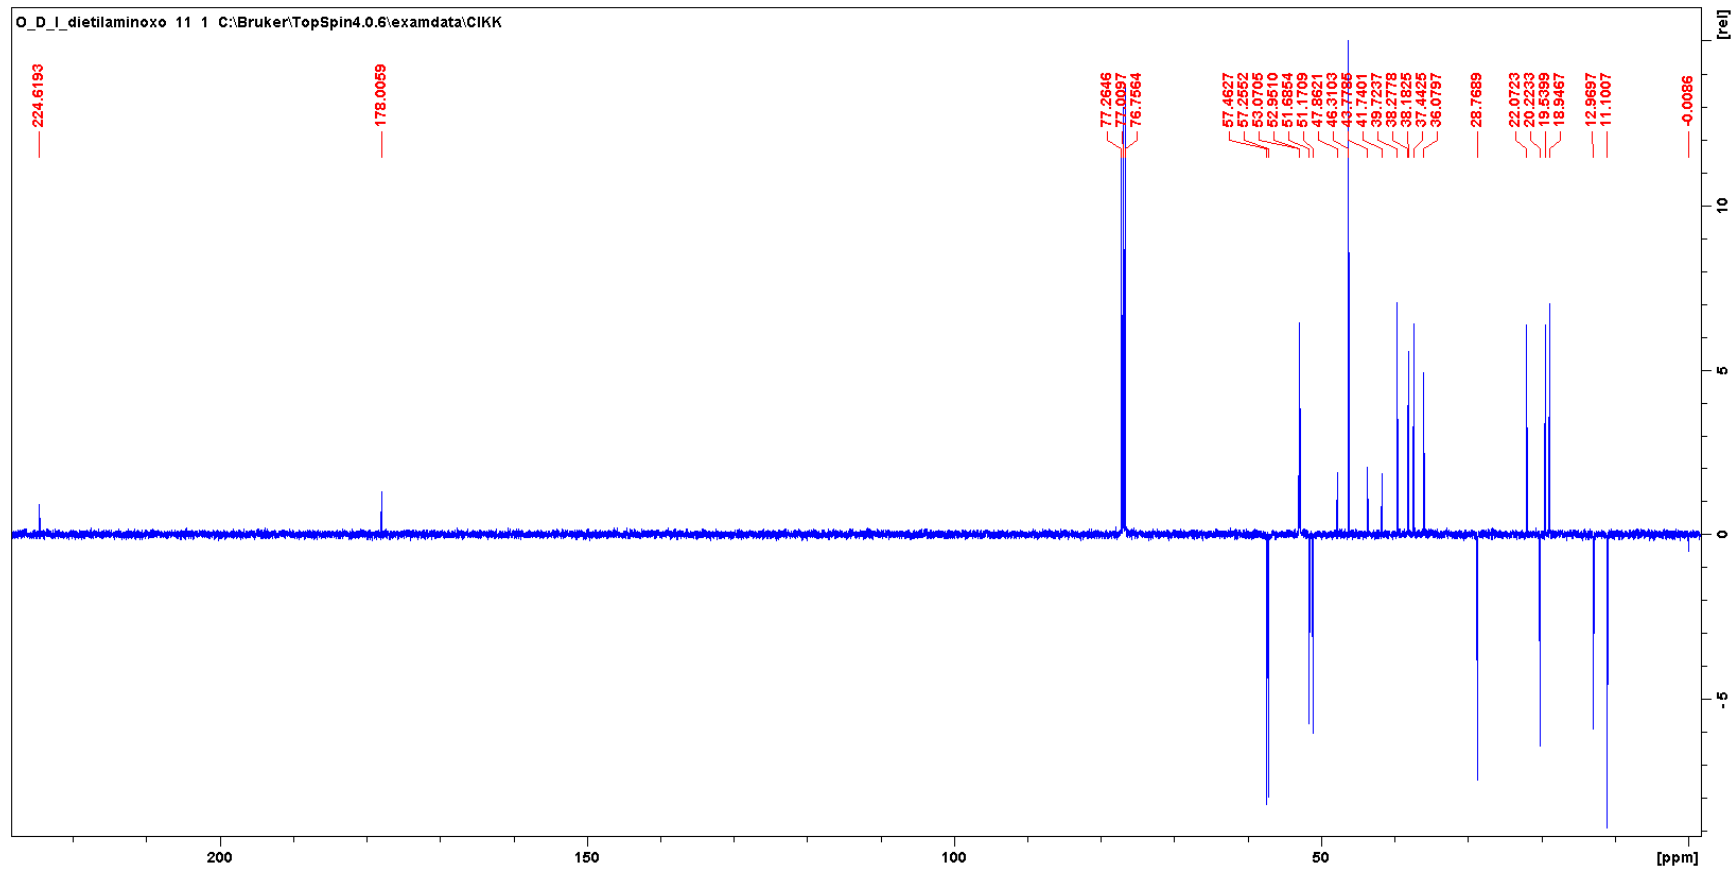

COSY of compound (4*R*,6*aS*,9*S*,11*bS*)-Methyl 7-((diethylamino)methyl)-4,9,11*b*-trimethyl-8-oxotetradecahydro-6*a*,9-methanocyclohepta[*a*]naphthalene-4-carboxylate (**18**)

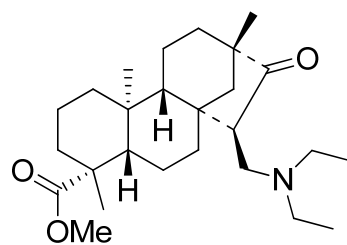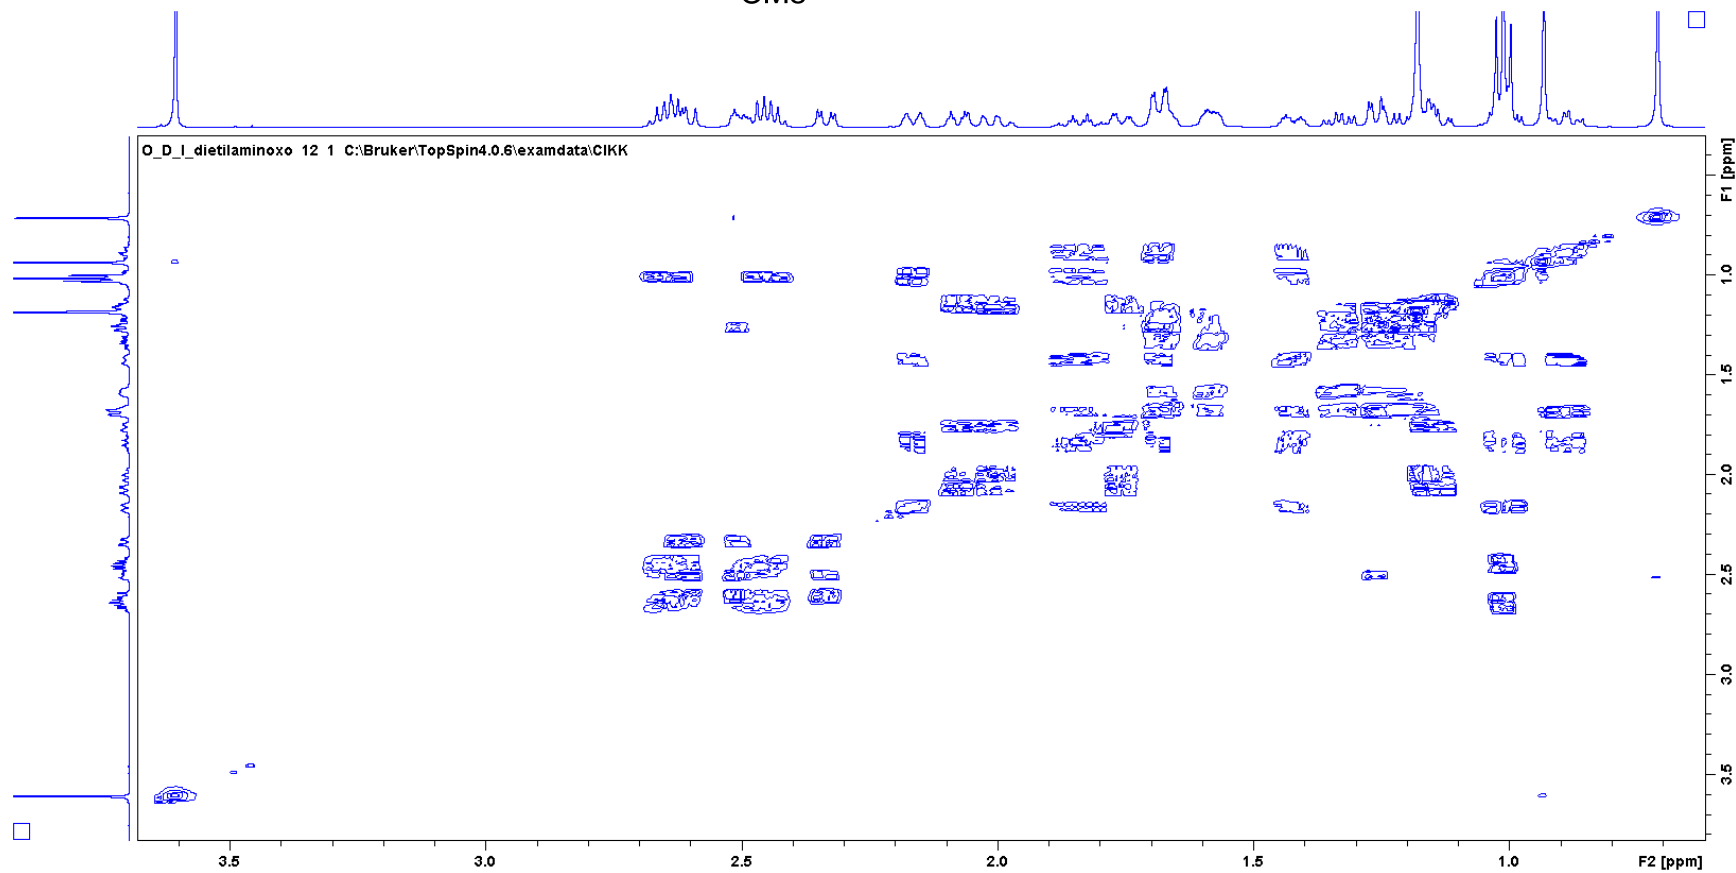

NOESY of compound (4*R*,6*aS*,9*S*,11*bS*)-Methyl 7-((diethylamino)methyl)-4,9,11*b*-trimethyl-8-oxotetradecahydro-6*a*,9-methanocyclohepta[*a*]naphthalene-4-carboxylate (**18**)

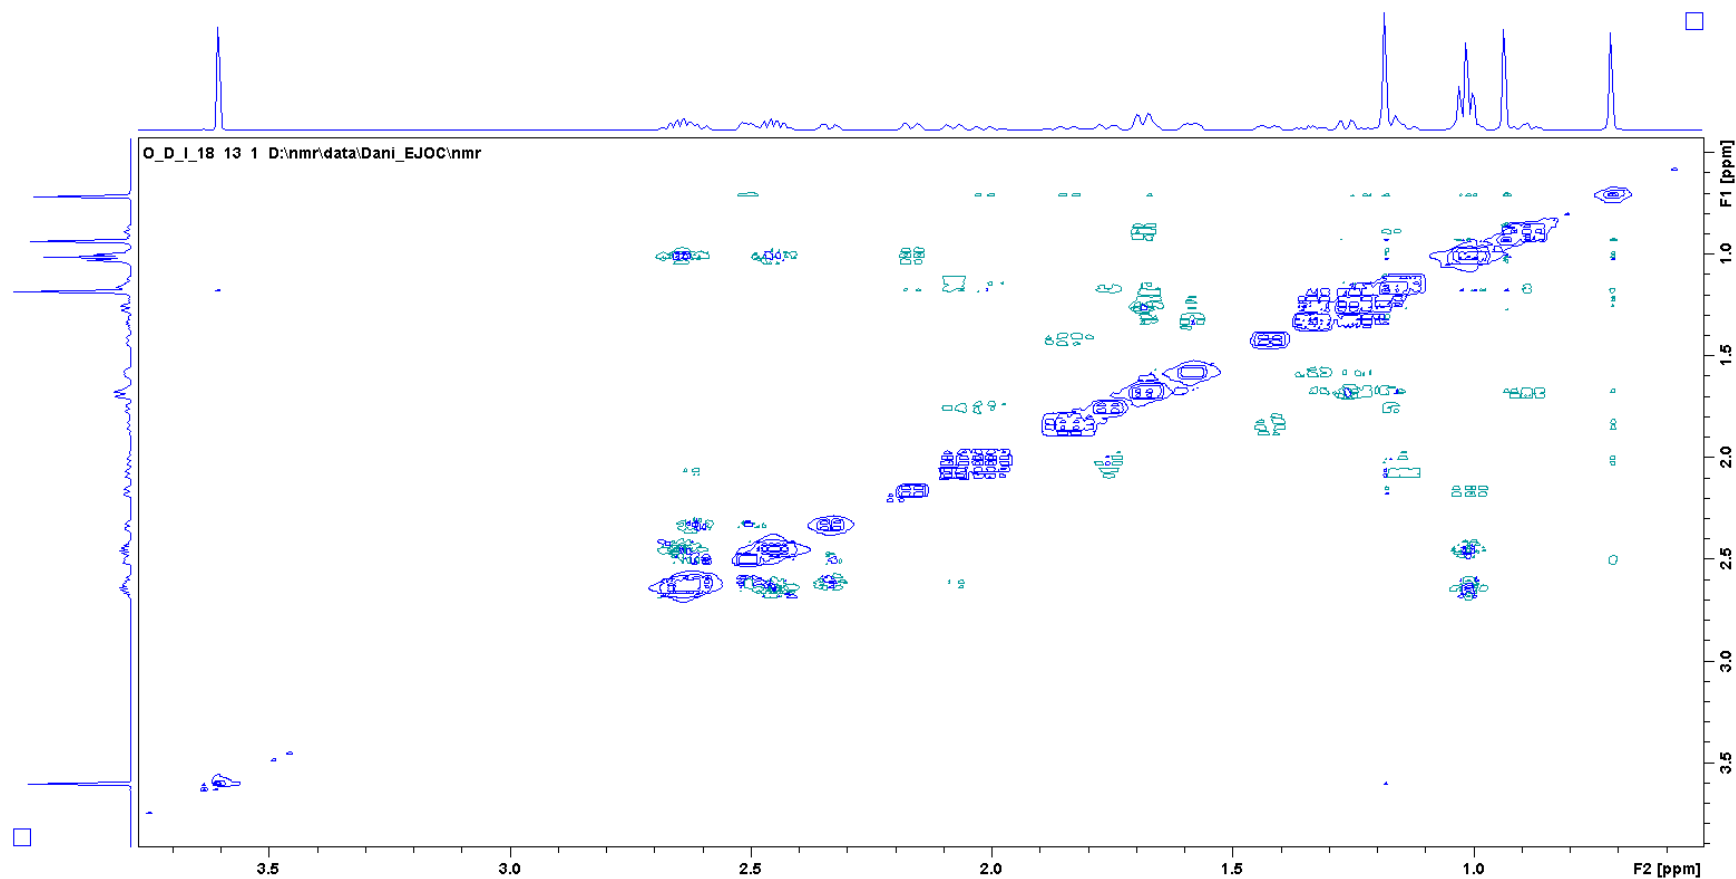

HSQC of compound (4*R*,6*aS*,9*S*,11*bS*)-Methyl 7-((diethylamino)methyl)-4,9,11*b*-trimethyl-8-oxotetradecahydro-6*a*,9-methanocyclohepta[*a*]naphthalene-4-carboxylate (**18**)

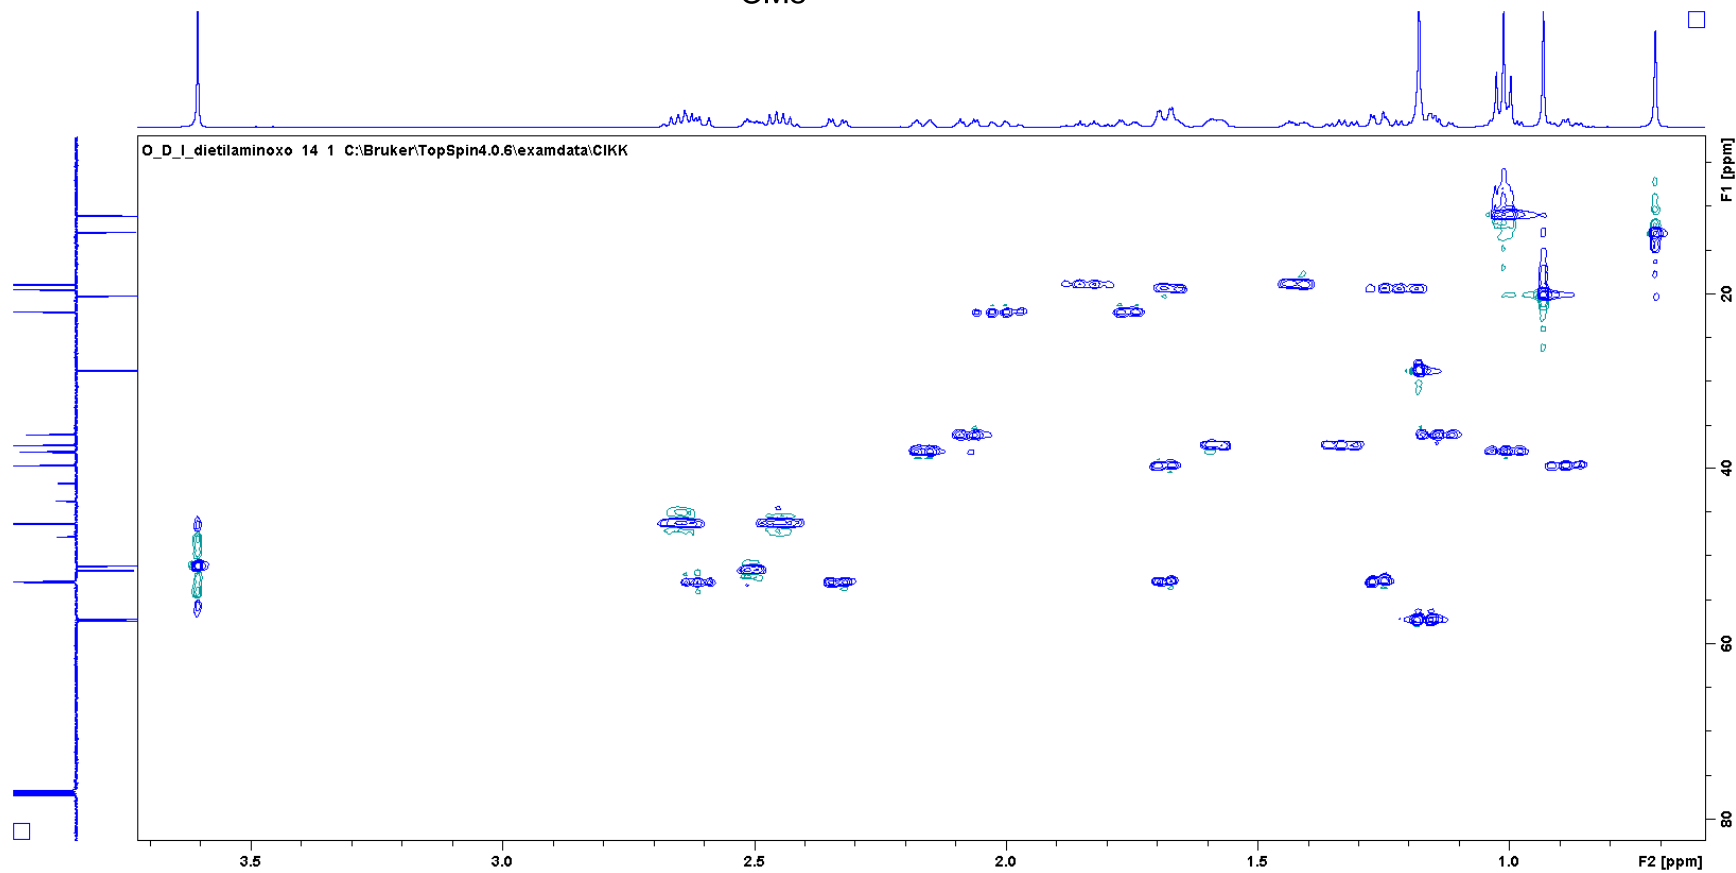

HMBC of compound (4*R*,6*aS*,9*S*,11*bS*)-Methyl 7-((diethylamino)methyl)-4,9,11*b*-trimethyl-8-oxotetradecahydro-6*a*,9-methanocyclohepta[*a*]naphthalene-4-carboxylate (**18**)

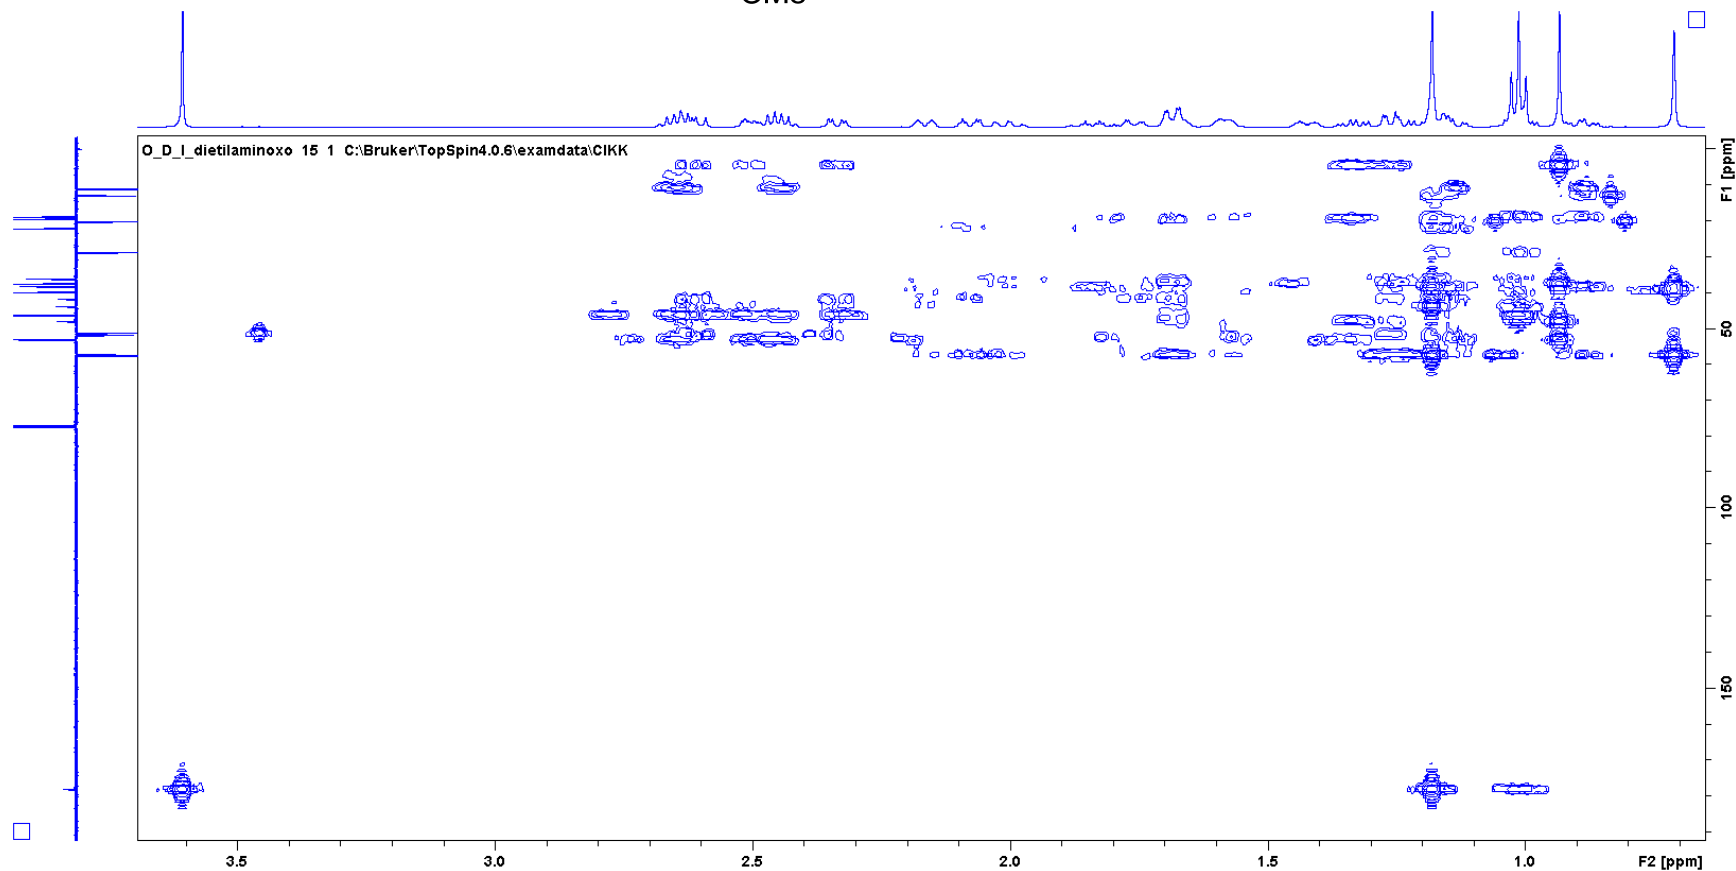

$^1\text{H}$ -NMR of compound (4*R*,6*aS*,9*S*,11*bS*)-Methyl 8-hydroxy-4,9,11*b*-trimethyl-7-(morpholinomethyl)tetradecahydro-6*a*,9-methanocyclohepta[*a*]naphthalene-4-carboxylate (**19a**)



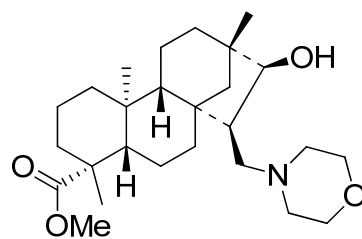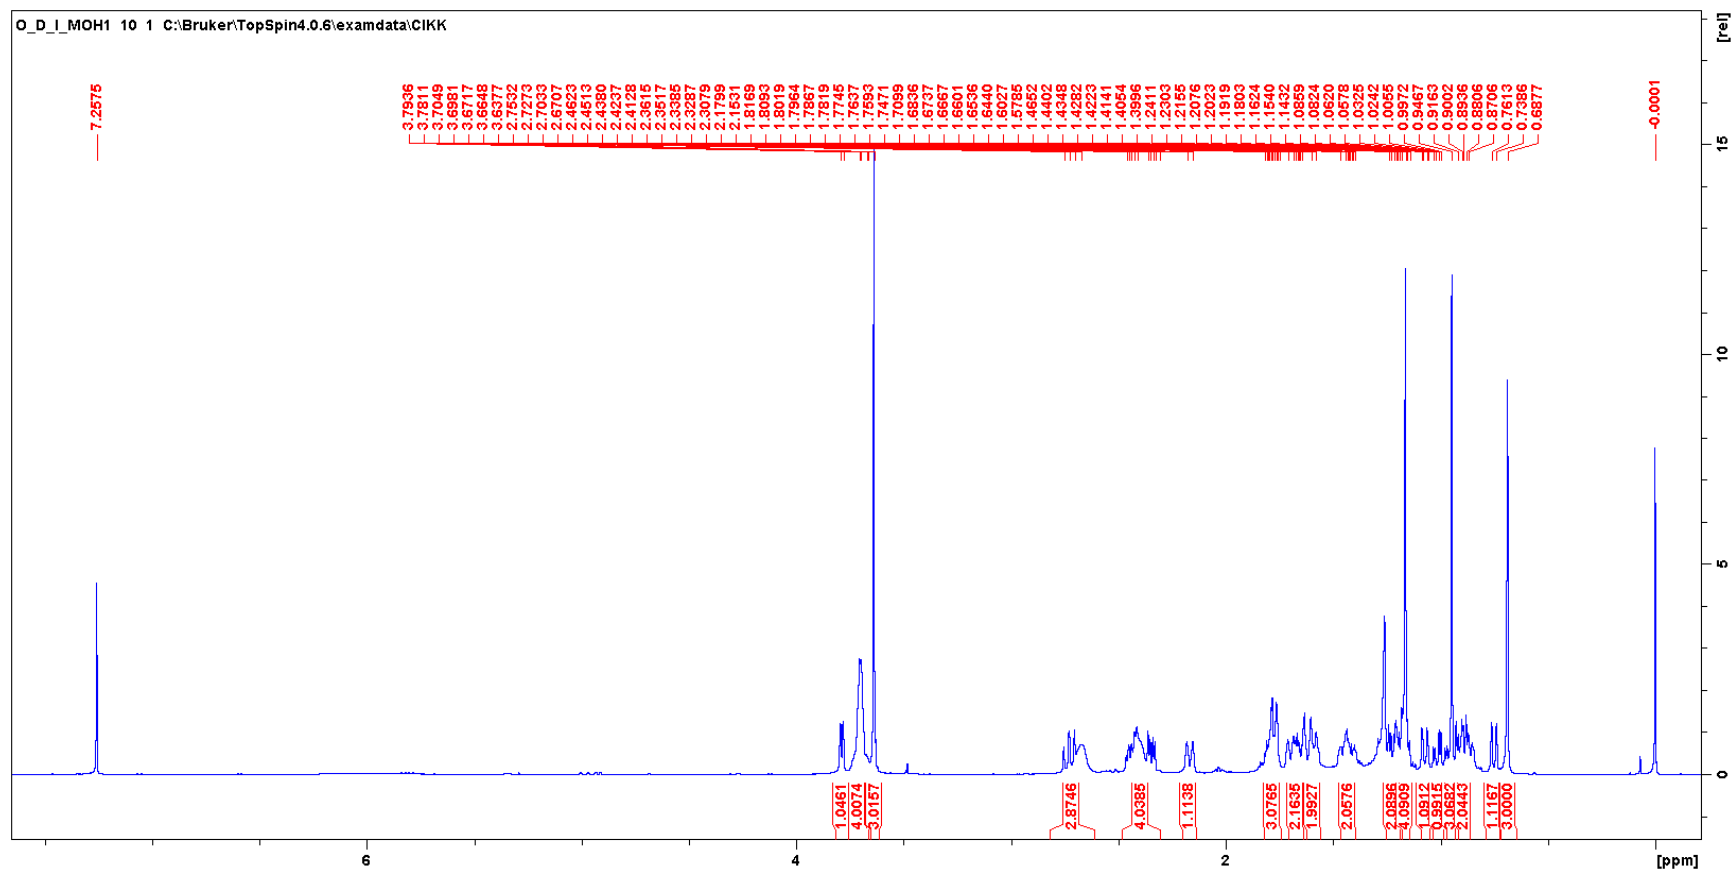

$^{13}\text{C}$ -NMR of compound (4*R*,6*aS*,9*S*,11*bS*)-Methyl 8-hydroxy-4,9,11*b*-trimethyl-7-(morpholinomethyl)tetradecahydro-6*a*,9-methanocyclohepta[*a*]naphthalene-4-carboxylate (**19a**)

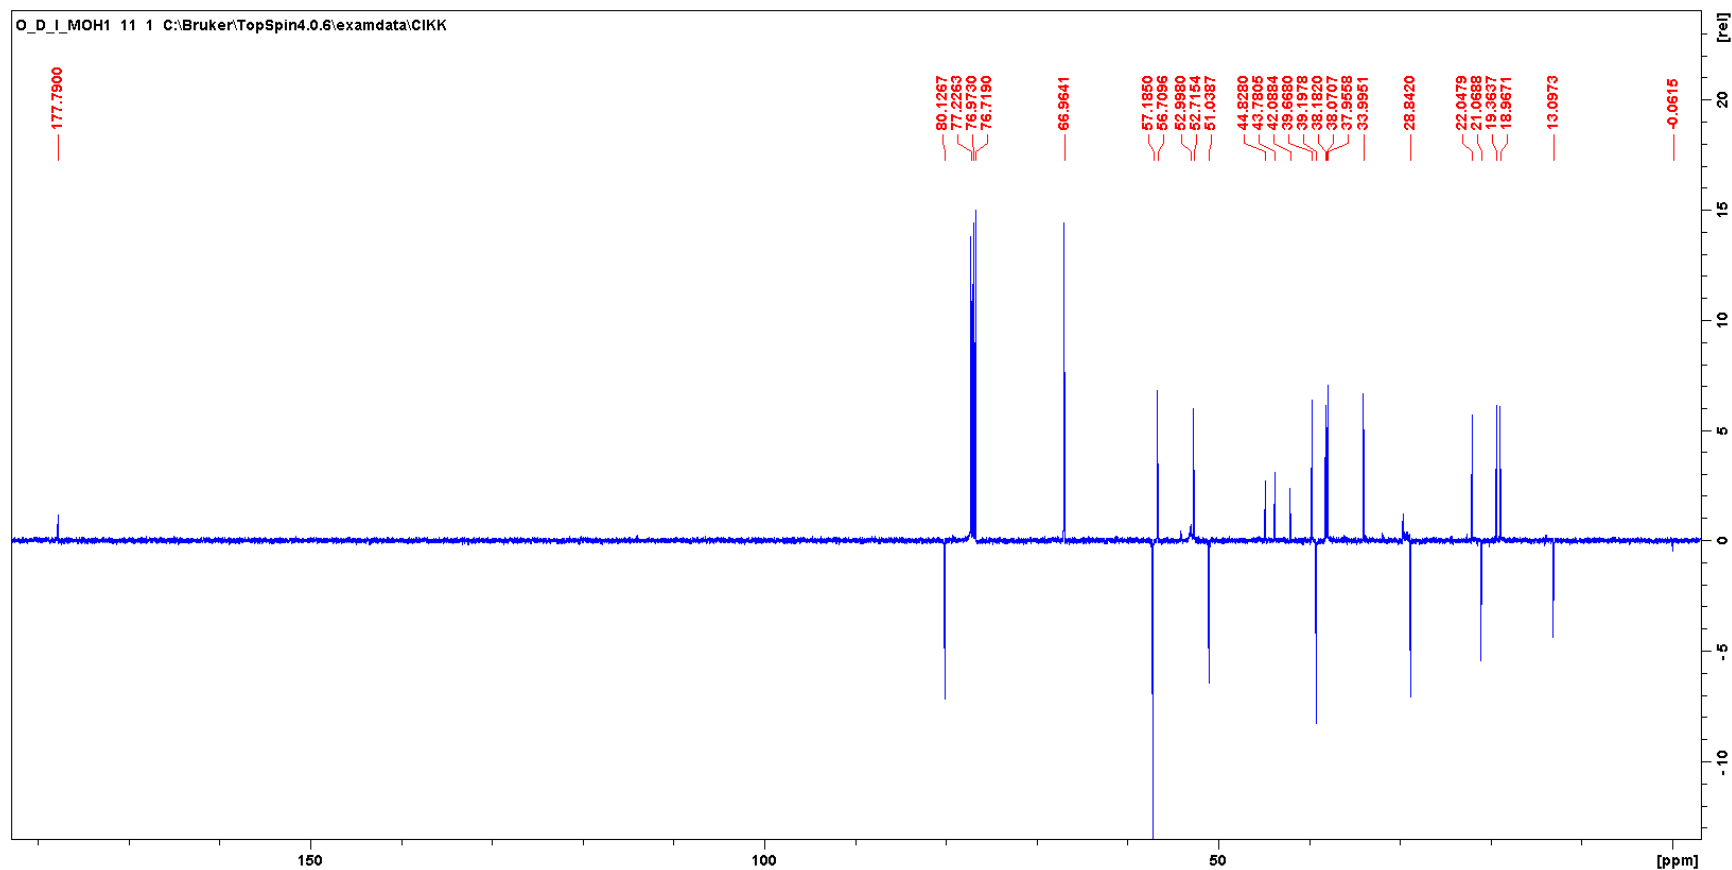

COSY of compound (4*R*,6*aS*,9*S*,11*bS*)-Methyl 8-hydroxy-4,9,11*b*-trimethyl-7-(morpholinomethyl)tetradecahydro-6*a*,9-methanocyclohepta[*a*]naphthalene-4-carboxylate (**19a**)

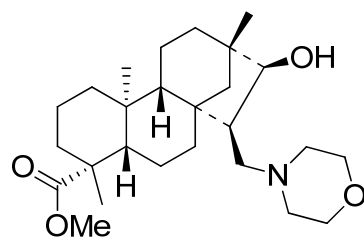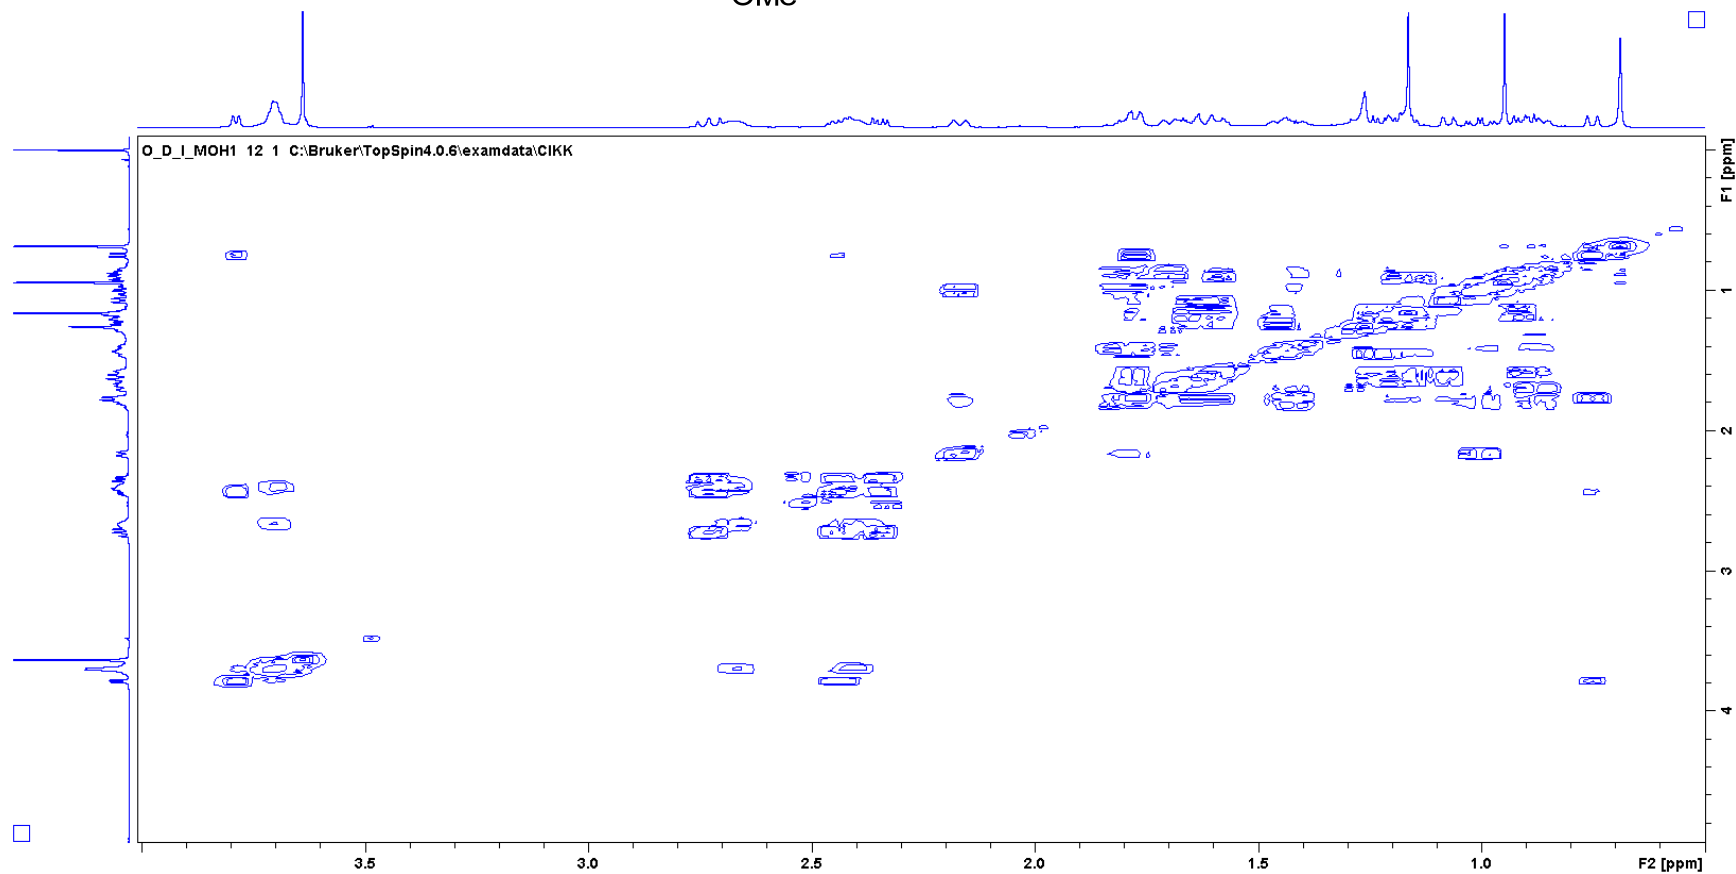

HSQC of compound (4*R*,6*aS*,9*S*,11*bS*)-Methyl 8-hydroxy-4,9,11*b*-trimethyl-7-(morpholinomethyl)tetradecahydro-6*a*,9-methanocyclohepta[*a*]naphthalene-4-carboxylate (**19a**)

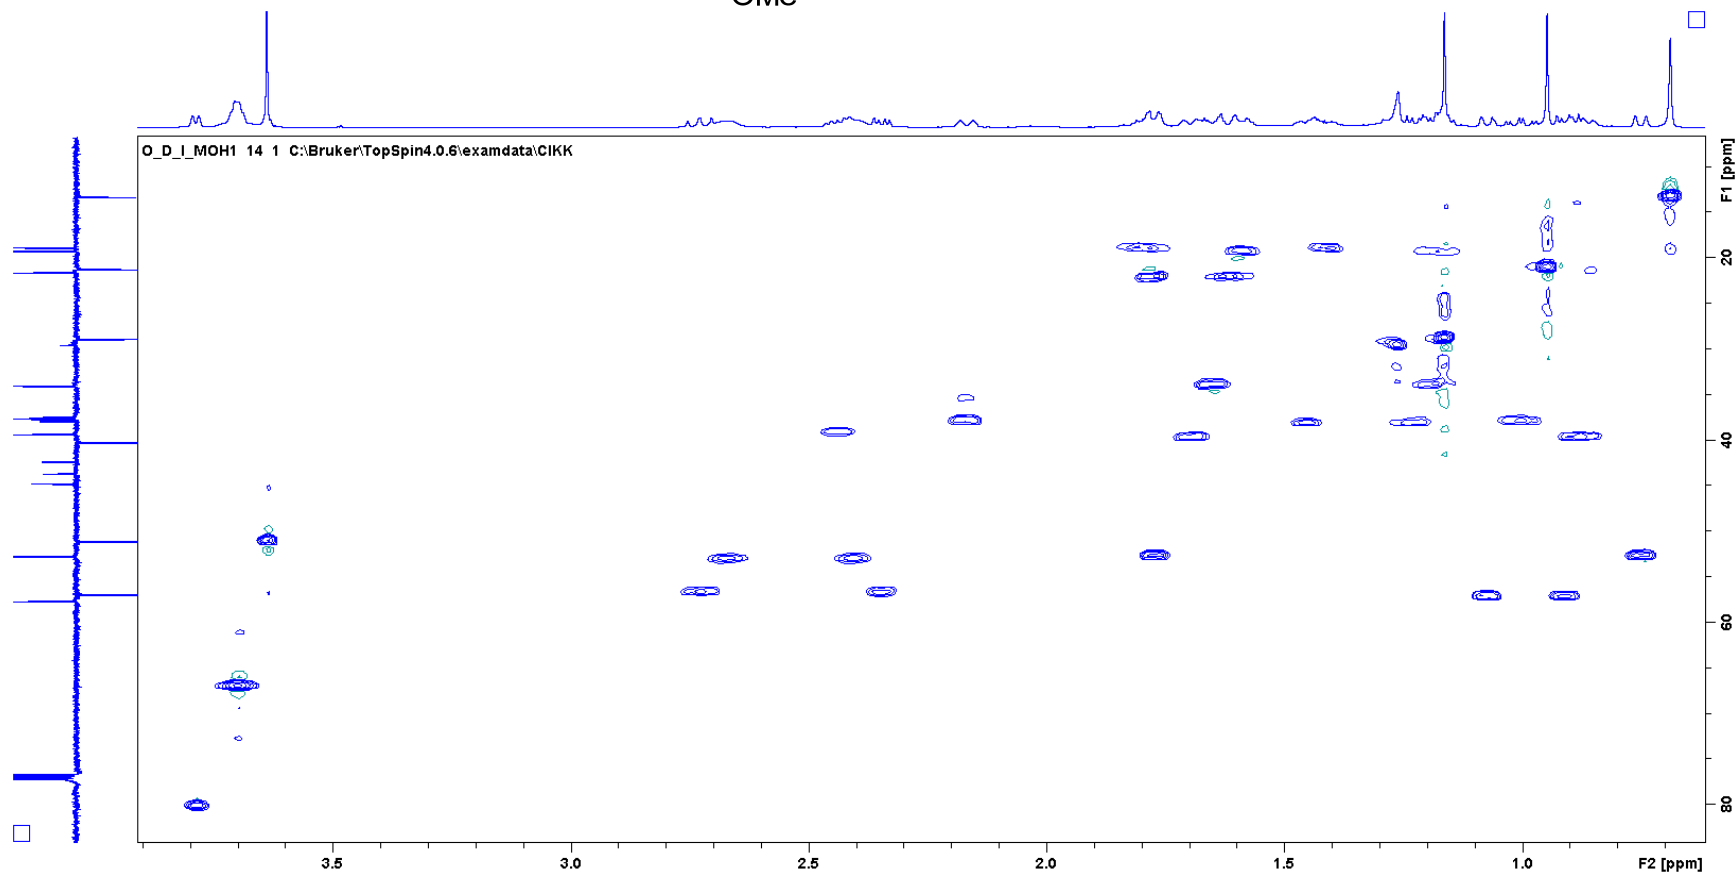

HMBC of compound (4*R*,6*aS*,9*S*,11*bS*)-Methyl 8-hydroxy-4,9,11*b*-trimethyl-7-(morpholinomethyl)tetradecahydro-6*a*,9-methanocyclohepta[*a*]naphthalene-4-carboxylate (**19a**)

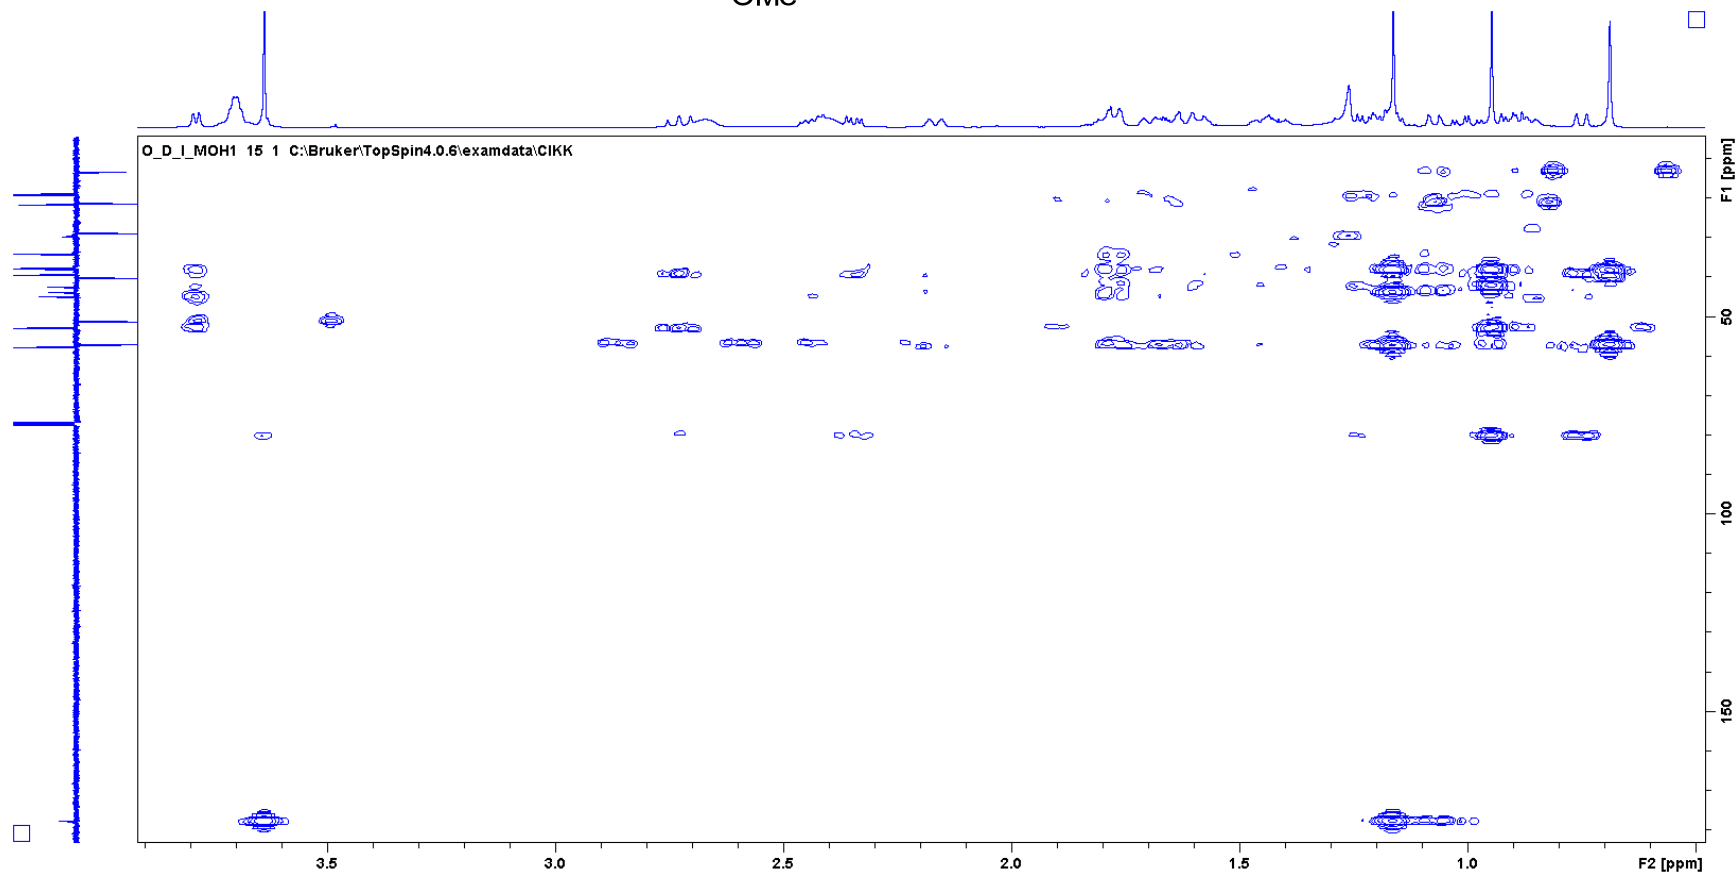

$^1\text{H}$ -NMR of compound (4*R*,6*aS*,8*R*,9*S*,11*bS*)-Methyl 8-hydroxy-4,9,11*b*-trimethyl-7-(morpholinomethyl)tetradecahydro-6*a*,9-methanocyclohepta[*a*]naphthalene-4-carboxylate (**19b**)

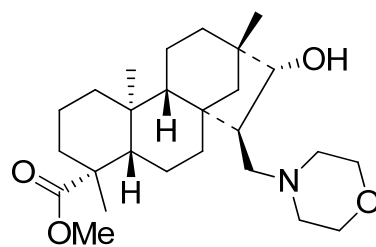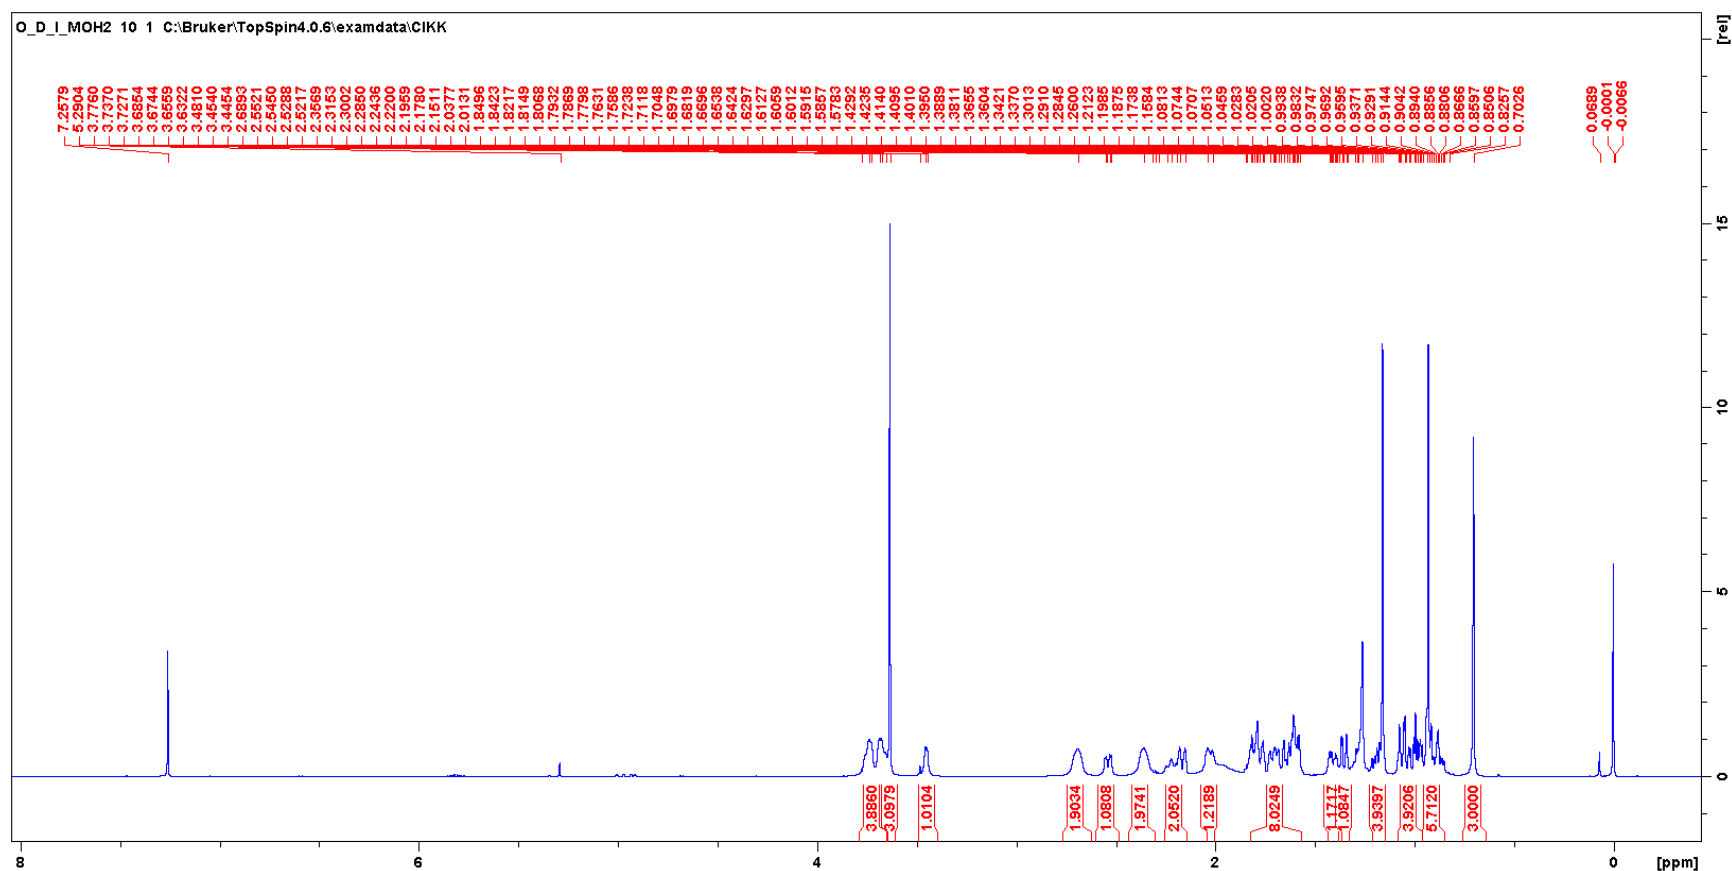

$^{13}\text{C}$ -NMR of compound (4*R*,6*aS*,8*R*,9*S*,11*bS*)-Methyl 8-hydroxy-4,9,11*b*-trimethyl-7-(morpholinomethyl)tetradecahydro-6*a*,9-methanocyclohepta[*a*]naphthalene-4-carboxylate (**19b**)

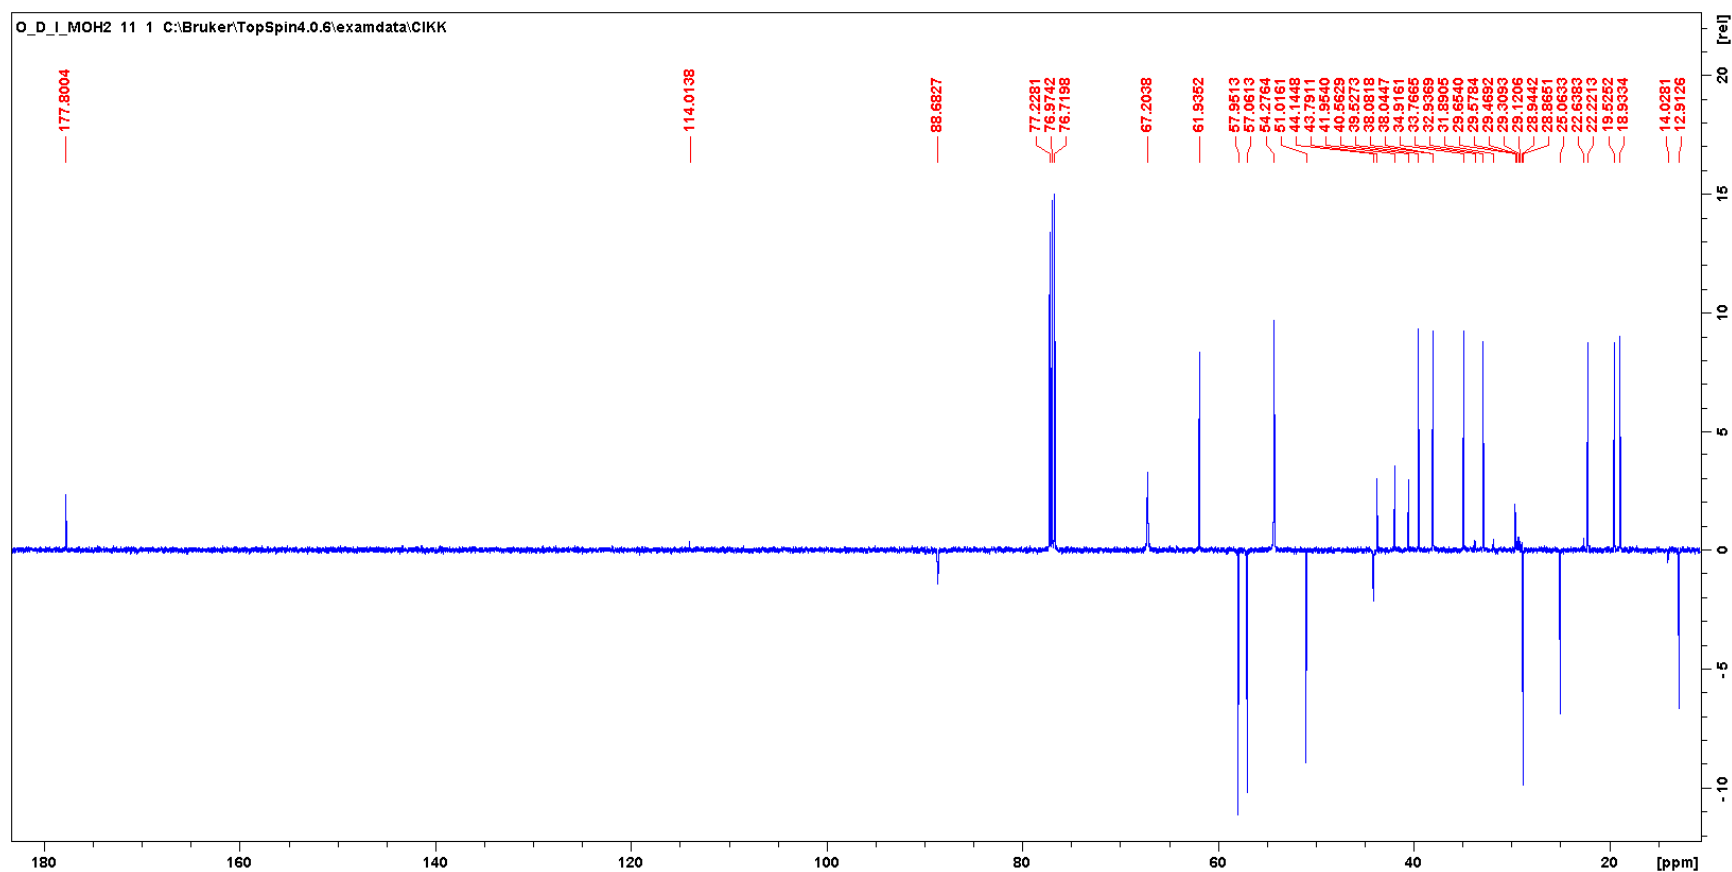

COSY of compound (4R,6aS,8R,9S,11bS)-Methyl 8-hydroxy-4,9,11b-trimethyl-7-(morpholinomethyl)tetradecahydro-6a,9-methanocyclohepta[a]naphthalene-4-carboxylate (**19b**)

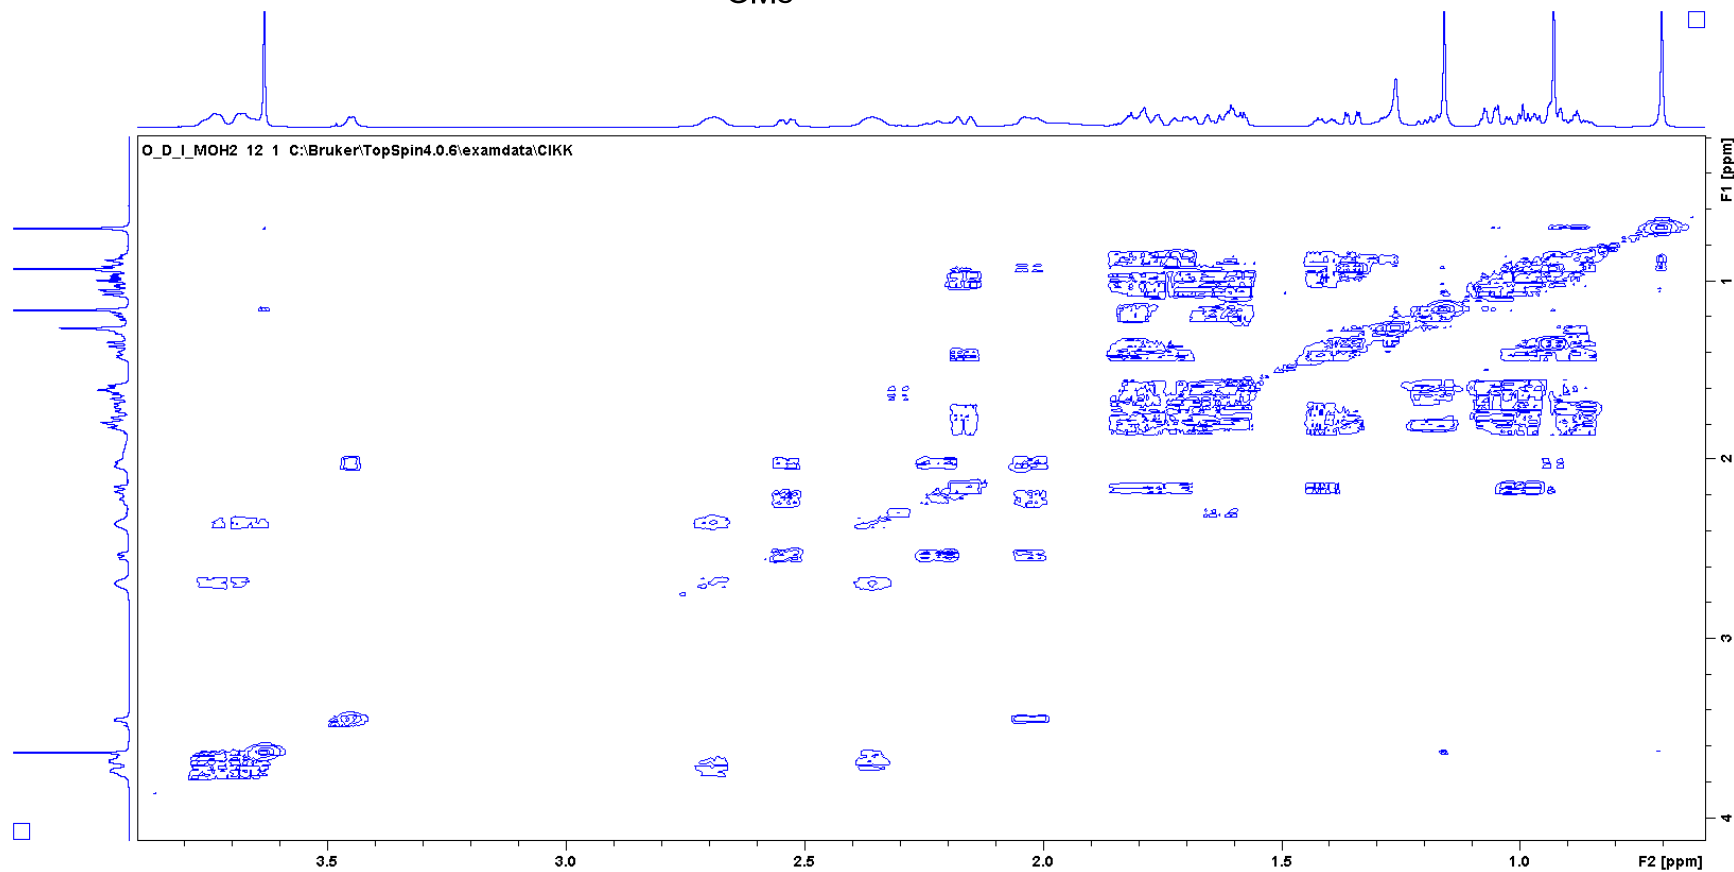

HSQC of compound (4*R*,6*aS*,8*R*,9*S*,11*bS*)-Methyl 8-hydroxy-4,9,11*b*-trimethyl-7-(morpholinomethyl)tetradecahydro-6*a*,9-methanocyclohepta[*a*]naphthalene-4-carboxylate (**19b**)



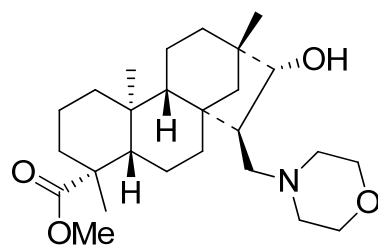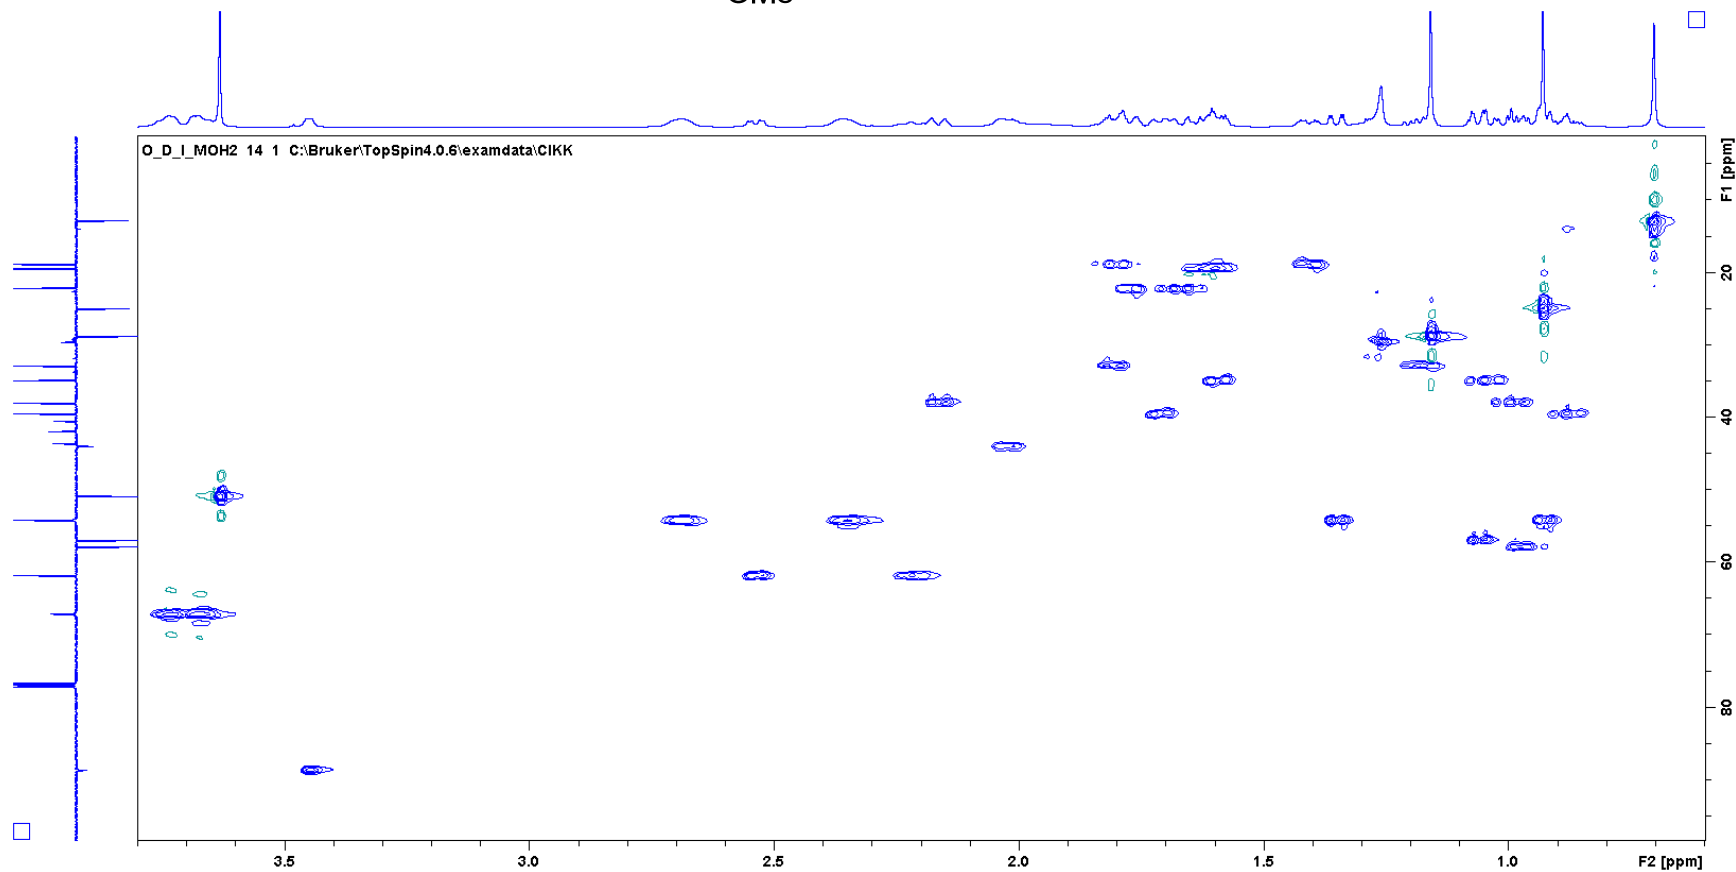

HMBC of compound (4*R*,6*aS*,8*R*,9*S*,11*bS*)-Methyl 8-hydroxy-4,9,11*b*-trimethyl-7-(morpholinomethyl)tetradecahydro-6*a*,9-methanocyclohepta[*a*]naphthalene-4-carboxylate (**19b**)

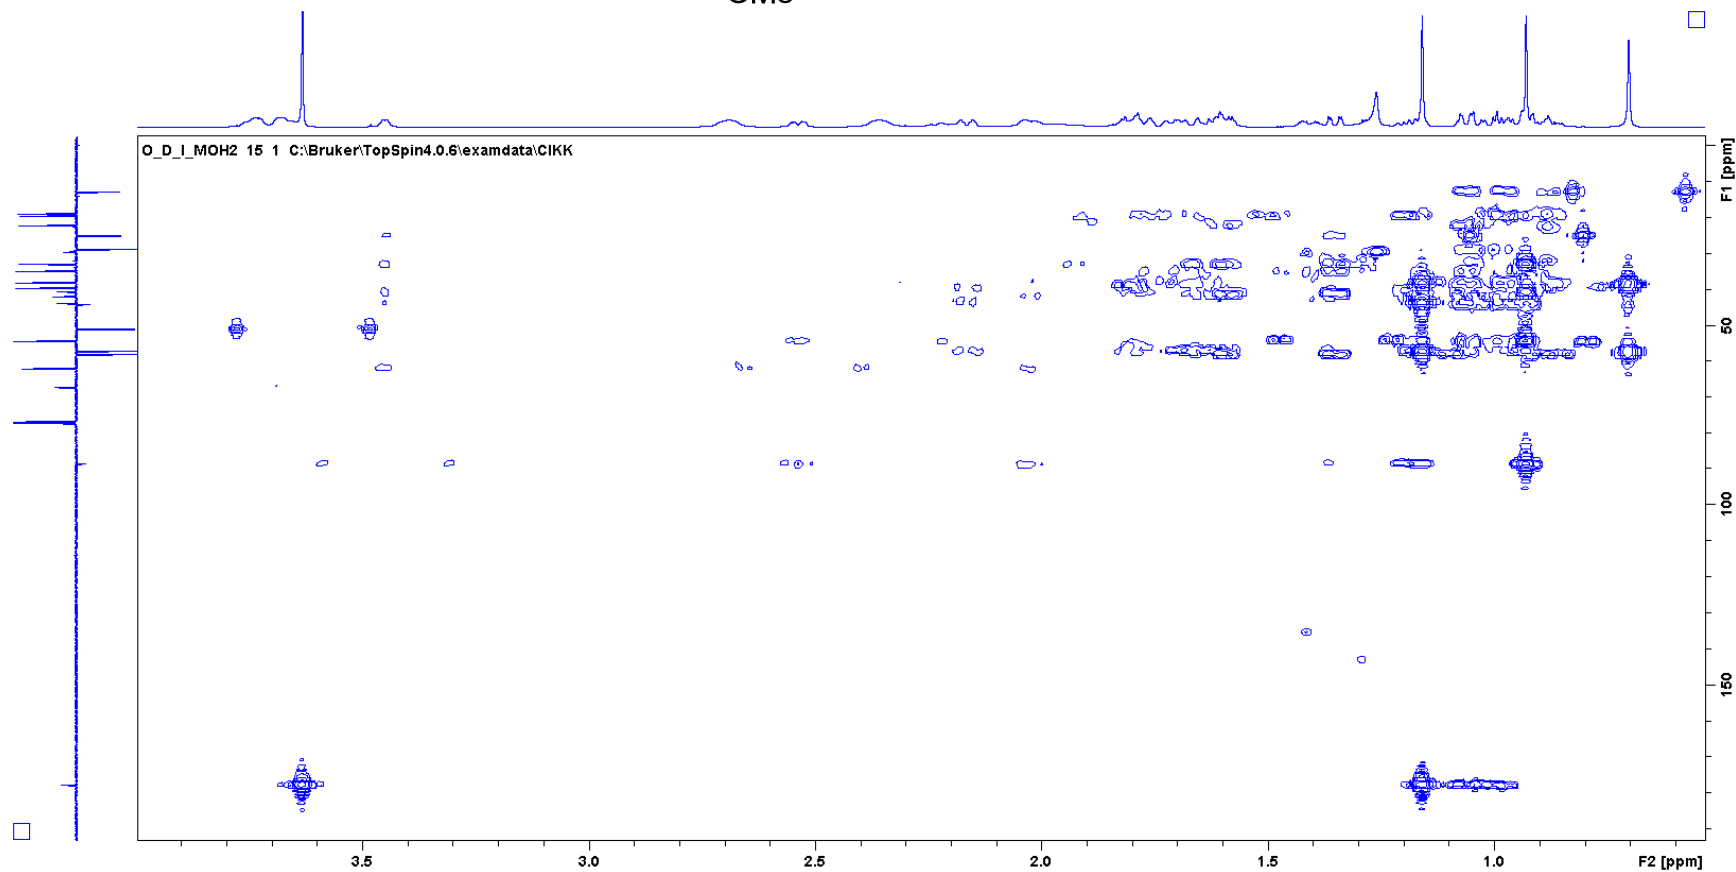

$^1\text{H}$ -NMR of compound (4*R*,6*aS*,9*S*,11*bS*)-Methyl 7-((benzyl(methyl)amino)methyl)-8-hydroxy-4,9,11*b*-trimethyltetradecahydro-6*a*,9-methanocyclohepta[*a*]naphthalene-4-carboxylate (**20a**)

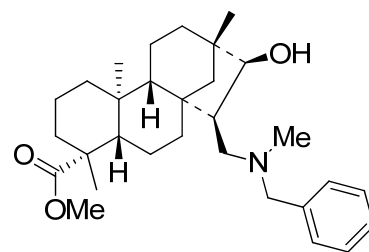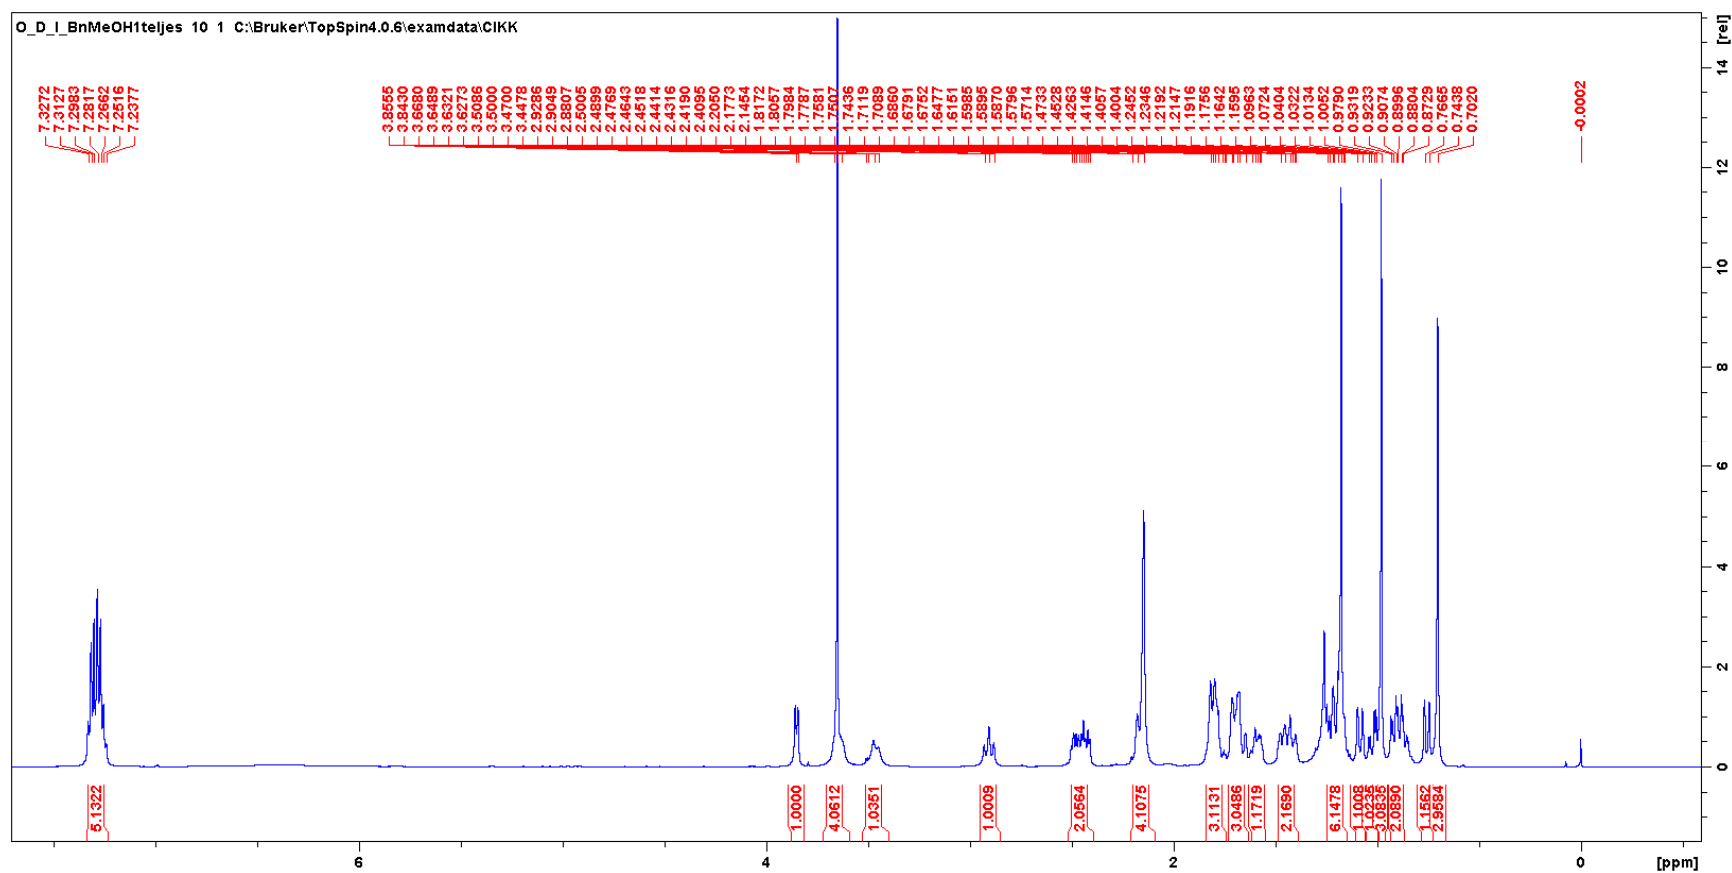

$^{13}\text{C}$ -NMR of compound (4*R*,6*aS*,9*S*,11*bS*)-Methyl 7-((benzyl(methyl)amino)methyl)-8-hydroxy-4,9,11*b*-trimethyltetradecahydro-6*a*,9-methanocyclohepta[*a*]naphthalene-4-carboxylate (**20a**)

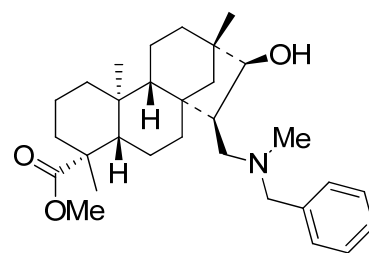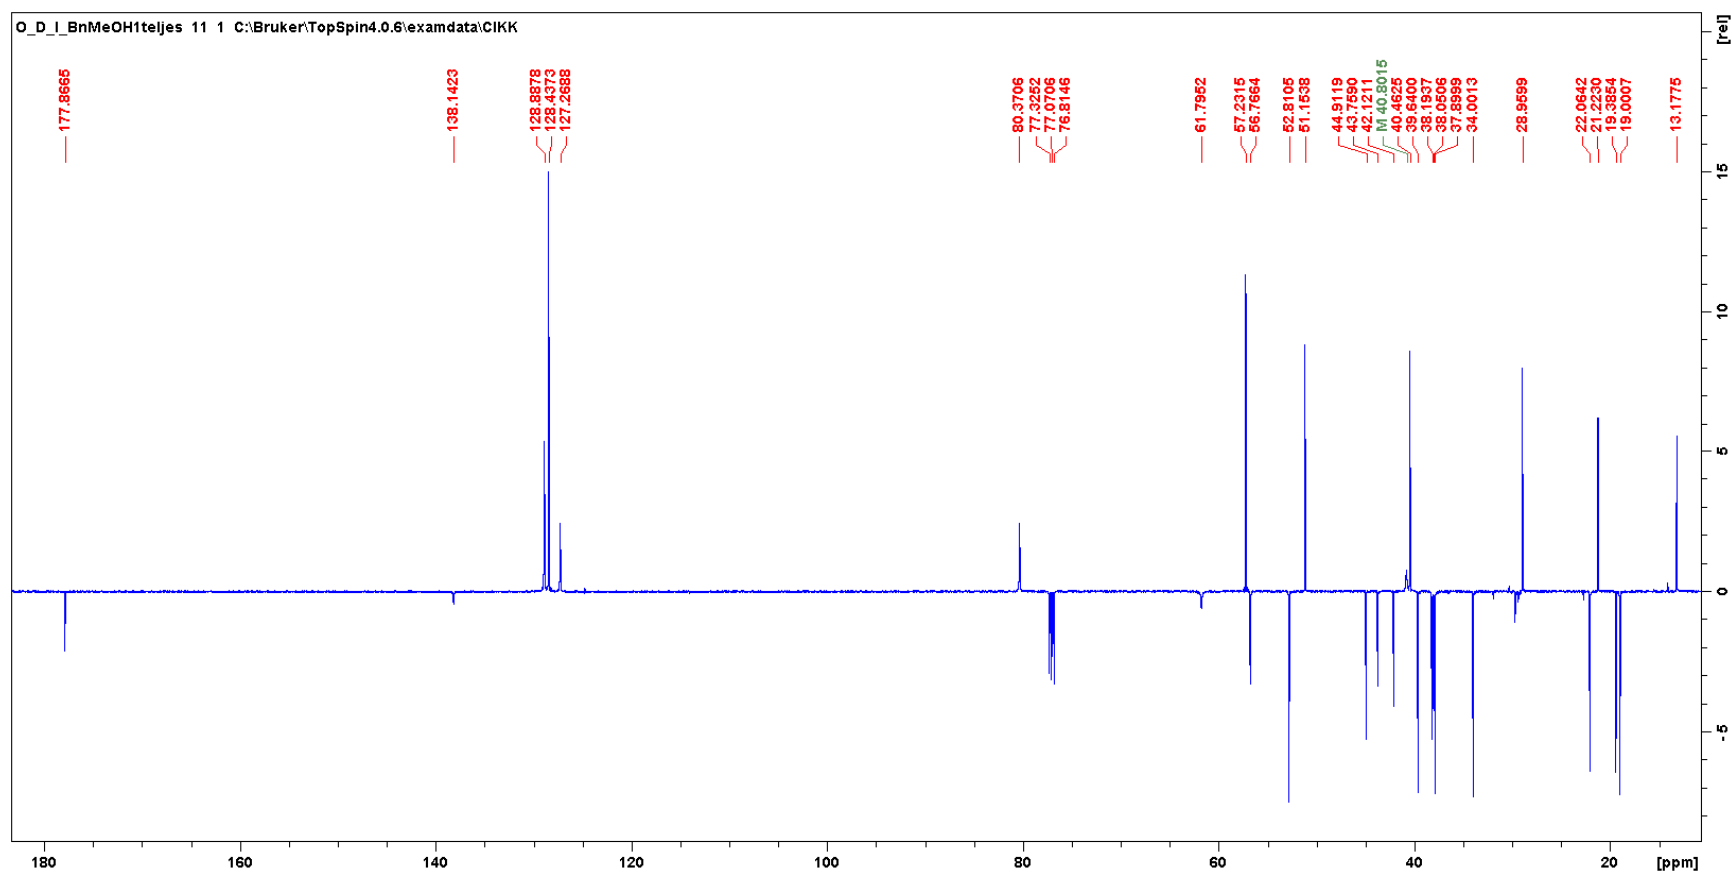

COSY of compound (4*R*,6*aS*,9*S*,11*bS*)-Methyl 7-((benzyl(methyl)amino)methyl)-8-hydroxy-4,9,11*b*-trimethyltetradecahydro-6*a*,9-methanocyclohepta[*a*]naphthalene-4-carboxylate (**20a**)

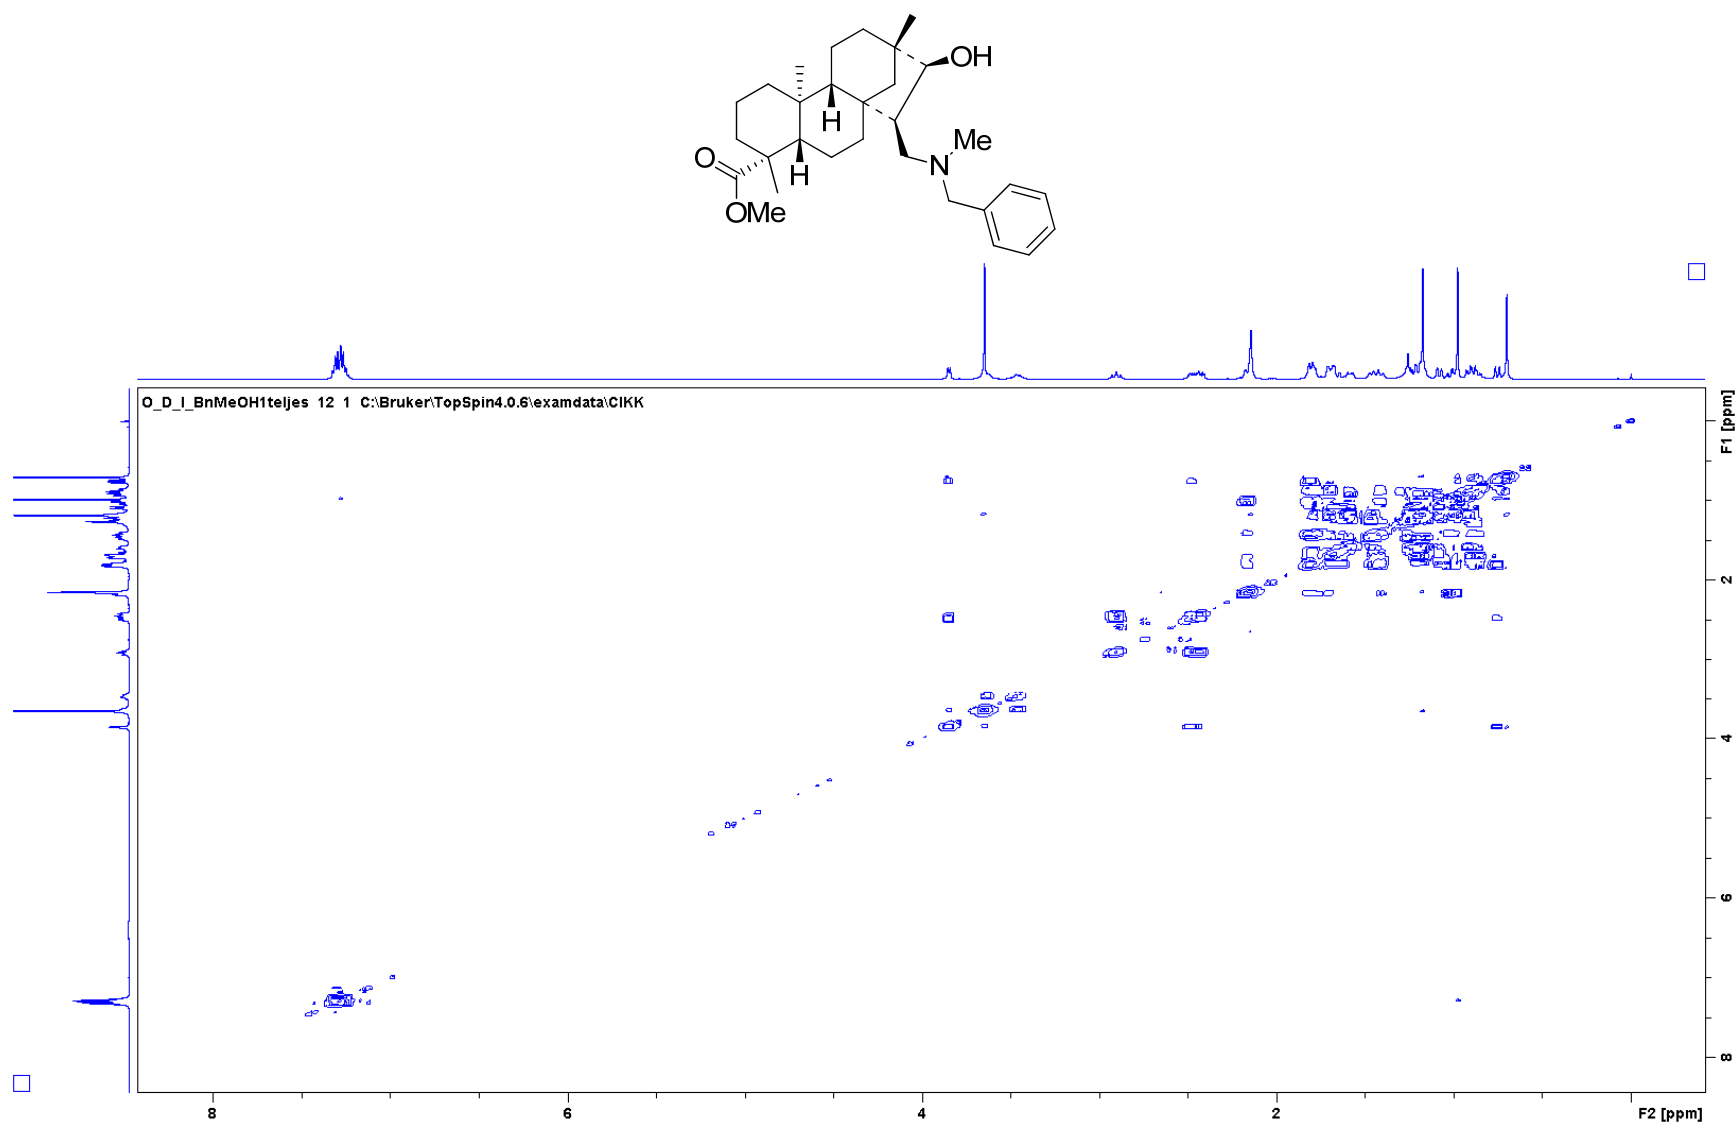

NOESY of compound (4*R*,6*aS*,9*S*,11*bS*)-Methyl 7-((benzyl(methyl)amino)methyl)-8-hydroxy-4,9,11b-trimethyltetradecahydro-6*a*,9-methanocyclohepta[*a*]naphthalene-4-carboxylate (**20a**)

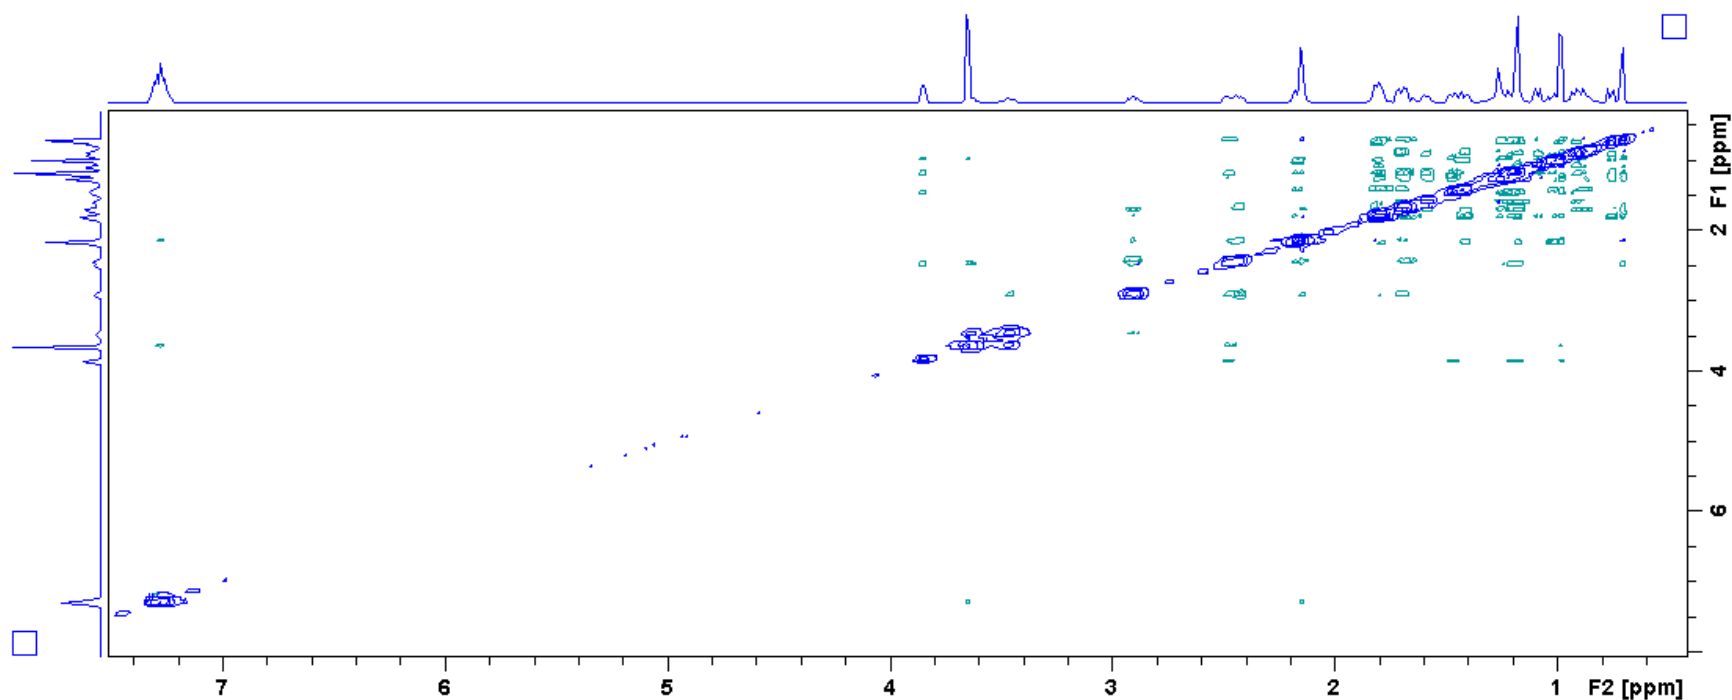

HSQC of compound (4*R*,6*aS*,9*S*,11*bS*)-Methyl 7-((benzyl(methyl)amino)methyl)-8-hydroxy-4,9,11*b*-trimethyltetradecahydro-6*a*,9-methanocyclohepta[*a*]naphthalene-4-carboxylate (**20a**)

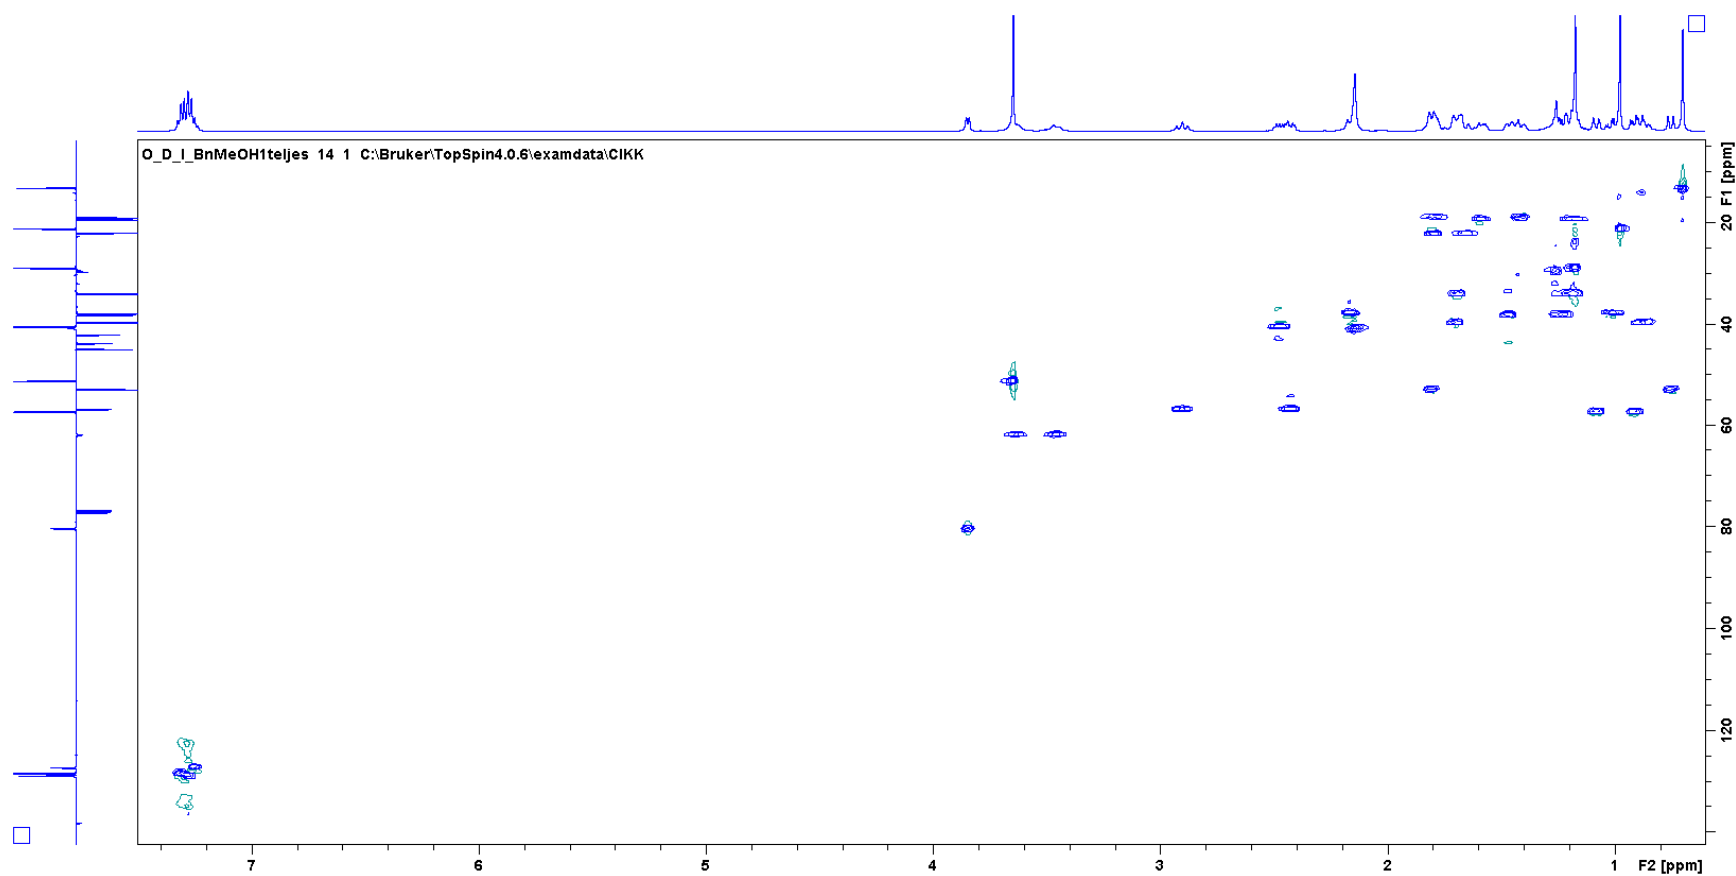

HMBC of compound (4*R*,6*aS*,9*S*,11*bS*)-Methyl 7-((benzyl(methyl)amino)methyl)-8-hydroxy-4,9,11*b*-trimethyltetradecahydro-6*a*,9-methanocyclohepta[*a*]naphthalene-4-carboxylate (**20a**)

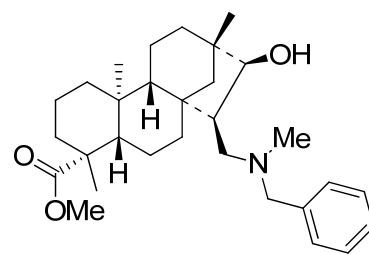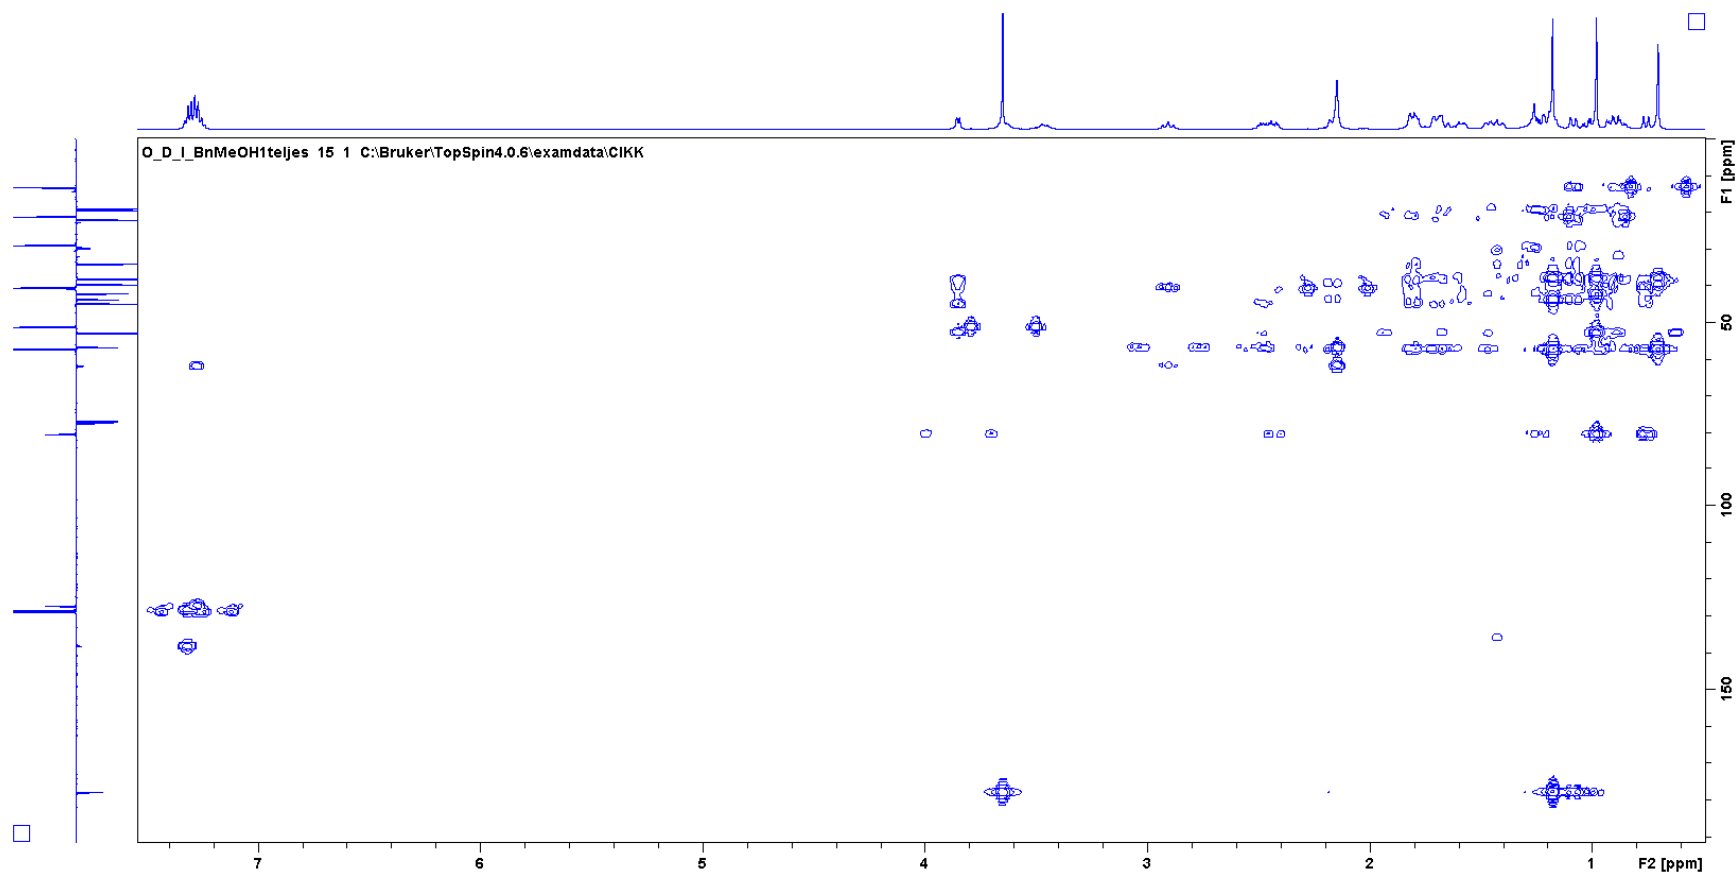

$^1\text{H}$ -NMR of compound (4*R*,6*aS*,8*R*,9*S*,11*bS*)-Methyl 7-((benzyl(methyl)amino)methyl)-8-hydroxy-4,9,11*b*-trimethyltetradecahydro-6*a*,9-methanocyclohepta[*a*]naphthalene-4-carboxylate (**20b**)



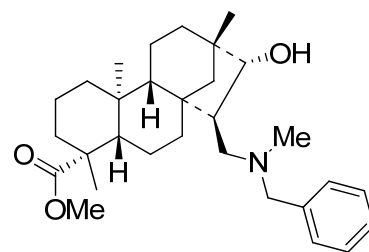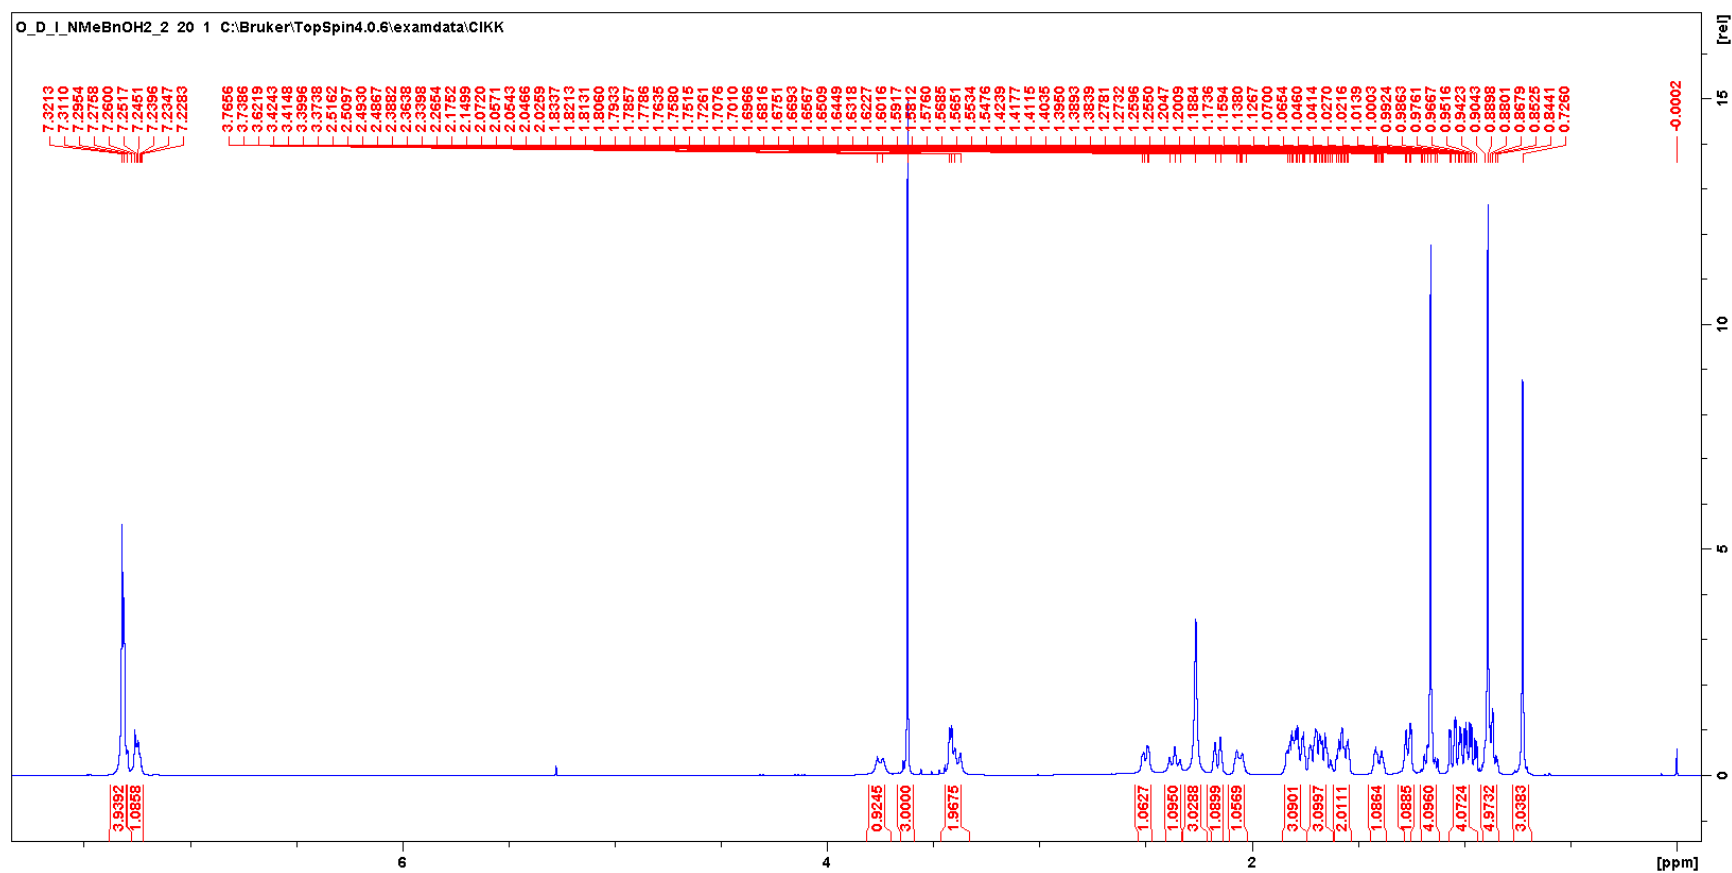

$^{13}\text{C}$ -NMR of compound (4R,6aS,8R,9S,11bS)-Methyl 7-((benzyl(methyl)amino)methyl)-8-hydroxy-4,9,11b-trimethyltetradecahydro-6a,9-methanocyclohepta[a]naphthalene-4-carboxylate (**20b**)

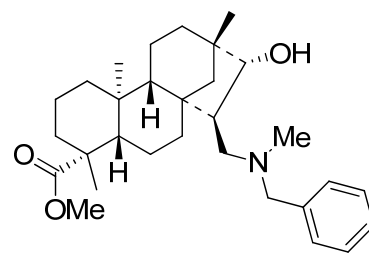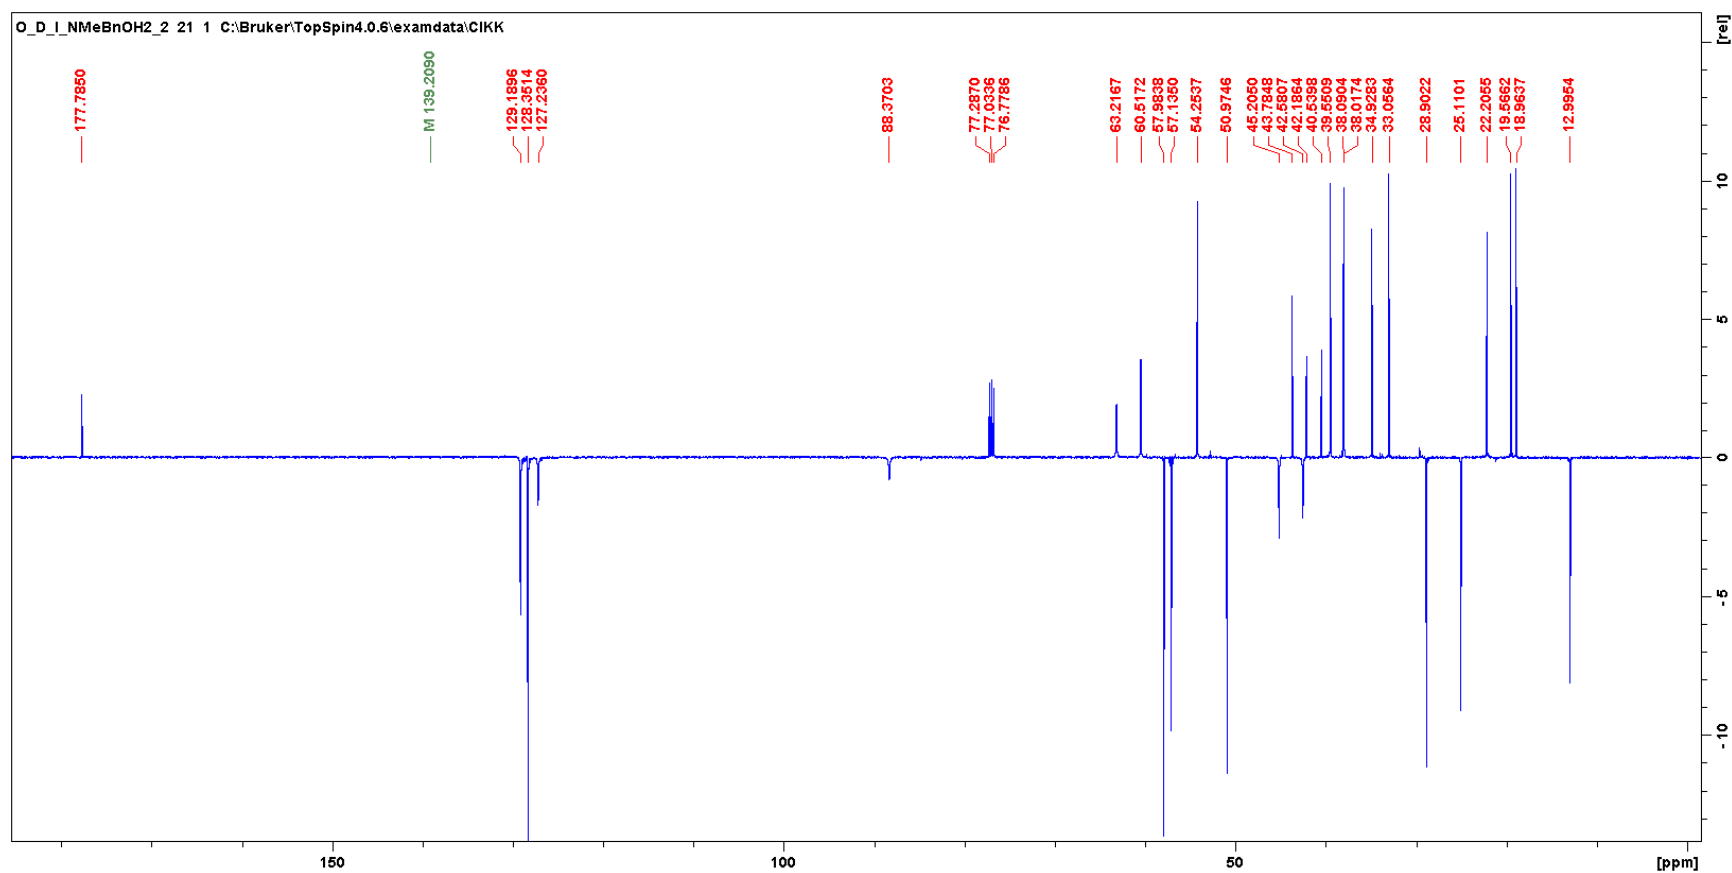

COSY of compound (4*R*,6*aS*,8*R*,9*S*,11*bS*)-Methyl 7-((benzyl(methyl)amino)methyl)-8-hydroxy-4,9,11*b*-trimethyltetradecahydro-6*a*,9-methanocyclohepta[*a*]naphthalene-4-carboxylate (**20b**)

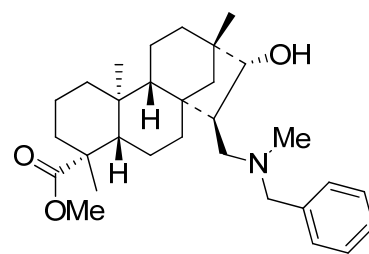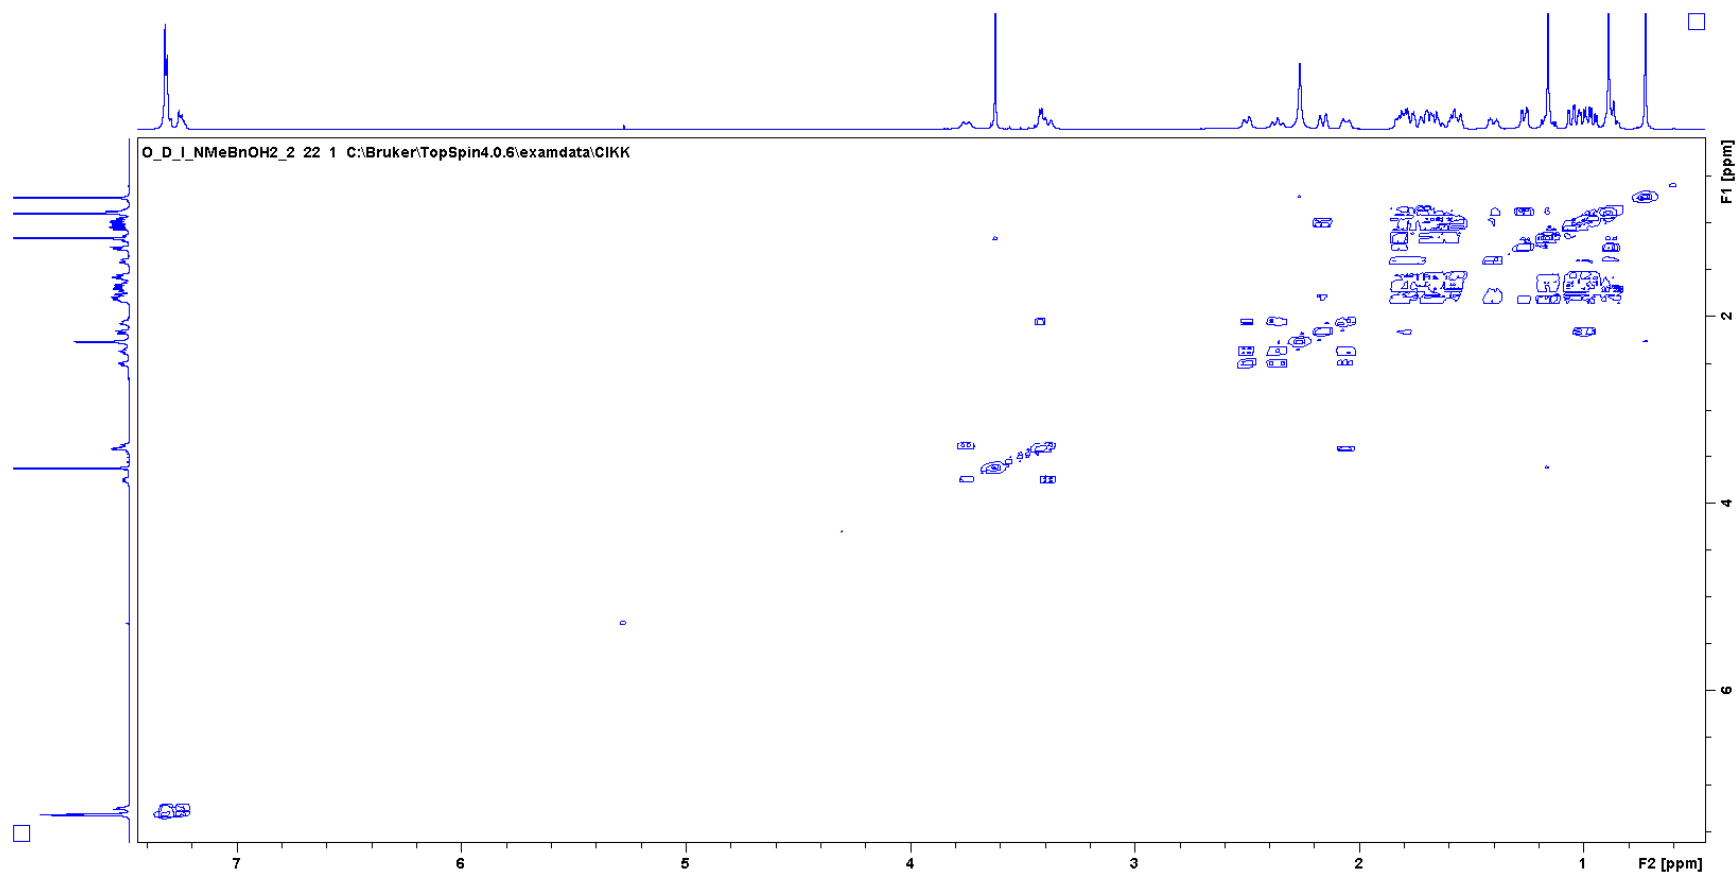

NOESY of compound (4*R*,6*aS*,8*R*,9*S*,11*bS*)-Methyl 7-((benzyl(methyl)amino)methyl)-8-hydroxy-4,9,11*b*-trimethyltetradecahydro-6*a*,9-methanocyclohepta[*a*]naphthalene-4-carboxylate (**20b**)

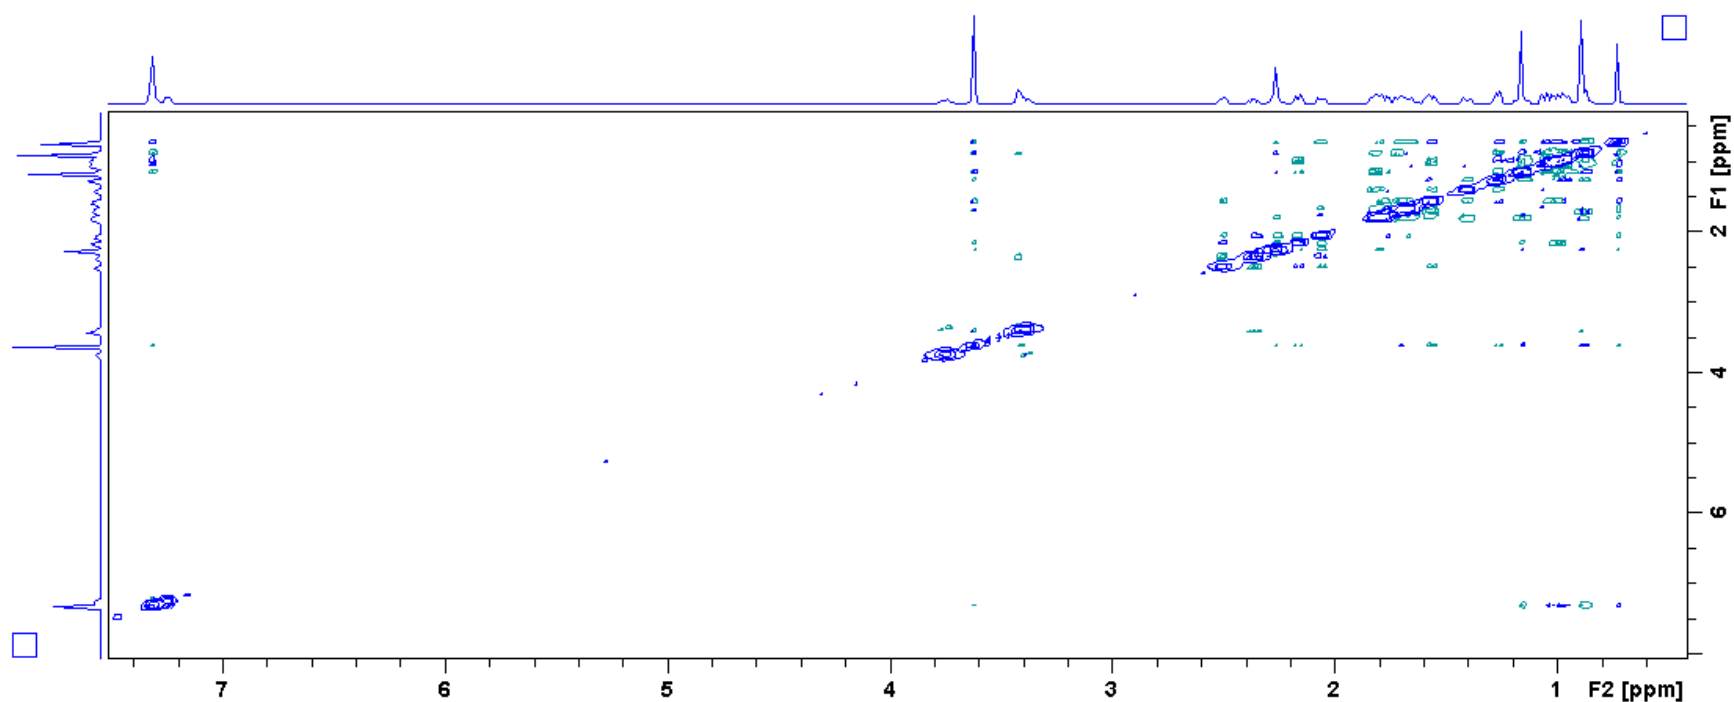

HSQC of compound (4*R*,6*aS*,8*R*,9*S*,11*bS*)-Methyl 7-((benzyl(methyl)amino)methyl)-8-hydroxy-4,9,11*b*-trimethyltetradecahydro-6*a*,9-methanocyclohepta[*a*]naphthalene-4-carboxylate (**20b**)

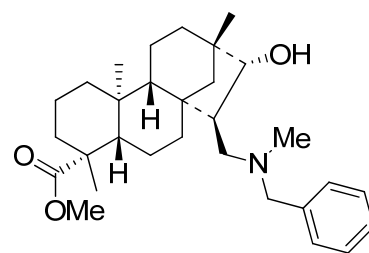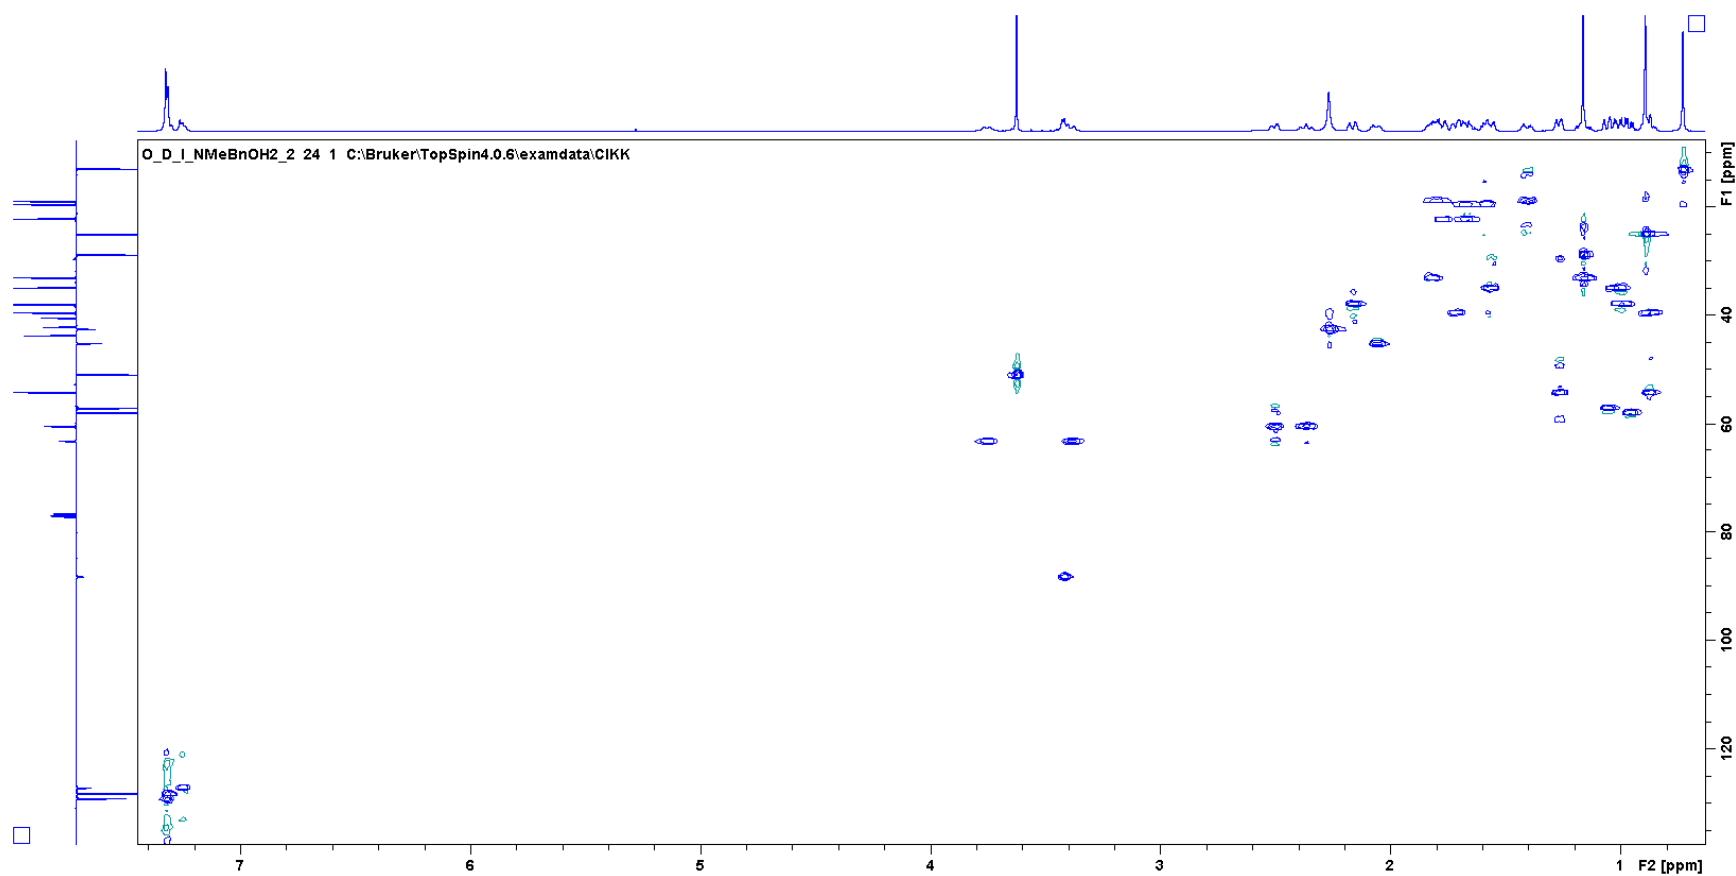

HMBC of compound (4*R*,6*aS*,8*R*,9*S*,11*bS*)-Methyl 7-((benzyl(methyl)amino)methyl)-8-hydroxy-4,9,11b-trimethyltetradecahydro-6*a*,9-methanocyclohepta[*a*]naphthalene-4-carboxylate (**20b**)

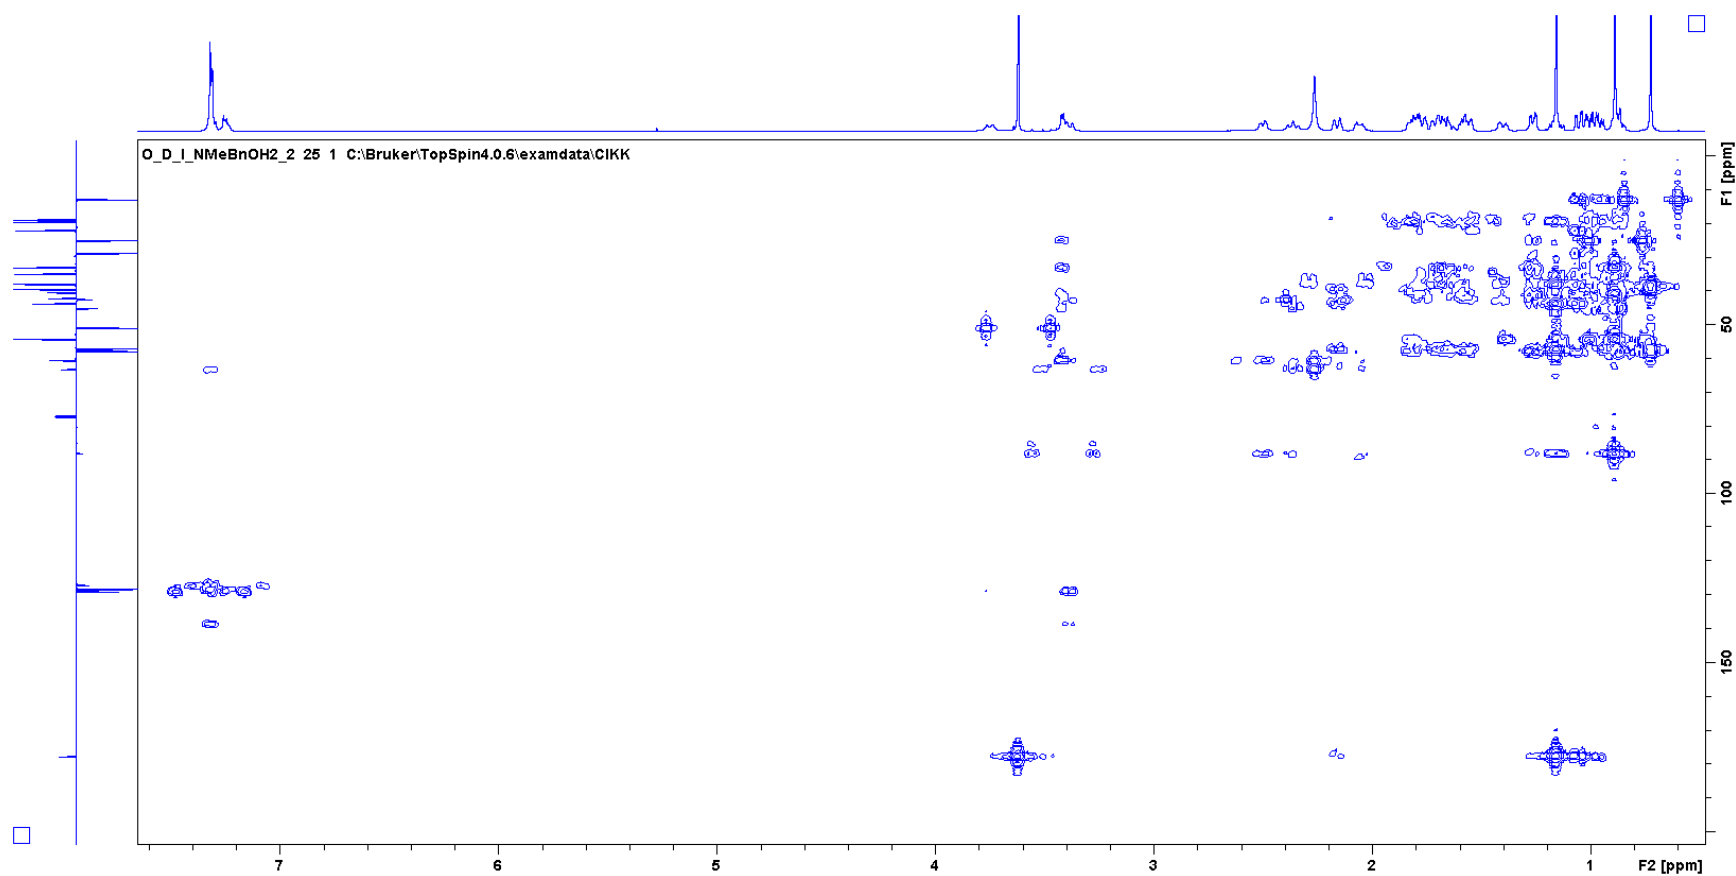

$^1\text{H}$ -NMR of compound (4*R*,6*aS*,8*R*,9*S*,11*bS*)-Methyl 8-hydroxy-4,9,11*b*-trimethyl-7-(pyrrolidin-1-ylmethyl)tetradecahydro-6*a*,9-methanocyclohepta[*a*]naphthalene-4-carboxylate (**21**)

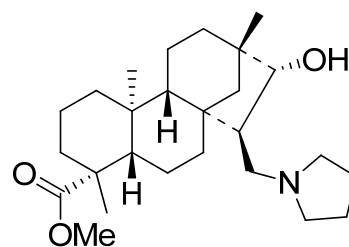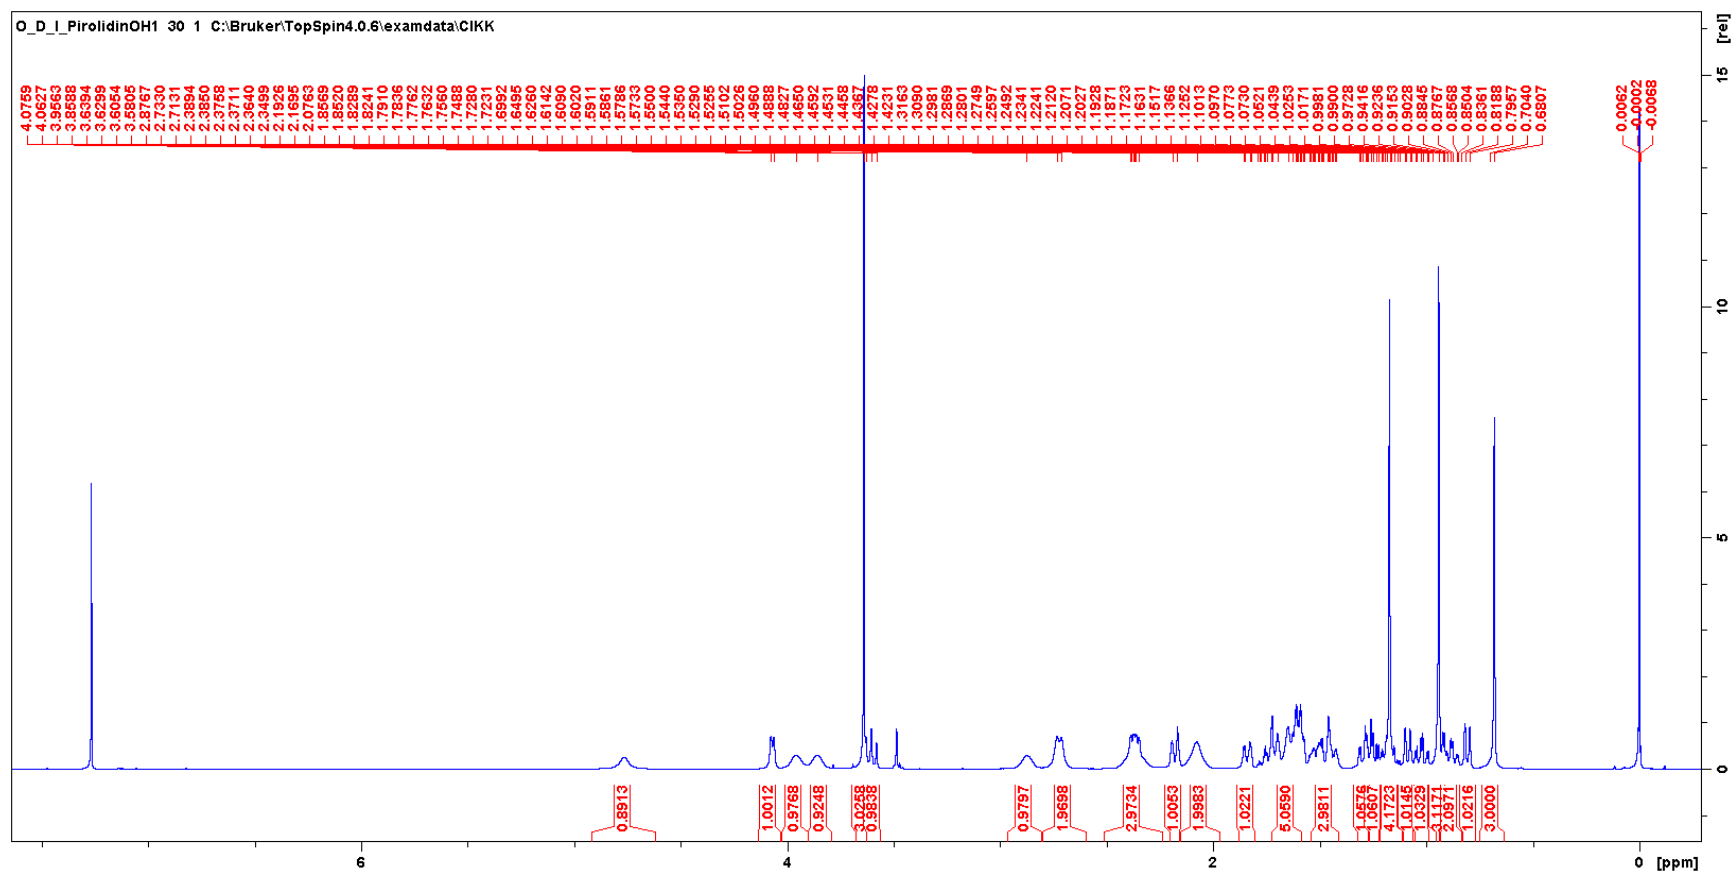

$^{13}\text{C}$ -NMR of compound (4*R*,6*aS*,8*R*,9*S*,11*bS*)-Methyl 8-hydroxy-4,9,11*b*-trimethyl-7-(pyrrolidin-1-ylmethyl)tetradecahydro-6*a*,9-methanocyclohepta[*a*]naphthalene-4-carboxylate (**21**)

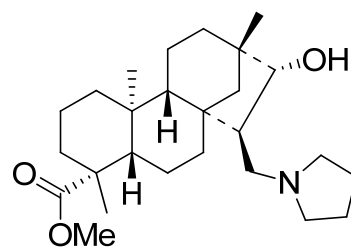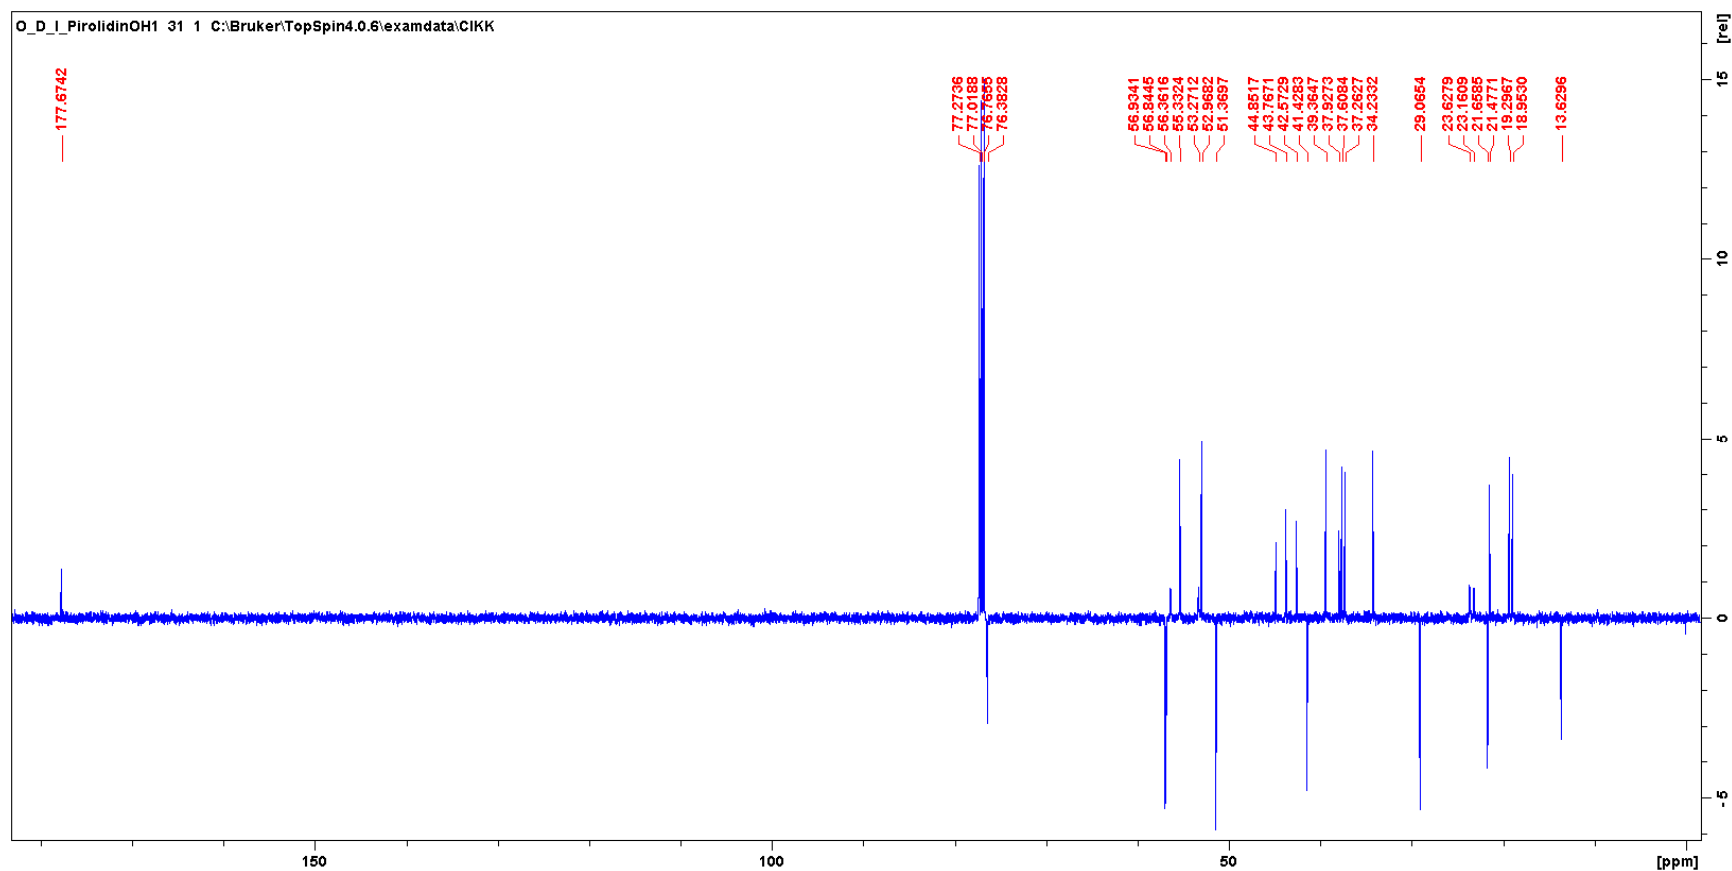

COSY of compound (4R,6aS,8R,9S,11bS)-Methyl 8-hydroxy-4,9,11b-trimethyl-7-(pyrrolidin-1-ylmethyl)tetradecahydro-6a,9-methanocyclohepta[a]naphthalene-4-carboxylate (**21**)



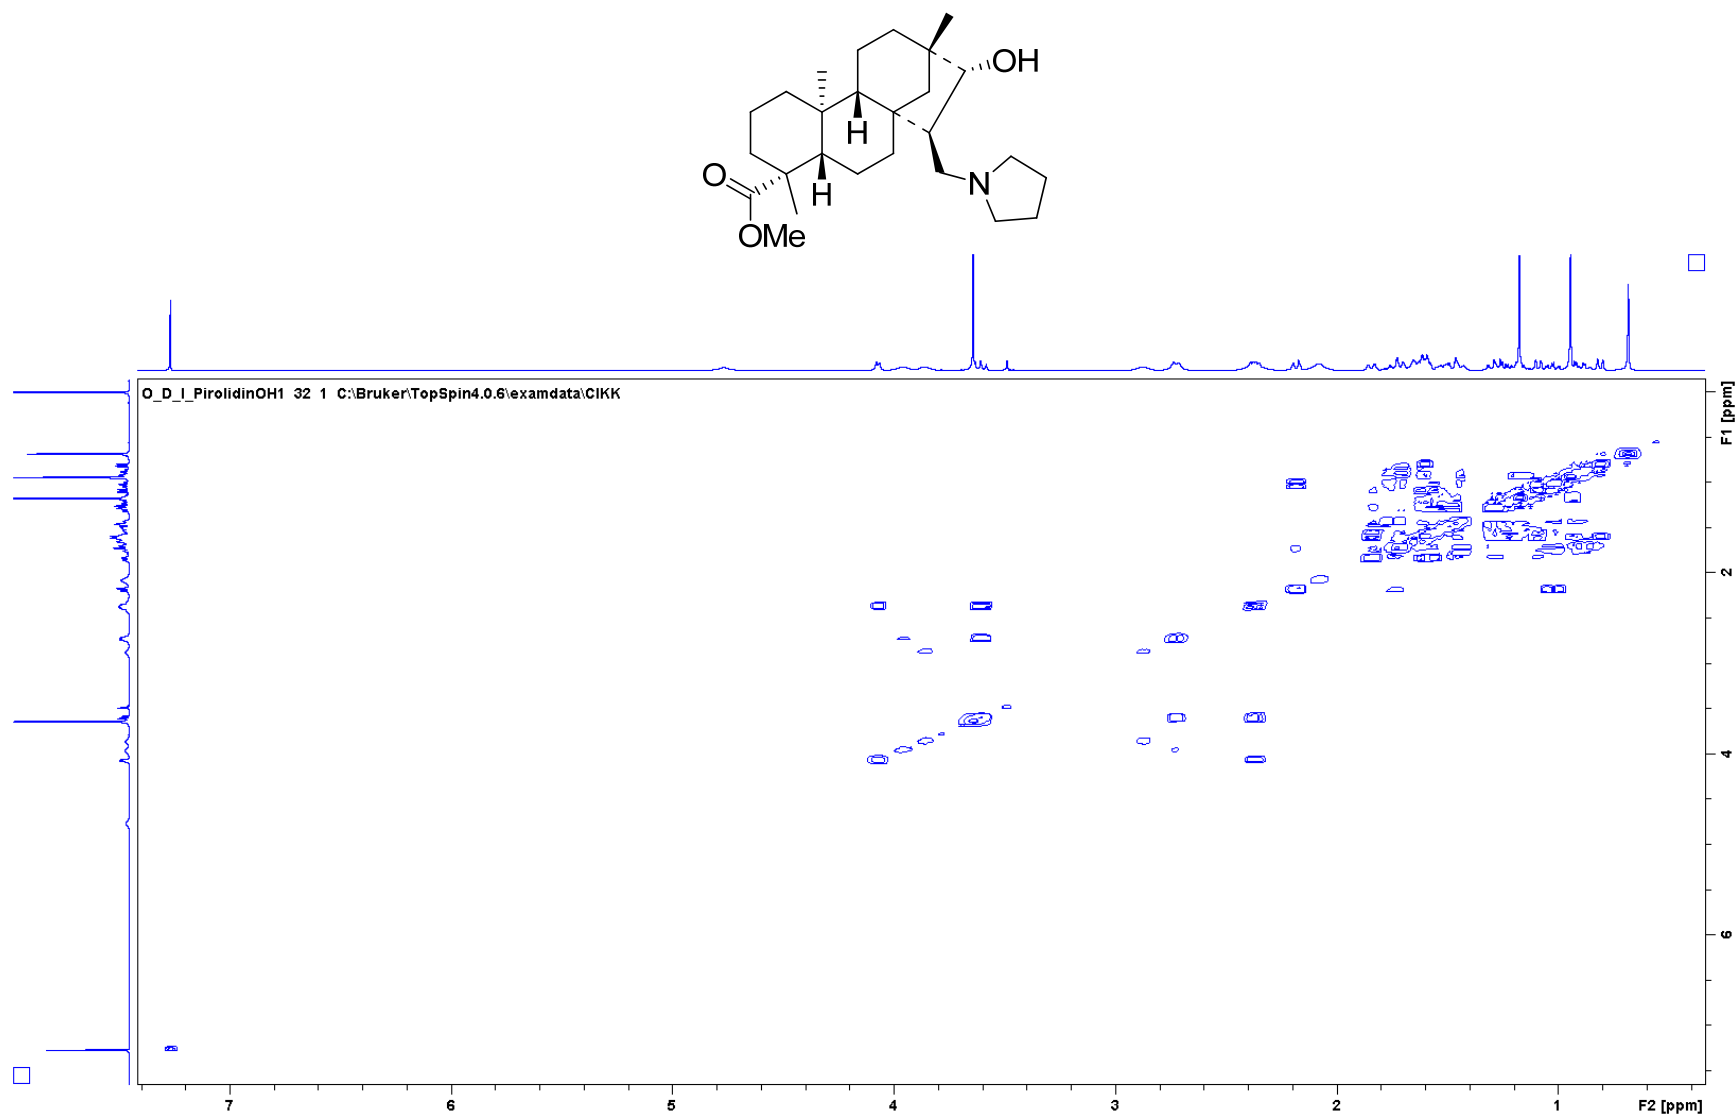

NOESY of compound (4R,6aS,8R,9S,11bS)-Methyl 8-hydroxy-4,9,11b-trimethyl-7-(pyrrolidin-1-ylmethyl)tetradecahydro-6a,9-methanocyclohepta[a]naphthalene-4-carboxylate (**21**)

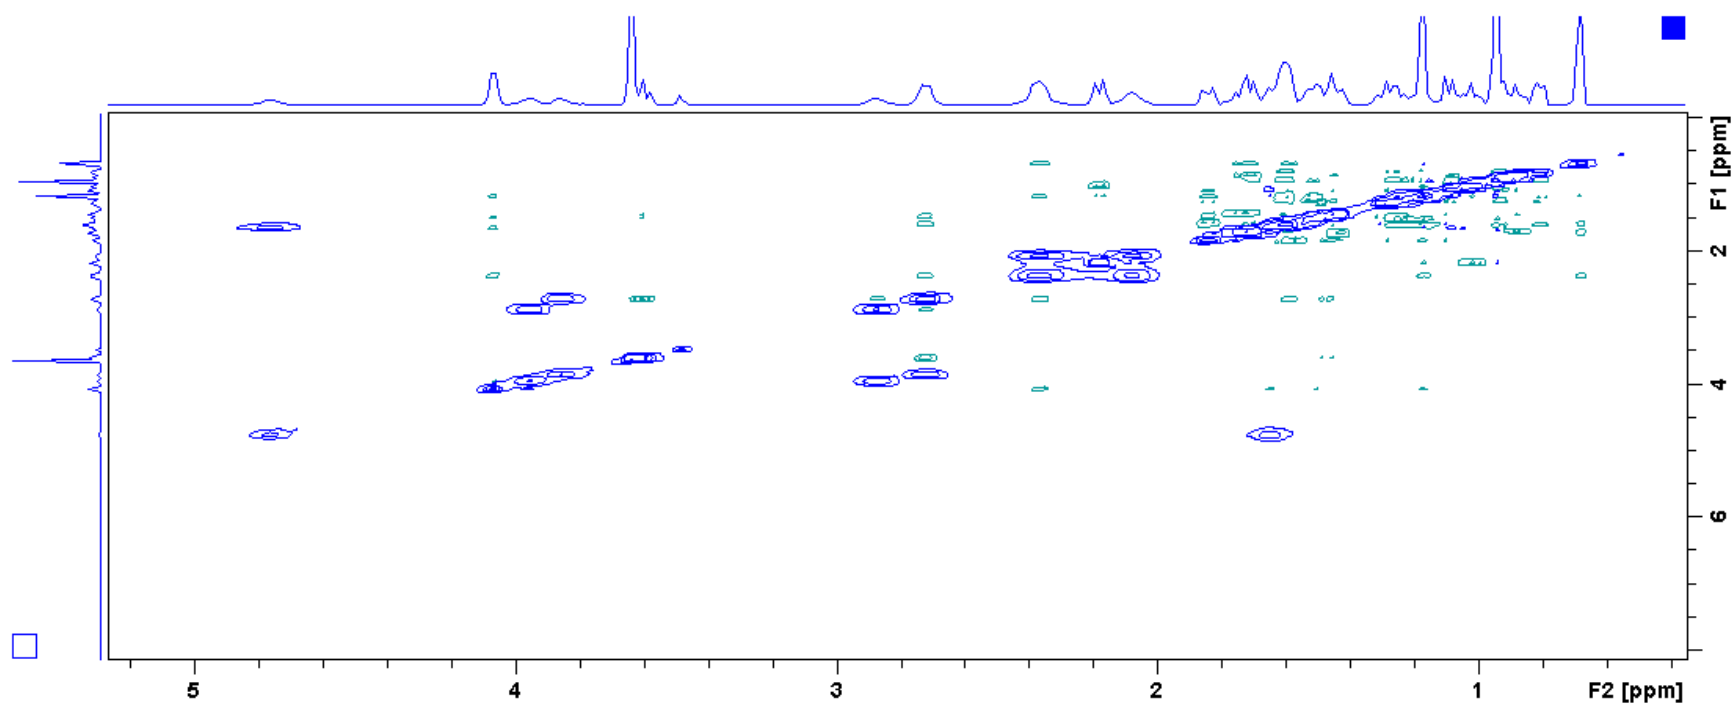

HSQC of compound (4*R*,6*aS*,8*R*,9*S*,11*bS*)-Methyl 8-hydroxy-4,9,11*b*-trimethyl-7-(pyrrolidin-1-ylmethyl)tetradecahydro-6*a*,9-methanocyclohepta[*a*]naphthalene-4-carboxylate (**21**)

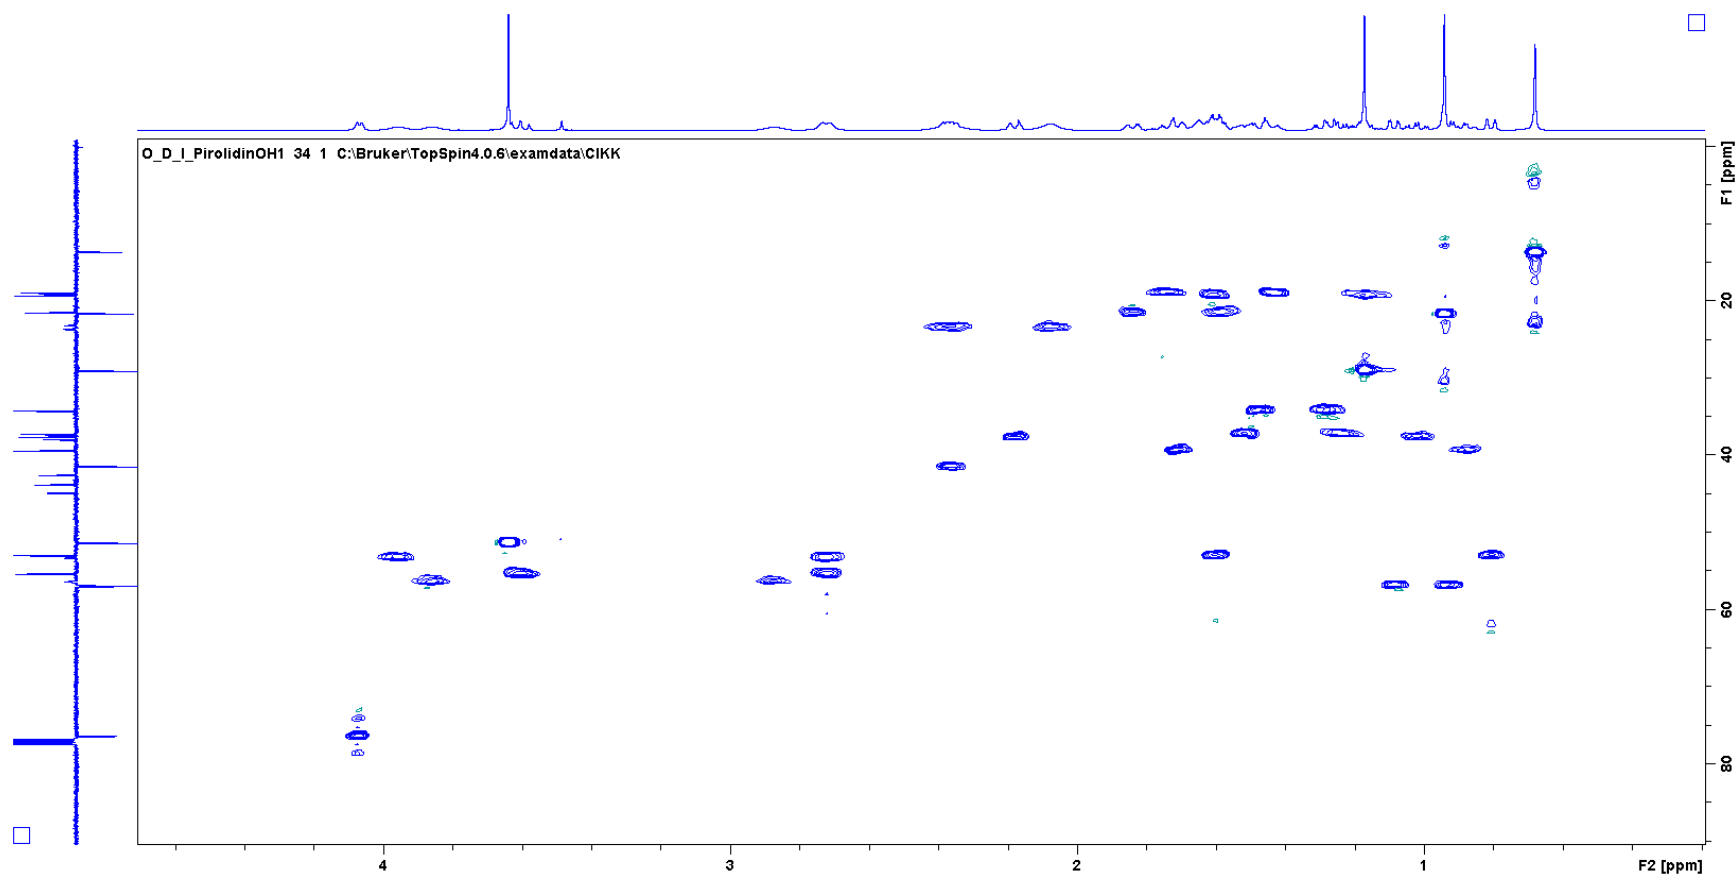

HMBC of compound (4R,6a*S*,8*R*,9*S*,11*bS*)-Methyl 8-hydroxy-4,9,11*b*-trimethyl-7-(pyrrolidin-1-ylmethyl)tetradecahydro-6*a*,9-methanocyclohepta[*a*]naphthalene-4-carboxylate (**21**)

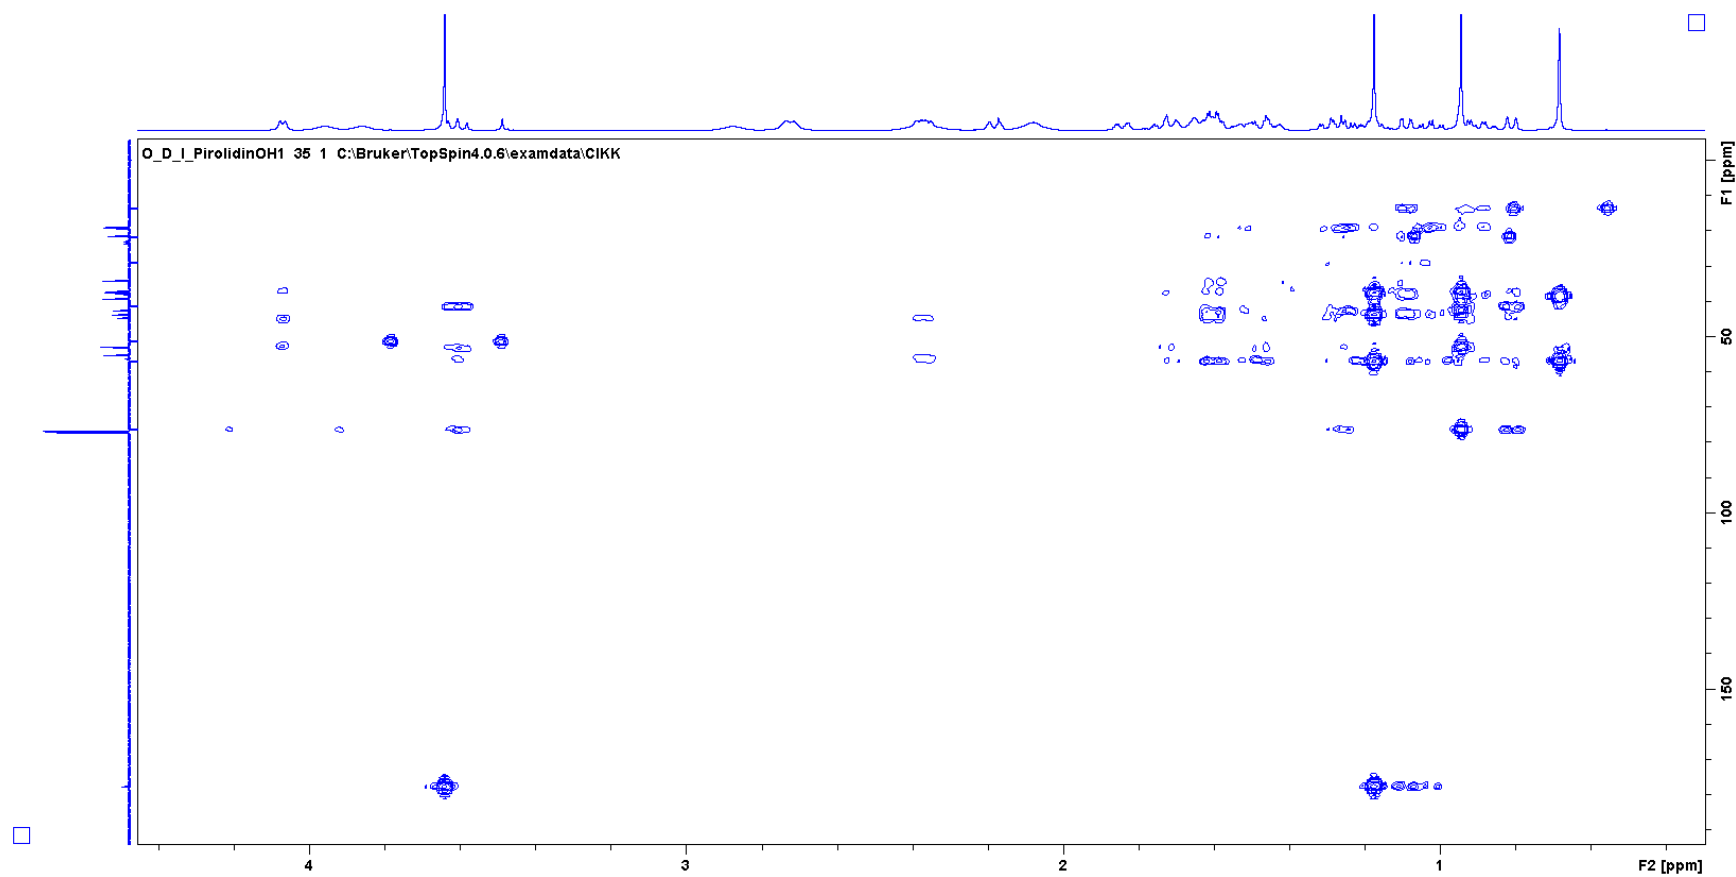

$^1\text{H}$ -NMR of compound (4*R*,6*aS*,8*R*,9*S*,11*bS*)-Methyl 7-((dimethylamino)methyl)-8-hydroxy-4,9,11*b*-trimethyltetradecahydro-6*a*,9-methanocyclohepta[*a*]naphthalene-4-carboxylate (**22**)

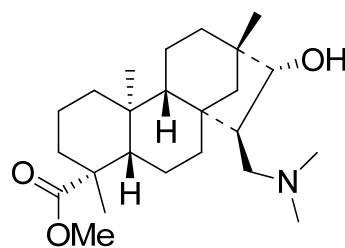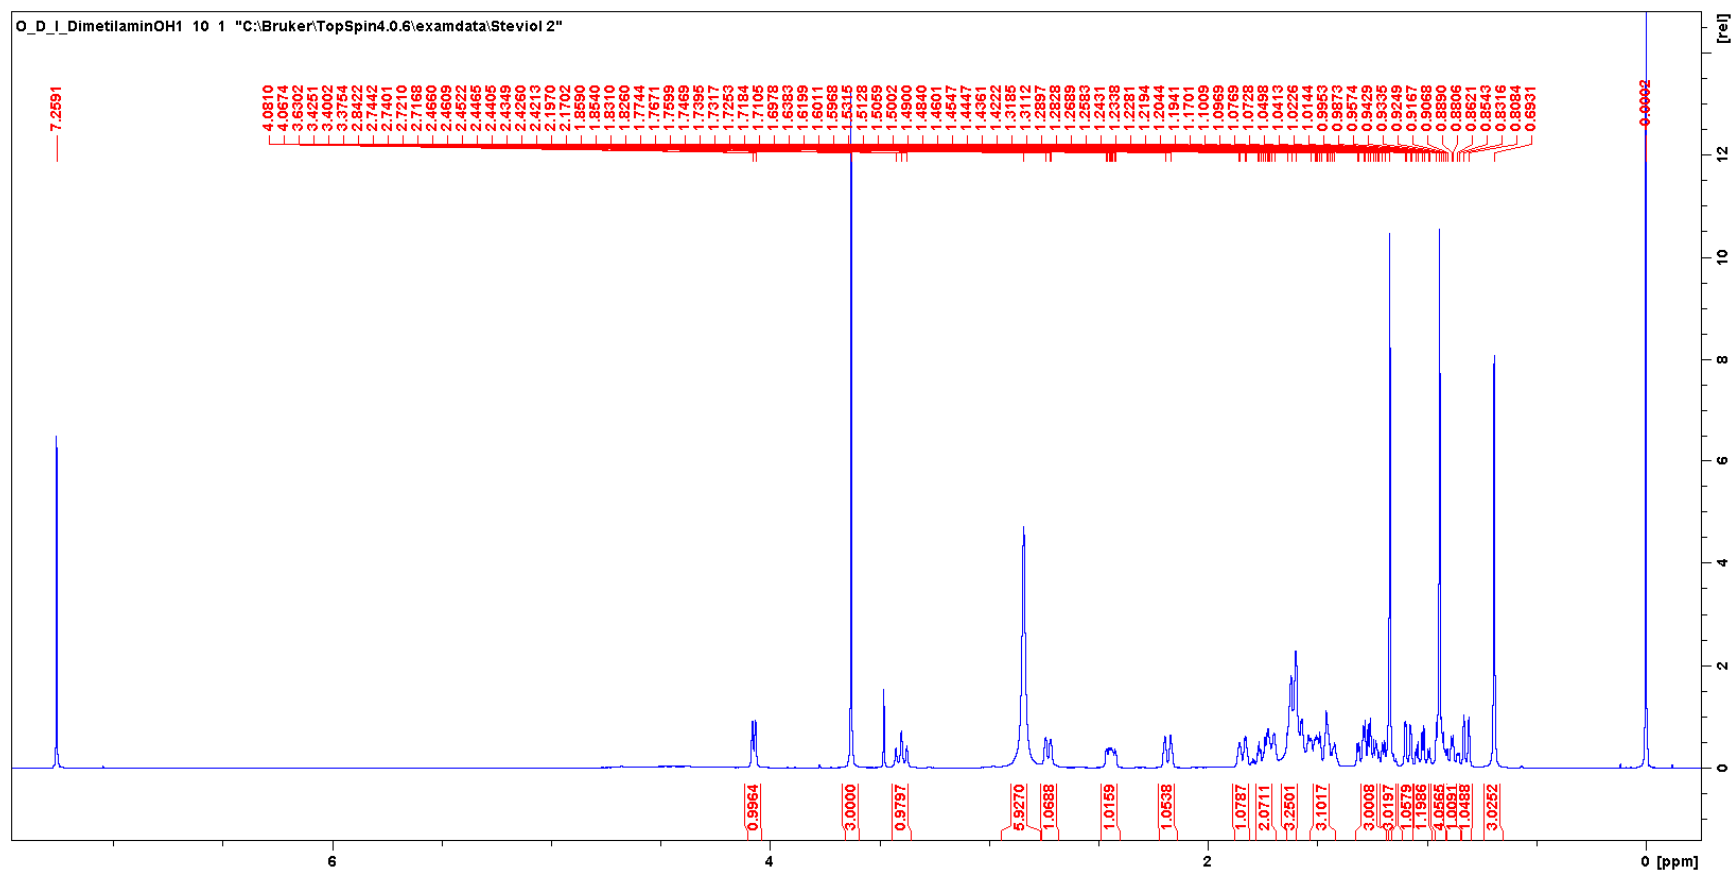

$^{13}\text{C}$ -NMR of compound (4*R*,6*aS*,8*R*,9*S*,11*bS*)-Methyl 7-((dimethylamino)methyl)-8-hydroxy-4,9,11*b*-trimethyltetradecahydro-6*a*,9-methanocyclohepta[*a*]naphthalene-4-carboxylate (**22**)

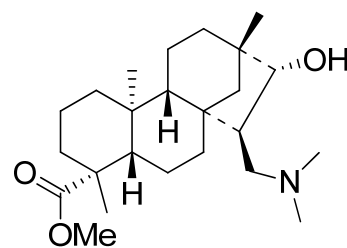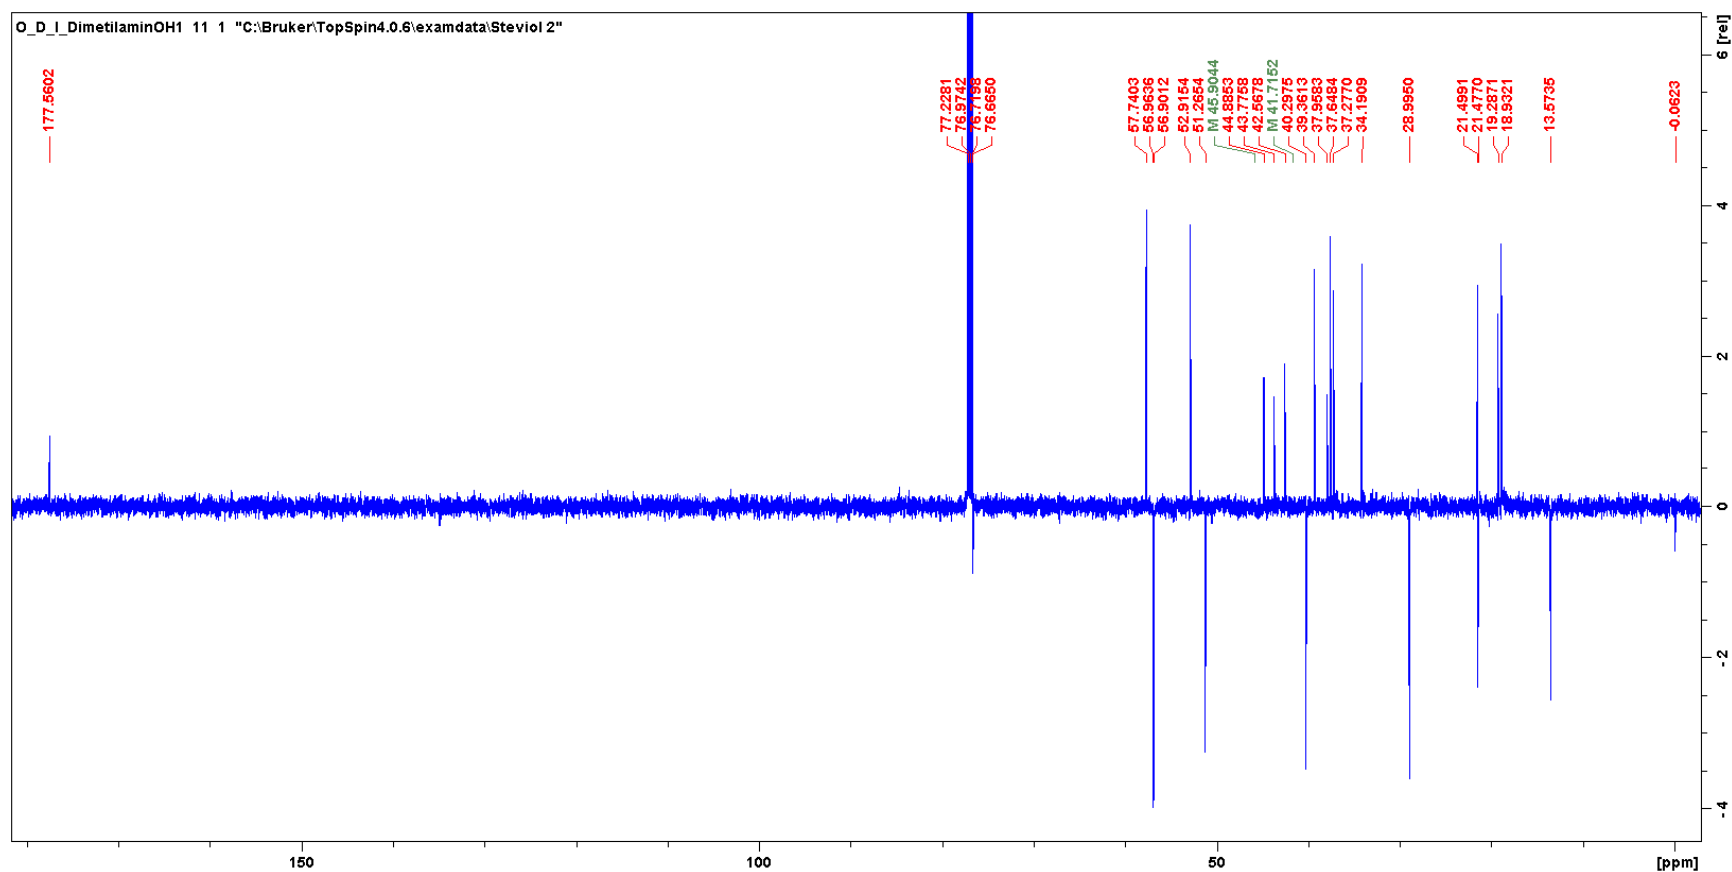

COSY of compound (4*R*,6*aS*,8*R*,9*S*,11*bS*)-Methyl 7-((dimethylamino)methyl)-8-hydroxy-4,9,11*b*-trimethyltetradecahydro-6*a*,9-methanocyclohepta[*a*]naphthalene-4-carboxylate (**22**)

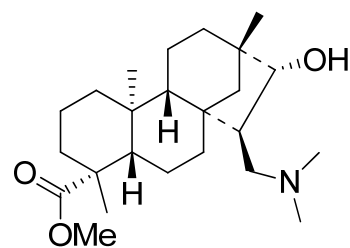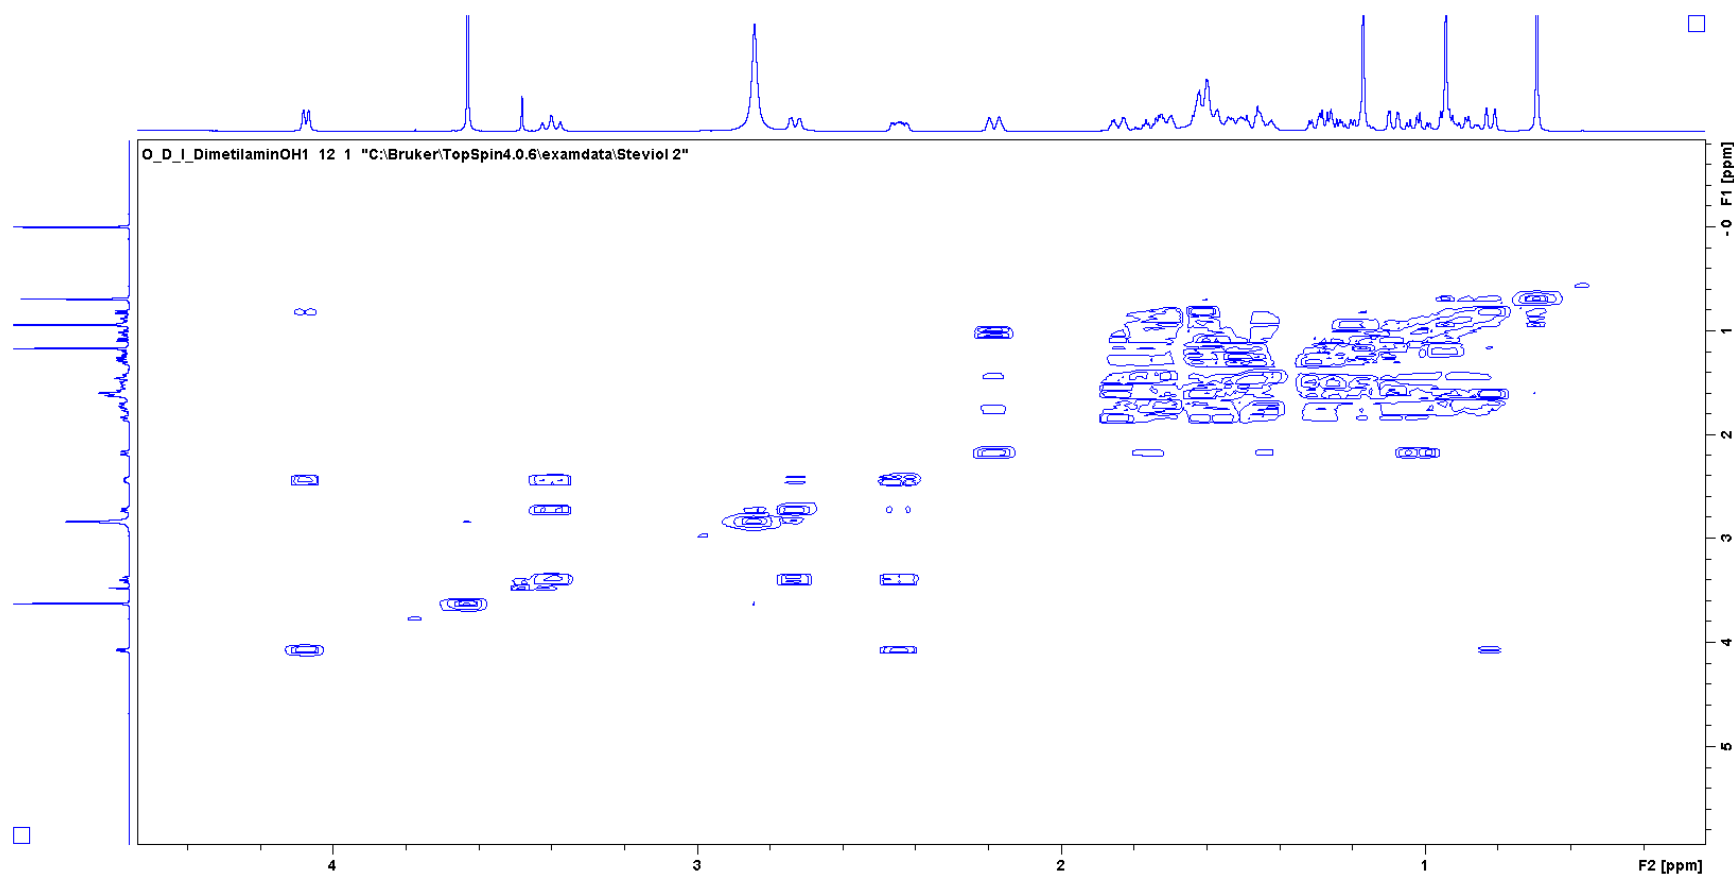

NOESY of compound (4*R*,6*aS*,8*R*,9*S*,11*bS*)-Methyl 7-((dimethylamino)methyl)-8-hydroxy-4,9,11*b*-trimethyltetradecahydro-6*a*,9-methanocyclohepta[*a*]naphthalene-4-carboxylate (**22**)

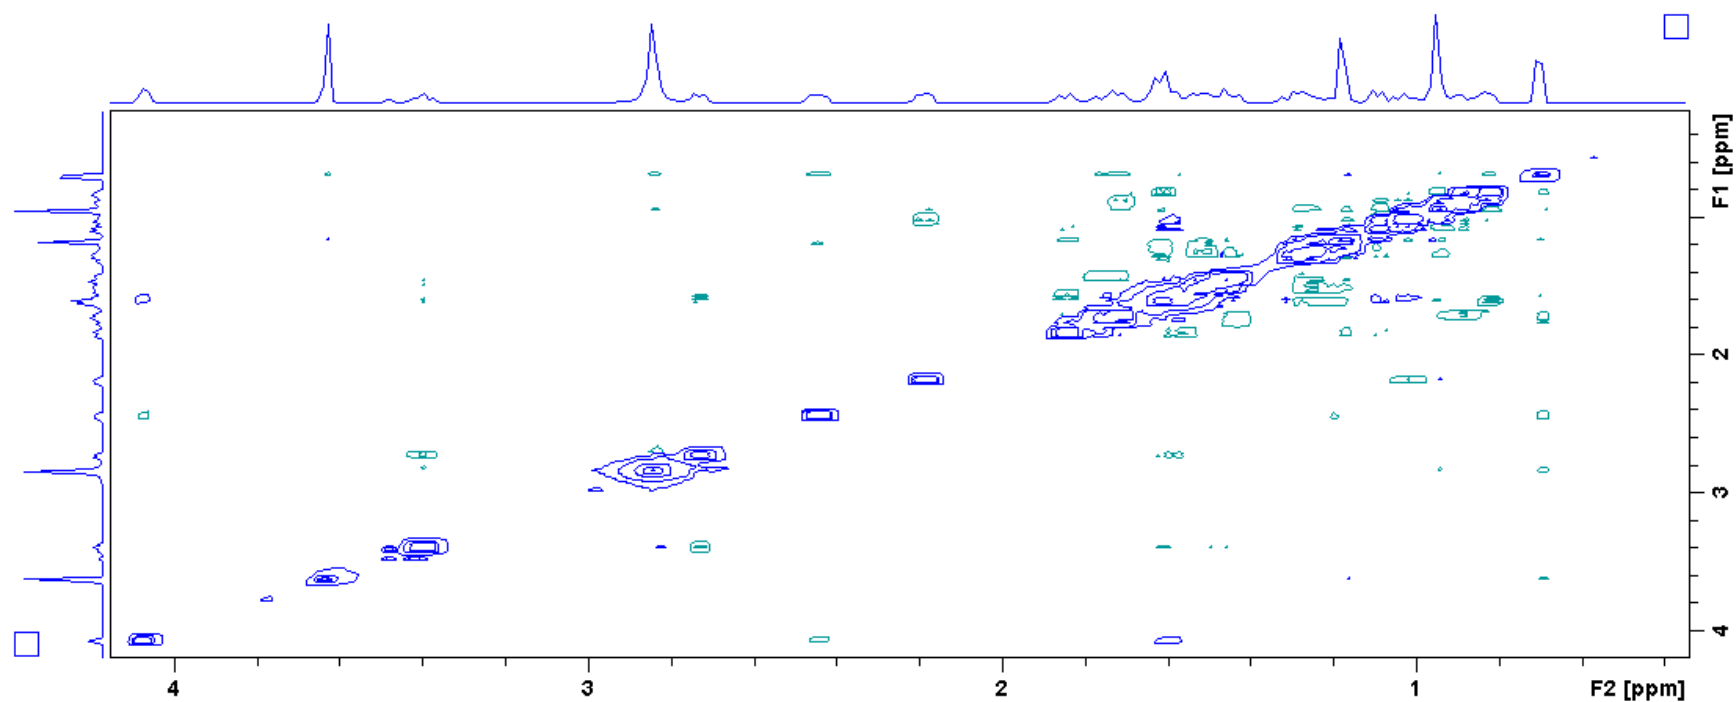

HSQC of compound (4*R*,6*aS*,8*R*,9*S*,11*bS*)-Methyl 7-((dimethylamino)methyl)-8-hydroxy-4,9,11*b*-trimethyltetradecahydro-6*a*,9-methanocyclohepta[*a*]naphthalene-4-carboxylate (**22**)



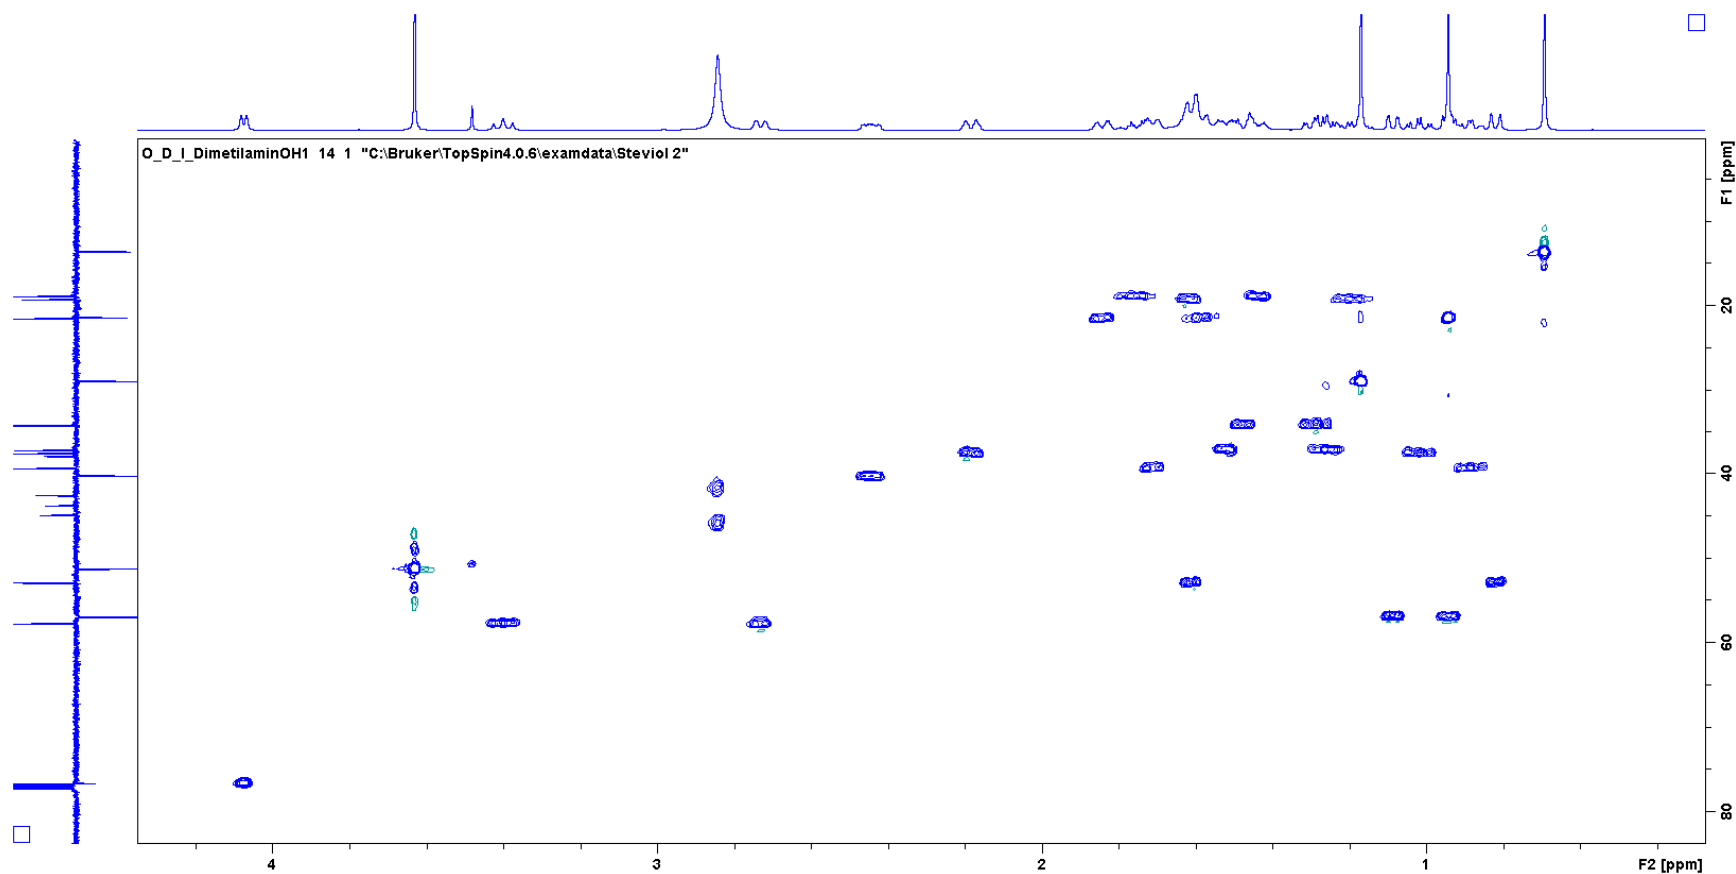

HMBC of compound (4*R*,6*aS*,8*R*,9*S*,11*bS*)-Methyl 7-((dimethylamino)methyl)-8-hydroxy-4,9,11*b*-trimethyltetradecahydro-6*a*,9-methanocyclohepta[*a*]naphthalene-4-carboxylate (**22**)

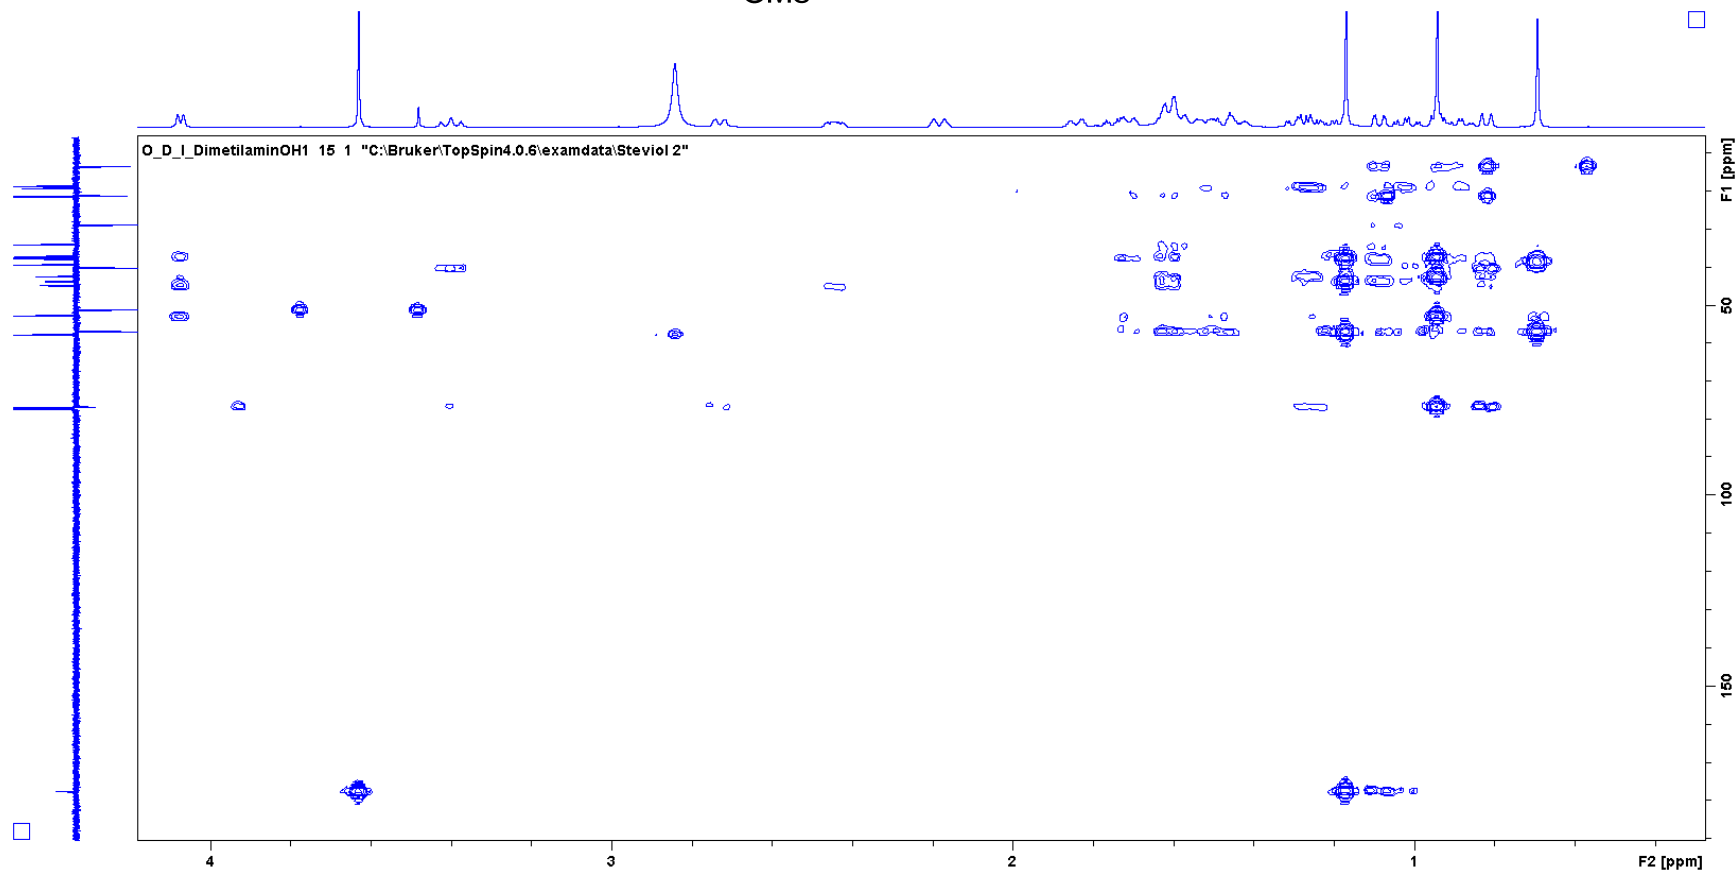

$^1\text{H}$ -NMR of compound (4*R*,6*aS*,9*S*,11*bS*)-Methyl 7-((diethylamino)methyl)-8-hydroxy-4,9,11*b*-trimethyltetradecahydro-6*a*,9-methanocyclohepta[*a*]naphthalene-4-carboxylate (**23a**)

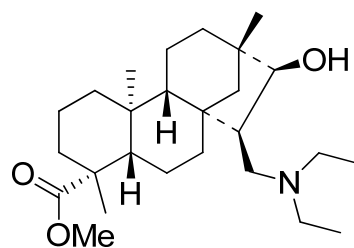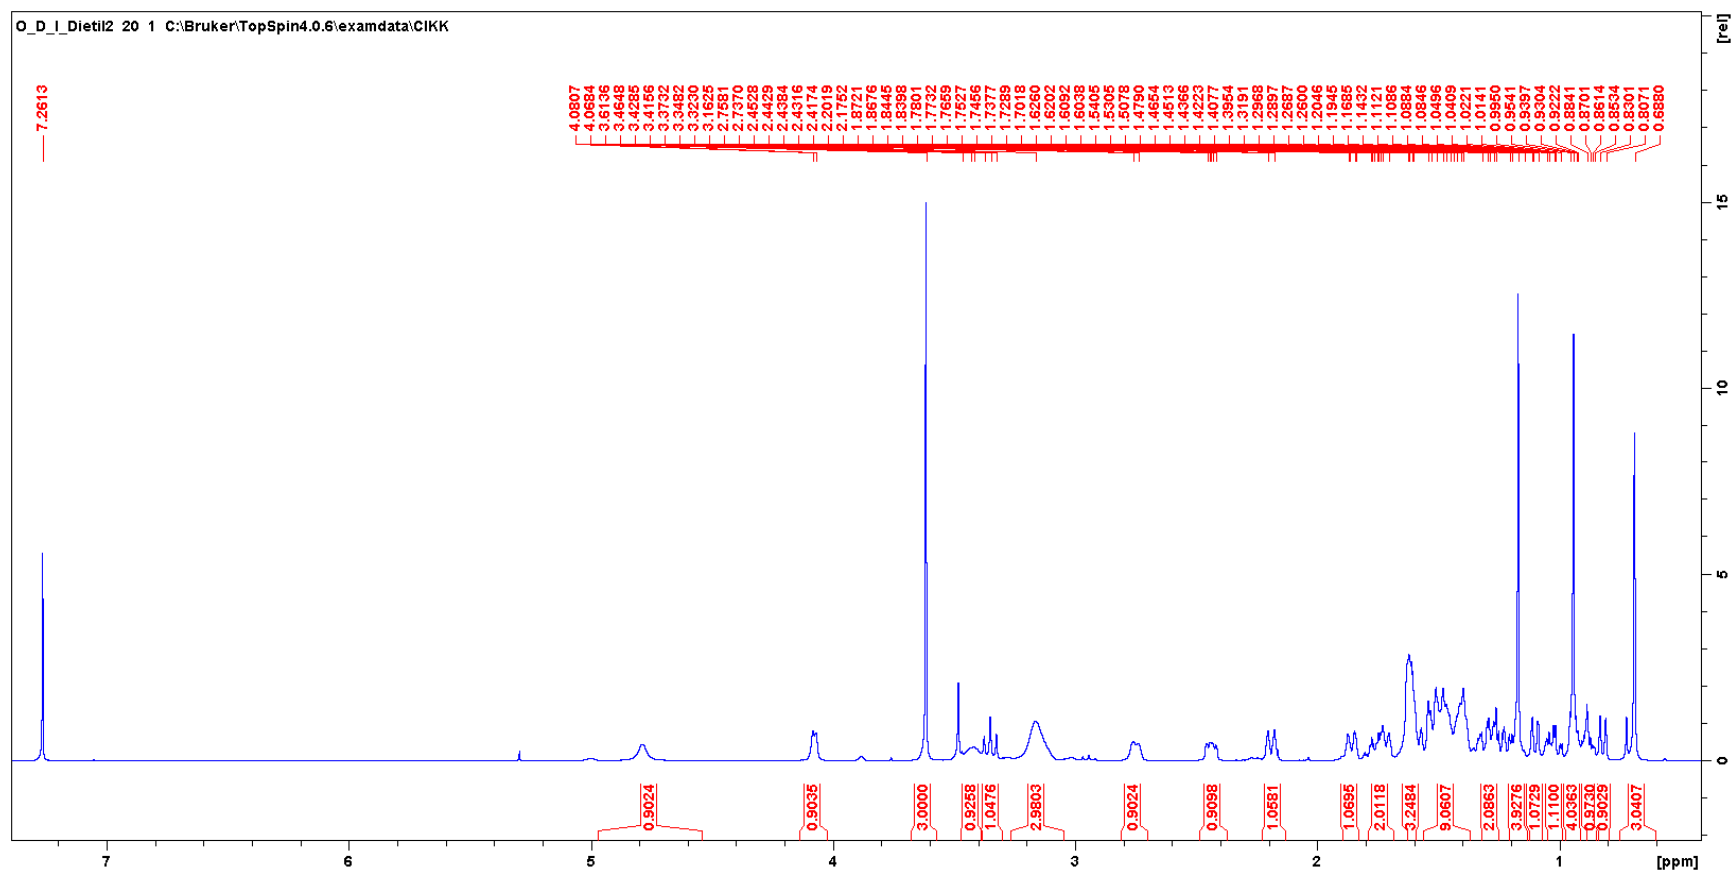

$^{13}\text{C}$ -NMR of compound (4*R*,6*aS*,9*S*,11*bS*)-Methyl 7-((diethylamino)methyl)-8-hydroxy-4,9,11*b*-trimethyltetradecahydro-6*a*,9-methanocyclohepta[*a*]naphthalene-4-carboxylate (**23a**)

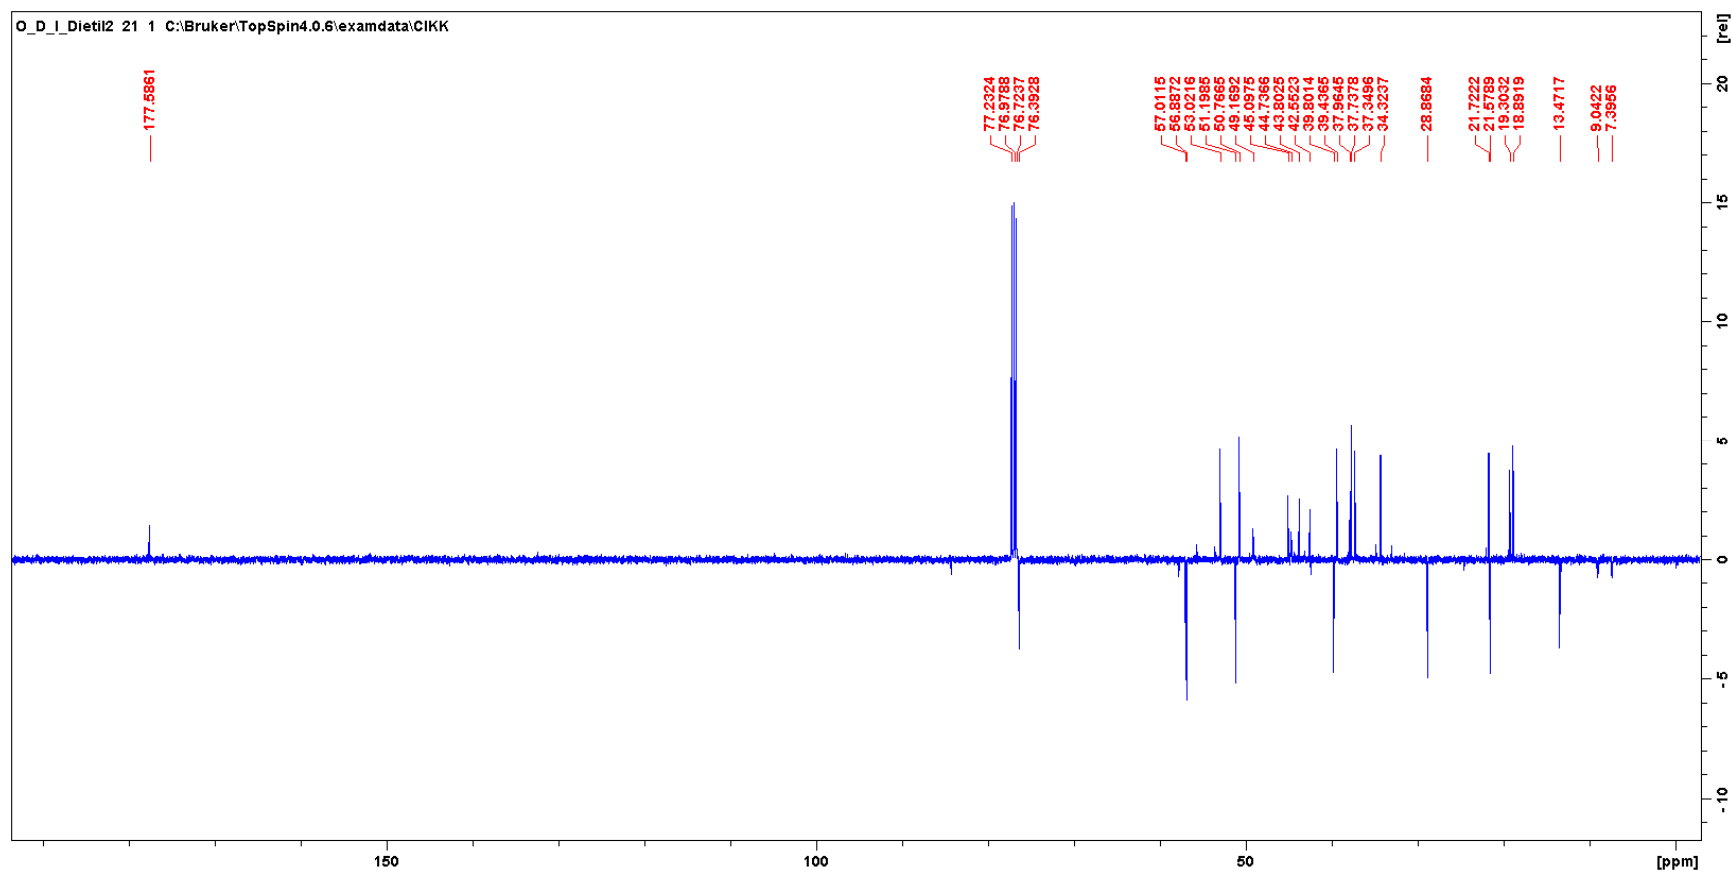

COSY of compound (4R,6aS,9S,11bS)-Methyl 7-((diethylamino)methyl)-8-hydroxy-4,9,11b-trimethyltetradecahydro-6a,9-methanocyclohepta[a]naphthalene-4-carboxylate (**23a**)

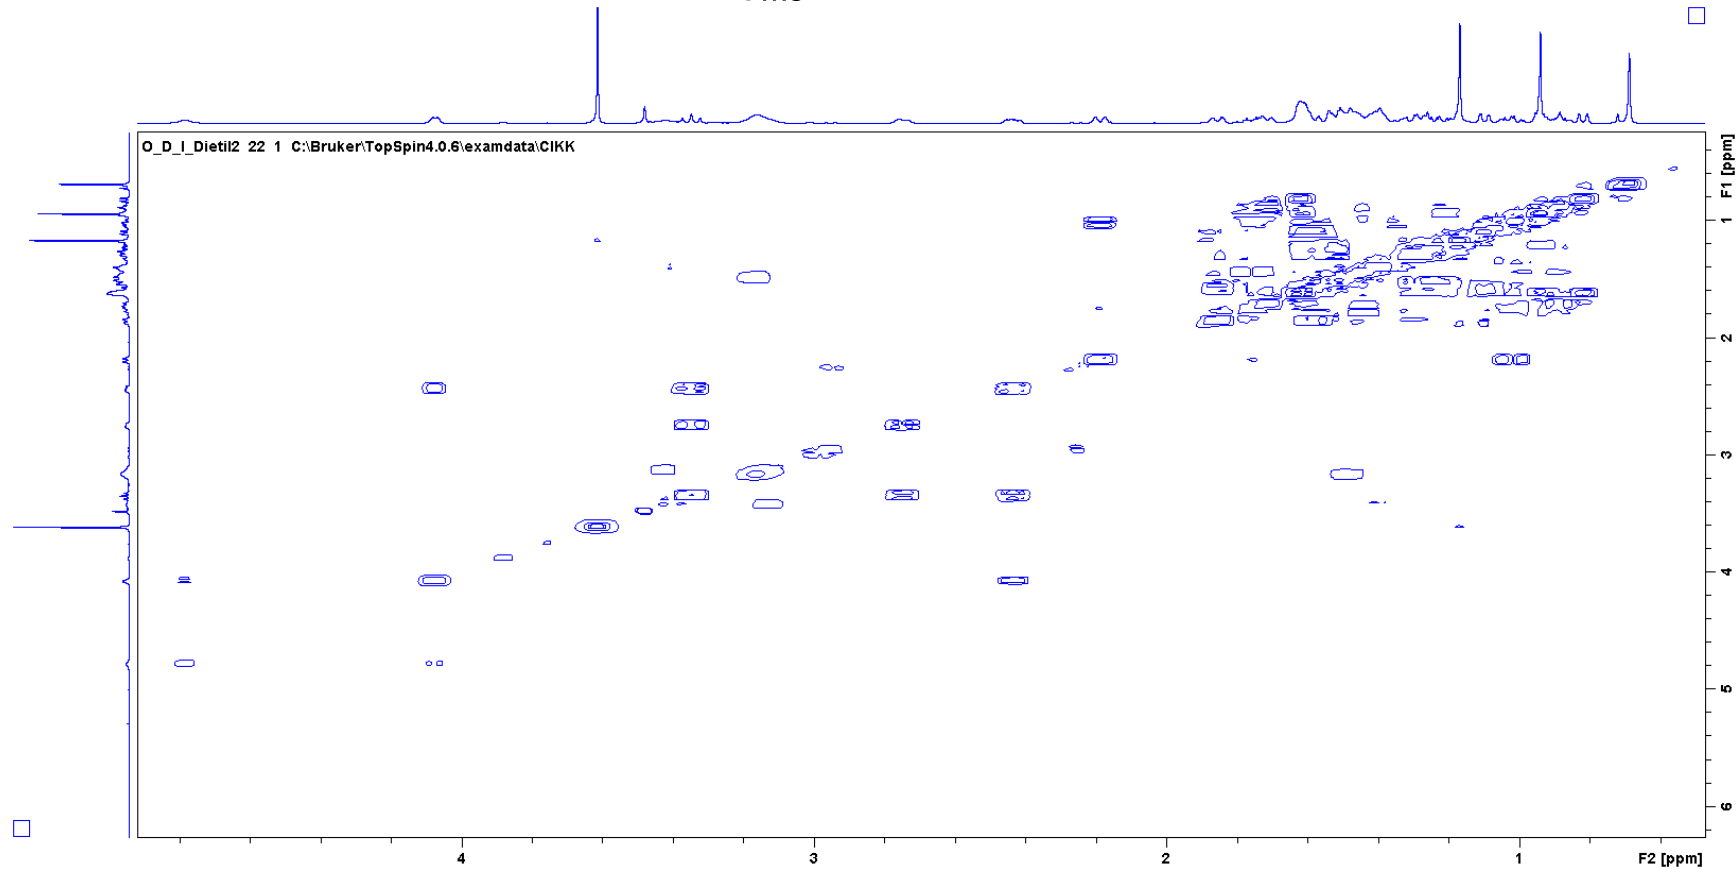

HSQC of compound (4*R*,6*aS*,9*S*,11*bS*)-Methyl 7-((diethylamino)methyl)-8-hydroxy-4,9,11*b*-trimethyltetradecahydro-6*a*,9-methanocyclohepta[*a*]naphthalene-4-carboxylate (**23a**)

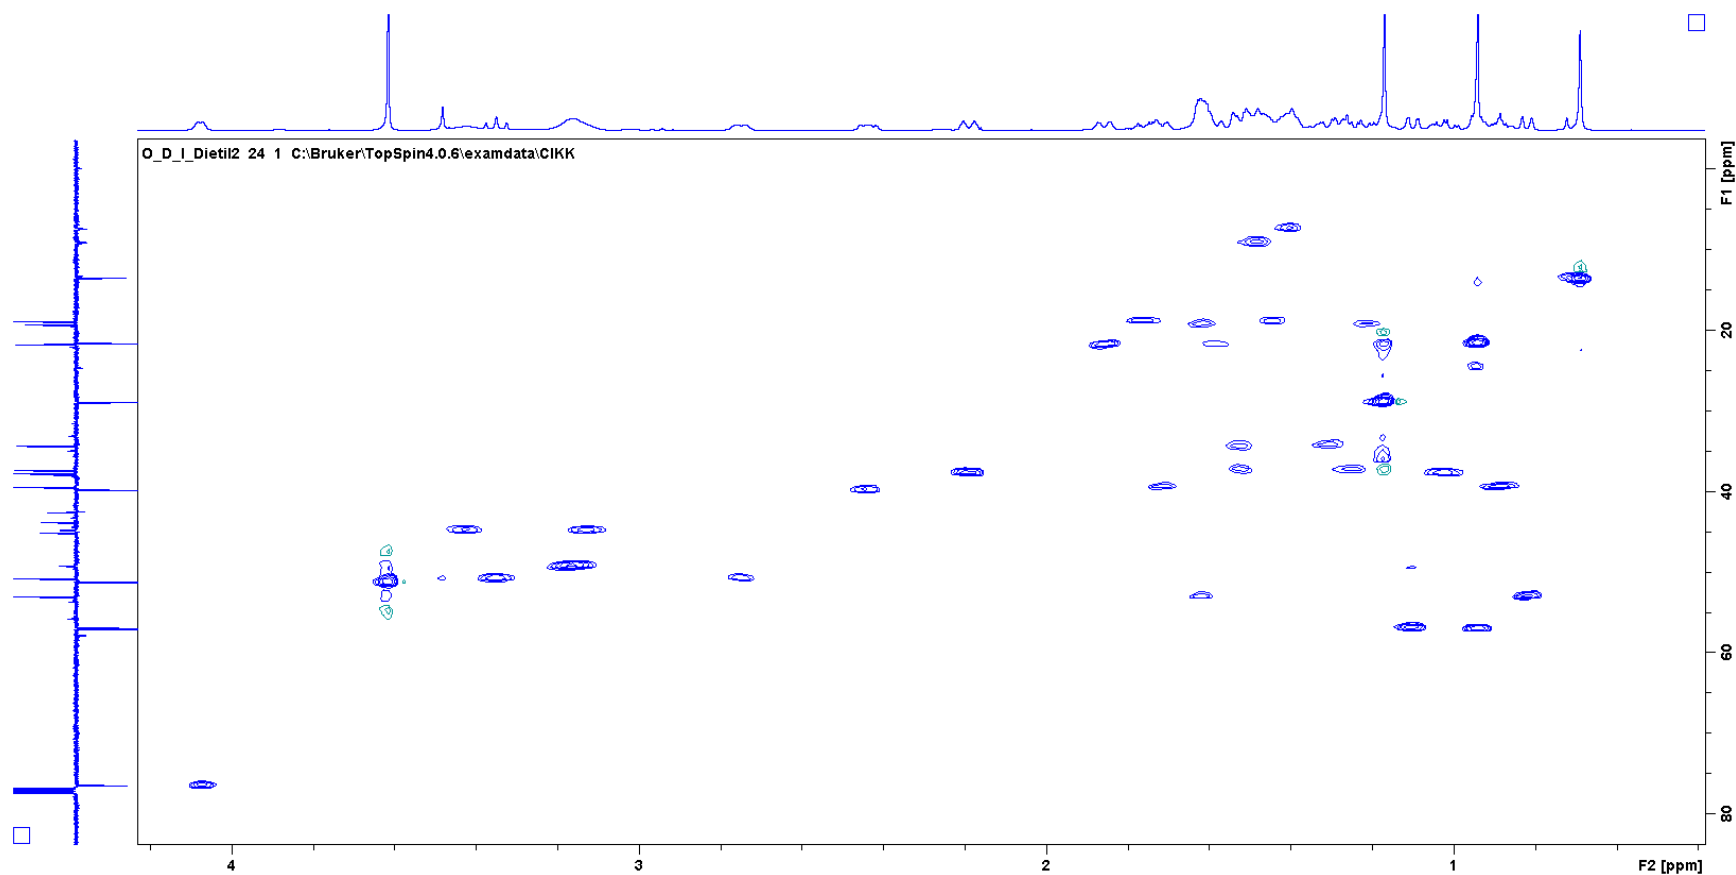

HMBC of compound (4*R*,6*aS*,9*S*,11*bS*)-Methyl 7-((diethylamino)methyl)-8-hydroxy-4,9,11*b*-trimethyltetradecahydro-6*a*,9-methanocyclohepta[*a*]naphthalene-4-carboxylate (**23a**)

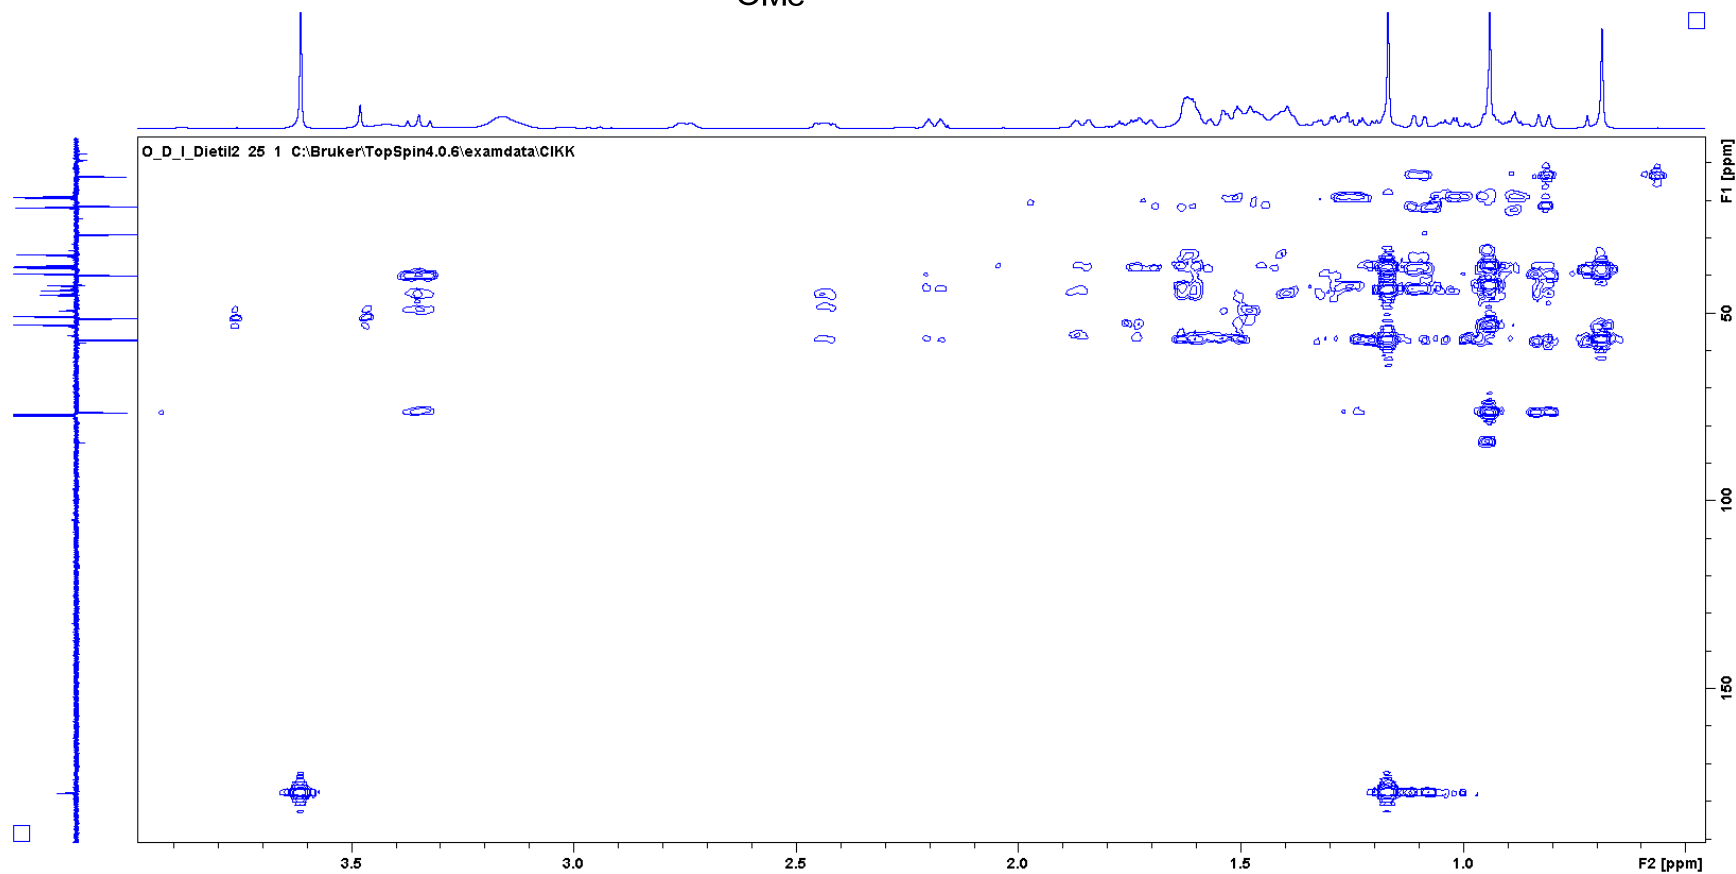

$^1\text{H}$ -NMR of compound (4*R*,6*aS*,8*R*,9*S*,11*bS*)-Methyl 7-((diethylamino)methyl)-8-hydroxy-4,9,11*b*-trimethyltetradecahydro-6*a*,9-methanocyclohepta[*a*]naphthalene-4-carboxylate (**23b**)





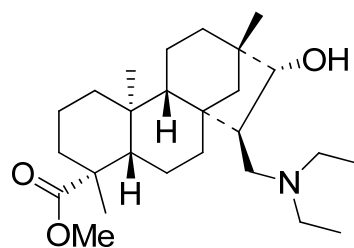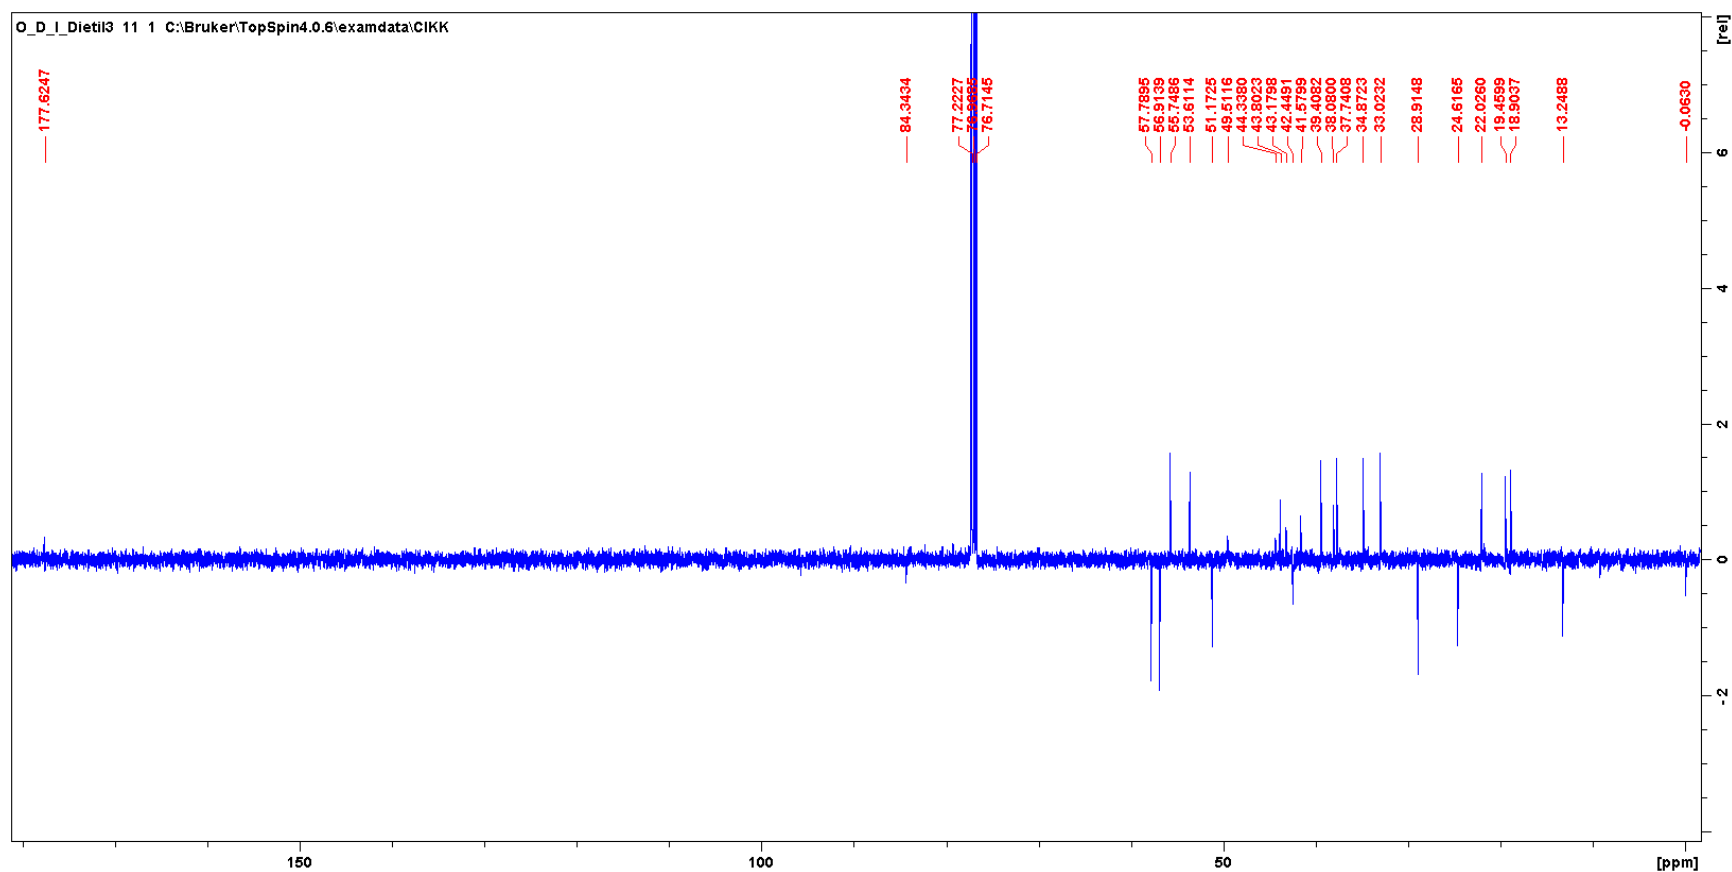

COSY of compound (4*R*,6*aS*,8*R*,9*S*,11*bS*)-Methyl 7-((diethylamino)methyl)-8-hydroxy-4,9,11*b*-trimethyltetradecahydro-6*a*,9-methanocyclohepta[*a*]naphthalene-4-carboxylate (**23b**)

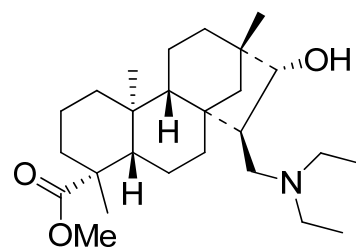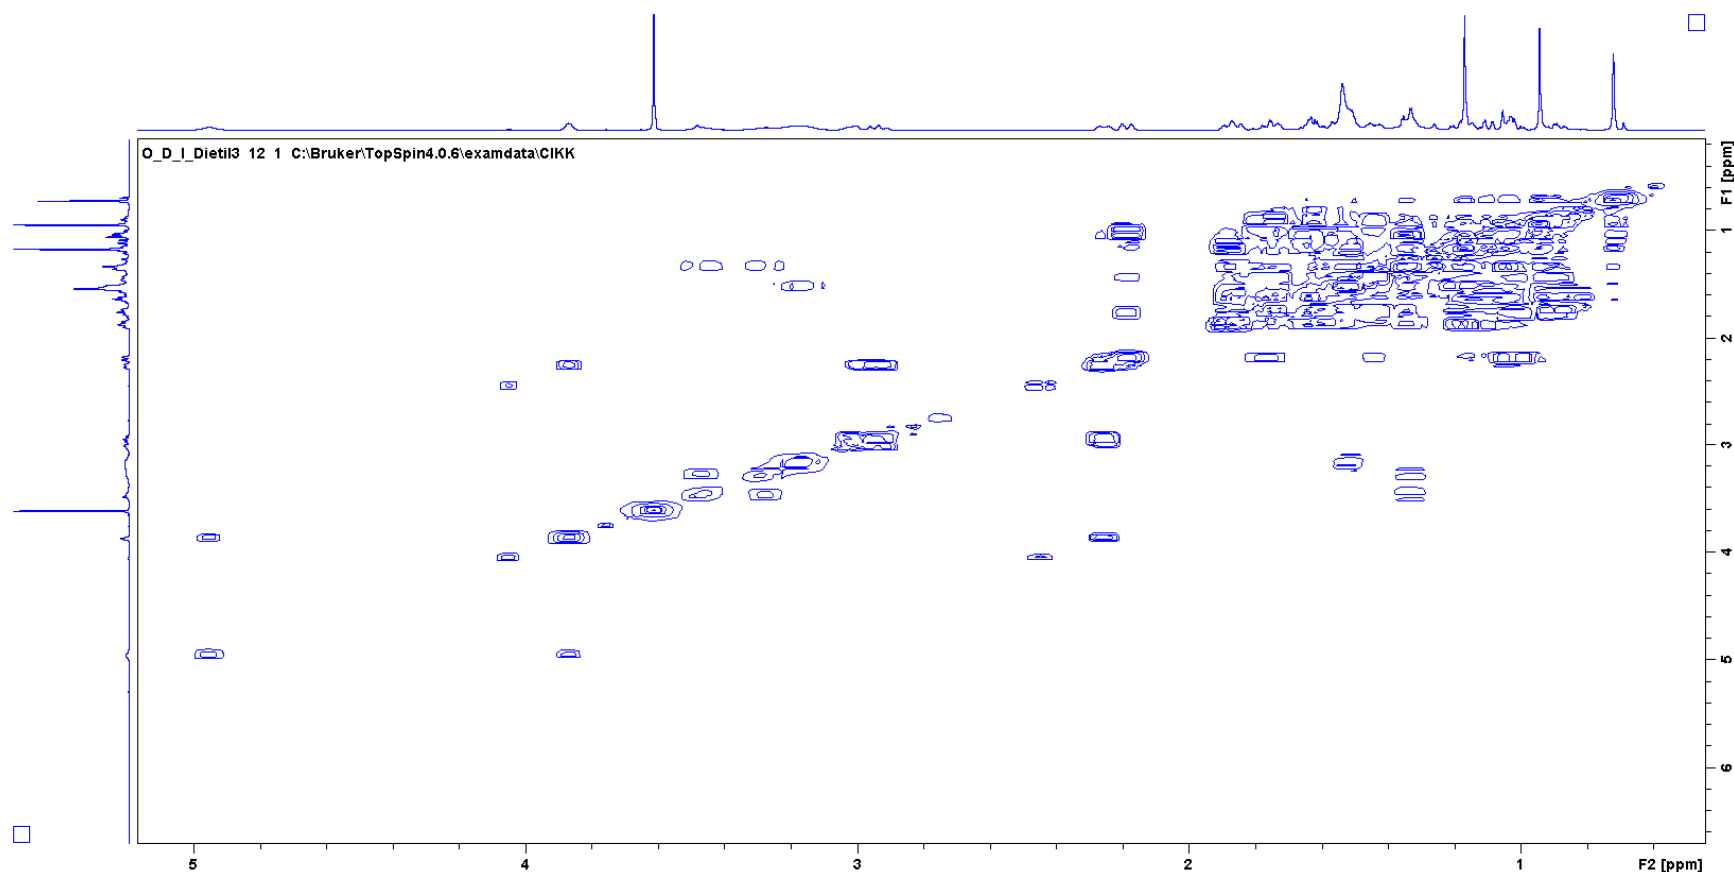

HSQC of compound (4*R*,6*aS*,8*R*,9*S*,11*bS*)-Methyl 7-((diethylamino)methyl)-8-hydroxy-4,9,11*b*-trimethyltetradecahydro-6*a*,9-methanocyclohepta[*a*]naphthalene-4-carboxylate (**23b**)

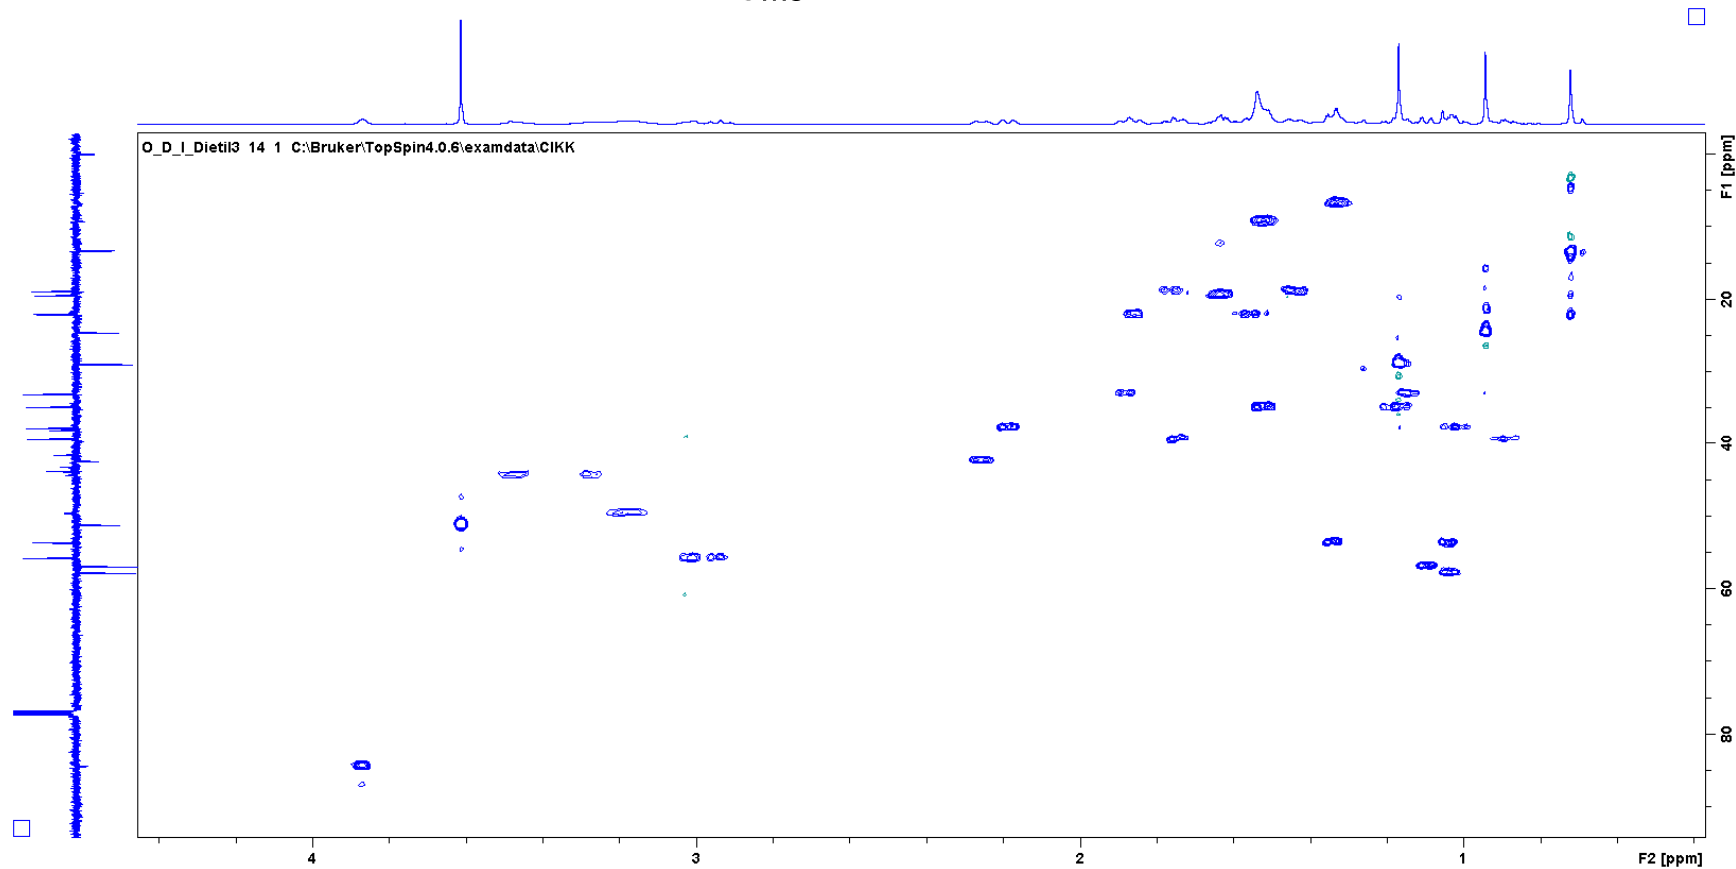

HMBC of compound (4*R*,6*aS*,8*R*,9*S*,11*bS*)-Methyl 7-((diethylamino)methyl)-8-hydroxy-4,9,11*b*-trimethyltetradecahydro-6*a*,9-methanocyclohepta[*a*]naphthalene-4-carboxylate (**23b**)

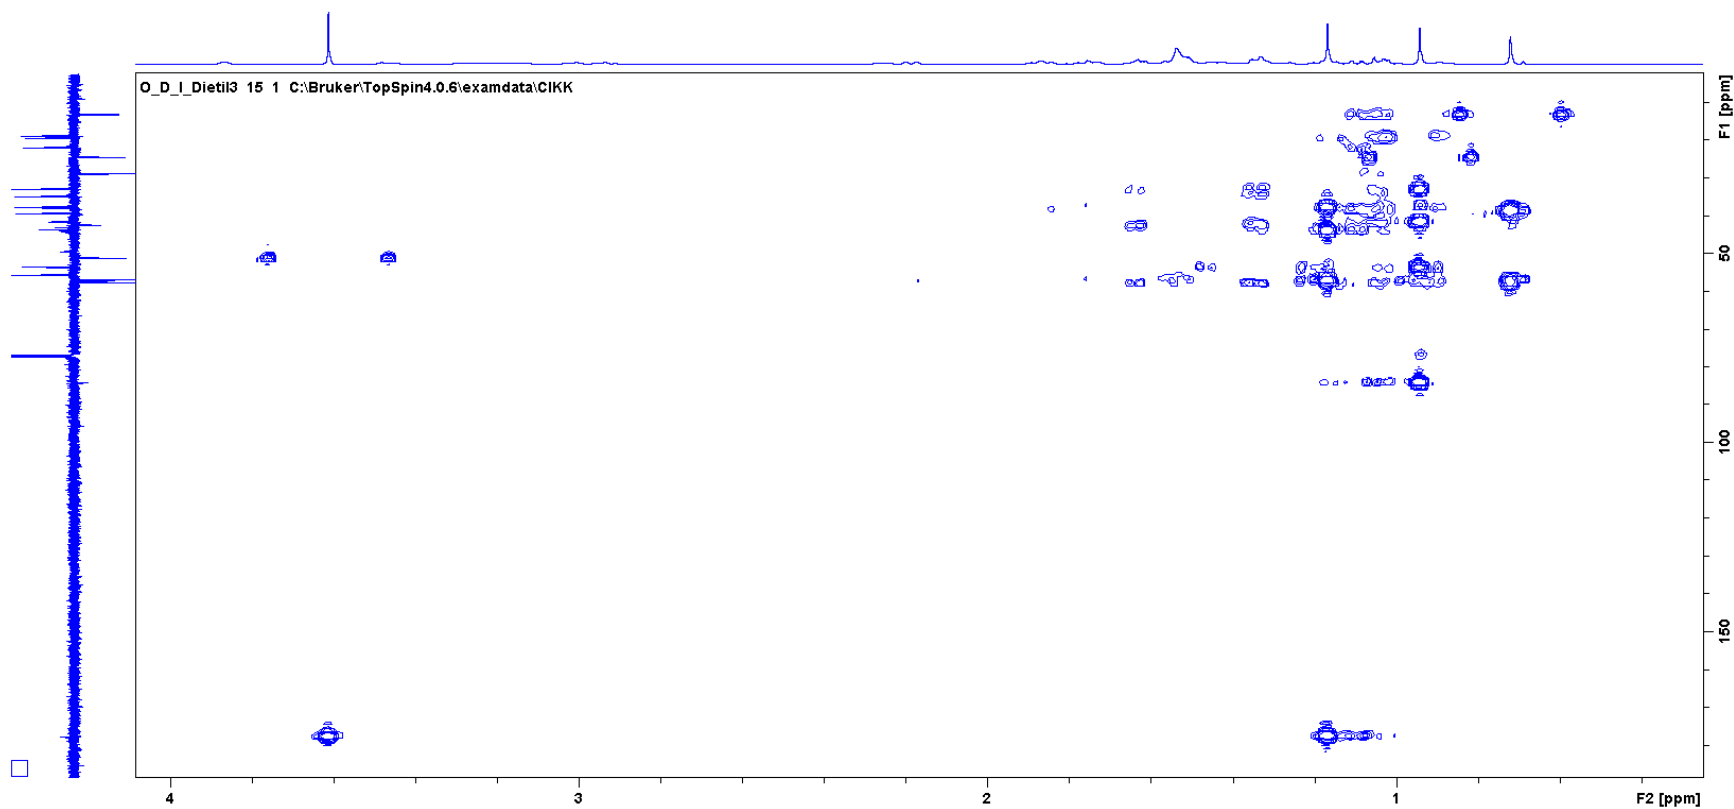

$^1\text{H}$ -NMR of compound (4*R*,6*aS*,9*S*,11*bS*)-Methyl 8-hydroxy-4,9,11*b*-trimethyl-7-((methylamino)methyl)tetradecahydro-6*a*,9-methanocyclohepta[*a*]naphthalene-4-carboxylate (**24**)

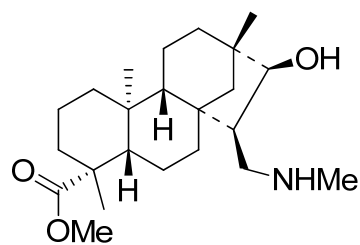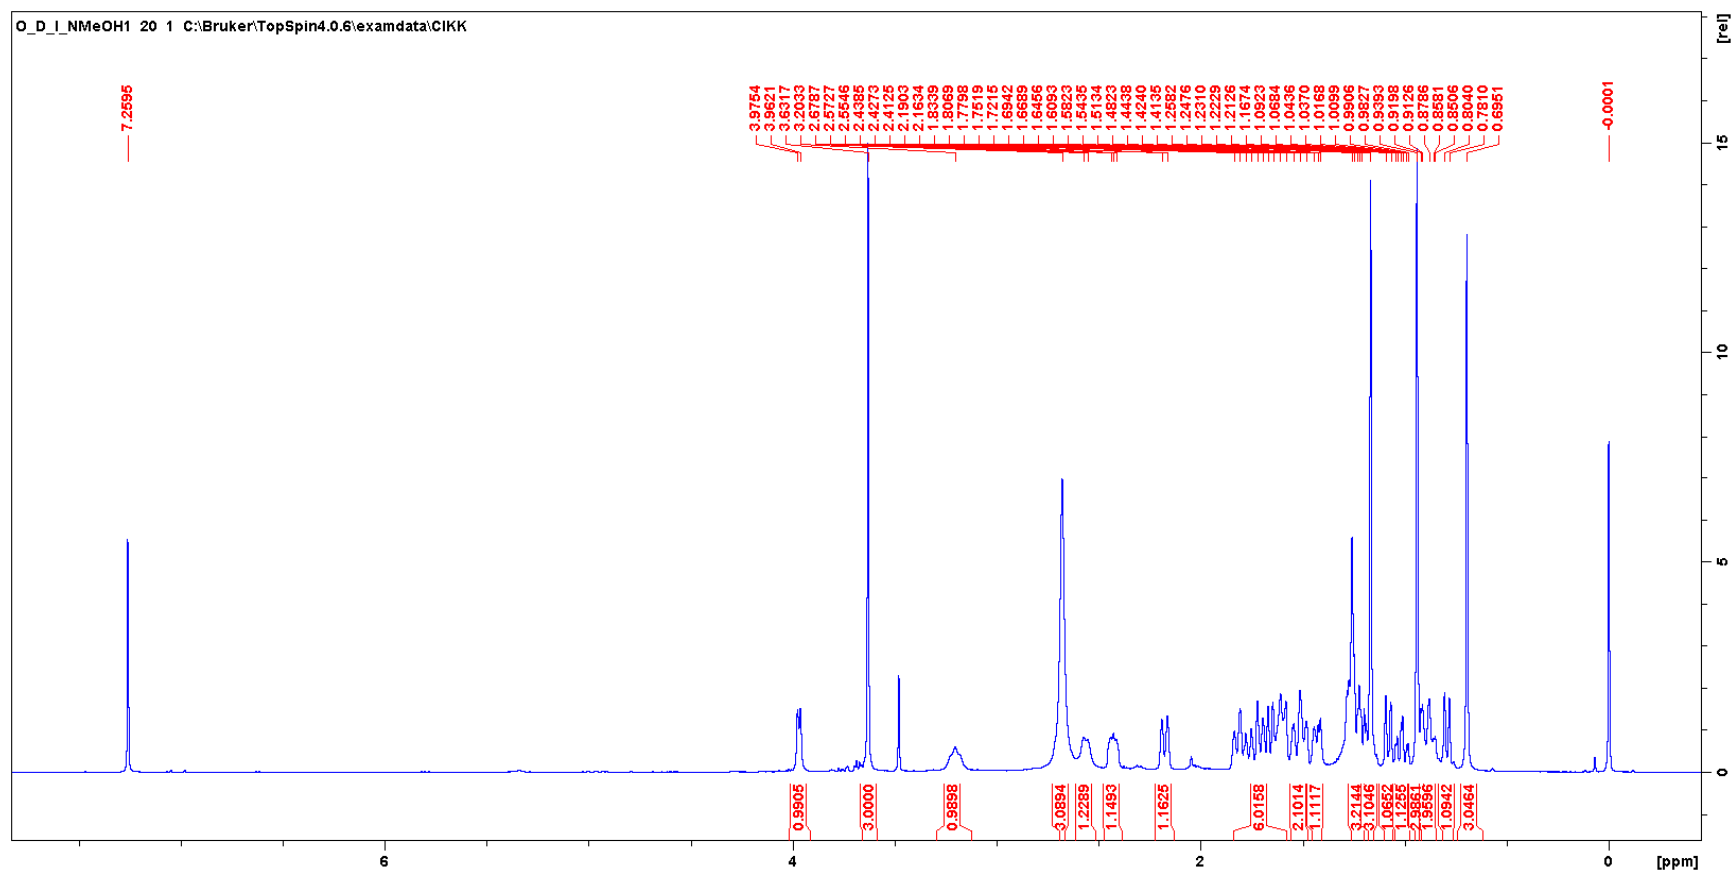

$^{13}\text{C}$ -NMR of compound (4R,6aS,9S,11bS)-Methyl 8-hydroxy-4,9,11b-trimethyl-7-((methylamino)methyl)tetradecahydro-6a,9-methanocyclohepta[a]naphthalene-4-carboxylate (**24**)

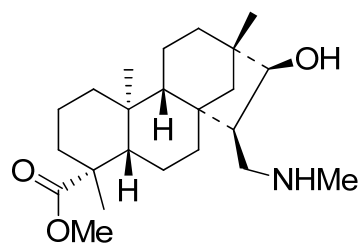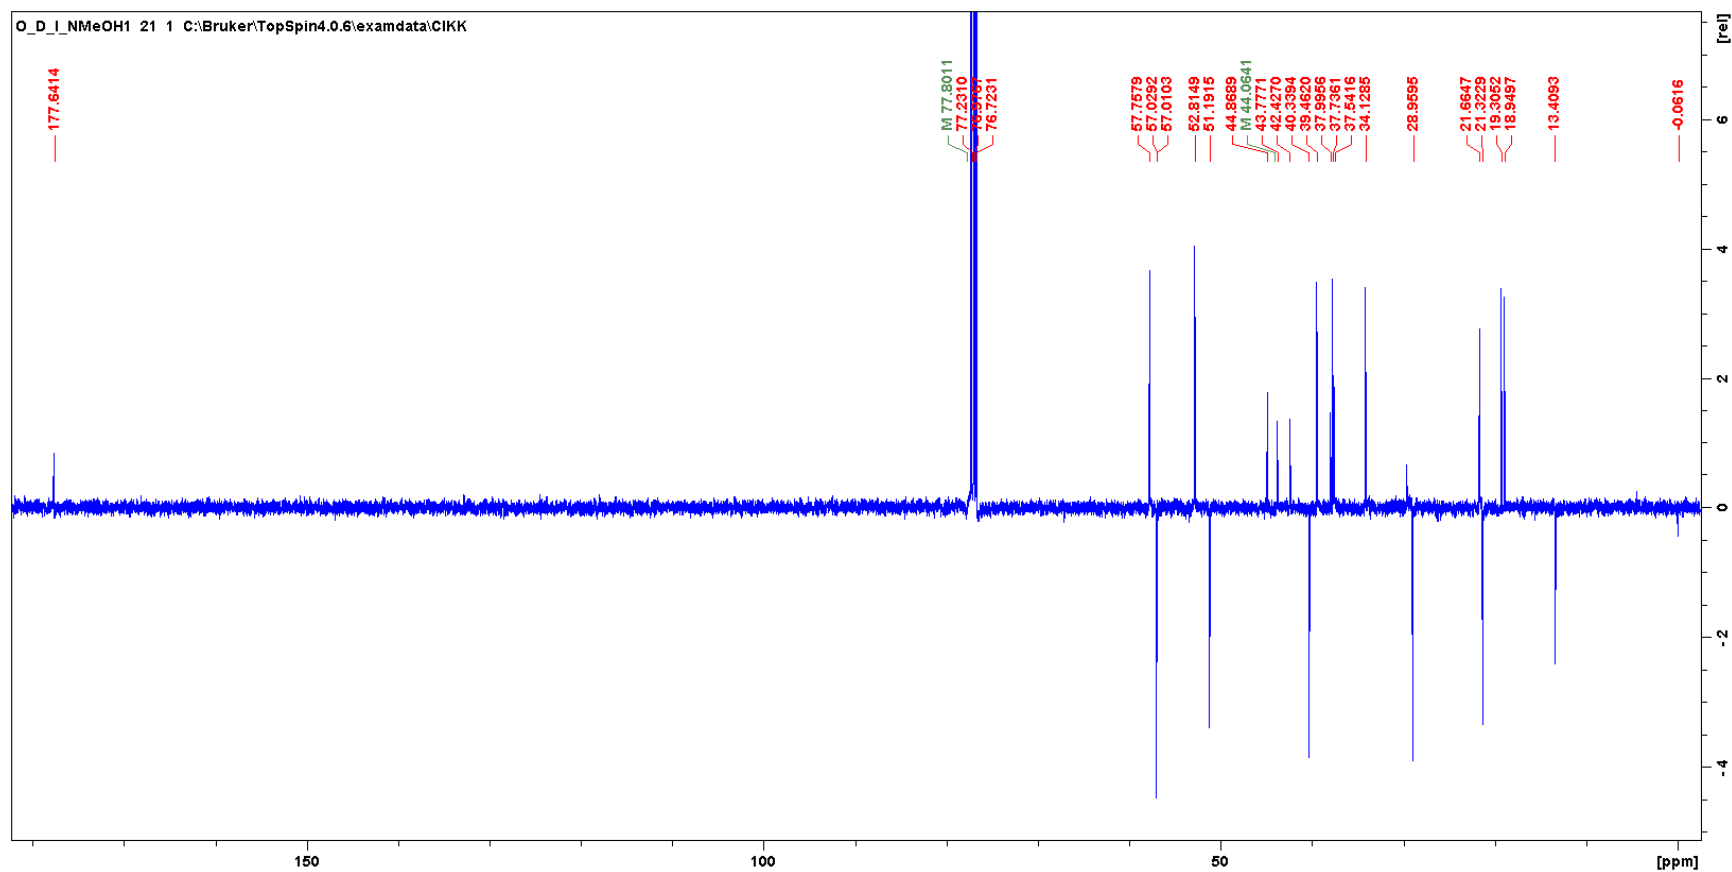

COSY of compound (4*R*,6*aS*,9*S*,11*bS*)-Methyl 8-hydroxy-4,9,11*b*-trimethyl-7-((methylamino)methyl)tetradecahydro-6*a*,9-methanocyclohepta[*a*]naphthalene-4-carboxylate (**24**)

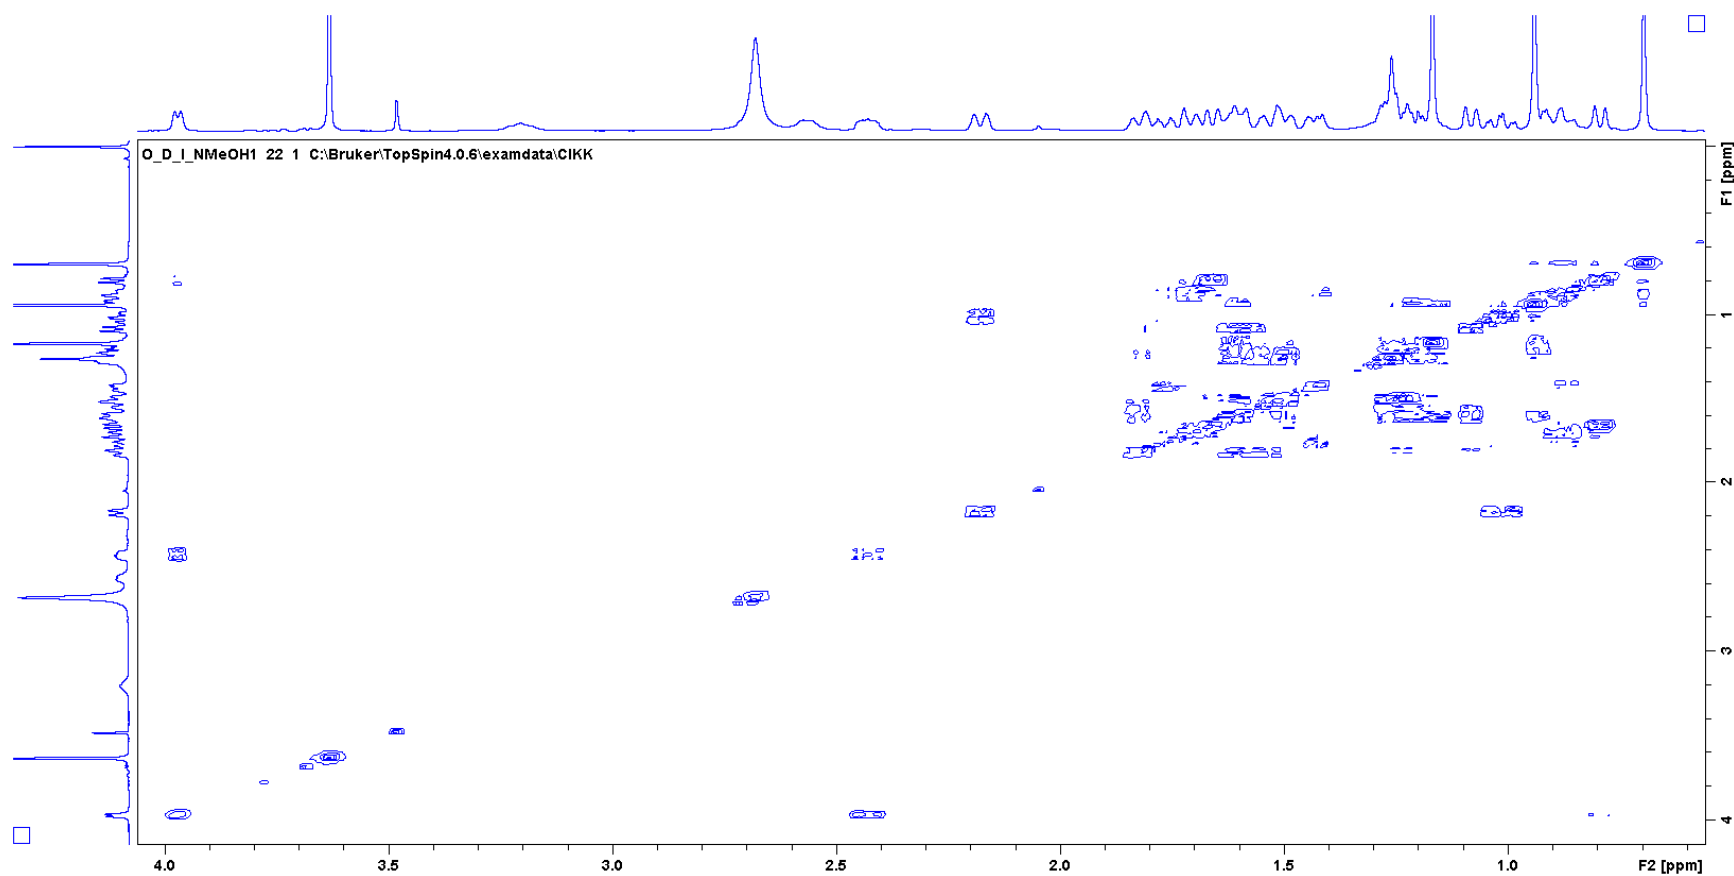

NOESY of compound (4*R*,6*aS*,9*S*,11*bS*)-Methyl 8-hydroxy-4,9,11*b*-trimethyl-7-((methylamino)methyl)tetradecahydro-6*a*,9-methanocyclohepta[*a*]naphthalene-4-carboxylate (**24**)

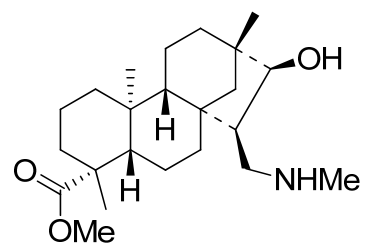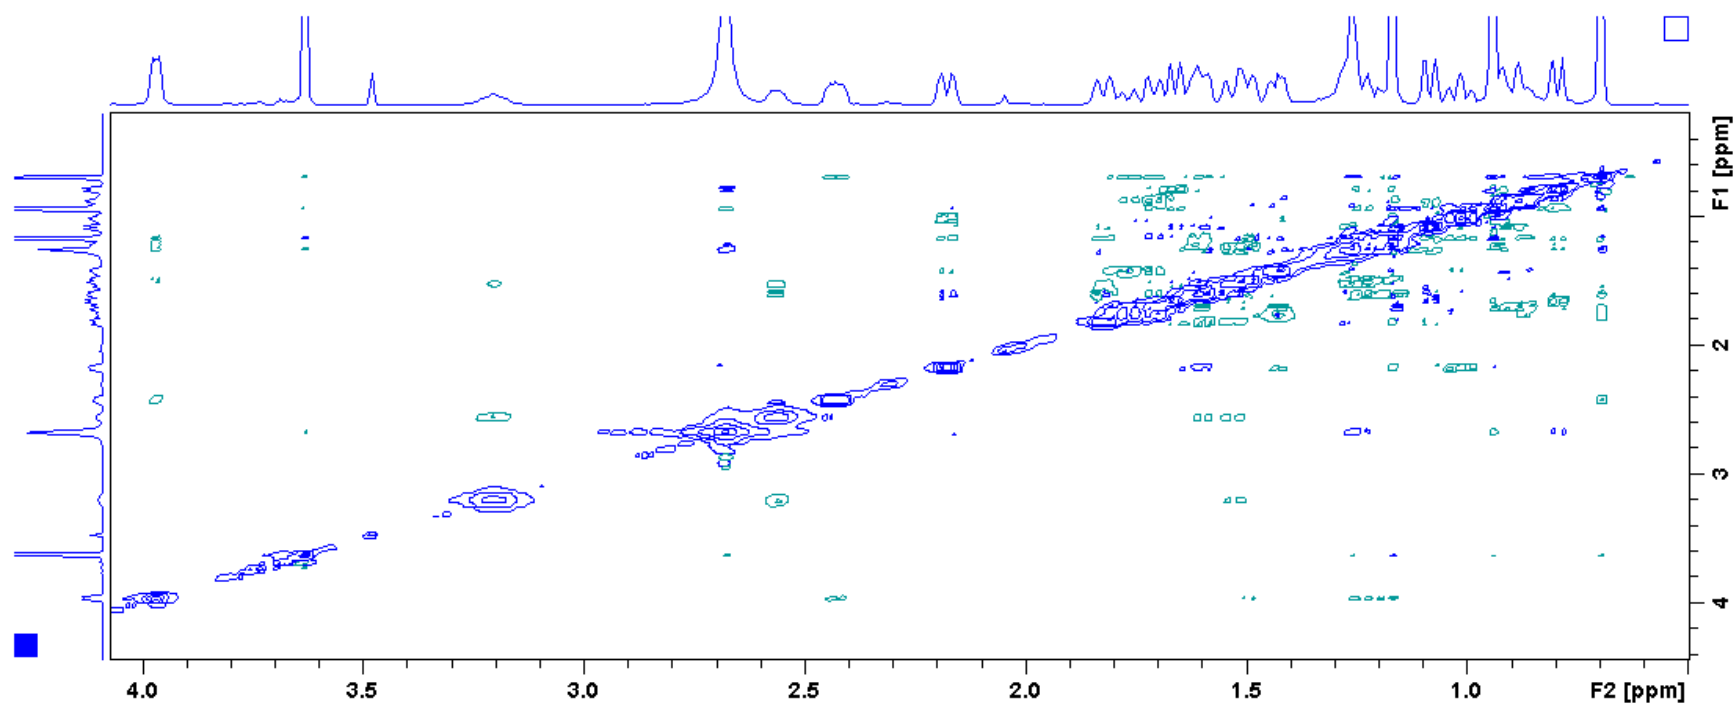

HSQC of compound (4*R*,6*aS*,9*S*,11*bS*)-Methyl 8-hydroxy-4,9,11*b*-trimethyl-7-((methylamino)methyl)tetradecahydro-6*a*,9-methanocyclohepta[*a*]naphthalene-4-carboxylate (**24**)



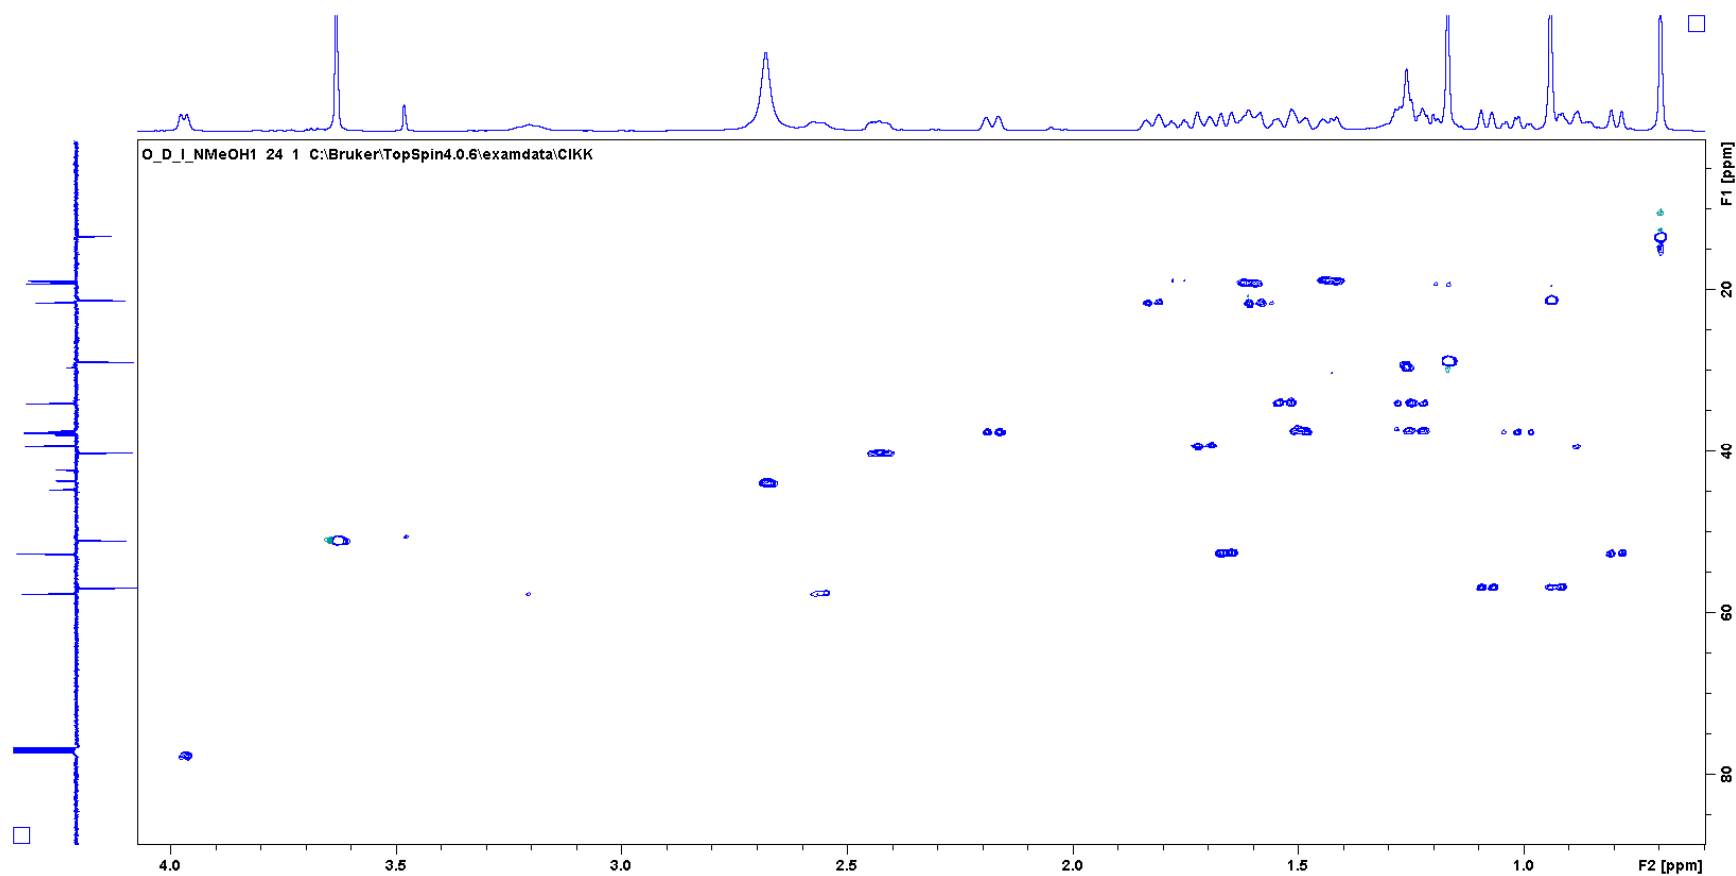

HMBC of compound (4R,6aS,9S,11bS)-Methyl 8-hydroxy-4,9,11b-trimethyl-7-((methylamino)methyl)tetradecahydro-6a,9-methanocyclohepta[a]naphthalene-4-carboxylate (**24**)

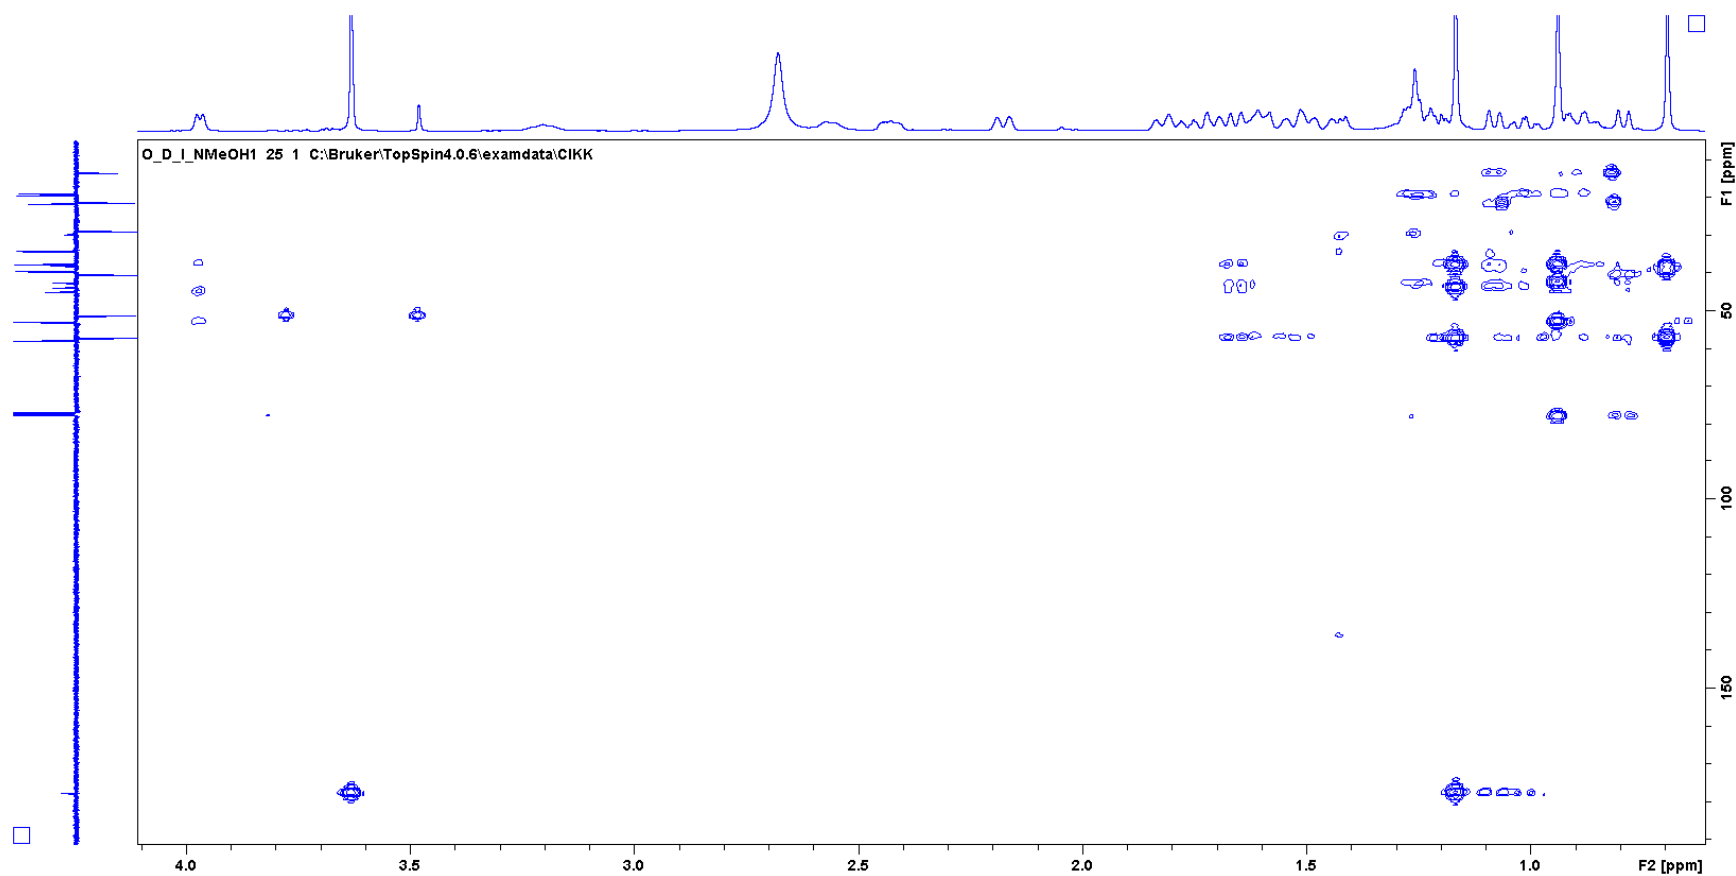

$^1\text{H}$ -NMR of compound (4*R*,6*aS*,8*R*,9*S*,11*bS*)-Methyl 8-hydroxy-4,9,11*b*-trimethyl-7-((3-phenylthioureido)methyl)tetradecahydro-6*a*,9-methanocyclohepta[*a*]naphthalene-4-carboxylate (**25**)

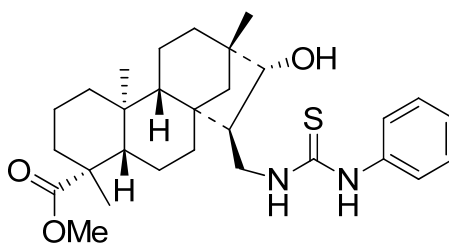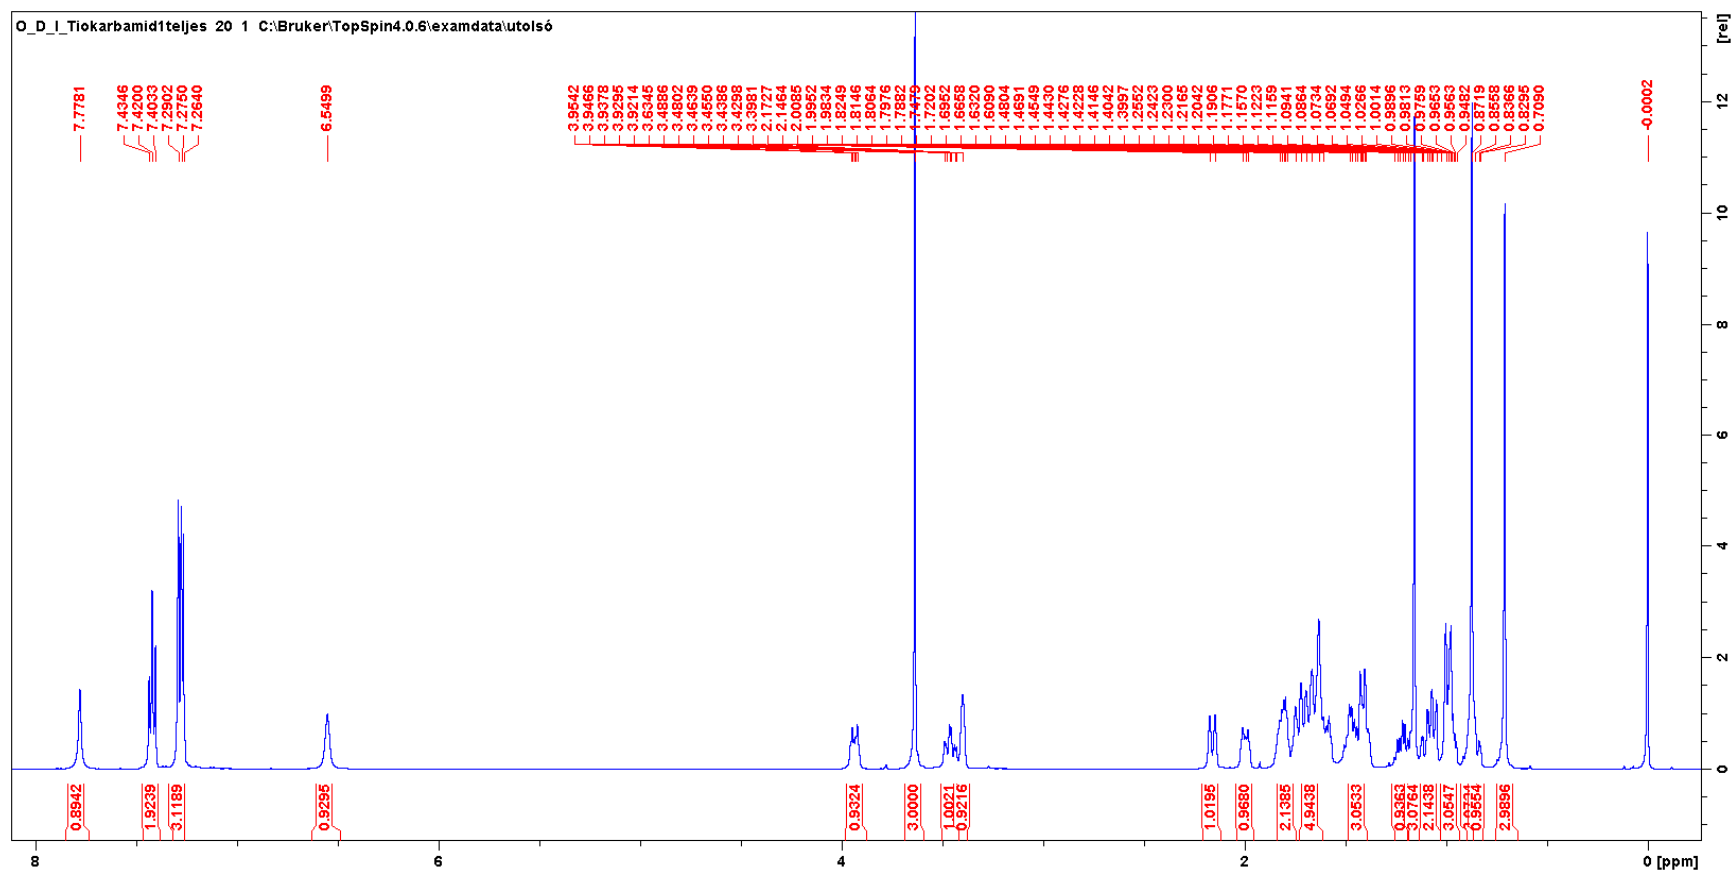

$^{13}\text{C}$ -NMR of compound (4R,6aS,8R,9S,11bS)-Methyl 8-hydroxy-4,9,11b-trimethyl-7-((3-phenylthioureido)methyl)tetradecahydro-6a,9-methanocyclohepta[a]naphthalene-4-carboxylate (**25**)

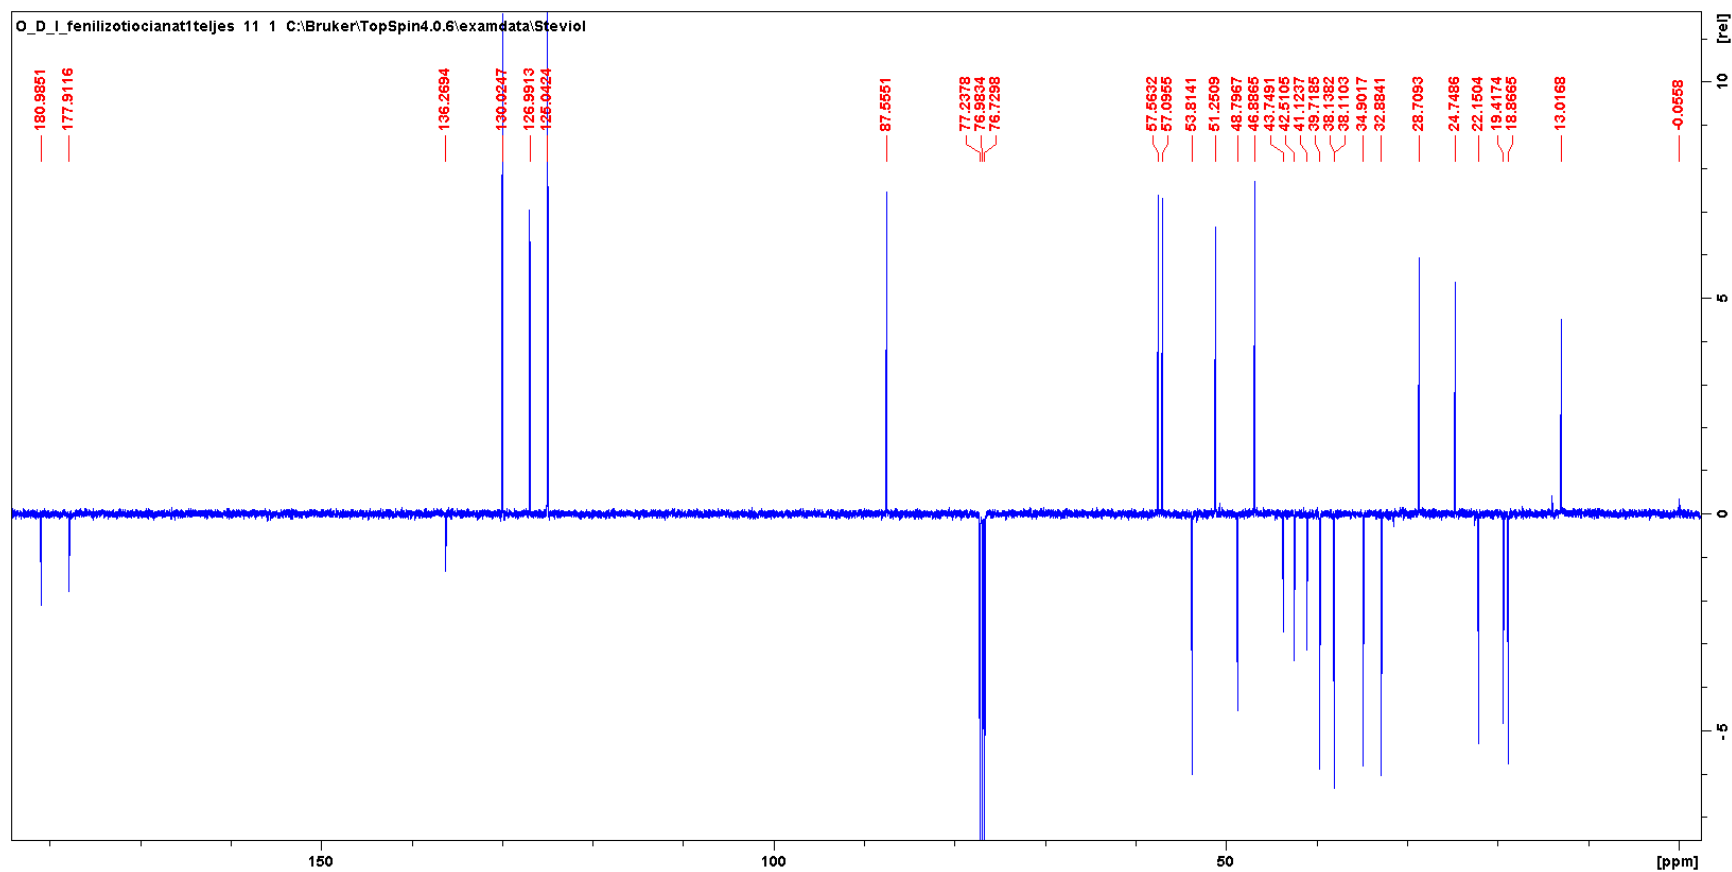

COSY of compound (4*R*,6*aS*,8*R*,9*S*,11*bS*)-Methyl 8-hydroxy-4,9,11*b*-trimethyl-7-((3-phenylthioureido)methyl)tetradecahydro-6*a*,9-methanocyclohepta[*a*]naphthalene-4-carboxylate (**25**)

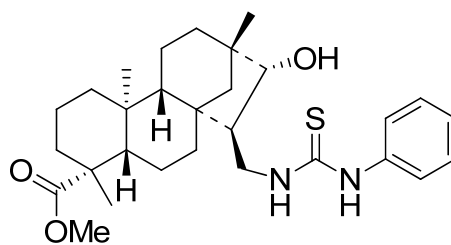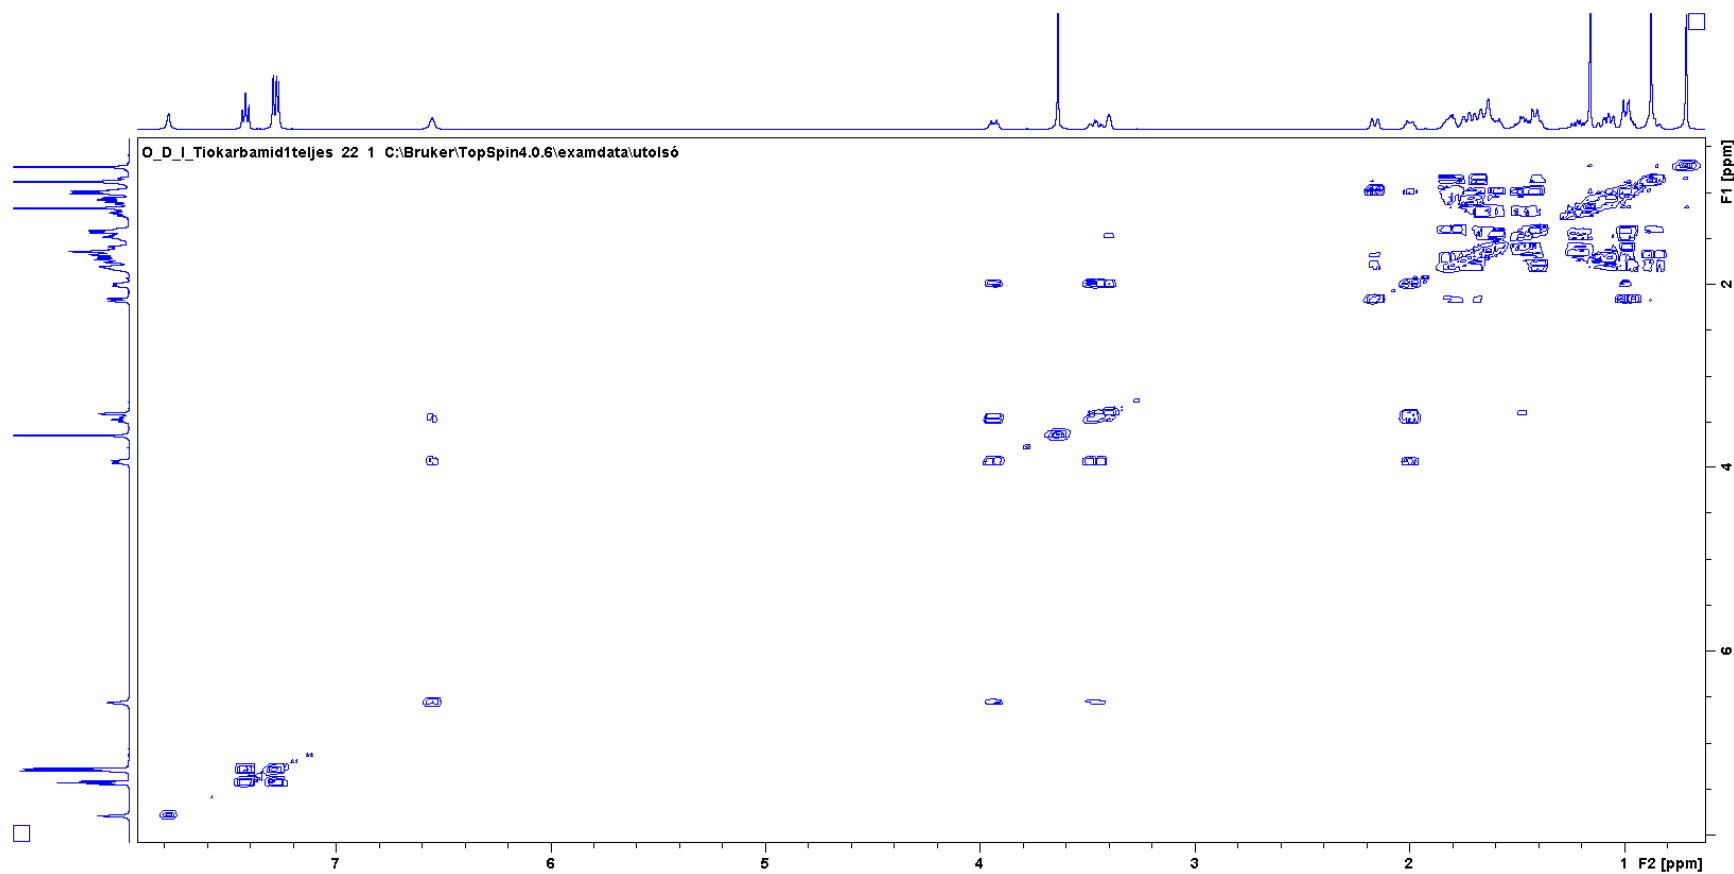

HSQC of compound (4*R*,6*aS*,8*R*,9*S*,11*bS*)-Methyl 8-hydroxy-4,9,11*b*-trimethyl-7-((3-phenylthioureido)methyl)tetradecahydro-6*a*,9-methanocyclohepta[*a*]naphthalene-4-carboxylate (**25**)

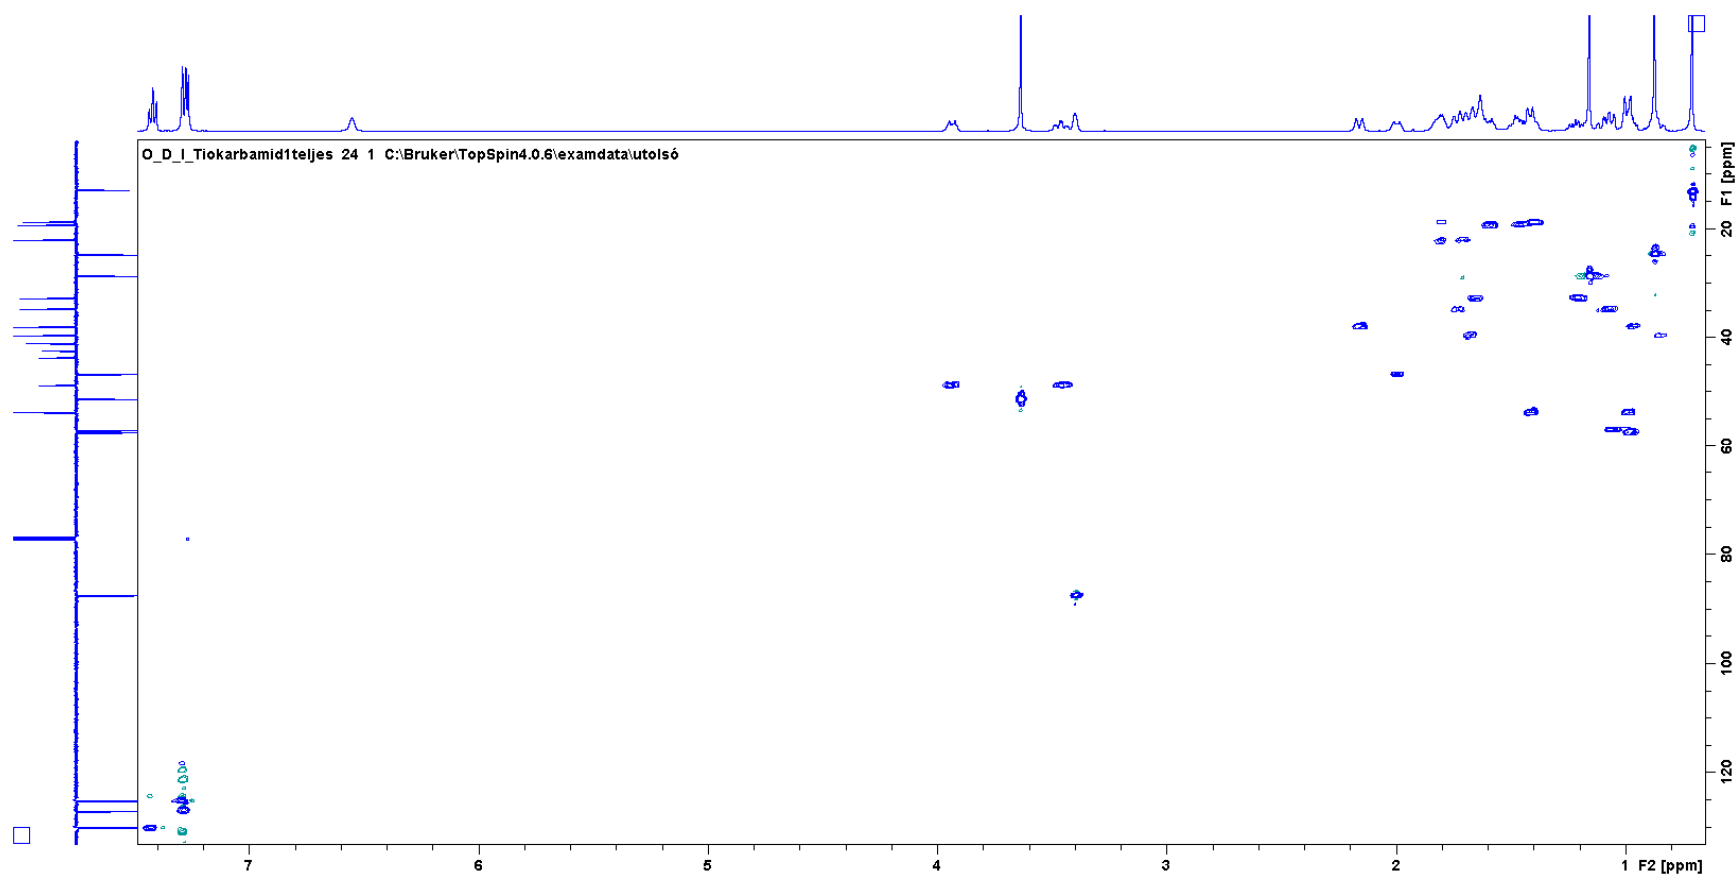

HMBC of compound (4*R*,6*aS*,8*R*,9*S*,11*bS*)-Methyl 8-hydroxy-4,9,11*b*-trimethyl-7-((3-phenylthioureido)methyl)tetradecahydro-6*a*,9-methanocyclohepta[*a*]naphthalene-4-carboxylate (**25**)

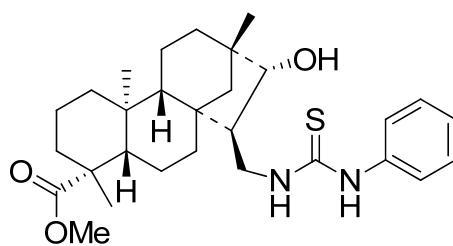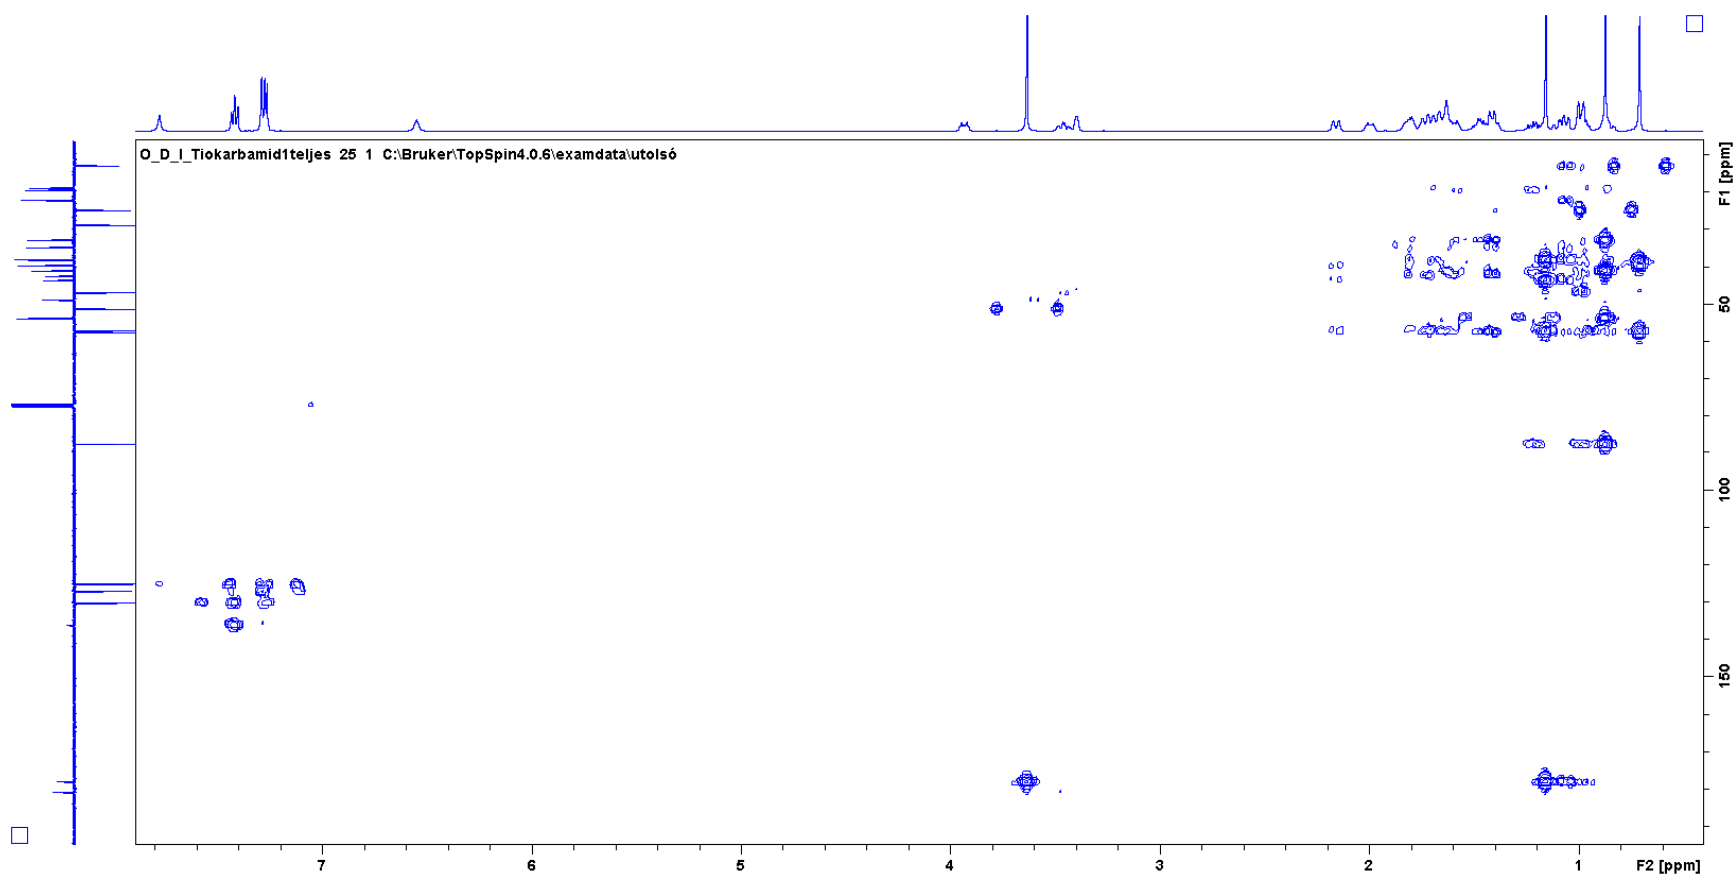

<sup>1</sup>H-NMR of compound (4*R*,6*aS*,8*R*,9*S*,11*bS*)-Methyl 8-hydroxy-4,9,11*b*-trimethyl-7-(((methylthio)(phenylimino)methyl)amino)methyl)tetradecahydro-6*a*,9-methanocyclohepta[*a*]naphthalene-4-carboxylate (26)

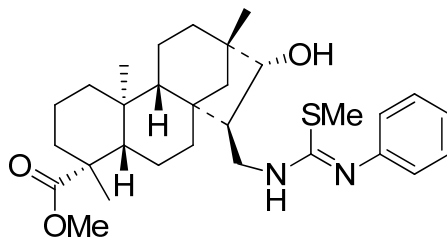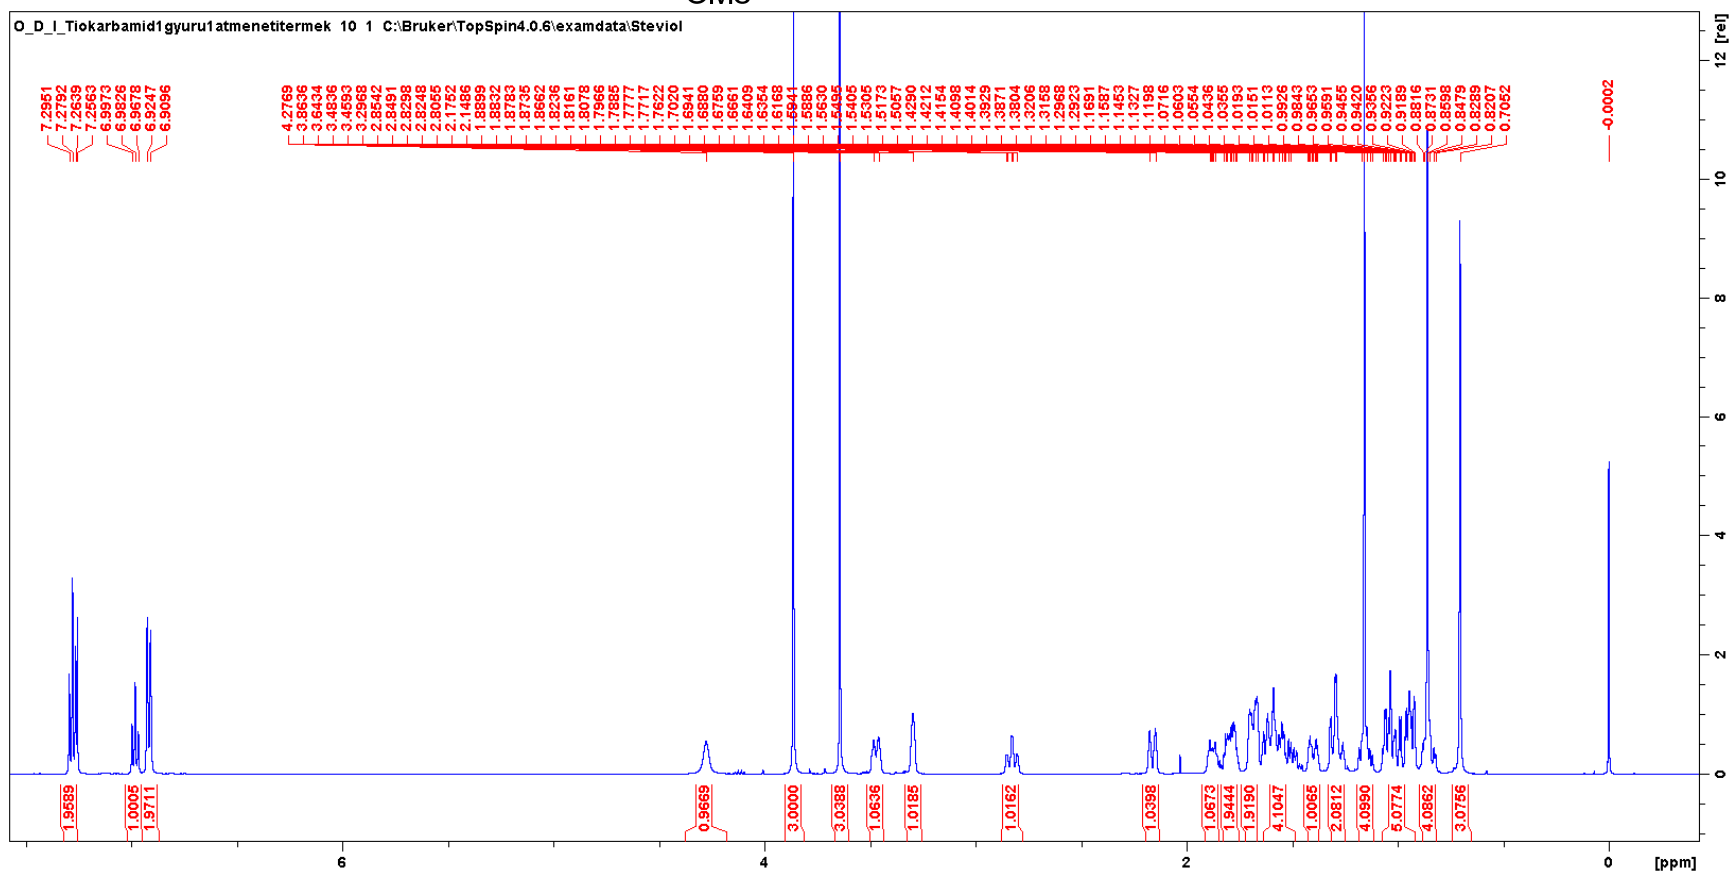



$^{13}\text{C}$ -NMR of compound (4*R*,6*aS*,8*R*,9*S*,11*bS*)-Methyl 8-hydroxy-4,9,11*b*-trimethyl-7-(((methylthio)(phenylimino)methyl)amino)methyl)tetradecahydro-6*a*,9-methanocyclohepta[*a*]naphthalene-4-carboxylate (26)

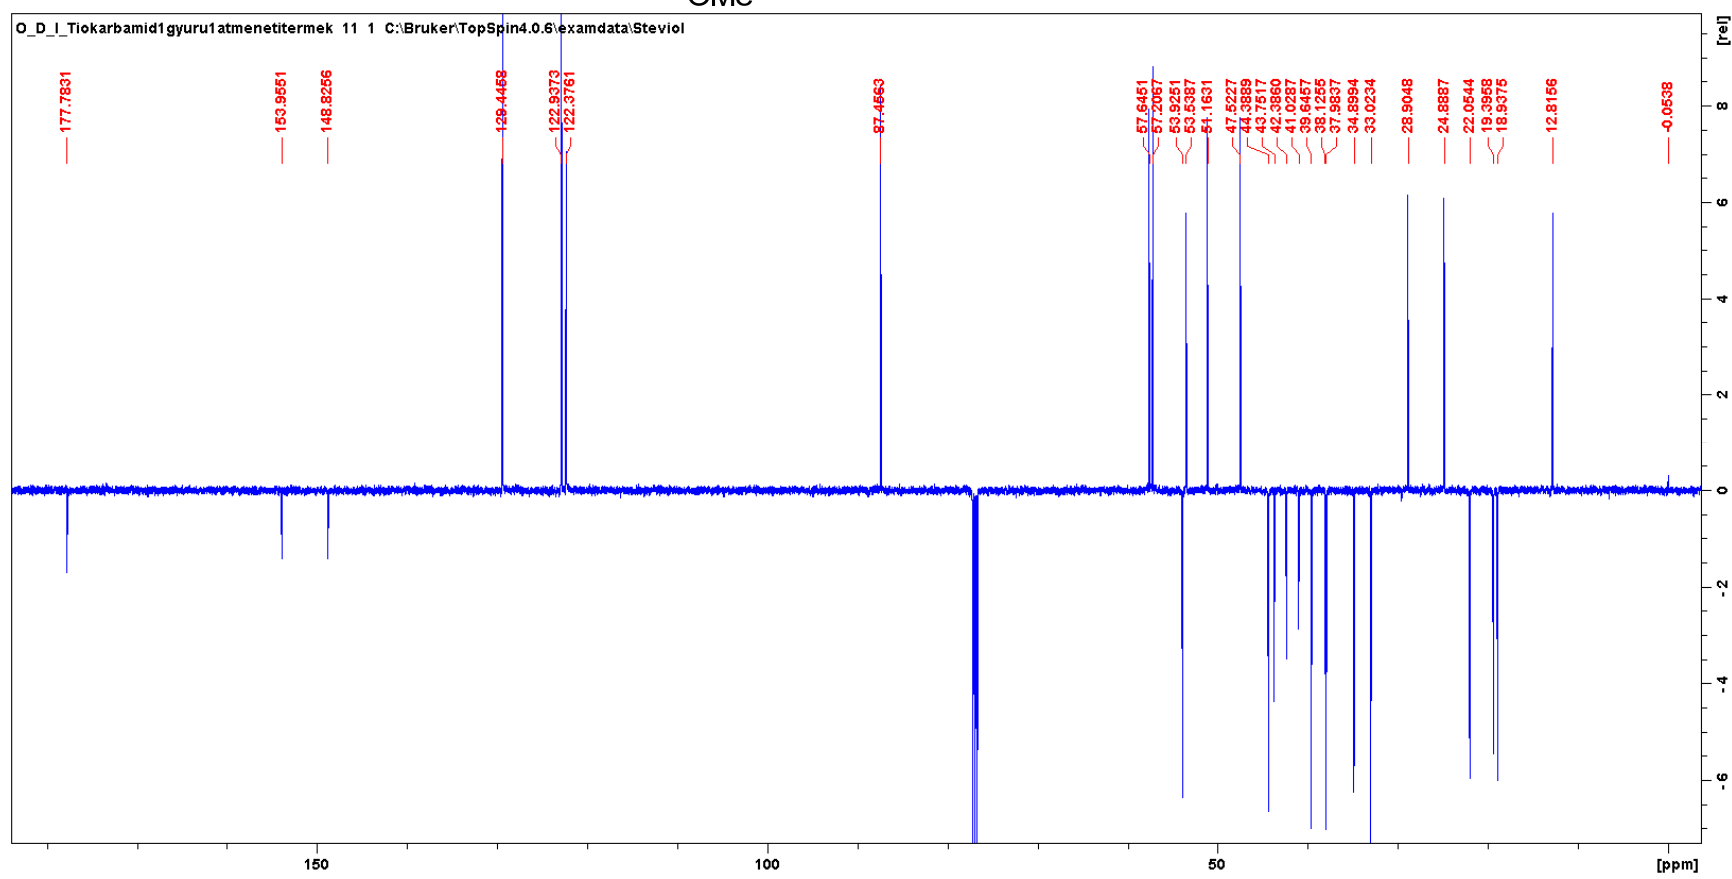

COSY of compound (4*R*,6*aS*,8*R*,9*S*,11*bS*)-Methyl 8-hydroxy-4,9,11*b*-trimethyl-7-(((methylthio)(phenylimino)methyl)amino)methyl)tetradecahydro-6*a*,9-methanocyclohepta[*a*]naphthalene-4-carboxylate (26)

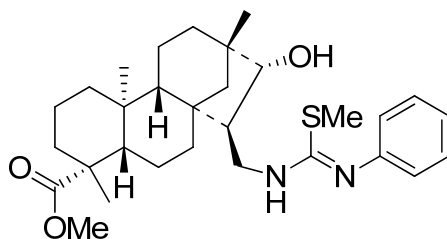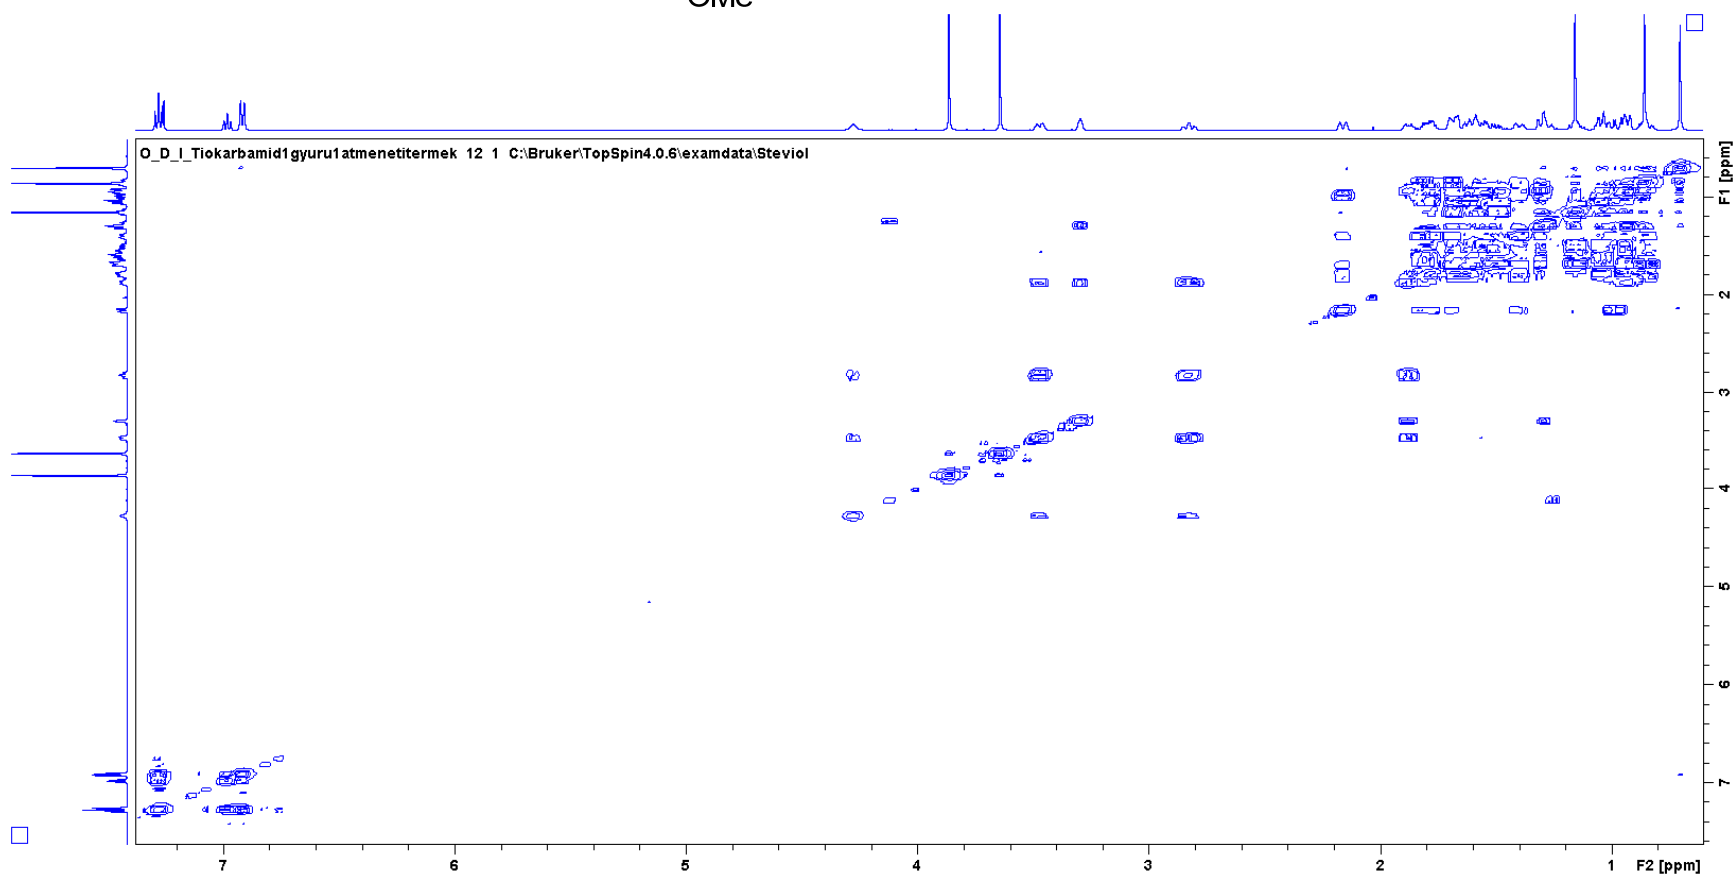

NOESY of compound (4*R*,6*aS*,8*R*,9*S*,11*bS*)-Methyl 8-hydroxy-4,9,11*b*-trimethyl-7-(((methylthio)(phenylimino)methyl)amino)methyl)tetradecahydro-6*a*,9-methanocyclohepta[*a*]naphthalene-4-carboxylate (26)

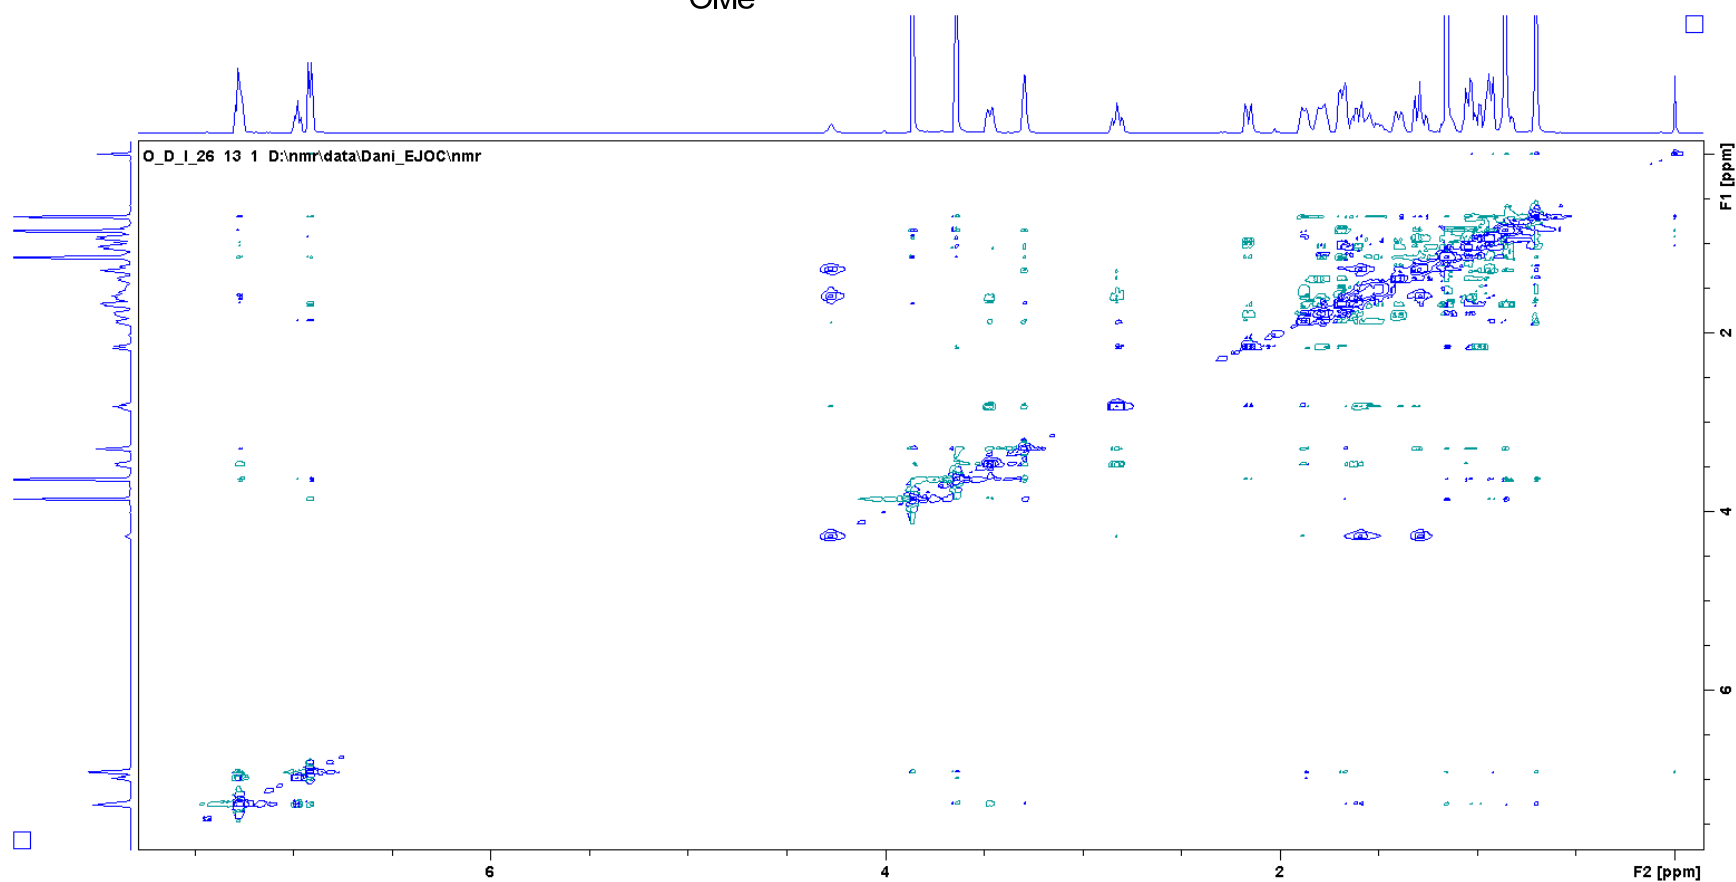

HSQC of compound (4*R*,6*aS*,8*R*,9*S*,11*bS*)-Methyl 8-hydroxy-4,9,11*b*-trimethyl-7-(((methylthio)(phenylimino)methyl)amino)methyl)tetradecahydro-6*a*,9-methanocyclohepta[*a*]naphthalene-4-carboxylate (26)

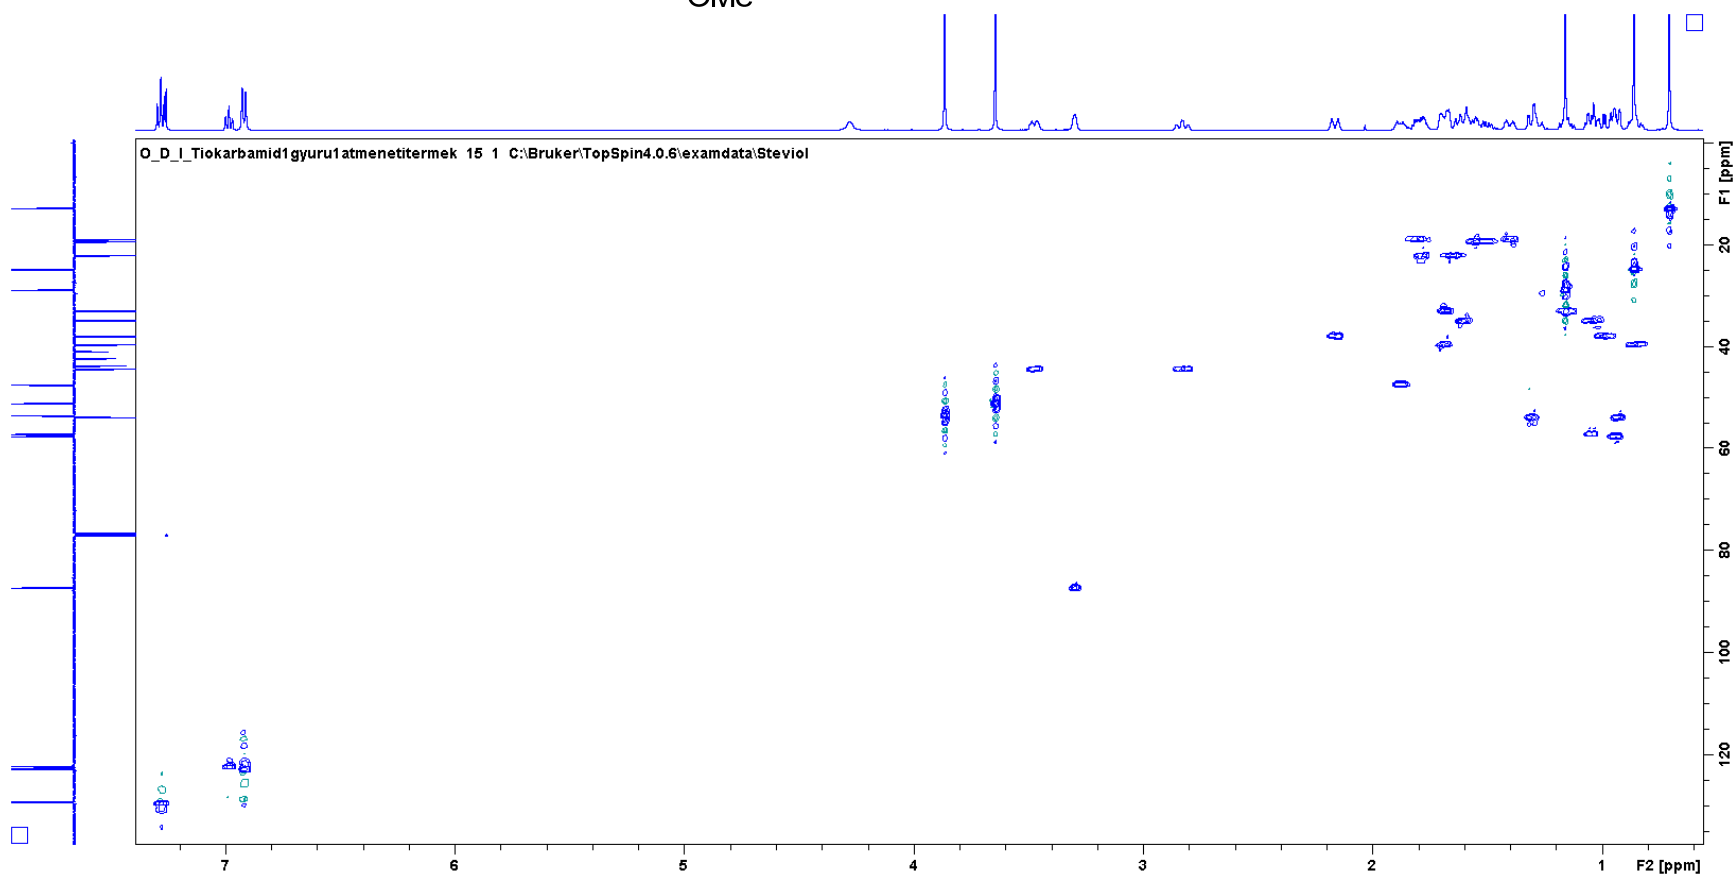

HMBC of compound (4*R*,6*aS*,8*R*,9*S*,11*bS*)-Methyl 8-hydroxy-4,9,11*b*-trimethyl-7-(((methylthio)(phenylimino)methyl)amino)methyl)tetradecahydro-6*a*,9-methanocyclohepta[*a*]naphthalene-4-carboxylate (26)

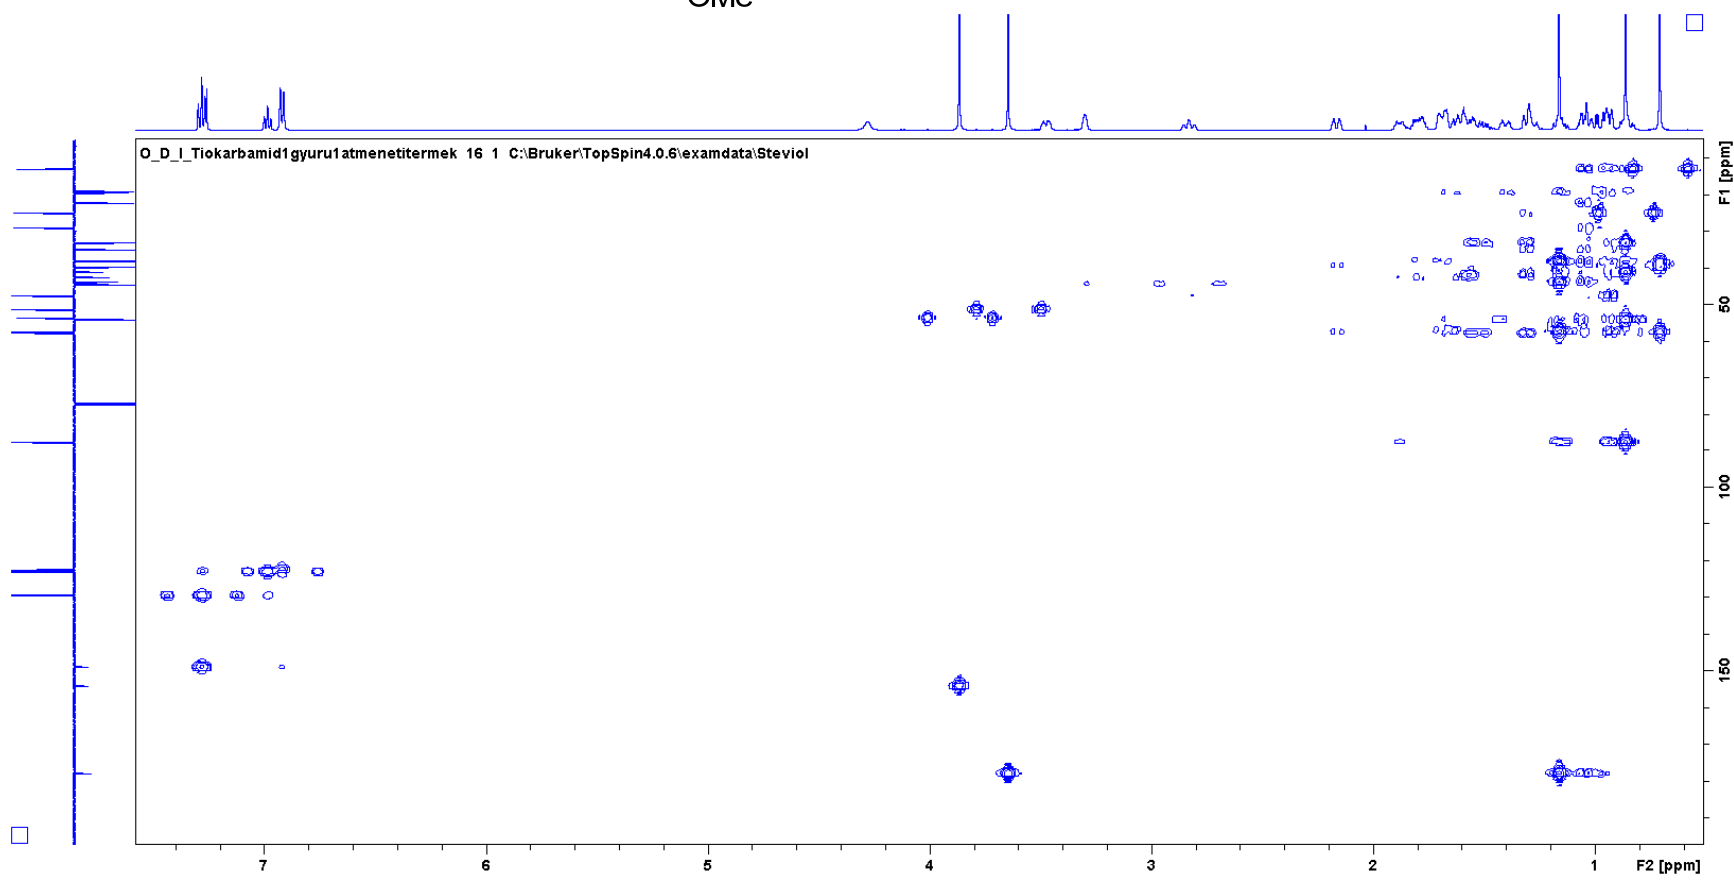

$^1\text{H}$ -NMR of compound (4*R*,6*aS*,8*R*,9*S*,11*bS*)-Methyl 8-hydroxy-4,9,11*b*-trimethyl-7-(((ethythio)(phenylimino)methyl)amino)methyl)tetradecahydro-6*a*,9-methanocyclohepta[*a*]naphthalene-4-carboxylate (28)

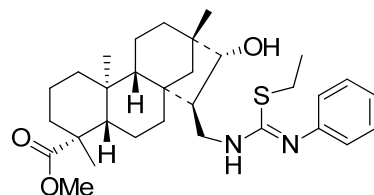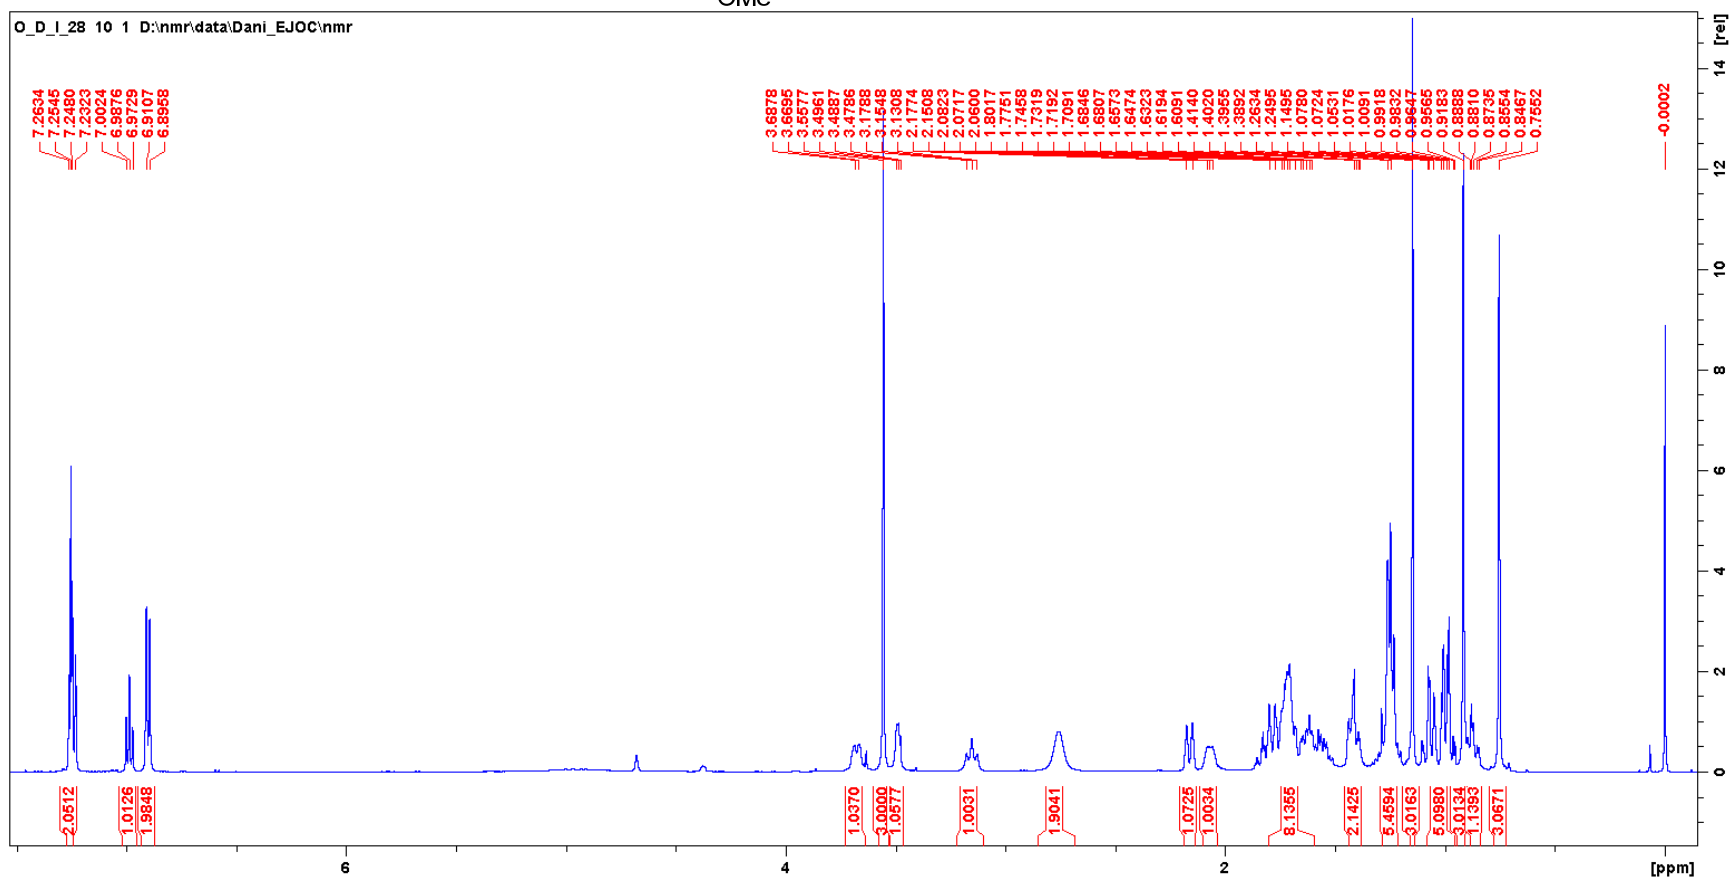

$^{13}\text{C}$ -NMR of compound (4*R*,6*aS*,8*R*,9*S*,11*bS*)-Methyl 8-hydroxy-4,9,11*b*-trimethyl-7-(((ethythio)(phenylimino)methyl)amino)methyl)tetradecahydro-6*a*,9-methanocyclohepta[*a*]naphthalene-4-carboxylate (28)

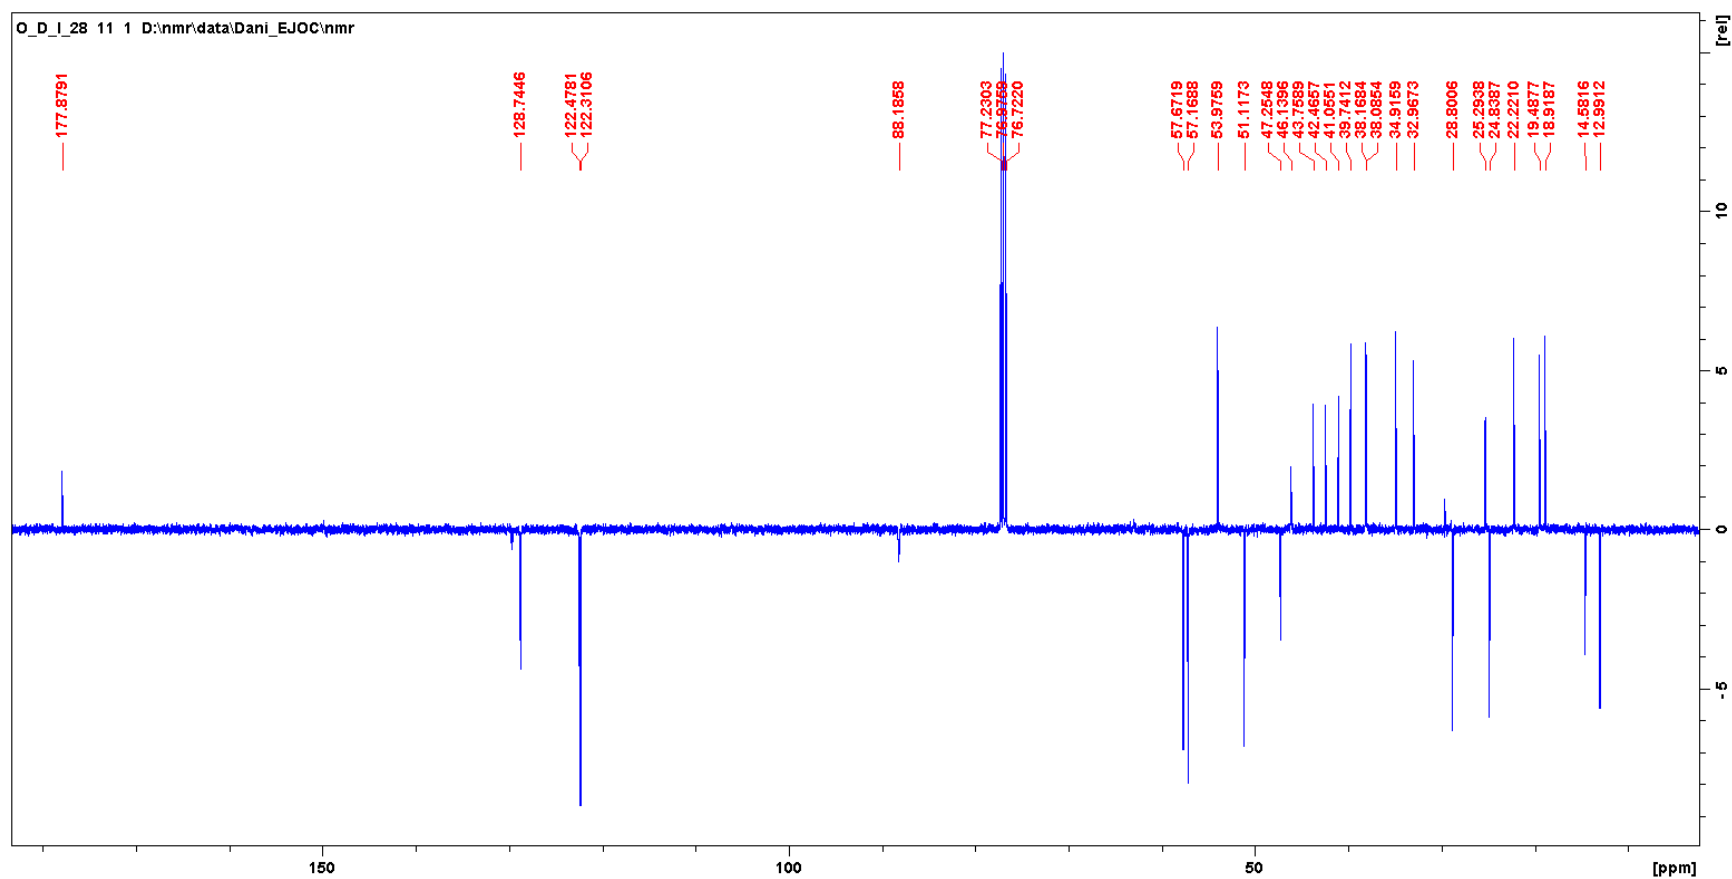

COSY of compound (4*R*,6*aS*,8*R*,9*S*,11*bS*)-Methyl 8-hydroxy-4,9,11*b*-trimethyl-7-(((ethythio)(phenylimino)methyl)amino)methyl)tetradecahydro-6*a*,9-methanocyclohepta[*a*]naphthalene-4-carboxylate (28)

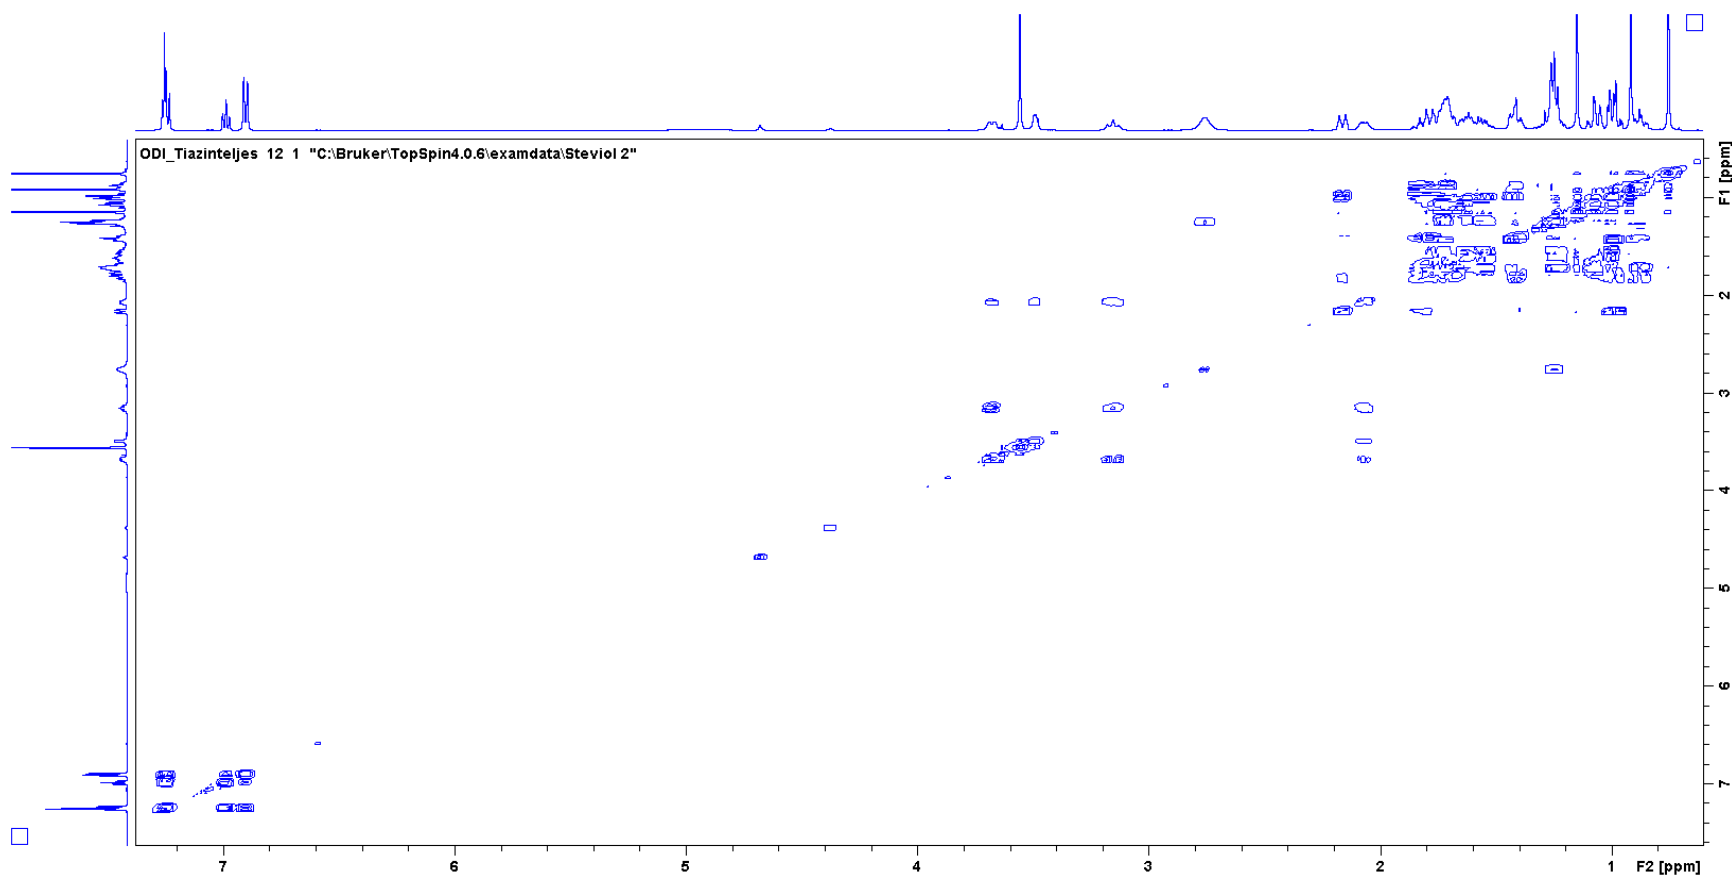



NOESY of compound (4*R*,6*aS*,8*R*,9*S*,11*bS*)-Methyl 8-hydroxy-4,9,11*b*-trimethyl-7-(((ethythio)(phenylimino)methyl)amino)methyl)tetradecahydro-6*a*,9-methanocyclohepta[*a*]naphthalene-4-carboxylate (28)

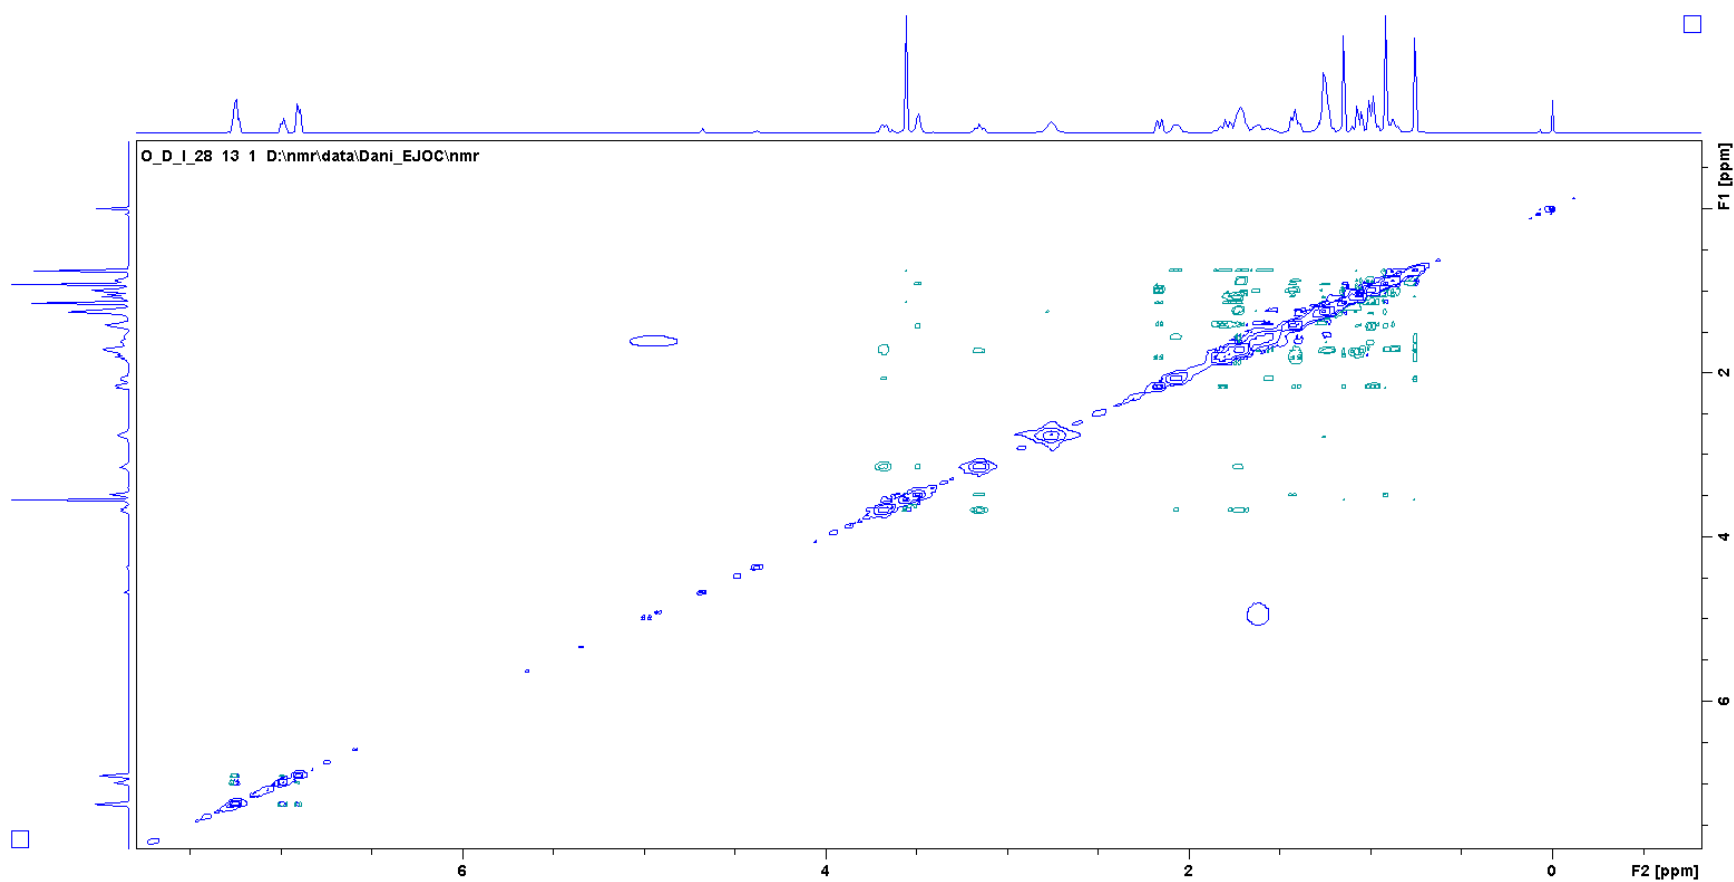

HSQC of compound (4*R*,6*aS*,8*R*,9*S*,11*bS*)-Methyl 8-hydroxy-4,9,11*b*-trimethyl-7-(((ethythio)(phenylimino)methyl)amino)methyl)tetradecahydro-6*a*,9-methanocyclohepta[*a*]naphthalene-4-carboxylate (28)

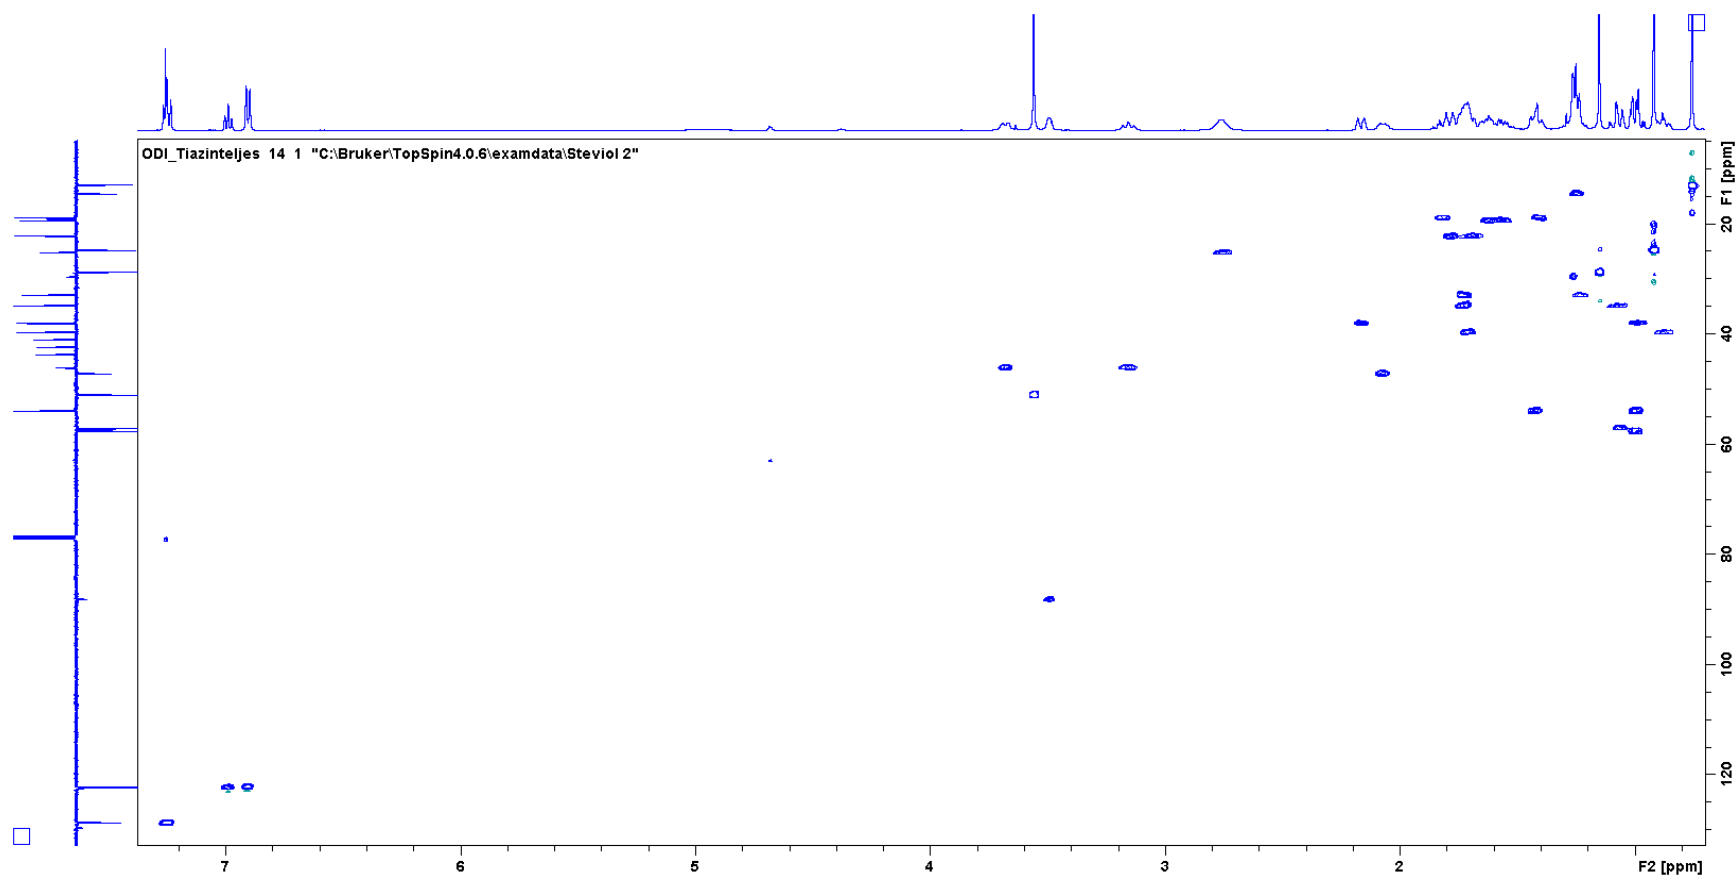

HMBC of compound (4*R*,6*aS*,8*R*,9*S*,11*bS*)-Methyl 8-hydroxy-4,9,11*b*-trimethyl-7-(((ethythio)(phenylimino)methyl)amino)methyl)tetradecahydro-6*a*,9-methanocyclohepta[*a*]naphthalene-4-carboxylate (28)

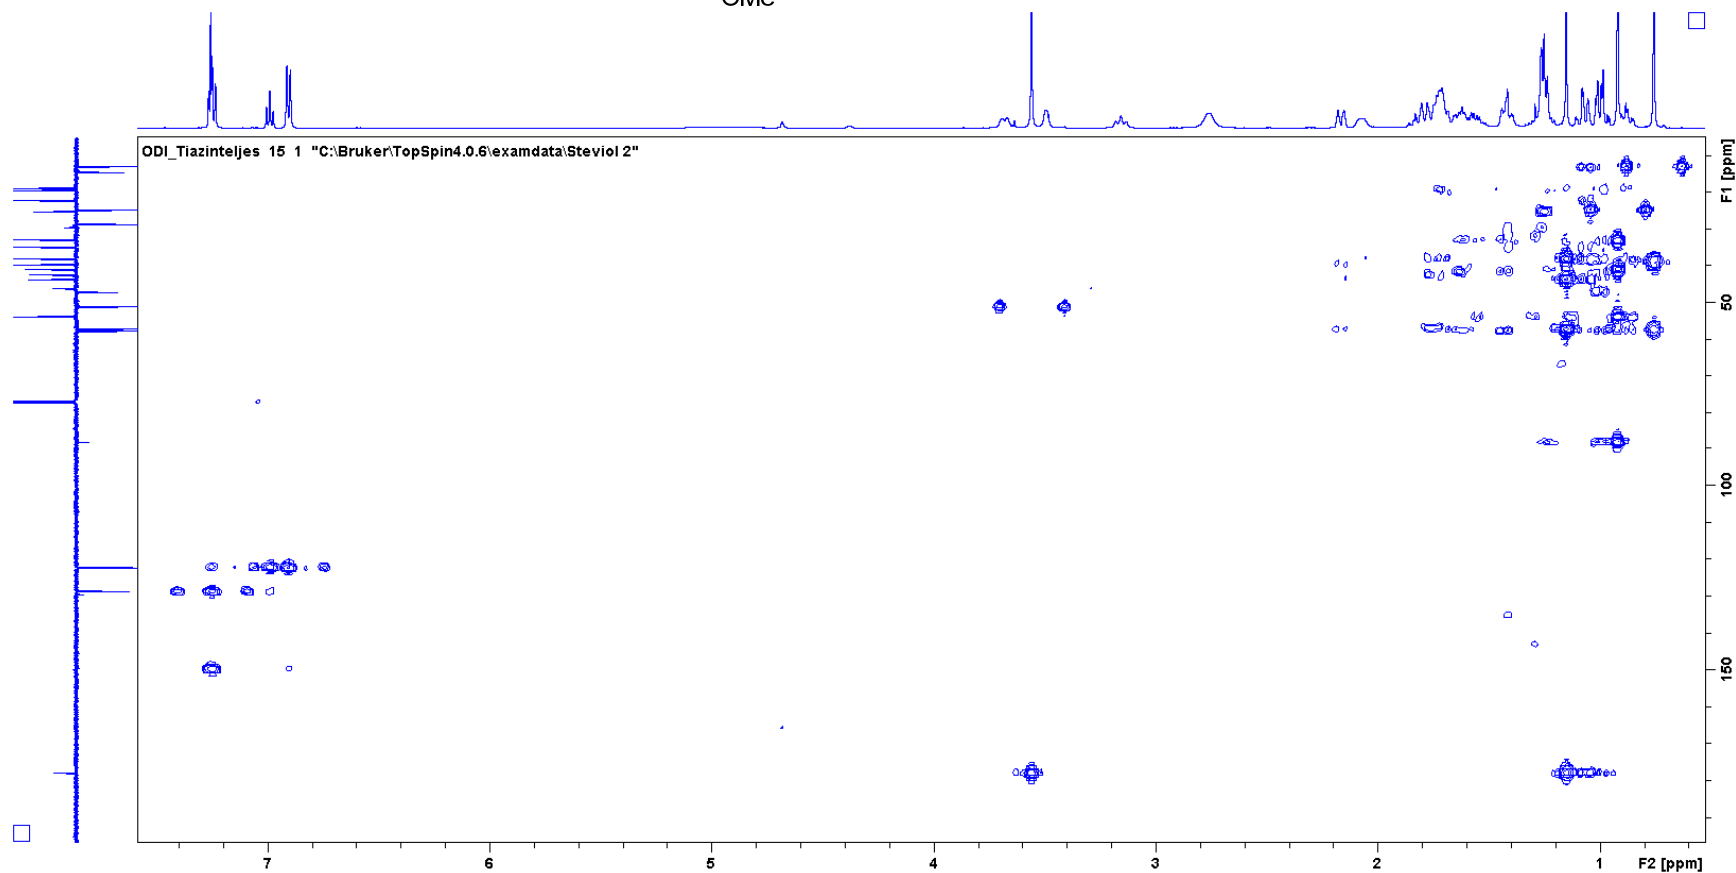

Supplement: s1 [file s1]
